# Supplementary material
Source: PubMed Central journal article supplement (PMC5154363)

**SUPPLEMENTARY MATERIAL for**

**Clerodane Diterpenes: Sources, Structures, and Biological Activities**

*Rongtao Li<sup>a,b\*</sup>, Susan L. Morris-Natschke<sup>b</sup>, and Kuo-Hsiung Lee<sup>b,c\*</sup>*

**CONTENT:**

**Structures of Clerodane Diterpenes arranged by Source**

**Abbreviations for Functional Groups**

**ADELANTHUS Genus**

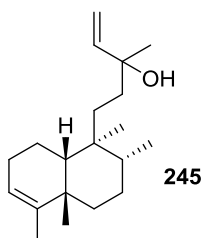

|            |                                                |                                   |                                                   |
|------------|------------------------------------------------|-----------------------------------|---------------------------------------------------|
| <b>245</b> | 13-hydroxy- <i>cis-ent</i> -cleroda-3,14-diene | <i>Adelanthus lindenbergianus</i> | <i>Phytochemistry</i> , 2004, <b>65</b> , 127–137 |
|------------|------------------------------------------------|-----------------------------------|---------------------------------------------------|

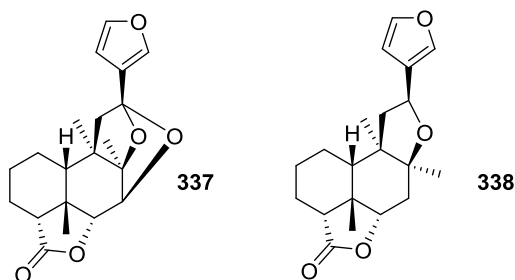

|            |                                                                                                    |                                   |                                                   |
|------------|----------------------------------------------------------------------------------------------------|-----------------------------------|---------------------------------------------------|
| <b>337</b> | anastreptin                                                                                        | <i>Adelanthus lindenbergianus</i> | <i>Phytochemistry</i> , 2004, <b>65</b> , 127–137 |
| <b>338</b> | 8 $\beta$ ,12:15,16-diepoxy- <i>cis-ent</i> -cleroda-13(16),14-dien-18 $\alpha$ ,6 $\alpha$ -olide |                                   |                                                   |

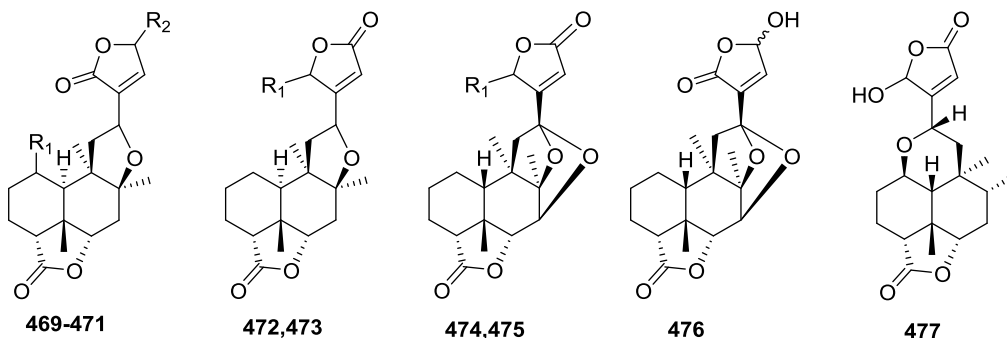

|            |                                                                                                                                | R1           | R2          |                                   |                                                   |
|------------|--------------------------------------------------------------------------------------------------------------------------------|--------------|-------------|-----------------------------------|---------------------------------------------------|
| <b>469</b> | 1 $\alpha$ -acetoxy-8 $\beta$ ,12-epoxy-15-hydroxy- <i>cis-ent</i> -cleroda-13-en-16,15:18 $\alpha$ ,6 $\alpha$ -diolide       | $\alpha$ OAc | OH          | <i>Adelanthus lindenbergianus</i> | <i>Phytochemistry</i> , 2004, <b>65</b> , 127–137 |
| <b>470</b> | 8 $\beta$ ,12-epoxy-15 $\alpha$ -hydroxy- <i>trans</i> -cleroda-13-en-16,15:18 $\alpha$ ,6 $\alpha$ -diolide                   | H            | $\alpha$ OH |                                   |                                                   |
| <b>471</b> | 8 $\beta$ ,12-epoxy-15 $\beta$ -hydroxy- <i>trans</i> -cleroda-13-en-16,15:18 $\alpha$ ,6 $\alpha$ -diolide                    | H            | $\beta$ OH  |                                   |                                                   |
| <b>472</b> | 8 $\beta$ ,12-epoxy-16 $\alpha$ -hydroxy- <i>trans</i> -cleroda-13-en-15,16:18 $\alpha$ ,6 $\alpha$ -diolide                   | $\alpha$ OH  | —           |                                   |                                                   |
| <b>473</b> | 8 $\beta$ ,12-epoxy-16 $\beta$ -hydroxy- <i>trans</i> -cleroda-13-en-15,16:18 $\alpha$ ,6 $\alpha$ -diolide                    | $\beta$ OH   | —           |                                   |                                                   |
| <b>474</b> | 7 $\beta$ ,12:8 $\beta$ ,12-diepoxy-16 $\alpha$ -hydroxy- <i>cis-ent</i> -cleroda-13-en-15,16:18 $\alpha$ ,6 $\alpha$ -diolide | $\alpha$ OH  | —           |                                   |                                                   |
| <b>475</b> | 7 $\beta$ ,12:8 $\beta$ ,12-diepoxy-16 $\beta$ -hydroxy- <i>cis-</i>                                                           | $\beta$ OH   | —           |                                   |                                                   |

|     |                                                                                                                      |   |   |  |  |
|-----|----------------------------------------------------------------------------------------------------------------------|---|---|--|--|
|     | <i>ent</i> -cleroda-13-en-15,16:18 $\alpha$ ,6 $\alpha$ -diolide                                                     |   |   |  |  |
| 476 | 7 $\beta$ ,12:8 $\beta$ ,12-diepoxy-15-hydroxy- <i>cis-ent</i> -cleroda-13-en-16,15:18 $\alpha$ ,6 $\alpha$ -diolide | — | — |  |  |
| 477 | 1 $\beta$ ,12-epoxy-16-hydroxy- <i>cis-ent</i> -cleroda-13-en-15,16:18 $\alpha$ ,6 $\alpha$ -diolide                 | — | — |  |  |

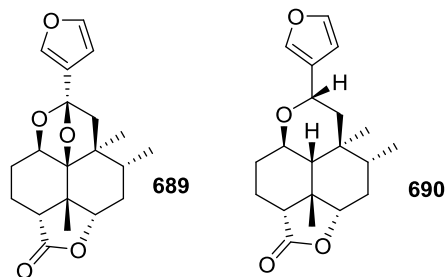

|     |                                                                                                    |                                   |                                                   |
|-----|----------------------------------------------------------------------------------------------------|-----------------------------------|---------------------------------------------------|
| 689 | orcadensin                                                                                         | <i>Adelanthus lindenbergianus</i> | <i>Phytochemistry</i> , 2004, <b>65</b> , 127–137 |
| 690 | 1 $\beta$ ,12:15,16-diepoxy- <i>cis-ent</i> -cleroda-13(16),14-dien-18 $\alpha$ ,6 $\alpha$ -olide |                                   |                                                   |

### AGELAS Genus

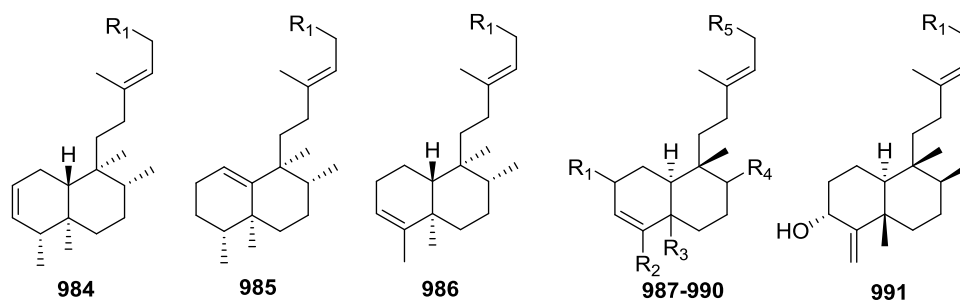

|     |             | R1             | R2                              | R3          | R4          | R5             |                                     |                                                    |
|-----|-------------|----------------|---------------------------------|-------------|-------------|----------------|-------------------------------------|----------------------------------------------------|
| 984 | agelasine K | Z <sub>7</sub> | —                               | —           | —           | —              | <i>Agelas</i> cf. <i>mauritiana</i> | <i>J. Nat. Prod.</i> , 2008, <b>71</b> , 1451–1454 |
| 985 | agelasine L | Z <sub>7</sub> | —                               | —           | —           | —              |                                     |                                                    |
| 986 | axistatin 2 | Z <sub>8</sub> | —                               | —           | —           | —              | <i>Agelas axifera</i>               | <i>J. Nat. Prod.</i> , 2013, <b>76</b> , 420-424   |
| 987 | axistatin 1 | H              | Me                              | $\alpha$ Me | $\beta$ Me  | Z <sub>8</sub> |                                     |                                                    |
| 988 | agelasine P | =O             | CH <sub>2</sub> OZ <sub>5</sub> | $\alpha$ Me | $\beta$ Me  | Z <sub>6</sub> | <i>Agelas</i> sp. (NSS-19)          | <i>Tetrahedron</i> , 2012, <b>68</b> , 9738-9744   |
| 989 | agelasine Q | H              | CH <sub>2</sub> OZ <sub>5</sub> | $\alpha$ Me | $\alpha$ Me | Z <sub>6</sub> |                                     |                                                    |
| 990 | agelasine R | H              | CH <sub>2</sub> OZ <sub>5</sub> | $\beta$ Me  | $\beta$ Me  | Z <sub>6</sub> |                                     |                                                    |
| 991 | agelasine U | Z <sub>6</sub> | —                               | —           | —           | —              |                                     |                                                    |

**AJUGA Genus**

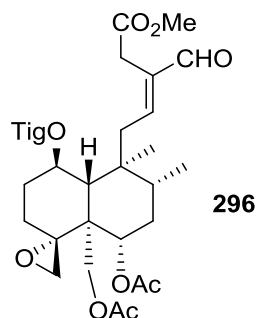

|     |               |                        |                                                    |
|-----|---------------|------------------------|----------------------------------------------------|
| 296 | ajugacumbin J | <i>Ajuga decumbens</i> | <i>Nat. Prod. Res.</i> , 2014, <b>28</b> , 196-200 |
|-----|---------------|------------------------|----------------------------------------------------|

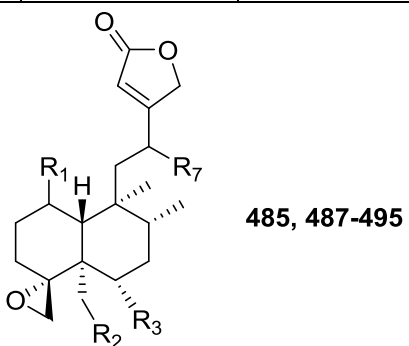

|     |                                                                                                                        | R1                     | R2   | R3  | R7                       |                          |                                                                   |
|-----|------------------------------------------------------------------------------------------------------------------------|------------------------|------|-----|--------------------------|--------------------------|-------------------------------------------------------------------|
| 485 | (12 <i>S</i> )-6 $\alpha$ -acetoxy-4 $\alpha$ ,18-epoxy-12-hydroxy-19-tigloyloxy- <i>neo</i> -clerod-13-en-15,16-olide | H                      | OTig | OAc | $\beta$ OH               | <i>Ajuga ciliate</i>     | <i>Phytochem. Lett.</i> , 2012, <b>5</b> , 563-566                |
| 487 | ajugapantin A                                                                                                          | $\beta$ OAc            | OAc  | OAc | $\alpha$ OAc             | <i>Ajuga pantantha</i>   | <i>Phytochemistry</i> , 1993, <b>34</b> , 1091-1094               |
| 488 | ajugamacrin C                                                                                                          | $\beta$ OiBu           | OAc  | OAc | $\alpha$ OiBu            |                          |                                                                   |
| 489 | ajugamacrin D                                                                                                          | $\beta$ OiBu           | OAc  | OAc | $\alpha$ OY <sub>1</sub> |                          |                                                                   |
| 490 | ajugamacrin E                                                                                                          | $\beta$ Y <sub>1</sub> | OAc  | OAc | $\alpha$ OiBu            | <i>Ajuga macrosperma</i> | <i>Phytochemistry</i> , 1993, <b>33</b> , 887-889                 |
| 491 | ajugamacrin A                                                                                                          | $\beta$ OAc            | OAc  | OAc | $\beta$ iBu              |                          |                                                                   |
| 492 | ajugamacrin B                                                                                                          | $\beta$ OAc            | OAc  | OAc | $\beta$ Y <sub>1</sub>   | <i>Ajuga decumbens</i>   | <i>Biosci. Biotechnol. Biochem.</i> , 1997, <b>61</b> , 1518-1522 |
| 493 | ajugatakasin A                                                                                                         | OTig                   | OAc  | OAc | OTig                     |                          |                                                                   |
| 494 | ajugatakasin B                                                                                                         | Y <sub>1</sub>         | OAc  | OAc | Y <sub>1</sub>           |                          |                                                                   |
| 495 | ajugamarin L2                                                                                                          | H                      | OTig | OH  | H                        | <i>Ajuga nipponensis</i> | <i>Chin. Chem. Lett.</i> , 1995, <b>6</b> , 581-582               |

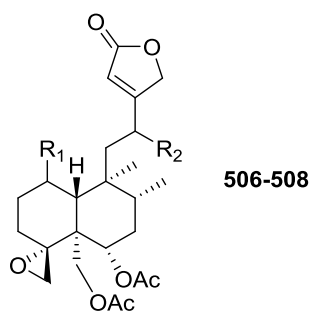

|            |             | R1          | R2           |                          |                                                       |
|------------|-------------|-------------|--------------|--------------------------|-------------------------------------------------------|
| <b>506</b> | ajugalide A | $\beta$ OH  | $\alpha$ OAc | <i>Ajuga taiwanensis</i> | <i>Chem. Pharm. Bull.</i> , 2005, <b>53</b> , 164-167 |
| <b>507</b> | ajugalide B | $\beta$ OAc | $\alpha$ OH  |                          |                                                       |
| <b>508</b> | ajugalide C | H           | $\alpha$ OH  |                          |                                                       |

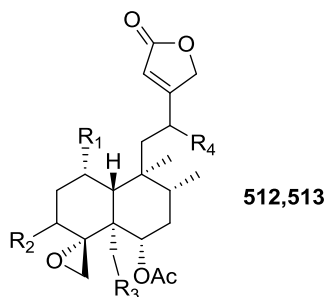

|            |                                  |     |             |          |             |                        |                                                         |
|------------|----------------------------------|-----|-------------|----------|-------------|------------------------|---------------------------------------------------------|
| <b>512</b> | ajugacumbin E                    | OAc | $\beta$ OAc | $X_{12}$ | H           | <i>Ajuga decumbens</i> | <i>Chem. Pharm. Bull.</i> , 1990, <b>38</b> , 3167-3168 |
| <b>513</b> | 3 $\alpha$ -hydroxyajugamarin F4 | H   | $\alpha$ OH | OAc      | $\beta Y_1$ | <i>Ajuga reptans</i>   | <i>Phytochemistry</i> , 1998, <b>47</b> , 1227-1232     |

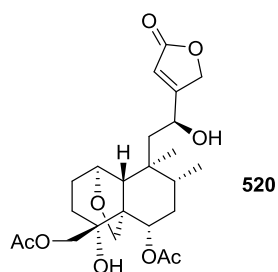

|            |                                                                                                                             |  |  |  |  |                        |                                                  |
|------------|-----------------------------------------------------------------------------------------------------------------------------|--|--|--|--|------------------------|--------------------------------------------------|
| <b>520</b> | (12 <i>S</i> )-1 $\alpha$ ,19-epoxy-6 $\alpha$ ,18-diacetoxy-4 $\alpha$ ,12-dihydroxy- <i>neo</i> -clerod-13-en-15,16-olide |  |  |  |  | <i>Ajuga decumbens</i> | <i>Fitoterapia</i> , 2012, <b>83</b> , 1409-1414 |
|------------|-----------------------------------------------------------------------------------------------------------------------------|--|--|--|--|------------------------|--------------------------------------------------|

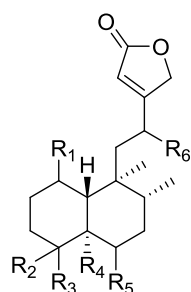

601-608

|            |                                                                                                                                   | R1           | R2                                     | R3                          | R4                   | R5          | R6          |                          |                                                         |
|------------|-----------------------------------------------------------------------------------------------------------------------------------|--------------|----------------------------------------|-----------------------------|----------------------|-------------|-------------|--------------------------|---------------------------------------------------------|
| <b>601</b> | (12 <i>S</i> )-6 $\alpha$ ,18,19-tri-acetoxy-4 $\alpha$ ,12-dihydroxy-1 $\beta$ -tigloyloxy- <i>neo</i> -clerod-13-en-15,16-olide | $\beta$ OTig | $\beta$ CH <sub>2</sub> OAc            | $\alpha$ OH                 | CH <sub>2</sub> OAc  | $\beta$ OAc | $\beta$ OH  | <i>Ajuga ciliate</i>     | <i>Fitoterapia</i> , 2011, <b>82</b> , 1123-1127        |
| <b>602</b> | ajugaciliatin I                                                                                                                   | H            | $\beta$ CH <sub>2</sub> OAc            | $\alpha$ OH                 | CH <sub>2</sub> OTig | $\beta$ OH  | H           |                          | <i>J. Nat. Prod.</i> , 2011, <b>74</b> , 1575–1583      |
| <b>603</b> | ajugaciliatin J                                                                                                                   | H            | $\beta$ CH <sub>2</sub> OTig           | $\alpha$ OH                 | CH <sub>2</sub> OH   | $\beta$ OH  | H           |                          |                                                         |
| <b>604</b> | (12 <i>S</i> )-18,19-diacetoxy-4 $\alpha$ ,6 $\alpha$ ,12-trihydroxy-1 $\beta$ -tigloyloxy- <i>neo</i> -clerod-13-en-15,16-olide  | $\beta$ OTig | $\beta$ CH <sub>2</sub> OAc            | $\alpha$ OH                 | CH <sub>2</sub> OAc  | $\beta$ OH  | $\beta$ OH  | <i>Ajuga decumbens</i>   | <i>Planta Med.</i> , 2012, <b>78</b> , 1579-1583        |
| <b>605</b> | 4 $\alpha$ ,6 $\alpha$ -dihydroxy-18-(4'-methoxy-4'-oxobutyryloxy)-19-tigloyloxy- <i>neo</i> -clerod-13-en-15,16-olide            | H            | $\beta$ CH <sub>2</sub> X <sub>7</sub> | $\alpha$ OH                 | CH <sub>2</sub> OTig | $\beta$ OH  | $\beta$ H   |                          |                                                         |
| <b>606</b> | 6 $\alpha$ ,18-diacetoxy-4 $\alpha$ -hydroxy-19-tigloyloxy- <i>neo</i> -clerod-13-en-15,16-olide                                  | H            | $\beta$ CH <sub>2</sub> OAc            | $\alpha$ OH                 | CH <sub>2</sub> OTig | $\beta$ OAc | H           | <i>Ajuga ciliate</i>     | <i>Phytochem. Lett.</i> , 2012, <b>5</b> , 563-566      |
| <b>607</b> | ajugalide D                                                                                                                       | H            | H                                      | $\alpha$ CO <sub>2</sub> Me | Me                   | $\alpha$ OH | $\alpha$ OH | <i>Ajuga taiwanensis</i> | <i>Chem. Pharm. Bull.</i> , 2005, <b>53</b> , 164-167   |
| <b>608</b> | ajugacumbin F                                                                                                                     | H            | $\beta$ CH <sub>2</sub> OH             | $\alpha$ OH                 | CH <sub>2</sub> OTig | $\alpha$ OH | H           | <i>Ajuga decumbens</i>   | <i>Chem. Pharm. Bull.</i> , 1990, <b>38</b> , 3167-3168 |

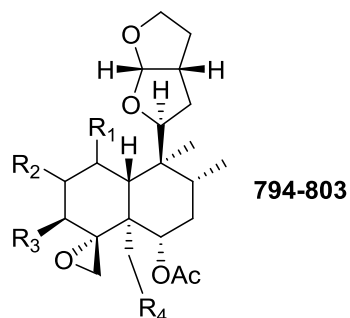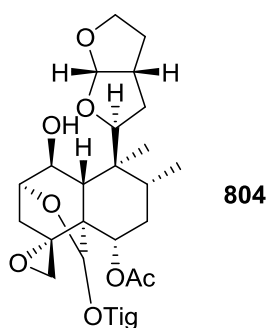

| No. | Compound Name            | R <sub>1</sub>   | R <sub>2</sub> | R <sub>3</sub> | R <sub>4</sub> | Source                   | Ref.                                                |
|-----|--------------------------|------------------|----------------|----------------|----------------|--------------------------|-----------------------------------------------------|
| 794 | lupulin F                | H                | αOH            | OPr            | OAc            | <i>Ajuga lupulina</i>    | <i>Indian J. Chem.</i> , 1999, <b>38B</b> , 743-745 |
| 795 | ajubractin C             | H                | H              | MeBuO          | OAc            | <i>Ajuga bracteosa</i>   | <i>J. Nat. Prod.</i> , 2011, <b>74</b> , 1036-1041  |
| 796 | ajubractin D             | H                | αOH            | OiBu           | OAc            |                          |                                                     |
| 797 | ajubractin E             | H                | H              | OH             | OAc            |                          |                                                     |
| 798 | areptin A                | βOH              | αOAc           | Y <sub>1</sub> | OAc            | <i>Ajuga reptans</i>     | <i>Phytochemistry</i> , 1998, <b>49</b> , 2443-2447 |
| 799 | ajugavensin A            | βOY <sub>1</sub> | H              | H              | OAc            | <i>Ajuga genevensis</i>  | <i>Phytochemistry</i> , 1991, <b>30</b> , 4083-4085 |
| 800 | ajugavensin B            | αOTig            | H              | H              | OAc            |                          |                                                     |
| 801 | ajugavensin C            | βOH              | H              | H              | OTig           |                          |                                                     |
| 802 | 3β-hydroxy-ajugavensin B | αOTig            | H              | OH             | OAc            | <i>Ajuga reptans</i>     | <i>Phytochemistry</i> , 1998, <b>47</b> , 1227-1232 |
| 803 | ajugorientin             | βOTig            | H              | OH             | OAc            | <i>Ajuga orientalis</i>  | <i>Phytochemistry</i> , 1997, <b>45</b> , 121-123   |
| 804 | ajugapyrin A             | --               | --             | --             | --             | <i>Ajuga pyramidalis</i> | <i>Phytochemistry</i> , 1998, <b>47</b> , 303-305   |

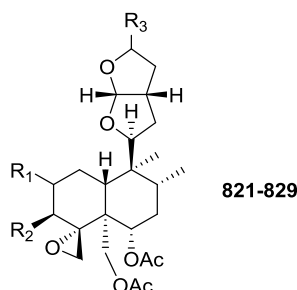

|     |                                                    | R1  | R2    | R3   |                          |                                                     |
|-----|----------------------------------------------------|-----|-------|------|--------------------------|-----------------------------------------------------|
| 821 | 15-epi-lupulin B                                   | αOH | MeBuO | αOMe | <i>Ajuga bracteosa</i>   | <i>J. Nat. Prod.</i> , 2011, <b>74</b> , 1036-1041  |
| 822 | lupulin A                                          | αOH | Y1    | βOMe | <i>Ajuga lupulina</i>    | <i>J. Nat. Prod.</i> , 1996, <b>59</b> , 668-670    |
| 823 | lupulin B                                          | H   | Y1    | αOMe |                          |                                                     |
| 824 | (15 <i>S</i> )-14,15-dihydro-15-hydroxyajugachin A | αOH | OiBu  | βOH  | <i>Ajuga salicifolia</i> | <i>Phytochemistry</i> , 1993, <b>34</b> , 1173-1175 |
| 825 | (15 <i>R</i> )-14,15-dihydro-15-hydroxyajugachin A | αOH | OiBu  | αOH  |                          |                                                     |
| 826 | 14,15-dihydro-15-oxoajugachin A                    | αOH | OiBu  | =O   |                          |                                                     |
| 827 | hativene A                                         | αOH | OiBu  | βOMe | <i>Ajuga pseudoiva</i>   | <i>Fitoterapia</i> , 2000, <b>71</b> , 105-112      |
| 828 | hativene B                                         | αOH | OiBu  | αOMe |                          |                                                     |
| 829 | hativene C                                         | βOH | OiBu  | αOMe |                          |                                                     |

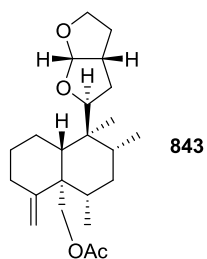

|            |           |                       |                                                  |
|------------|-----------|-----------------------|--------------------------------------------------|
| <b>843</b> | lupulin C | <i>Ajuga lupulina</i> | <i>J. Nat. Prod.</i> , 1996, <b>59</b> , 668-670 |
|------------|-----------|-----------------------|--------------------------------------------------|

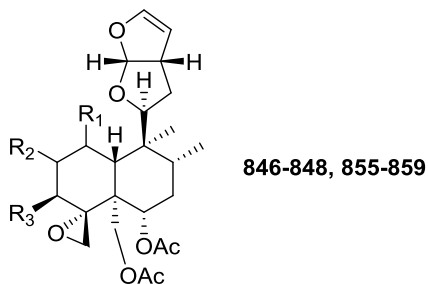

|            |              |                        |             |                 |                          |                                                        |
|------------|--------------|------------------------|-------------|-----------------|--------------------------|--------------------------------------------------------|
| <b>846</b> | lupulin E    | H                      | $\alpha$ OH | OPr             | <i>Ajuga lupulina</i>    | <i>Indian J. Chem.</i> , 1999, <b>38B</b> ,            |
| <b>847</b> | ajugachin A  | H                      | $\alpha$ OH | OiBu            | <i>Ajuga chamaepitys</i> | <i>Phytochemistry</i> , 1990, <b>29</b> ,<br>2931-2933 |
| <b>848</b> | ajugachin B  | H                      | $\alpha$ OH | Y <sub>11</sub> |                          |                                                        |
| <b>855</b> | ajubractin A | H                      | H           | MeBuO           | <i>Ajuga bracteosa</i>   | <i>J. Nat. Prod.</i> , 2011, <b>74</b> , 1036-<br>1041 |
| <b>856</b> | ajubractin B | H                      | H           | iBuO            |                          |                                                        |
| <b>857</b> | ajugapitin   | H                      | $\alpha$ OH | MeBuO           |                          |                                                        |
| <b>858</b> | areptin B    | $\beta$ OTig           | H           | OH              | <i>Ajuga reptans</i>     | <i>Phytochemistry</i> , 1998, <b>49</b> ,              |
| <b>859</b> | 14,15-       | $\beta$ Y <sub>1</sub> | H           | OH              |                          | <i>Phytochemistry</i> , 1998, <b>47</b> ,              |

### AMOORA Genus

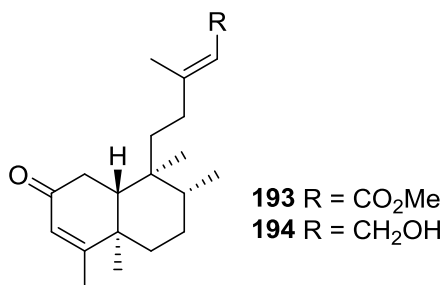

|            |                                                         |                           |                                                          |
|------------|---------------------------------------------------------|---------------------------|----------------------------------------------------------|
| <b>193</b> | methyl(13 <i>E</i> )-2-oxo-neocleroda-3,13-dien-15-oate | <i>Amoora yunnanensis</i> | <i>Helv. Chim. Acta</i> , 2004,<br><b>87</b> , 1279-1286 |
| <b>194</b> | (13 <i>E</i> )-2-oxoneocleroda-3,13-dien-15-ol          |                           |                                                          |



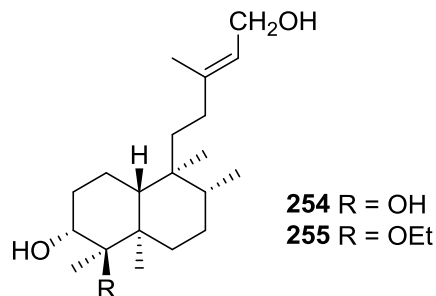

|            |                                                                         |                                |                                                       |
|------------|-------------------------------------------------------------------------|--------------------------------|-------------------------------------------------------|
| <b>254</b> | 3 $\alpha$ ,4 $\beta$ ,13 <i>E</i> -neoclerod-13-ene-3,4,15-triol       | <i>Amoora stellatosquamosa</i> | <i>Helv. Chim. Acta</i> , 2004, <b>87</b> , 1279-1286 |
| <b>255</b> | 3 $\alpha$ ,4 $\beta$ ,13 <i>E</i> -4-ethoxy-neoclerod-13-ene-3,15-diol |                                |                                                       |

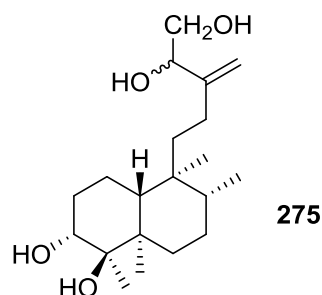

|            |                                                                               |                                |                                                       |
|------------|-------------------------------------------------------------------------------|--------------------------------|-------------------------------------------------------|
| <b>275</b> | (3 $\alpha$ ,4 $\beta$ -14 <i>RS</i> )-neo-clerod-13(16)-ene-3,4,14,15-tetrol | <i>Amoora stellatosquamosa</i> | <i>Helv. Chim. Acta</i> , 2004, <b>87</b> , 1279-1286 |
|------------|-------------------------------------------------------------------------------|--------------------------------|-------------------------------------------------------|

### AMPHIACHYRIS Genus

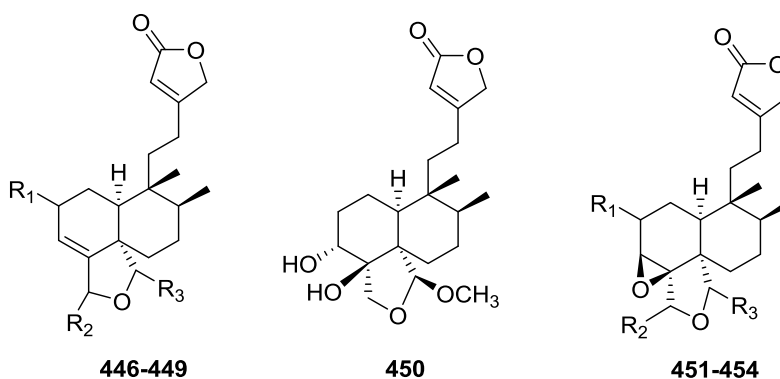

|            |                 |            |              |             |                                    |                                                                                                                                                         |
|------------|-----------------|------------|--------------|-------------|------------------------------------|---------------------------------------------------------------------------------------------------------------------------------------------------------|
| <b>446</b> | amphiacrolide A | H          | H            | =O          | <i>Amphiachyris dracunculoides</i> | <i>J. Nat. Prod.</i> , 1990, <b>53</b> , 1312-1326<br><i>J. Nat. Prod.</i> , 1996, <b>59</b> , 463-468<br><i>J. Nat. Prod.</i> , 1996, <b>59</b> , 5-14 |
| <b>447</b> | amphiacrolide B | H          | =O           | H           |                                    |                                                                                                                                                         |
| <b>448</b> | amphiacrolide C | H          | H            | OH          |                                    |                                                                                                                                                         |
| <b>449</b> | amphiacrolide L | $\beta$ OH | =O           | H           |                                    |                                                                                                                                                         |
| <b>450</b> | amphiacrolide J | —          | —            | —           |                                    |                                                                                                                                                         |
| <b>451</b> | amphiacrolide D | H          | H            | OH          |                                    |                                                                                                                                                         |
| <b>452</b> | amphiacrolide M | $\beta$ OH | H            | $\beta$ OH  |                                    |                                                                                                                                                         |
| <b>453</b> | amphiacrolide E | H          | $\alpha$ OEt | $\alpha$ OH |                                    |                                                                                                                                                         |

|     |                 |   |              |             |  |  |
|-----|-----------------|---|--------------|-------------|--|--|
| 454 | amphiacrolide I | H | $\alpha$ OMe | $\alpha$ OH |  |  |
|-----|-----------------|---|--------------|-------------|--|--|

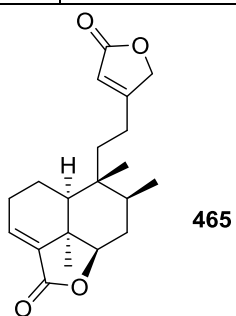

|     |                 |                                    |                                               |  |  |  |
|-----|-----------------|------------------------------------|-----------------------------------------------|--|--|--|
| 465 | amphiacrolide F | <i>Amphiachyris dracunculoides</i> | <i>J. Nat. Prod.</i> , 1996, <b>59</b> , 5-14 |  |  |  |
|-----|-----------------|------------------------------------|-----------------------------------------------|--|--|--|

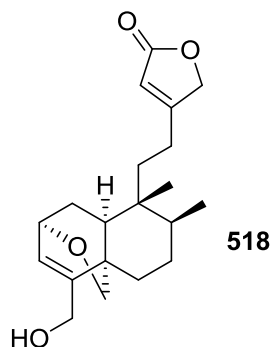

|     |                 |                                    |                                                  |  |  |  |
|-----|-----------------|------------------------------------|--------------------------------------------------|--|--|--|
| 518 | amphiacrolide K | <i>Amphiachyris dracunculoides</i> | <i>J. Nat. Prod.</i> , 1996, <b>59</b> , 463-468 |  |  |  |
|-----|-----------------|------------------------------------|--------------------------------------------------|--|--|--|

**AMPHIACHYRIS Genus**

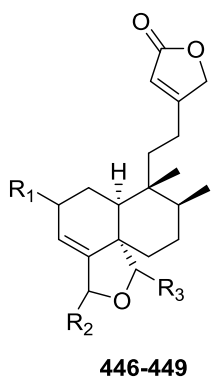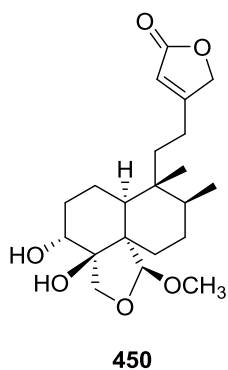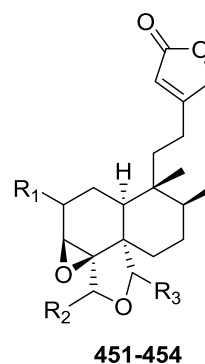

|     |                 |            |    |    |                                    |                                                    |
|-----|-----------------|------------|----|----|------------------------------------|----------------------------------------------------|
| 446 | amphiacrolide A | H          | H  | =O | <i>Amphiachyris dracunculoides</i> | <i>J. Nat. Prod.</i> , 1990, <b>53</b> , 1312-1326 |
| 447 | amphiacrolide B | H          | =O | H  |                                    | <i>J. Nat. Prod.</i> , 1996, <b>59</b> , 463-468   |
| 448 | amphiacrolide C | H          | H  | OH |                                    | <i>J. Nat. Prod.</i> , 1996, <b>59</b> , 5-14      |
| 449 | amphiacrolide L | $\beta$ OH | =O | H  |                                    |                                                    |

|     |                 |            |              |             |  |  |
|-----|-----------------|------------|--------------|-------------|--|--|
| 450 | amphiacrolide J | —          | —            | —           |  |  |
| 451 | amphiacrolide D | H          | H            | OH          |  |  |
| 452 | amphiacrolide M | $\beta$ OH | H            | $\beta$ OH  |  |  |
| 453 | amphiacrolide E | H          | $\alpha$ OEt | $\alpha$ OH |  |  |
| 454 | amphiacrolide I | H          | $\alpha$ OMe | $\alpha$ OH |  |  |

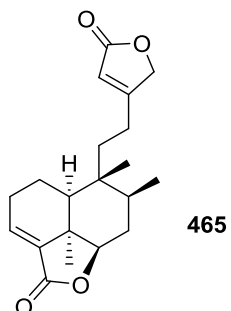

|            |                 |                                    |                                               |
|------------|-----------------|------------------------------------|-----------------------------------------------|
| <b>465</b> | amphiacrolide F | <i>Amphiachyris dracunculoides</i> | <i>J. Nat. Prod.</i> , 1996, <b>59</b> , 5-14 |
|------------|-----------------|------------------------------------|-----------------------------------------------|

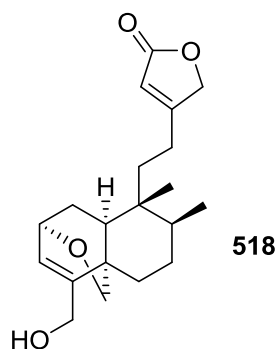

|            |                 |                                    |                                                  |
|------------|-----------------|------------------------------------|--------------------------------------------------|
| <b>518</b> | amphiacrolide K | <i>Amphiachyris dracunculoides</i> | <i>J. Nat. Prod.</i> , 1996, <b>59</b> , 463-468 |
|------------|-----------------|------------------------------------|--------------------------------------------------|

**APARISTHIUM Genus**

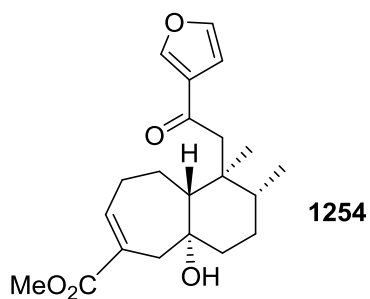

|             |             |                             |                                                |
|-------------|-------------|-----------------------------|------------------------------------------------|
| <b>1254</b> | aparisthman | <i>Aparisthium cordatum</i> | <i>Phytomedicine</i> , 2001, <b>8</b> , 94-100 |
|-------------|-------------|-----------------------------|------------------------------------------------|

**AUSTRODORIS Genus**

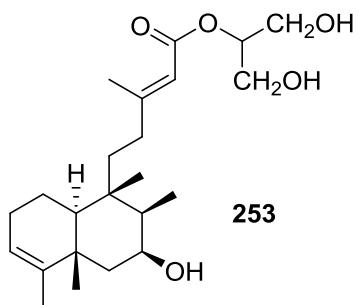

|            |              |                                   |                                                  |
|------------|--------------|-----------------------------------|--------------------------------------------------|
| <b>253</b> | palmadorin C | <i>Austrodoris kerguelenensis</i> | <i>J. Nat. Prod.</i> , 2010, <b>73</b> , 416–421 |
|------------|--------------|-----------------------------------|--------------------------------------------------|

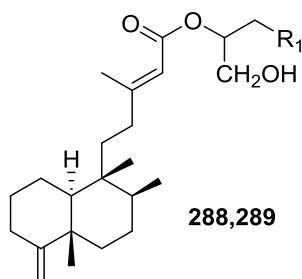

|            |              |     |                                   |                                                  |
|------------|--------------|-----|-----------------------------------|--------------------------------------------------|
| <b>288</b> | palmadorin A | OH  | <i>Austrodoris kerguelenensis</i> | <i>J. Nat. Prod.</i> , 2010, <b>73</b> , 416–421 |
| <b>289</b> | palmadorin B | OAc |                                   |                                                  |

**BACCHARIS Genus**

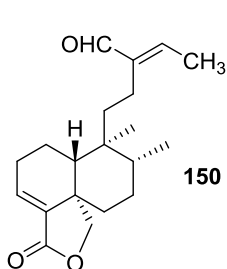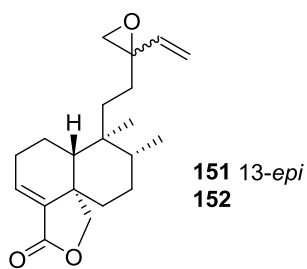

|            |                               |                           |                                                     |
|------------|-------------------------------|---------------------------|-----------------------------------------------------|
| <b>150</b> | baclinal                      | <i>Baccharis linearis</i> | <i>Phytochemistry</i> , 1996, <b>41</b> , 1123-1127 |
| <b>151</b> | 13- <i>epi</i> -baclinepoxide |                           |                                                     |
| <b>152</b> | baclinepoxide                 |                           |                                                     |

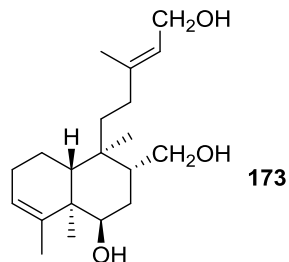

|            |             |                            |                                                        |
|------------|-------------|----------------------------|--------------------------------------------------------|
| <b>173</b> | platypodiol | <i>Baccharis platypoda</i> | <i>Tetrahedron Lett.</i> , 2014, <b>55</b> , 4898-4900 |
|------------|-------------|----------------------------|--------------------------------------------------------|

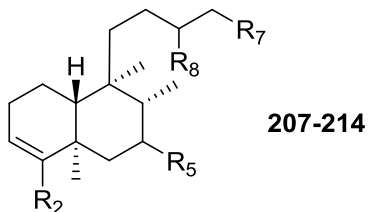

|            |                                                   | R2                      | R5  | R7                  | R8                  |                                 |                                                         |
|------------|---------------------------------------------------|-------------------------|-----|---------------------|---------------------|---------------------------------|---------------------------------------------------------|
| <b>207</b> | trinerdiol                                        | CH <sub>2</sub> OH      | H   | CH <sub>2</sub> OH  | Me                  | <i>Baccharis trinervis</i>      | <i>Phytochemistry</i> ,<br>1993, <b>34</b> , 1377-1384  |
| <b>208</b> | 15-acetyl-trinerdiol                              | CH <sub>2</sub> OH      | H   | CH <sub>2</sub> OAc | Me                  |                                 |                                                         |
| <b>209</b> | 18-acetyl-trinerdiol                              | CH <sub>2</sub> OAc     | H   | CH <sub>2</sub> OH  | Me                  |                                 |                                                         |
| <b>210</b> | 18-methylmalonyl-trinerdiol                       | CH <sub>2</sub> OMe-Mal | H   | CH <sub>2</sub> OH  | Me                  |                                 |                                                         |
| <b>211</b> | 15,18-diacetyl-trinertriol                        | CH <sub>2</sub> OAc     | H   | CH <sub>2</sub> OAc | CH <sub>2</sub> OH  |                                 |                                                         |
| <b>212</b> | 14,15,18-triacetyl-trinertetrol                   | CH <sub>2</sub> OAc     | αOH | CH <sub>2</sub> OAc | CH <sub>2</sub> OAc |                                 |                                                         |
| <b>213</b> | 15,16-diacetyl-trinertriol                        | CH <sub>2</sub> OH      | H   | CH <sub>2</sub> OAc | CH <sub>2</sub> OAc |                                 |                                                         |
| <b>214</b> | 15-hydroxy-16-acetoxy-ent-clerod-3-en-18-oic acid | CO <sub>2</sub> H       | H   | CH <sub>2</sub> OH  | CH <sub>2</sub> OAc | <i>Baccharis gaudichaudiana</i> | <i>Chem Pharm Bull</i> ,<br>2007, <b>55</b> , 1532-1534 |

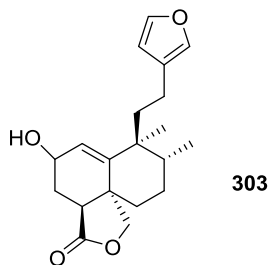

|            |               |                                 |                                                  |
|------------|---------------|---------------------------------|--------------------------------------------------|
| <b>303</b> | gaudichaudone | <i>Baccharis gaudichaudiana</i> | <i>J. Nat. Prod.</i> , 1994, <b>57</b> , 801-807 |
|------------|---------------|---------------------------------|--------------------------------------------------|

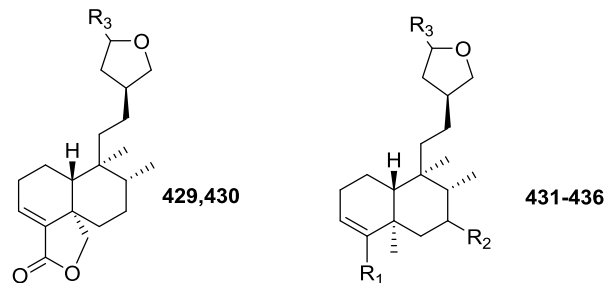

|     |                                                                                       | R1                       | R2          | R3           |                                 |                                                     |
|-----|---------------------------------------------------------------------------------------|--------------------------|-------------|--------------|---------------------------------|-----------------------------------------------------|
| 429 | trinerolide                                                                           | —                        | —           | $\alpha$ OMe | <i>Baccharis trinervis</i>      | <i>Phytochemistry</i> , 1993, <b>34</b> , 1377-1384 |
| 430 | 15-epitrinerolide                                                                     | —                        | —           | $\beta$ OMe  |                                 |                                                     |
| 431 | 18-acetyl-7 $\alpha$ -hydroxy-epimethyltrineracetel                                   | CH <sub>2</sub> OAc      | $\alpha$ OH | $\beta$ OMe  |                                 |                                                     |
| 432 | 18-methylmalonyl-7 $\alpha$ -hydroxy-methyltrineracetel                               | CH <sub>2</sub> OMe-malo | $\alpha$ OH | $\alpha$ OMe |                                 |                                                     |
| 433 | 18-methylmalonyl-7 $\alpha$ -hydroxy-epimethyltrineracetel                            | CH <sub>2</sub> OMe-malo | $\alpha$ OH | $\beta$ OMe  | <i>Baccharis articulata</i>     | <i>Phytochemistry</i> , 1993, <b>34</b> , 1087-1090 |
| 434 | 15,16-epoxy-7 $\alpha$ ,18-dihydroxy-15-methoxy- <i>ent</i> -clerod-3-ene             | CH <sub>2</sub> OH       | $\alpha$ OH | OMe          |                                 |                                                     |
| 435 | 15,16-epoxy-15 $\alpha$ -methoxy- <i>ent</i> -clerod-3-en-18-oic acid                 | COOH                     | H           | $\alpha$ OMe | <i>Baccharis gaudichaudiana</i> | <i>J. Nat. Prod.</i> , 2006, <b>69</b> , 274-276    |
| 436 | 13- <i>epi</i> -15,16-epoxy-15 $\alpha$ -methoxy- <i>ent</i> -clerod-3-en-18-oic acid | COOH                     | H           | $\beta$ OMe  |                                 |                                                     |

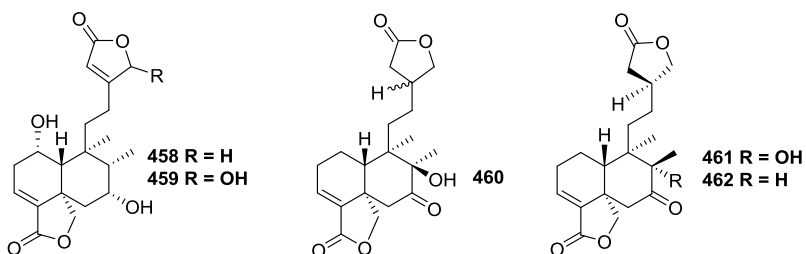

|     |                                                                               |                                 |                                                     |
|-----|-------------------------------------------------------------------------------|---------------------------------|-----------------------------------------------------|
| 458 | 1 $\alpha$ ,7 $\alpha$ -dihydroxyneocleroda-3,13-dien-16,15:18,19-diolide     | <i>Baccharis crispa</i>         | <i>J. Nat. Prod.</i> , 1997, <b>60</b> , 490-492    |
| 459 | 1 $\alpha$ ,7 $\alpha$ ,15-trihydroxyneocleroda-3,13-dien-16,15:18,19-diolide |                                 |                                                     |
| 460 | 8 $\beta$ -hydroxy-7-oxo- <i>ent</i> -cleroda-3-en-15,18-dilactone            | <i>Baccharis articulata</i>     | <i>Phytochemistry</i> , 1993, <b>34</b> , 1087-1090 |
| 461 | gaudichanolide A                                                              | <i>Baccharis gaudichaudiana</i> | <i>J. Nat. Prod.</i> , 2005, <b>68</b> , 1121-1124  |
| 462 | gaudichanolide B                                                              |                                 |                                                     |

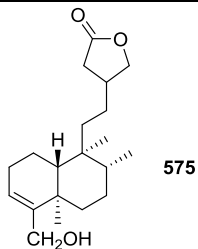

|            |                |                            |                                                     |
|------------|----------------|----------------------------|-----------------------------------------------------|
| <b>575</b> | trinerolactone | <i>Baccharis trinervis</i> | <i>Phytochemistry</i> , 1993, <b>34</b> , 1377-1384 |
|------------|----------------|----------------------------|-----------------------------------------------------|

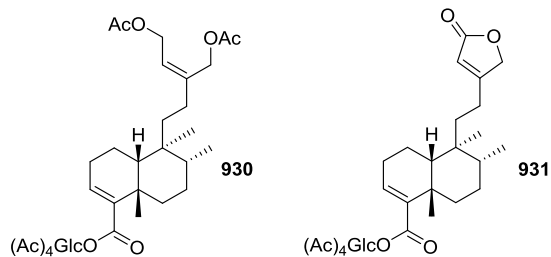

|            |                                                                                                                         |                             |                                                   |
|------------|-------------------------------------------------------------------------------------------------------------------------|-----------------------------|---------------------------------------------------|
| <b>930</b> | <i>cis</i> -cleroda-15,16-dihydroxy-3,13( <i>Z</i> )-dien-18- <i>O</i> -[ $\beta$ -D-galacto-pyranosyl]-peracetyylester | <i>Baccharis sagittalis</i> | <i>Phytochemistry</i> , 2002, <b>61</b> , 899-905 |
| <b>931</b> | <i>cis</i> -cleroda-3,13(14)-dien-15,16-olide-18- <i>O</i> -[ $\beta$ -D-galacto-pyranosyl]-peracetyylester             |                             |                                                   |

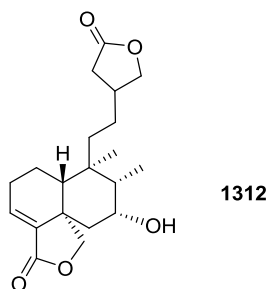

|             |    |                          |                                                   |
|-------------|----|--------------------------|---------------------------------------------------|
| <b>1312</b> | -- | <i>Baccharis trimeta</i> | <i>Phytochemistry</i> , 2000, <b>55</b> , 617-619 |
|-------------|----|--------------------------|---------------------------------------------------|

### **BALLOTA Genus**

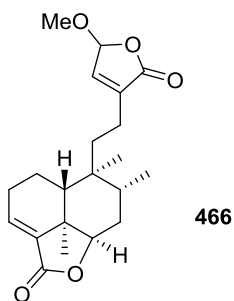

|            |                 |                        |                                                     |
|------------|-----------------|------------------------|-----------------------------------------------------|
| <b>466</b> | ballatenolide A | <i>Ballota limbata</i> | <i>Helv. Chim. Acta</i> , 2004, <b>87</b> , 682-689 |
|------------|-----------------|------------------------|-----------------------------------------------------|

**BARRINGTONIA Genus**

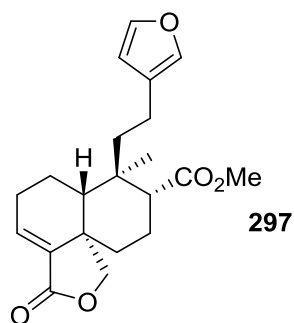

|            |             |                              |                                                  |
|------------|-------------|------------------------------|--------------------------------------------------|
| <b>297</b> | nasimalun A | <i>Barringtonia racemosa</i> | <i>J. Nat. Prod.</i> , 2000, <b>63</b> , 410-411 |
|------------|-------------|------------------------------|--------------------------------------------------|

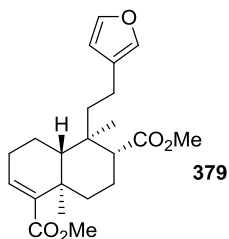

|            |             |                              |                                                  |
|------------|-------------|------------------------------|--------------------------------------------------|
| <b>379</b> | nasimalun B | <i>Barringtonia racemosa</i> | <i>J. Nat. Prod.</i> , 2000, <b>63</b> , 410-411 |
|------------|-------------|------------------------------|--------------------------------------------------|

**BRAZILIAN PROPOLIS**

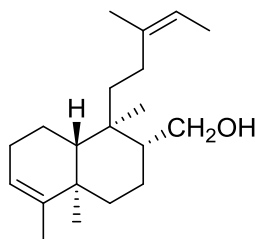

|            |       |                           |                                                      |
|------------|-------|---------------------------|------------------------------------------------------|
| <b>203</b> | PMS-1 | <i>Brazilian propolis</i> | <i>Anticancer Res.</i> , 1996, <b>16</b> , 2669-2672 |
|------------|-------|---------------------------|------------------------------------------------------|



**BUCIDA Genus**

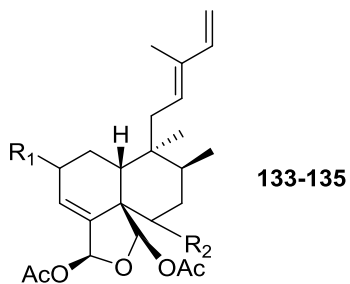

|     |               | R1                     | R2         |                       |                                                             |
|-----|---------------|------------------------|------------|-----------------------|-------------------------------------------------------------|
| 133 | bucidasarin A | $\beta$ OiBu           | $\beta$ OH | <i>Bucida buceras</i> | <i>Bioorg. Med. Chem. Lett.</i> , 2002, <b>12</b> , 345-348 |
| 134 | bucidasarin B | $\beta$ Y <sub>1</sub> | $\beta$ OH |                       |                                                             |
| 135 | bucidasarin C | $\beta$ OiBu           | H          |                       |                                                             |

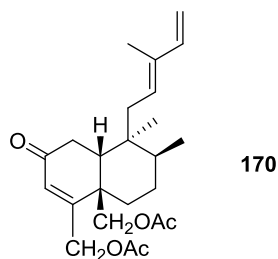

|     |               |                       |                                                             |
|-----|---------------|-----------------------|-------------------------------------------------------------|
| 170 | bucidasarin D | <i>Bucida buceras</i> | <i>Bioorg. Med. Chem. Lett.</i> , 2002, <b>12</b> , 345-348 |
|-----|---------------|-----------------------|-------------------------------------------------------------|

**CALLICARPA Genus**

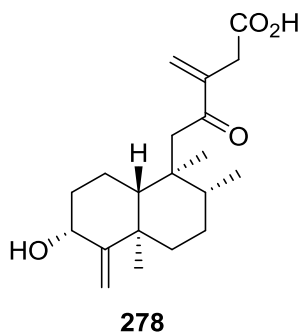

|     |                      |                             |                                                    |
|-----|----------------------|-----------------------------|----------------------------------------------------|
| 278 | pentandranoic acid C | <i>Callicarpa pentandra</i> | <i>J. Nat. Prod.</i> , 2000, <b>63</b> , 1062-1065 |
|-----|----------------------|-----------------------------|----------------------------------------------------|

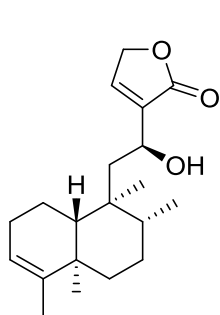

535

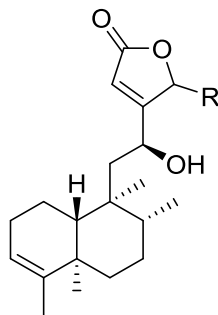

536-538

|     |                                                                         |     |                             |                                                  |
|-----|-------------------------------------------------------------------------|-----|-----------------------------|--------------------------------------------------|
| 535 | 12( <i>S</i> )-hydroxycleroda-3,13-dien-16,15-olide                     | H   | <i>Callicarpa americana</i> | <i>J. Nat. Prod.</i> , 2007, <b>70</b> , 372-377 |
| 536 | 12( <i>S</i> ),16 $\zeta$ -dihydroxycleroda-3,13-dien-15,16-olide       | OH  |                             |                                                  |
| 537 | 12( <i>S</i> )-hydroxy-16 $\zeta$ -methoxycleroda-3,13-dien-15,16-olide | OMe |                             |                                                  |
| 538 | 12( <i>S</i> )-hydroxycleroda-3,13-dien-15,16-olide                     | H   |                             |                                                  |

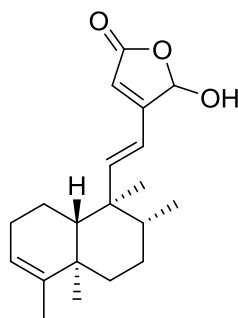

576

|     |                                                                  |                             |                                                  |
|-----|------------------------------------------------------------------|-----------------------------|--------------------------------------------------|
| 576 | 16 $\zeta$ -hydroxycleroda-3,11( <i>E</i> ),13-trien-15,16-olide | <i>Callicarpa americana</i> | <i>J. Nat. Prod.</i> , 2007, <b>70</b> , 372-377 |
|-----|------------------------------------------------------------------|-----------------------------|--------------------------------------------------|

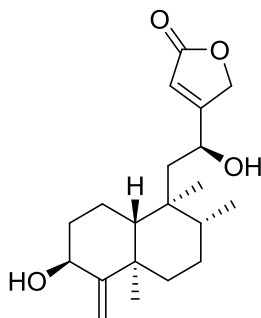

596

|     |                                                                        |                             |                                                  |
|-----|------------------------------------------------------------------------|-----------------------------|--------------------------------------------------|
| 595 | 3 $\alpha$ ,12( <i>S</i> )-dihydroxy-cleroda-4(18),13-dien-15,16-olide | <i>Callicarpa americana</i> | <i>J. Nat. Prod.</i> , 2007, <b>70</b> , 372-377 |
|-----|------------------------------------------------------------------------|-----------------------------|--------------------------------------------------|

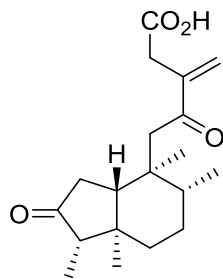

**1055**

|             |                     |                             |                                                    |
|-------------|---------------------|-----------------------------|----------------------------------------------------|
| <b>1055</b> | pentandranic acid B | <i>Callicarpa pentandra</i> | <i>J. Nat. Prod.</i> , 2000, <b>63</b> , 1062-1065 |
|-------------|---------------------|-----------------------------|----------------------------------------------------|

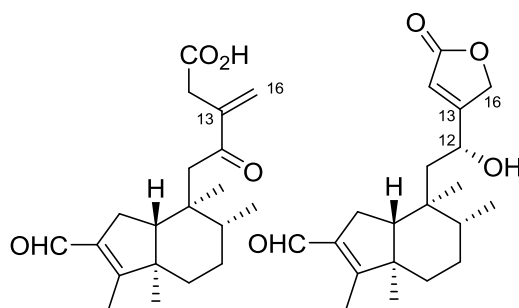

**1153**

**1154**

|             |                     |                             |                                                    |
|-------------|---------------------|-----------------------------|----------------------------------------------------|
| <b>1153</b> | pentandranic acid A | <i>Callicarpa pentandra</i> | <i>J. Nat. Prod.</i> , 2000, <b>63</b> , 1062-1065 |
| <b>1154</b> | pentandralactone    |                             |                                                    |

**CAREX Genus**

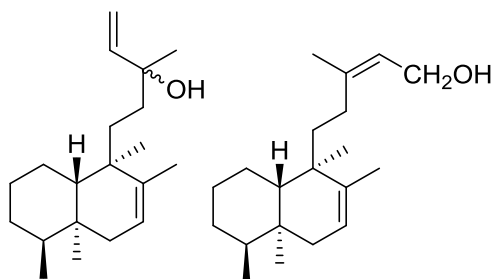

**270**

**271**

|            |                                   |                        |                                                        |
|------------|-----------------------------------|------------------------|--------------------------------------------------------|
| <b>270</b> | 13-hydroxycyclocleroda-7,14-diene | <i>Carex distachya</i> | <i>Nat. Prod. Commun.</i> , 2010, <b>5</b> , 1539-1542 |
| <b>271</b> | 15-hydroxycyclocleroda-7,13-diene |                        |                                                        |

**CASEARIA Genus**

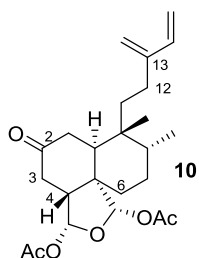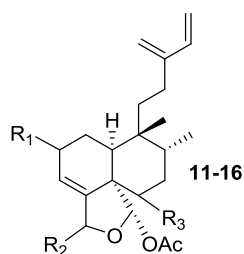

|           |              | R1                      | R2           | R3           |                          |                                                    |
|-----------|--------------|-------------------------|--------------|--------------|--------------------------|----------------------------------------------------|
| <b>10</b> | balanspene A | —                       | —            | —            | <i>Casearia balansae</i> | <i>J. Nat. Prod.</i> , 2014, <b>77</b> , 2182–2189 |
| <b>11</b> | balanspene B | =O                      | $\alpha$ OBu | H            |                          |                                                    |
| <b>12</b> | balanspene C | $\alpha$ Y <sub>1</sub> | $\alpha$ OBu | H            |                          |                                                    |
| <b>13</b> | balanspene D | $\alpha$ OBu            | $\alpha$ OBu | $\alpha$ OMe |                          |                                                    |
| <b>14</b> | balanspene E | $\alpha$ Y <sub>1</sub> | $\alpha$ OBu | $\alpha$ OMe |                          |                                                    |
| <b>15</b> | balanspene F | $\alpha$ Y <sub>1</sub> | $\alpha$ OMe | $\alpha$ OMe |                          |                                                    |
| <b>16</b> | balanspene G | $\beta$ OAc             | $\alpha$ OMe | $\alpha$ OMe |                          |                                                    |

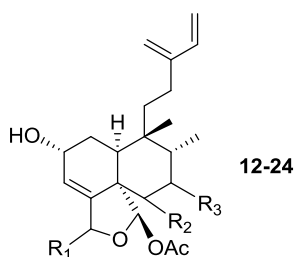

|           |                  | R1           | R2                      | R3                     |                           |                                                |
|-----------|------------------|--------------|-------------------------|------------------------|---------------------------|------------------------------------------------|
| <b>21</b> | casearupestrin A | $\alpha$ OAc | $\alpha$ X <sub>1</sub> | $\beta$ OH             | <i>Casearia rupestris</i> | <i>J. Nat. Prod.</i> , 2011, <b>74</b> 776–781 |
| <b>22</b> | casearupestrin B | $\alpha$ OAc | $\alpha$ OH             | $\beta$ X <sub>1</sub> |                           |                                                |
| <b>23</b> | casearupestrin C | $\alpha$ OMe | $\alpha$ OH             | $\beta$ X <sub>1</sub> |                           |                                                |
| <b>24</b> | casearupestrin D | $\alpha$ OAc | $\alpha$ OAc            | $\beta$ X <sub>1</sub> |                           |                                                |

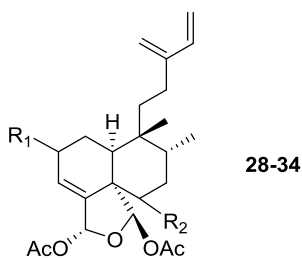

|           |                                                                             | R1                      | R2           |                           |                                                     |
|-----------|-----------------------------------------------------------------------------|-------------------------|--------------|---------------------------|-----------------------------------------------------|
| <b>28</b> | <i>ent</i> -6 $\beta$ -hydroxy-isozuelanin-2 $\beta$ -(2-methyl)butanoate   | $\alpha$ Y <sub>1</sub> | $\alpha$ OH  | <i>Casearia corymbosa</i> | <i>Phytochemistry</i> , 1990, <b>29</b> , 3591-3595 |
| <b>29</b> | <i>ent</i> -6 $\beta$ -methoxy-isozuelanin-2 $\beta$ -(2-methyl)butanoate   | $\alpha$ Y <sub>1</sub> | $\alpha$ OMe |                           |                                                     |
| <b>30</b> | <i>ent</i> -2 $\beta$ -(2-methyl)butoxy-3,4-dihydro-4 $\alpha$ -isozuelanin | $\alpha$ Y <sub>1</sub> | H            |                           |                                                     |

|    |                                                                            |               |              |  |  |
|----|----------------------------------------------------------------------------|---------------|--------------|--|--|
| 31 | <i>ent</i> -6 $\beta$ -hydroxy-isozuelanin-2 $\beta$ -(2-methyl)propanoate | $\alpha$ OiBu | $\alpha$ OH  |  |  |
| 32 | <i>ent</i> -6 $\beta$ -methoxy-isozuelanin-2 $\beta$ -(2-methyl)propanoate | $\alpha$ OiBu | $\alpha$ OMe |  |  |
| 33 | <i>ent</i> -2 $\beta$ -hydroxy-3,4-dihydro-4 $\alpha$ -isozuelanin         | $\alpha$ OH   | H            |  |  |
| 34 | <i>ent</i> -2 $\beta$ -acetoxy-3,4-dihydro-4 $\alpha$ -isozuelanin         | $\alpha$ OAc  | H            |  |  |

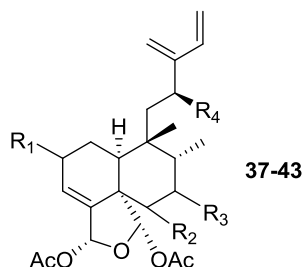

|    |                  | R1                      | R2             | R3          | R4  |                            |                                                    |
|----|------------------|-------------------------|----------------|-------------|-----|----------------------------|----------------------------------------------------|
| 37 | caseanigrescen A | $\alpha$ OBu            | $\alpha$ OH    | $\beta$ OAc | H   | <i>Casearia nigrescens</i> | <i>J. Nat. Prod.</i> , 2007, <b>70</b> , 206-209   |
| 38 | caseanigrescen B | $\alpha$ OBu            | $\alpha$ OH    | $\beta$ OH  | H   |                            |                                                    |
| 39 | caseanigrescen C | $\alpha$ OBu            | $\alpha$ OAc   | $\beta$ OH  | H   |                            |                                                    |
| 40 | caseanigrescen D | $\alpha$ OBu            | $\alpha$ OH    | H           | H   |                            |                                                    |
| 41 | argutin F        | $\alpha$ X <sub>1</sub> | OH             | $\beta$ H   | OOH | <i>Casearia arguta</i>     | <i>J. Nat. Prod.</i> , 2010, <b>73</b> , 2013-2018 |
| 42 | argutin G        | $\alpha$ X <sub>1</sub> | OH             | $\beta$ OH  | OOH |                            |                                                    |
| 43 | argutin H        | $\alpha$ OH             | X <sub>1</sub> | $\beta$ OH  | OOH |                            |                                                    |

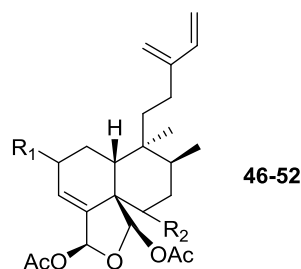

|    |                                                                                                                                                                                                                        | R1                     | R2          |                         |                                                   |
|----|------------------------------------------------------------------------------------------------------------------------------------------------------------------------------------------------------------------------|------------------------|-------------|-------------------------|---------------------------------------------------|
| 46 | <i>rel</i> -18( <i>S</i> ),19( <i>R</i> )-diacetoxy-18,19-epoxy-6( <i>R</i> )-methoxy-2( <i>S</i> )-(2 $\zeta$ -methylbutanoyloxy)-5( <i>R</i> ),8( <i>S</i> ),9( <i>S</i> ),10( <i>R</i> )-cleroda-3,13(16),14-triene | $\beta$ Y <sub>1</sub> | $\beta$ OMe | <i>Casearia tremula</i> | <i>Phytochemistry</i> , 1996, <b>41</b> , 565-570 |
| 47 | <i>rel</i> -18( <i>S</i> ),19( <i>R</i> )-diacetoxy-18,19-epoxy-2( <i>S</i> )-(2 $\zeta$ -methylbutanoyloxy)-5( <i>R</i> ),8( <i>S</i> ),9( <i>S</i> ),10( <i>R</i> )-cleroda-3,13(16),14-triene                       | $\beta$ Y <sub>1</sub> | $\beta$ H   |                         |                                                   |
| 48 | <i>rel</i> -18( <i>S</i> ),19( <i>R</i> )-diacetoxy-18,19-epoxy-6( <i>R</i> )-hydroxy-2( <i>S</i> )-(2 $\zeta$ -methylbutanoyloxy)-5( <i>R</i> ),8( <i>S</i> ),9( <i>S</i> ),10( <i>R</i> )-cleroda-3,13(16),14-triene | $\beta$ Y <sub>1</sub> | $\beta$ OH  |                         |                                                   |
| 49 | <i>rel</i> -18( <i>S</i> ),19( <i>R</i> )-diacetoxy-18,19-epoxy-6( <i>R</i> )-hydroxy-2( <i>S</i> )-undecanoyloxy-5( <i>R</i> ),8( <i>S</i> ),9( <i>S</i> ),10( <i>R</i> )-cleroda-3,13(16),14-triene                  | $\beta$ X <sub>2</sub> | $\beta$ OH  |                         |                                                   |
| 50 | <i>rel</i> -18( <i>S</i> ),19( <i>R</i> )-diacetoxy-18,19-epoxy-6( <i>R</i> )-hydroxy-2( <i>S</i> )-octanoyloxy-5( <i>R</i> ),8( <i>S</i> ),9( <i>S</i> ),10( <i>R</i> )-cleroda-                                      | $\beta$ OOct           | $\beta$ OH  |                         |                                                   |

|           |                                                                                                                                                                                                                         |              |            |  |  |
|-----------|-------------------------------------------------------------------------------------------------------------------------------------------------------------------------------------------------------------------------|--------------|------------|--|--|
|           | 3,13(16),14-triene                                                                                                                                                                                                      |              |            |  |  |
| <b>51</b> | <i>rel</i> -18( <i>S</i> ),19( <i>R</i> )-diacetoxy-18,19-epoxy-6( <i>R</i> )-hydroxy-2( <i>S</i> )-(3 $\zeta$ -hydroxyoctanoyloxy)-5( <i>R</i> ),8( <i>S</i> ),9( <i>S</i> ),10( <i>R</i> )-cleroda-3,13(16),14-triene | $\beta X_3$  | $\beta OH$ |  |  |
| <b>52</b> | <i>rel</i> -18( <i>S</i> ),19( <i>R</i> )-diacetoxy-18,19-epoxy-2( <i>R</i> )-hexanoyloxy-5( <i>R</i> ),8( <i>S</i> ),9( <i>S</i> ),10( <i>R</i> )-cleroda-3,13(16),14-triene                                           | $\alpha X_4$ | H          |  |  |

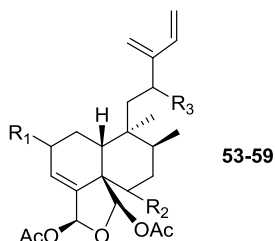

|           |               | R1           | R2          | R3          |                        |                                                  |
|-----------|---------------|--------------|-------------|-------------|------------------------|--------------------------------------------------|
| <b>53</b> | casearlucin B | $\alpha OAc$ | $\beta OMe$ | H           | <i>Casearia lucida</i> | <i>J. Nat. Prod.</i> , 2002, <b>65</b> , 100-107 |
| <b>54</b> | casearlucin D | $\beta Y_1$  | $\beta OAc$ | H           |                        |                                                  |
| <b>55</b> | casearlucin H | $\beta Y_1$  | $\beta OH$  | $\alpha OH$ |                        |                                                  |
| <b>56</b> | casearlucin I | $\beta Y_1$  | $\beta OH$  | $\beta OH$  |                        |                                                  |
| <b>57</b> | casearlucin M | $\beta Y_1$  | $\beta OMe$ | H           |                        |                                                  |
| <b>58</b> | casearlucin J | $\alpha Y_1$ | $\beta OH$  | $\alpha OH$ |                        |                                                  |
| <b>59</b> | casearlucin K | $\alpha Y_1$ | $\beta OH$  | $\beta OH$  |                        |                                                  |

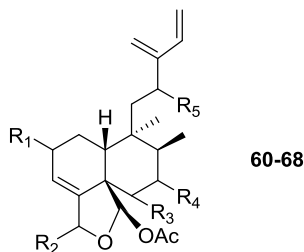

|           |                | R1           | R2          | R3          | R4          | R5         |                             |                                                       |
|-----------|----------------|--------------|-------------|-------------|-------------|------------|-----------------------------|-------------------------------------------------------|
| <b>60</b> | caseamembrin A | $\beta Y_1$  | $\beta OBU$ | $\beta OH$  | H           | H          | <i>Casearia membranacea</i> | <i>J. Nat. Prod.</i> , 2004, <b>67</b> , 316-321      |
| <b>61</b> | caseamembrin B | $\beta Y_1$  | $\beta OMe$ | $\beta OH$  | H           | H          |                             |                                                       |
| <b>62</b> | caseamembrin C | $\beta Y_1$  | $\beta OBU$ | $\beta OH$  | $\beta OH$  | H          |                             |                                                       |
| <b>63</b> | caseamembrin D | $\beta Y_1$  | $\beta OBU$ | $\beta OH$  | $\beta OAc$ | H          |                             | <i>J. Nat. Prod.</i> , 2005, <b>68</b> , 1665-1668    |
| <b>64</b> | caseamembrin E | $\alpha Y_1$ | $\beta OAc$ | $\beta OH$  | H           | H          |                             |                                                       |
| <b>65</b> | caseamembrin M | $\beta Y_1$  | $\beta OAc$ | $\beta OBU$ | H           | H          |                             |                                                       |
| <b>66</b> | caseamembrin N | $\beta Y_1$  | $\beta OAc$ | $\beta OH$  | $\beta OAc$ | H          |                             | <i>Chem. Pharm. Bull.</i> , 2004, <b>52</b> , 108-110 |
| <b>67</b> | caseamembrin O | $\beta Y_2$  | $\beta OAc$ | $\beta OH$  | $\beta OAc$ | H          |                             |                                                       |
| <b>68</b> | caseamembrol B | $\alpha Y_1$ | $\beta OAc$ | $\beta OH$  | H           | $\beta OH$ |                             |                                                       |

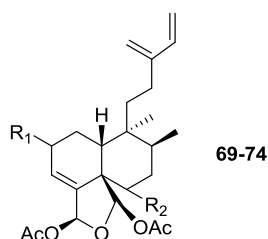

|    |                                                                                                                                                                                                   | R1                      | R2          |                             |                                                         |
|----|---------------------------------------------------------------------------------------------------------------------------------------------------------------------------------------------------|-------------------------|-------------|-----------------------------|---------------------------------------------------------|
| 69 | <i>rel</i> -2( <i>R</i> ),18( <i>S</i> ),19( <i>R</i> )-tri-acetoxy-18,19-epoxy-4( <i>S</i> ),5( <i>S</i> ),9( <i>S</i> ),10( <i>R</i> )-clerodan-13(16),14-dien-6-one                            | $\alpha$ OAc            | =O          | <i>Casearia grayi</i>       | <i>Nat. Prod. Commun.</i> , 2006, <b>1</b> , 441-448    |
| 70 | <i>rel</i> -2( <i>R</i> ),18( <i>S</i> ),19( <i>R</i> )-triacetoxy-18,19-epoxy-4( <i>S</i> ),5( <i>R</i> ),8( <i>S</i> ),9( <i>S</i> ),10( <i>R</i> )-clerodan-13(16),14-diene                    | $\alpha$ OAc            | H           |                             |                                                         |
| 71 | <i>rel</i> -18( <i>S</i> ),19( <i>R</i> )-diacetoxy-18,19-epoxy-2( <i>R</i> )-(2 $\zeta$ -methylbutanoyl)-4( <i>S</i> ),-5( <i>S</i> ),9( <i>S</i> ),10( <i>R</i> )-clerodan-13(16),14-dien-6-one | $\alpha$ Y <sub>1</sub> | =O          |                             | <i>Biochem. Syst. Ecol.</i> , 2007, <b>35</b> , 631-633 |
| 72 | <i>rel</i> -18( <i>S</i> ),19( <i>R</i> )-diacetoxy-18,19-epoxy-2( <i>R</i> )-isobutanoyl-4( <i>S</i> ),5( <i>R</i> ),9( <i>S</i> ),-10( <i>R</i> )-clerodan-13(16),14-diene                      | $\alpha$ OiBu           | H           |                             |                                                         |
| 73 | <i>rel</i> -18( <i>S</i> ),19( <i>R</i> )-diacetoxy-18,19-epoxy-2( <i>R</i> )-(2 $\zeta$ -methylbutanoyl)-4( <i>S</i> ),5( <i>R</i> ),9( <i>S</i> ),10( <i>R</i> )-clerodan-13(16),14-diene       | $\alpha$ Y <sub>1</sub> | H           |                             |                                                         |
| 74 | caseargrewiin A                                                                                                                                                                                   | $\beta$ Y <sub>2</sub>  | $\beta$ OMe | <i>Casearia grewiifolia</i> | <i>J. Nat. Prod.</i> , 2005, <b>68</b> , 183-188        |
| 76 | esculentin A                                                                                                                                                                                      | =O                      | H           | <i>Casearia esculenta</i>   | <i>Indian J. Chem.</i> , 2002, <b>41B</b> , 2706-2708   |

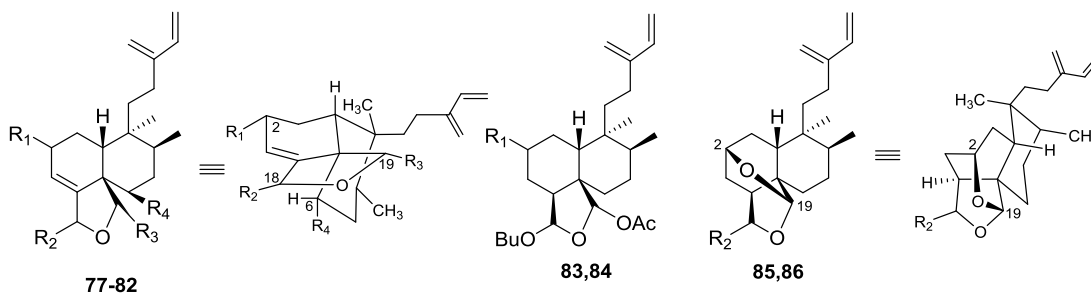

|    |                       |                        |             |     |     |                          |                                                    |
|----|-----------------------|------------------------|-------------|-----|-----|--------------------------|----------------------------------------------------|
| 77 | caseabalansin C       | $\alpha$ OAc           | OEt         | OAc | OMe | <i>Casearia balansae</i> | <i>J. Nat. Prod.</i> , 2013, <b>76</b> , 1573-1579 |
| 78 | 2-epicaseabalansin C  | $\beta$ OAc            | OEt         | OAc | OMe |                          |                                                    |
| 79 | caseabalansin D       | $\beta$ Y <sub>1</sub> | OEt         | OAc | OH  |                          |                                                    |
| 80 | caseabalansin E       | $\beta$ Y <sub>1</sub> | OMe         | OH  | OMe |                          |                                                    |
| 81 | caseabalansin F       | =O                     | OAc         | OAc | OMe |                          |                                                    |
| 82 | caseabalansin G       | =O                     | OBu         | OAc | OMe |                          |                                                    |
| 83 | caseabalansin B       | $\alpha$ OH            | —           | —   | —   |                          |                                                    |
| 84 | 2-epicaseabalansin B  | $\beta$ OH             | —           | —   | —   |                          |                                                    |
| 85 | caseabalansin A       | —                      | $\beta$ OH  | —   | —   |                          |                                                    |
| 86 | 18-epicaseabalansin A | —                      | $\alpha$ OH | —   | —   |                          |                                                    |

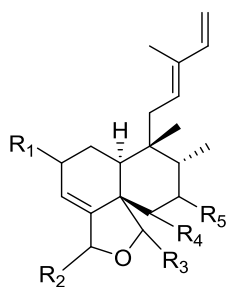

87-111

|     |                 | R1                      | R2           | R3           | R4                      | R5          |                             |                                                       |
|-----|-----------------|-------------------------|--------------|--------------|-------------------------|-------------|-----------------------------|-------------------------------------------------------|
| 87  | casearvestrin A | $\beta$ OiBu            | $\alpha$ OAc | $\alpha$ OAc | $\alpha$ OH             | H           | <i>Casearia sylvestris</i>  | <i>J. Nat. Prod.</i> , 2002, <b>65</b> , 95-99        |
| 88  | casearvestrin B | $\beta$ Y <sub>1</sub>  | $\alpha$ OAc | $\alpha$ OAc | $\alpha$ OH             | H           |                             |                                                       |
| 89  | casearvestrin C | $\beta$ X <sub>4</sub>  | $\alpha$ OAc | $\alpha$ OAc | $\alpha$ OH             | H           |                             |                                                       |
| 90  | argutin A       | $\alpha$ X <sub>1</sub> | $\alpha$ OAc | $\alpha$ OAc | OH                      | H           | <i>Casearia arguta</i>      | <i>J. Nat. Prod.</i> , 2010, <b>73</b> , 2013-2018    |
| 91  | argutin B       | $\alpha$ OH             | $\alpha$ OAc | $\alpha$ OAc | X <sub>1</sub>          | H           |                             |                                                       |
| 92  | argutin C       | $\alpha$ X <sub>1</sub> | $\alpha$ OAc | $\alpha$ OAc | OH                      | OH          |                             |                                                       |
| 93  | argutin D       | $\alpha$ OH             | $\alpha$ OAc | $\alpha$ OAc | X <sub>1</sub>          | OH          |                             |                                                       |
| 94  | argutin E       | $\alpha$ X <sub>1</sub> | $\alpha$ OAc | $\alpha$ OAc | H                       | OH          |                             |                                                       |
| 95  | esculentin B    | $\alpha$ Y <sub>2</sub> | $\beta$ OAc  | $\beta$ OAc  | $\beta$ OH              | $\alpha$ OH | <i>Casearia esculenta</i>   | <i>Indian J. Chem.</i> , 2002, <b>41B</b> , 2706-2708 |
| 96  | casearborin A   | $\alpha$ Z <sub>1</sub> | $\alpha$ OAc | $\alpha$ OAc | $\alpha$ H              | H           | <i>Casearia arborea</i>     | <i>J. Nat. Prod.</i> , 2000, <b>63</b> , 657-661      |
| 97  | casearborin B   | $\alpha$ Z <sub>2</sub> | $\alpha$ OAc | $\alpha$ OAc | $\alpha$ H              | H           |                             |                                                       |
| 98  | casearborin C   | $\alpha$ OH             | $\alpha$ OAc | $\alpha$ OAc | $\alpha$ Z <sub>1</sub> | H           |                             |                                                       |
| 99  | casearborin D   | $\alpha$ Z <sub>1</sub> | $\alpha$ OAc | $\alpha$ OAc | $\alpha$ OH             | H           |                             |                                                       |
| 100 | casearborin E   | $\alpha$ OAc            | $\alpha$ OAc | $\alpha$ OAc | $\alpha$ Z <sub>1</sub> | H           |                             |                                                       |
| 104 | caseargrewiin E | $\alpha$ OBu            | $\alpha$ OAc | $\alpha$ OAc | H                       | H           | <i>Casearia grewiifolia</i> | <i>J. Nat. Prod.</i> , 2007, <b>70</b> , 1122-1126    |
| 105 | caseargrewiin F | $\alpha$ OBu            | $\alpha$ OAc | $\alpha$ OAc | $\alpha$ OH             | H           |                             |                                                       |
| 106 | caseargrewiin G | $\alpha$ OBu            | $\alpha$ OMe | $\alpha$ OAc | $\alpha$ OH             | H           |                             |                                                       |
| 107 | caseargrewiin H | $\alpha$ X <sub>4</sub> | $\alpha$ OAc | $\alpha$ OAc | H                       | H           |                             |                                                       |
| 108 | caseargrewiin I | $\alpha$ X <sub>4</sub> | $\alpha$ OAc | $\alpha$ OAc | $\alpha$ OH             | H           |                             |                                                       |
| 109 | caseargrewiin J | $\alpha$ X <sub>4</sub> | $\alpha$ OMe | $\alpha$ OAc | $\alpha$ OH             | H           |                             |                                                       |
| 110 | caseargrewiin K | $\alpha$ X <sub>4</sub> | $\alpha$ OMe | $\alpha$ OAc | $\alpha$ OH             | $\beta$ OH  |                             |                                                       |
| 111 | caseargrewiin L | $\alpha$ Y <sub>2</sub> | $\alpha$ OAc | $\alpha$ OAc | $\alpha$ OH             | H           |                             |                                                       |

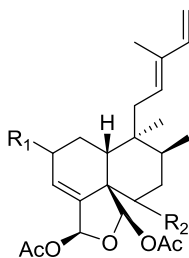

115-119, 127-128

|     |               | R1                     | R2         |                        |                                                  |
|-----|---------------|------------------------|------------|------------------------|--------------------------------------------------|
| 115 | casearlucin A | $\beta$ Y <sub>1</sub> | $\beta$ OH | <i>Casearia lucida</i> | <i>J. Nat. Prod.</i> , 2002, <b>65</b> , 100-107 |



|            |                |              |              |                             |                                                       |
|------------|----------------|--------------|--------------|-----------------------------|-------------------------------------------------------|
| <b>116</b> | casearlucin C  | $\beta Y_1$  | $\beta OAc$  |                             |                                                       |
| <b>117</b> | casearlucin F  | $\beta Y_1$  | H            |                             |                                                       |
| <b>118</b> | casearlucin G  | $\alpha Y_1$ | H            |                             |                                                       |
| <b>119</b> | caseamembrol A | $\alpha Y_1$ | $\beta OH$   | <i>Casearia membranacea</i> | <i>Chem. Pharm. Bull.</i> , 2004, <b>52</b> , 108-110 |
| <b>127</b> | caseobliquin A | $\alpha OAc$ | $\beta Z_1$  | <i>Casearia obliqua</i>     | <i>J. Nat. Prod.</i> , 2009, <b>72</b> , 1847-1850    |
| <b>128</b> | caseobliquin B | $\beta OAc$  | $\beta OCin$ |                             |                                                       |

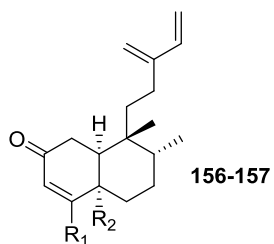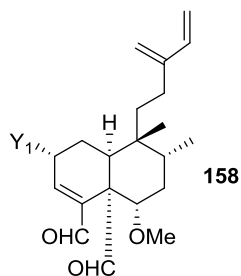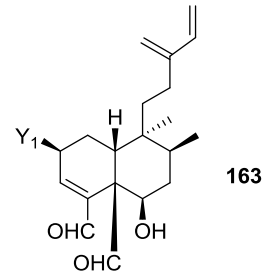

|            |                                                                                                         | R1                  | R2               |                             |                                                     |
|------------|---------------------------------------------------------------------------------------------------------|---------------------|------------------|-----------------------------|-----------------------------------------------------|
| <b>156</b> | 2-oxo-18-hydroxy-10 $\alpha$ ,17 $\alpha$ ,19 $\alpha$ ,20 $\beta$ -(-)-cleroda-3,13(16),14-triene      | CH <sub>2</sub> OH  | $\alpha Me$      | <i>Casearia corymbosa</i>   | <i>Phytochemistry</i> , 1990, <b>29</b> , 3591-3595 |
| <b>157</b> | 2-oxo-18,19-diacetoxy-10 $\alpha$ ,17 $\alpha$ ,19 $\alpha$ ,20 $\beta$ -(-)-cleroda-3,13(16),14-triene | CH <sub>2</sub> OAc | $\alpha CH_2OAc$ |                             |                                                     |
| <b>158</b> | balanspene H                                                                                            | —                   | —                | <i>Casearia balansae</i>    | <i>J. Nat. Prod.</i> , 2014, <b>77</b> , 2182–2189  |
| <b>163</b> | caseamembrin F                                                                                          | —                   | —                | <i>Casearia membranacea</i> | <i>J. Nat. Prod.</i> , 2004, <b>67</b> , 316-321    |

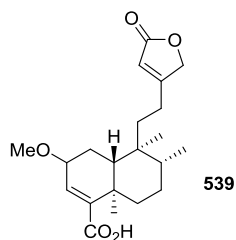

|            |                                                             |                            |                                                |
|------------|-------------------------------------------------------------|----------------------------|------------------------------------------------|
| <b>539</b> | 2 $\beta$ -methoxy-cleroda-3,13-dien-18-carboxy-15,16-olide | <i>Casearia sylvestris</i> | <i>Fitoterapia</i> , 2009, <b>80</b> , 404–407 |
|------------|-------------------------------------------------------------|----------------------------|------------------------------------------------|

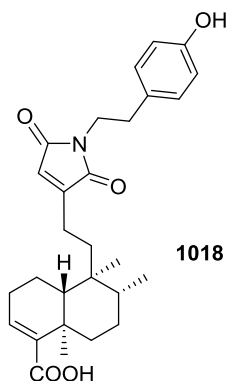

***CHRYSOCOMA* Genus**

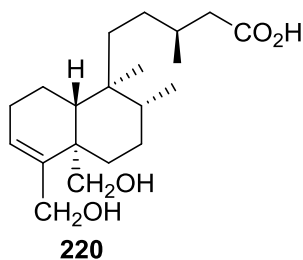

|            |                                        |                            |                                                   |
|------------|----------------------------------------|----------------------------|---------------------------------------------------|
| <b>220</b> | 18,19-dihydroxyclerod-3-en-15-oic acid | <i>Chrysocoma comaurea</i> | <i>Phytochemistry</i> , 1991, <b>30</b> , 607-609 |
|------------|----------------------------------------|----------------------------|---------------------------------------------------|

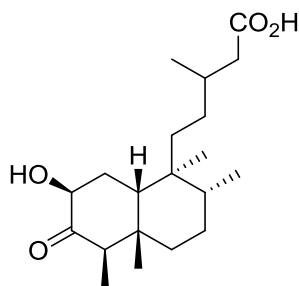

|            |                                                    |                            |                                                   |
|------------|----------------------------------------------------|----------------------------|---------------------------------------------------|
| <b>261</b> | 2β-hydroxy-3-oxo- <i>cis</i> -clerodan-15-oic acid | <i>Chrysocoma comaurea</i> | <i>Phytochemistry</i> , 1991, <b>30</b> , 607-609 |
|------------|----------------------------------------------------|----------------------------|---------------------------------------------------|

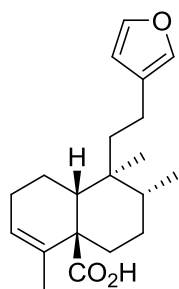

|            |                                                                |                            |                                                   |
|------------|----------------------------------------------------------------|----------------------------|---------------------------------------------------|
| <b>413</b> | 15,16-epoxy- <i>cis</i> -cleroda-3,13(16),14-trien-19-oic acid | <i>Chrysocoma comaurea</i> | <i>Phytochemistry</i> , 1991, <b>30</b> , 607-609 |
|------------|----------------------------------------------------------------|----------------------------|---------------------------------------------------|

**CLAUSENA Genus**

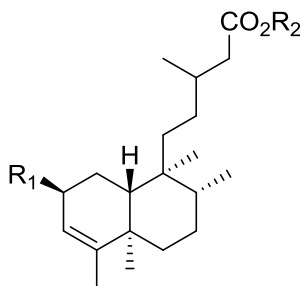

231 R1 = OCHO, R2 = H  
 232 R1 = OAc, R2 = H  
 233 R1 = H, R2 = Et

|     |                                       |                          |                                                        |
|-----|---------------------------------------|--------------------------|--------------------------------------------------------|
| 231 | 2β-(formyloxy)clerod-3-en-15-oic acid | <i>Clausena dunniana</i> | <i>Helv. Chim. Acta.</i> , 2003, <b>86</b> , 3187-3193 |
| 232 | 2β-(acetyloxy)clerod-3-en-15-oic acid |                          |                                                        |
| 233 | ethyl clerod-3-en-15-oate             |                          |                                                        |

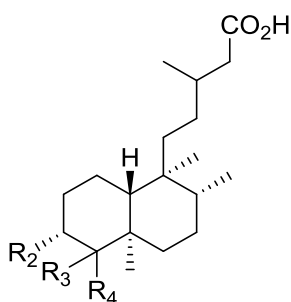

263 R2 = H, R3 = α-OH, R4 = β-CH<sub>2</sub>OH  
 264 R2 = H, R3 = β-OH, R4 = α-CH<sub>3</sub>  
 265 R2 = H, R3 = α-OH, R4 = β-CH<sub>3</sub>

|     |                                      |                          |                                                        |
|-----|--------------------------------------|--------------------------|--------------------------------------------------------|
| 263 | 4α,18-dihydroxyclerodan-15-oic acid  | <i>Clausena dunniana</i> | <i>Helv. Chim. Acta.</i> , 2003, <b>86</b> , 3187-3193 |
| 264 | 4β-hydroxyclerodan-15-oic acid       |                          |                                                        |
| 265 | 3α,4α-dihydroxy clerodan-15-oic acid |                          |                                                        |

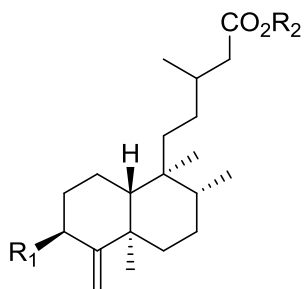

279 R1 = OH, R2 = H  
 280 R1 = H, R2 = Et

|     |                                       |                          |                                                        |
|-----|---------------------------------------|--------------------------|--------------------------------------------------------|
| 279 | 3β-hydroxy-clerod4(18)-en-15-oic acid | <i>Clausena dunniana</i> | <i>Helv. Chim. Acta.</i> , 2003, <b>86</b> , 3187-3193 |
| 280 | ethyl-clerod-4(18)-en-15-oate         |                          |                                                        |

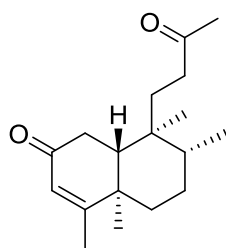

**1088**

|             |                                    |                          |                                                        |
|-------------|------------------------------------|--------------------------|--------------------------------------------------------|
| <b>1088</b> | 14,15-dinorclerod-3-ene-2,13-dione | <i>Clausena dunniana</i> | <i>Helv. Chim. Acta.</i> , 2003, <b>86</b> , 3187-3193 |
|-------------|------------------------------------|--------------------------|--------------------------------------------------------|

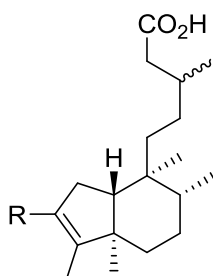

**1150** R = CO<sub>2</sub>H  
**1151** R = CHO

|             |                 |                          |                                                  |
|-------------|-----------------|--------------------------|--------------------------------------------------|
| <b>1150</b> | dunniana acid A | <i>Clausena dunniana</i> | <i>J. Nat. Prod.</i> , 2002, <b>65</b> , 392-394 |
| <b>1151</b> | dunniana acid B |                          |                                                  |

**CLEIDION Genus**

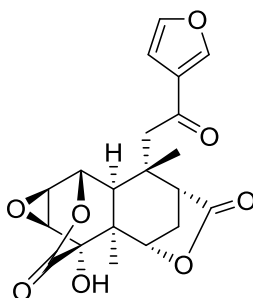

**342**

|            |             |                             |                                                     |
|------------|-------------|-----------------------------|-----------------------------------------------------|
| <b>342</b> | apiciflorin | <i>Cleidion spiciflorum</i> | <i>Phytochemistry</i> , 2006, <b>67</b> , 1029-1033 |
|------------|-------------|-----------------------------|-----------------------------------------------------|

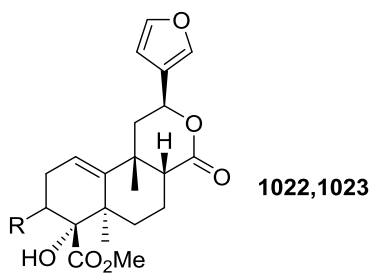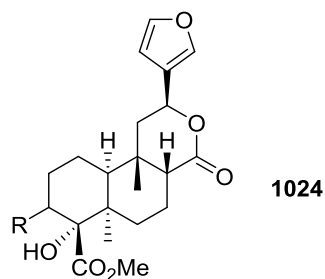

|      |                |            |                                 |                                                  |
|------|----------------|------------|---------------------------------|--------------------------------------------------|
| 1022 | cleidbrevoid A | $\beta$ T  | <i>Cleidion brevipetiolatum</i> | <i>Fitoterapia</i> , 2012, <b>83</b> , 1100-1104 |
| 1023 | cleidbrevoid B | $\alpha$ T |                                 |                                                  |
| 1024 | cleidbrevoid C | $\beta$ T  |                                 |                                                  |

**CLERODENDRUM Genus**

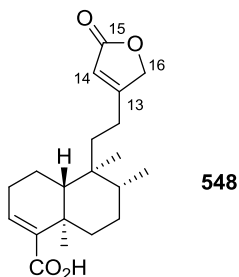

|     |                  |                            |                                                     |
|-----|------------------|----------------------------|-----------------------------------------------------|
| 548 | clerodermic acid | <i>Clerodendrum inerme</i> | <i>Phytochemistry</i> , 1990, <b>29</b> , 3671-3673 |
|-----|------------------|----------------------------|-----------------------------------------------------|

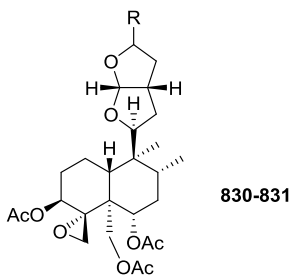

|     |                                                  |             |                            |                                                   |
|-----|--------------------------------------------------|-------------|----------------------------|---------------------------------------------------|
|     |                                                  | R           |                            |                                                   |
| 830 | 15-methoxy-14,15-dihydro-3-epicaryoptin          | $\beta$ OMe | <i>Clerodendrum inerme</i> | <i>Phytochemistry</i> , 1992, <b>31</b> , 338-340 |
| 831 | 14,15-dihydro-15 $\beta$ -methoxy-3-epicaryoptin | OH          |                            | <i>Phytochemistry</i> , 2005, <b>66</b> , 643-648 |

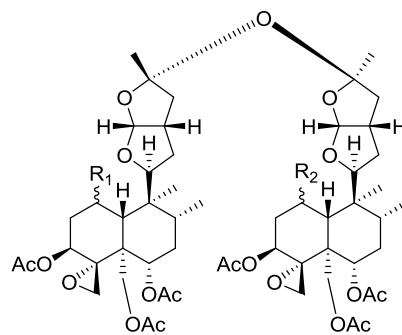

844,845

|     |          | R1    | R2    |                            |                                                   |
|-----|----------|-------|-------|----------------------------|---------------------------------------------------|
| 844 | inerme A | H     | H     | <i>Clerodendrum inerme</i> | <i>Phytochemistry</i> , 2005, <b>66</b> , 643-648 |
| 845 | inerme B | OMe/H | H/OMe |                            |                                                   |

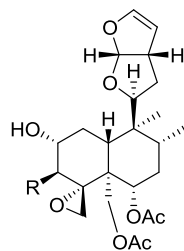

849-851

|     |                | R1              |                                 |                                                     |
|-----|----------------|-----------------|---------------------------------|-----------------------------------------------------|
| 849 | clerodendrin B | Y <sub>3</sub>  | <i>Clerodendrum inerme</i>      | <i>Phytochemistry</i> , 1993, <b>34</b> , 572-574   |
| 850 | clerodendrin C | Y <sub>10</sub> |                                 |                                                     |
| 851 | clerodendrin H | Y <sub>7</sub>  | <i>Clerodendrum trichotomum</i> | <i>Phytochemistry</i> , 1998, <b>49</b> , 1975-1980 |

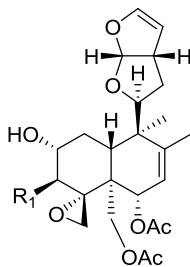

868-871

|     |                | R1              |                                 |                                                                   |
|-----|----------------|-----------------|---------------------------------|-------------------------------------------------------------------|
| 868 | clerodendrin I | Y <sub>6</sub>  | <i>Clerodendrum trichotomum</i> | <i>Biosci. Biotechnol. Biochem.</i> , 1999, <b>63</b> , 1795-1797 |
| 869 | clerodendrin E | Y <sub>10</sub> |                                 | <i>Phytochemistry</i> , 1998, <b>49</b> , 1975-1980               |
| 870 | clerodendrin F | Y <sub>7</sub>  |                                 |                                                                   |
| 871 | clerodendrin G | Y <sub>1</sub>  |                                 |                                                                   |

**COLOUHOUNIA Genus**

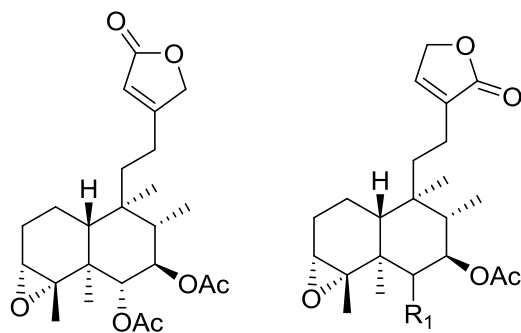

**515**

**516,517**

|            |                   |              |                             |                                                           |
|------------|-------------------|--------------|-----------------------------|-----------------------------------------------------------|
| <b>515</b> | seguiniilactone A | —            | <i>Colquhounia seguinii</i> | <i>J. Integr. Plant Biol.</i> , 2014, <b>56</b> , 928-940 |
| <b>516</b> | seguiniilactone B | $\alpha$ OAc |                             |                                                           |
| <b>517</b> | seguiniilactone C | H            |                             |                                                           |

**CONYZA Genus**

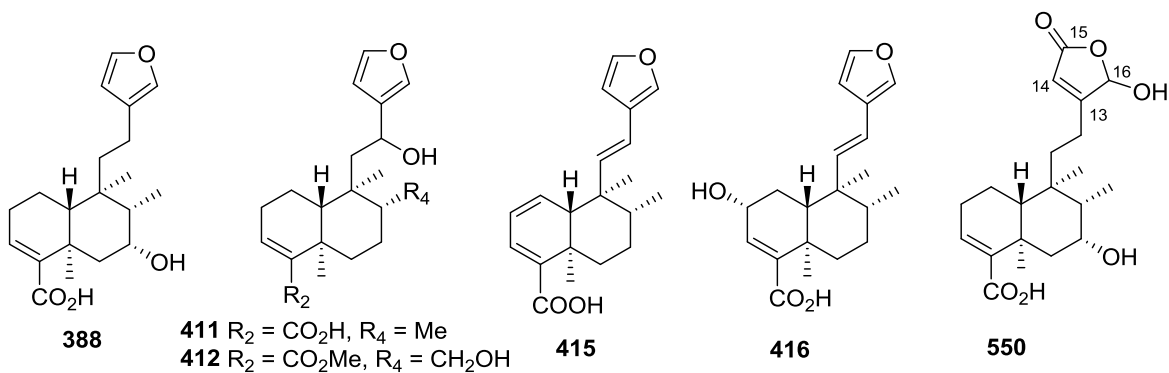

**388**

**411** R<sub>2</sub> = CO<sub>2</sub>H, R<sub>4</sub> = Me

**412** R<sub>2</sub> = CO<sub>2</sub>Me, R<sub>4</sub> = CH<sub>2</sub>OH

**415**

**416**

**550**

|            |                                                    |                         |                                                 |
|------------|----------------------------------------------------|-------------------------|-------------------------------------------------|
| <b>388</b> | 7 $\alpha$ -hydroxyhardwickiic acid                | <i>Conyza hypoleuca</i> | <i>Phytochemistry</i> 1991, <b>30</b> , 575-581 |
| <b>411</b> | 12-hydroxyhardwickiic acid                         |                         |                                                 |
| <b>412</b> | 12,17-dihydroxyhardwickiic acid methyl ester       |                         |                                                 |
| <b>415</b> | 1,2,11,12E-tetrahydrohardwickiic acid              |                         |                                                 |
| <b>416</b> | 2 $\alpha$ -hydroxy-11,12E-dehydrohardwickiic acid |                         |                                                 |
| <b>550</b> | conyhypolide A                                     |                         |                                                 |

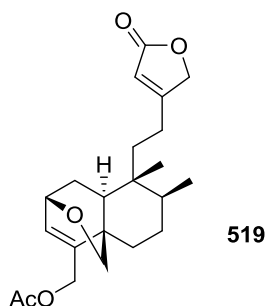

|            |               |                      |                                                 |
|------------|---------------|----------------------|-------------------------------------------------|
| <b>519</b> | conyzalactone | <i>Conyza blinii</i> | <i>Heterocycles</i> , 1999, <b>51</b> , 605-609 |
|------------|---------------|----------------------|-------------------------------------------------|

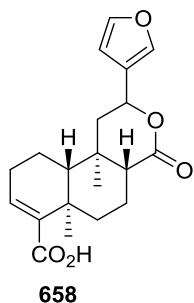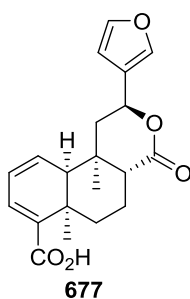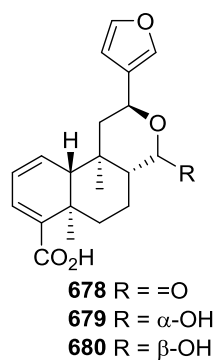

|            |                                      |                           |                                                     |
|------------|--------------------------------------|---------------------------|-----------------------------------------------------|
| <b>658</b> | 17-oxo-1,2-dihydrowelwitschic acid   | <i>Conyza welwitschii</i> | <i>Phytochemistry</i> , 1990, <b>29</b> , 2247-2252 |
| <b>677</b> | 17-oxo-10-epi-welwitschic acid       |                           |                                                     |
| <b>678</b> | 17-oxo-welwitschic acid              |                           |                                                     |
| <b>679</b> | 17 $\alpha$ -hydroxywelwitschic acid |                           |                                                     |
| <b>680</b> | 17 $\beta$ -hydroxywelwitschic acid  |                           |                                                     |

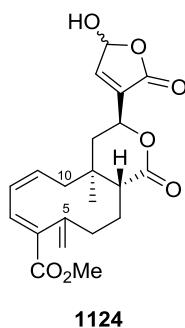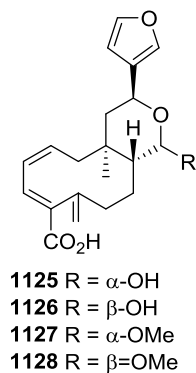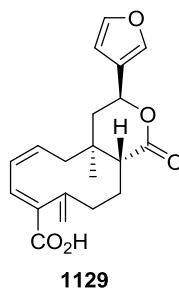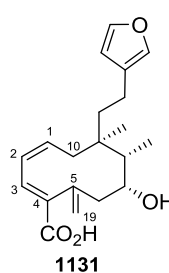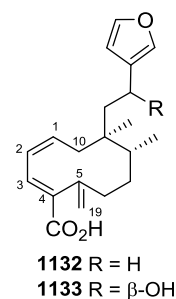

|             |                                                        |                           |                                                     |
|-------------|--------------------------------------------------------|---------------------------|-----------------------------------------------------|
| <b>1124</b> | <i>seco</i> -hypoleucolide                             | <i>Conyza hypoleuca</i>   | <i>Phytochemistry</i> 1991, <b>30</b> , 575-581     |
| <b>1125</b> | 17 $\alpha$ -hydroxy-12 $\beta$ ,17-epoxystrictic acid | <i>Conyza welwitschii</i> | <i>Phytochemistry</i> , 1990, <b>29</b> , 2247-2252 |
| <b>1126</b> | 17 $\beta$ -hydroxy-12 $\beta$ ,17-epoxystrictic acid  |                           |                                                     |
| <b>1127</b> | 17 $\alpha$ - <i>O</i> -methyl ether of <b>1125</b>    |                           |                                                     |
| <b>1128</b> | 17 $\beta$ - <i>O</i> -methyl ether of <b>1126</b>     |                           |                                                     |
| <b>1129</b> | strictic acid 12 $\beta$ ,17-olide                     |                           |                                                     |



|             |                                      |                           |                                                     |
|-------------|--------------------------------------|---------------------------|-----------------------------------------------------|
| <b>1131</b> | 7 $\alpha$ -hydroxystrictic acid     | <i>Conyza hypoleuca</i>   | <i>Phytochemistry</i> 1991, <b>30</b> , 575-581     |
| <b>1132</b> | 11,12 <i>E</i> -dehydrostrictic acid |                           |                                                     |
| <b>1133</b> | 12-hydroxystrictic acid              | <i>Conyza welwitschii</i> | <i>Phytochemistry</i> , 1990, <b>29</b> , 2247-2252 |

**COPAIFERA Genus**

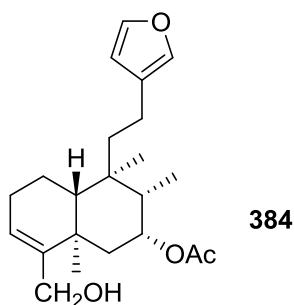

|            |                               |                      |                                                     |
|------------|-------------------------------|----------------------|-----------------------------------------------------|
| <b>384</b> | 7 $\alpha$ -acetoxycornutin D | <i>Copaifera</i> sp. | <i>Phytochemistry</i> , 1996, <b>42</b> , 1653-1656 |
|------------|-------------------------------|----------------------|-----------------------------------------------------|

**CORNUTIA Genus**

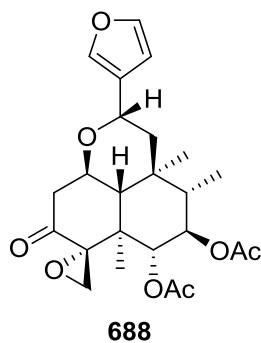

|            |            |                             |                                                  |
|------------|------------|-----------------------------|--------------------------------------------------|
| <b>688</b> | cornutin A | <i>Cornutia grandifolia</i> | <i>J. Org. Chem.</i> , 1992, <b>57</b> , 862-866 |
|------------|------------|-----------------------------|--------------------------------------------------|

**CRASSOCEPHALUM Genus**

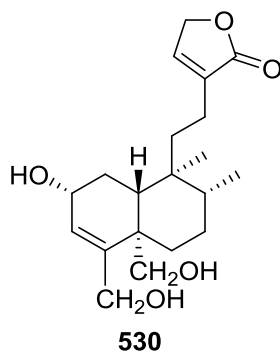

|            |                                                                                  |                                  |                                                      |
|------------|----------------------------------------------------------------------------------|----------------------------------|------------------------------------------------------|
| <b>530</b> | <i>ent</i> -2 $\beta$ ,18,19-trihydroxycyclo- <i>roda</i> -3,13-dien-16,15-olide | <i>Crassocephalum bauchiense</i> | <i>Nat. Prod. Res.</i> , 2015, <b>29</b> , 1990-1994 |
|------------|----------------------------------------------------------------------------------|----------------------------------|------------------------------------------------------|

**CROTON Genus**

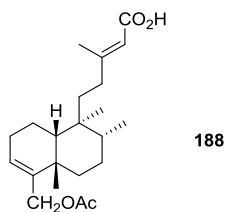

|            |               |                         |                                                          |
|------------|---------------|-------------------------|----------------------------------------------------------|
| <b>188</b> | crotonic acid | <i>Croton chilensis</i> | <i>Bol. Soc. Chil. Quim.</i> , 1995, <b>40</b> , 157-162 |
|------------|---------------|-------------------------|----------------------------------------------------------|

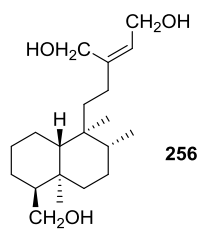

|            |             |                        |                                                   |
|------------|-------------|------------------------|---------------------------------------------------|
| <b>256</b> | crolechinol | <i>Croton lechleri</i> | <i>Phytochemistry</i> , 1993, <b>32</b> , 755-760 |
|------------|-------------|------------------------|---------------------------------------------------|

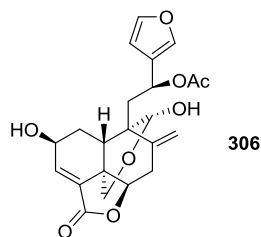

|            |           |                               |                                                 |
|------------|-----------|-------------------------------|-------------------------------------------------|
| <b>306</b> | plaunol E | <i>Croton stellatopilosus</i> | <i>J. Nat. Med.</i> , 2013, <b>67</b> , 174-181 |
|------------|-----------|-------------------------------|-------------------------------------------------|

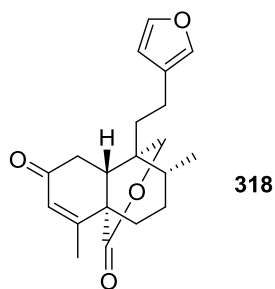

|            |           |                        |                                                   |
|------------|-----------|------------------------|---------------------------------------------------|
| <b>318</b> | sacacarin | <i>Croton cajucara</i> | <i>Phytochemistry</i> , 1998, <b>49</b> , 823-828 |
|------------|-----------|------------------------|---------------------------------------------------|

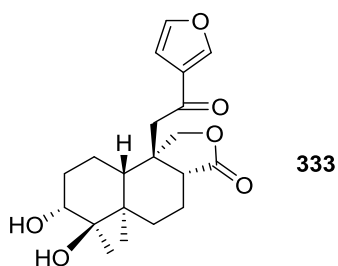

|            |                      |                         |                                                        |
|------------|----------------------|-------------------------|--------------------------------------------------------|
| <b>333</b> | furocrotinsulolide B | <i>Croton insularis</i> | <i>Helv. Chim. Acta.</i> , 2005, <b>88</b> , 2654-2660 |
|------------|----------------------|-------------------------|--------------------------------------------------------|

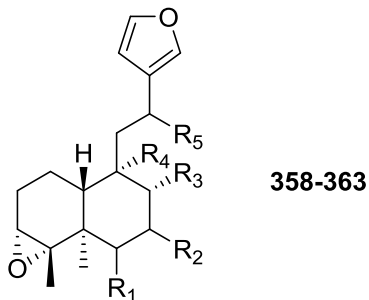

|            |                  | R1   | R2   | R3                 | R4                  | R5  |                            |                                                           |
|------------|------------------|------|------|--------------------|---------------------|-----|----------------------------|-----------------------------------------------------------|
| <b>358</b> | epoxychiromodine | H    | H    | CO <sub>2</sub> Me | Me                  | =O  | <i>Croton megalocarpus</i> | <i>Phytochemistry</i> , 1992, <b>31</b> , 2055-2058       |
| <b>359</b> | eluterin C       | H    | αOAc | Me                 | CH <sub>2</sub> OH  | H   | <i>Croton eluteria</i>     | <i>J. Agric. Food Chem.</i> , 2002, <b>50</b> , 5131-5138 |
| <b>360</b> | eluterin D       | H    | αOH  | Me                 | CH <sub>2</sub> OAc | H   |                            |                                                           |
| <b>361</b> | eluterin E       | H    | αOAc | Me                 | CH <sub>2</sub> OH  | βOH |                            |                                                           |
| <b>362</b> | eluterin F       | αOAc | αOAc | Me                 | CH <sub>2</sub> OAc | H   |                            |                                                           |
| <b>363</b> | eluterin G       | αOAc | αOAc | Me                 | CHO                 | H   |                            |                                                           |

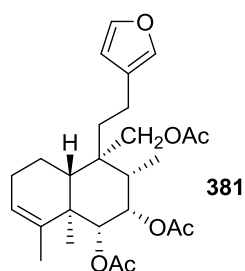

|            |            |                        |                                                           |
|------------|------------|------------------------|-----------------------------------------------------------|
| <b>381</b> | eluterin K | <i>Croton eluteria</i> | <i>J. Agric. Food Chem.</i> , 2003, <b>51</b> , 6970-6974 |
|------------|------------|------------------------|-----------------------------------------------------------|

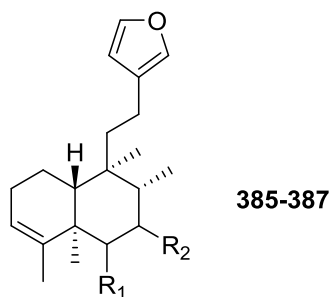

|            |                                          | R1           | R2          |                           |                                                     |
|------------|------------------------------------------|--------------|-------------|---------------------------|-----------------------------------------------------|
| <b>385</b> | 6 $\alpha$ -hydroxyannonene              | $\alpha$ OH  | H           | <i>Croton sonderianus</i> | <i>Phytochemistry</i> , 1994, <b>36</b> , 1457-1463 |
| <b>386</b> | 6 $\alpha$ ,7 $\beta$ -dihydroxyannonene | $\alpha$ OH  | $\beta$ OH  |                           |                                                     |
| <b>387</b> | 6 $\alpha$ ,7 $\beta$ -diacetoxyannonene | $\alpha$ OAc | $\beta$ OAc |                           |                                                     |

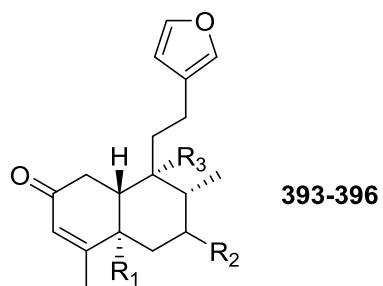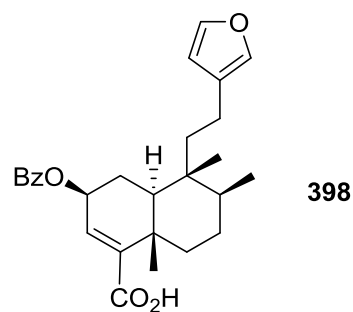

|            |                                          | R1          | R2  | R3                 |                            |                                                       |
|------------|------------------------------------------|-------------|-----|--------------------|----------------------------|-------------------------------------------------------|
| <b>393</b> | 15,16-epoxy-3,13(16)-clerodatriene-2-one | $\alpha$ Me | H   | Me                 | <i>Croton ururucana</i>    | <i>Phytochemistry</i> , 1998, <b>49</b> , 171-174     |
| <b>394</b> | cajucarin A                              | CHO         | H   | CO <sub>2</sub> Me | <i>Croton cajucara</i>     | <i>Chem. Pharm. Bull.</i> , 1990, <b>38</b> , 701-705 |
| <b>395</b> | cromiargyne                              | Me          | H   | CO <sub>2</sub> Me | <i>Croton hemiargyreus</i> | <i>Nat. Prod. Lett.</i> , 1998, <b>12</b> , 41-46     |
| <b>396</b> | 7-acetoxycromiargyne                     | Me          | OAc | CO <sub>2</sub> Me |                            |                                                       |
| <b>398</b> | laevigatbenzoate                         | --          | --  | --                 | <i>Croton laevigatus</i>   | <i>J. Nat. Med.</i> , 2011, <b>65</b> , 391-394       |

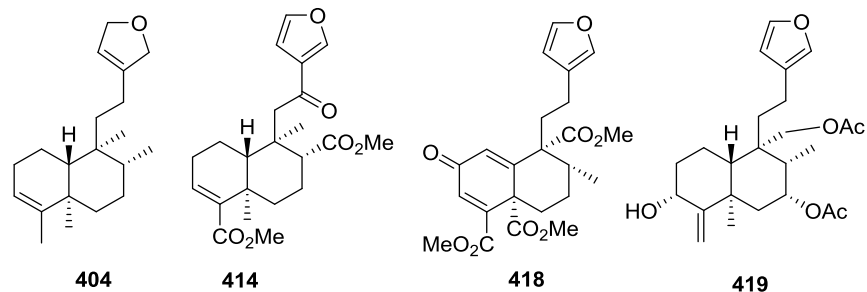

|            |                    |                            |                                                           |
|------------|--------------------|----------------------------|-----------------------------------------------------------|
| <b>404</b> | crotonolide G      | <i>Croton laui</i>         | <i>J. Nat. Prod.</i> , 2014, <b>77</b> , 1013-1020        |
| <b>414</b> | crotomembranafuran | <i>Croton membranaceus</i> | <i>Nat. Prod. Commun.</i> , 2008, <b>3</b> , 1875-1878    |
| <b>418</b> | crotonoligaketone  | <i>Croton oligandrum</i>   | <i>Z. Naturforsch. C</i> , 2014, <b>69</b> , 181-185      |
| <b>419</b> | eluterin B         | <i>Croton eluteria</i>     | <i>J. Agric. Food Chem.</i> , 2002, <b>50</b> , 5131-5138 |

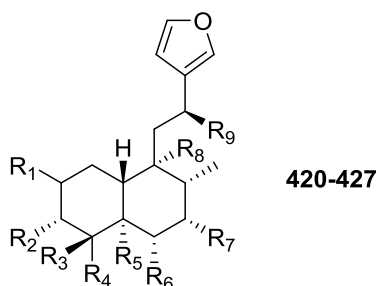

|            |                                                    | R1 | R2 | R3 | R4                        | R5 | R6 | R7  | R8                  | R9 |                        |                                                           |
|------------|----------------------------------------------------|----|----|----|---------------------------|----|----|-----|---------------------|----|------------------------|-----------------------------------------------------------|
| <b>420</b> | crotonolide H                                      | H  | OH | OH | Me                        | Me | H  | H   | Me                  | OH | <i>Croton laui</i>     | <i>J. Nat. Prod.</i> , 2014, <b>77</b> , 1013-1020        |
| <b>421</b> | 12-deoxycrotonolide H                              | H  | OH | OH | Me                        | Me | H  | H   | Me                  | H  |                        |                                                           |
| <b>422</b> | crolechinic acid                                   | H  | H  | H  | $\beta$ CO <sub>2</sub> H | Me | H  | H   | Me                  | H  | <i>Croton lechleri</i> | <i>Phytochem.</i> , 1993, <b>32</b> , 755-760             |
| <b>424</b> | cascahilladione                                    | =O | H  | H  | $\alpha$ Me               | Me | H  | H   | Me                  | =O | <i>Croton eluteria</i> | <i>J. Agric. Food Chem.</i> , 2003, <b>51</b> , 6970-6974 |
| <b>425</b> | eluterin A                                         | H  | =O | H  | $\beta$ Me                | Me | H  | OAc | CH <sub>2</sub> OAc | H  |                        | <i>J. Agric. Food Chem.</i> , 2002, <b>50</b> , 5131-5138 |
| <b>426</b> | 3,12-dioxo-15,16-epoxycrocloda-13(16),14-dien-9-al | H  | =O | H  | $\beta$ Me                | Me | H  | H   | CHO                 | =O | <i>Croton hovarum</i>  | <i>Phytochem.</i> , 1997, <b>45</b> , 379-381             |
| <b>427</b> | 3 $\alpha$ ,4 $\beta$ -dihydroxy-15,16-epoxy-12-   | H  | OH | OH | $\alpha$ Me               | Me | H  | H   | CHO                 | =O |                        | <i>Phytochem.</i> , 1996, <b>41</b> , 561-563             |

|  |                                 |  |  |  |  |  |  |  |  |  |  |  |
|--|---------------------------------|--|--|--|--|--|--|--|--|--|--|--|
|  | oxo-cleroda-13(16),14-dien-9-al |  |  |  |  |  |  |  |  |  |  |  |
|--|---------------------------------|--|--|--|--|--|--|--|--|--|--|--|

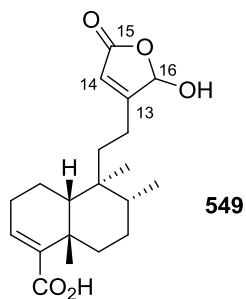

|            |                                                                            |                           |                                                   |
|------------|----------------------------------------------------------------------------|---------------------------|---------------------------------------------------|
| <b>549</b> | (-)-12,16-dihydroxy- <i>cis</i> -cleroda-3,13-dien-15-oic acid-15,16-olide | <i>Croton schiedeanus</i> | <i>Phytochemistry</i> , 1999, <b>51</b> , 643-649 |
|------------|----------------------------------------------------------------------------|---------------------------|---------------------------------------------------|

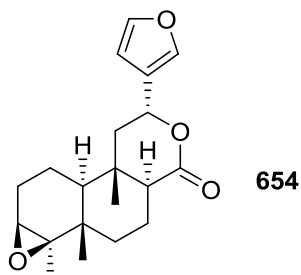

|            |                                                       |                             |                                                    |
|------------|-------------------------------------------------------|-----------------------------|----------------------------------------------------|
| <b>654</b> | 3,4,15,16-diepoxy-cleroda-13(16),14-diene-12,17-olide | <i>Croton oblongifolius</i> | <i>Phytochem. Lett.</i> , 2011, <b>4</b> , 147-150 |
|------------|-------------------------------------------------------|-----------------------------|----------------------------------------------------|

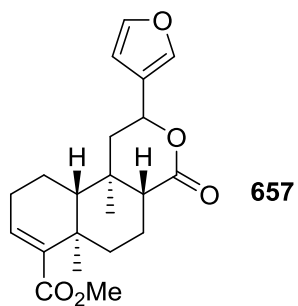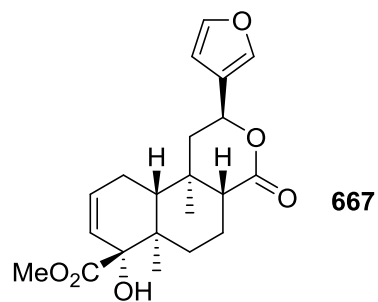

|            |                           |                            |                                                        |
|------------|---------------------------|----------------------------|--------------------------------------------------------|
| <b>657</b> | 12-epi-methyl-barbascoate | <i>Croton ururucana</i>    | <i>Phytochemistry</i> , 1998, <b>49</b> , 171-174      |
| <b>667</b> | 8-epicordatin             | <i>Croton palanostigma</i> | <i>J. Braz. Chem. Soc.</i> , 2010, <b>21</b> , 731-739 |

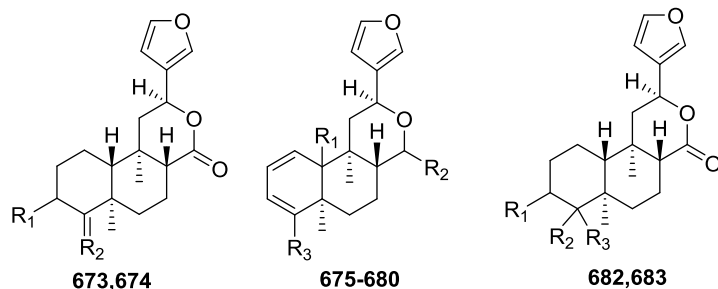

|            |                                | R1          | R2              | R3                 |                         |                                                               |
|------------|--------------------------------|-------------|-----------------|--------------------|-------------------------|---------------------------------------------------------------|
| <b>673</b> | crotonolide E                  | =O          | $\alpha$ Me     | —                  | <i>Croton laui</i>      | <i>J. Nat. Prod.</i> , 2014, <b>77</b> , 1013-1020            |
| <b>674</b> | crotonolide F                  | $\alpha$ OH | CH <sub>2</sub> | —                  |                         |                                                               |
| <b>675</b> | —                              | $\alpha$ H  | =O              | CO <sub>2</sub> Me | <i>Croton jimenezii</i> | <i>Ingenieria Y Ciencia Quimica</i> , 2000, <b>19</b> , 68-73 |
| <b>676</b> | —                              | $\beta$ H   | =O              | CO <sub>2</sub> Me |                         |                                                               |
| <b>682</b> | methyl 3-oxo-12-epibarbascoate | =O          | H               | CO <sub>2</sub> Me | <i>Croton urucurana</i> | <i>J. Braz. Chem. Soc.</i> , 2013, <b>24</b> , 609-614.       |
| <b>683</b> | furocrotonsulolide A           | $\alpha$ OH | $\beta$ OH      | $\alpha$ Me        | <i>Croton insularis</i> | <i>Helv. Chim. Acta.</i> , 2005, <b>88</b> , 2654-2660        |

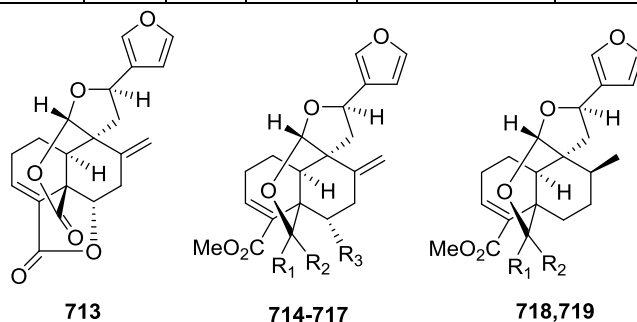

|            |                  |    |     |     |   |                    |                                                    |
|------------|------------------|----|-----|-----|---|--------------------|----------------------------------------------------|
| <b>713</b> | crotonolide A    | —  | —   | —   | — | <i>Croton laui</i> | <i>J. Nat. Prod.</i> , 2014, <b>77</b> , 1013-1020 |
| <b>714</b> | crotonolide B    | H  | OH  | H   | — |                    |                                                    |
| <b>715</b> | isocrotonolide B | OH | H   | H   | — |                    |                                                    |
| <b>716</b> | crotonolide C    | H  | OH  | OAc | — |                    |                                                    |
| <b>717</b> | isocrotonolide C | OH | H   | OAc | — |                    |                                                    |
| <b>718</b> | crotonolide D    | OH | OAc | —   | — |                    |                                                    |
| <b>719</b> | isocrotonolide D | H  | OH  | —   | — |                    |                                                    |

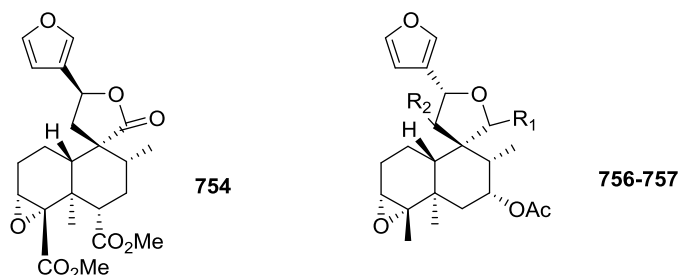

|            |            | R1          | R2 |                        |                                                           |
|------------|------------|-------------|----|------------------------|-----------------------------------------------------------|
| <b>754</b> | korberin A | —           | —  | <i>Croton lechleri</i> | <i>Phytochemistry</i> , 1993, <b>34</b> , 265-268         |
| <b>756</b> | eluterin J | H           | =O | <i>Croton eluteria</i> | <i>J. Agric. Food Chem.</i> , 2002, <b>50</b> , 5131-5138 |
| <b>757</b> | eluterin I | $\beta$ OAc | H  |                        |                                                           |

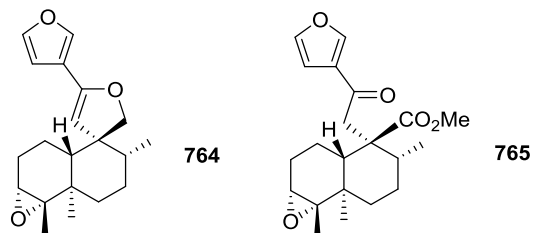

|            |              |                       |                                                |
|------------|--------------|-----------------------|------------------------------------------------|
| <b>764</b> | crotonpene A | <i>Croton yanhuui</i> | <i>Fitoterapia</i> , 2014, <b>95</b> , 229-233 |
| <b>765</b> | crotonpene B |                       |                                                |

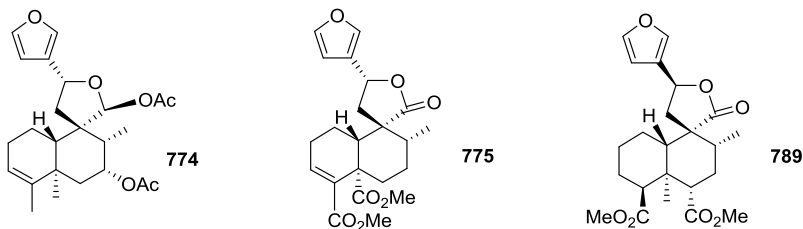

|            |                  |                           |                                                           |
|------------|------------------|---------------------------|-----------------------------------------------------------|
| <b>774</b> | eluterin H       | <i>Croton eluteria</i>    | <i>J. Agric. Food Chem.</i> , 2002, <b>50</b> , 5131-5138 |
| <b>775</b> | crotocorylifuran | <i>Croton haumanianus</i> | <i>Tetrahedron</i> , 1990, <b>46</b> , 5199-5202          |
| <b>779</b> | korberin B       | <i>Croton lechleri</i>    | <i>Phytochemistry</i> , 1993, <b>34</b> , 265-268         |

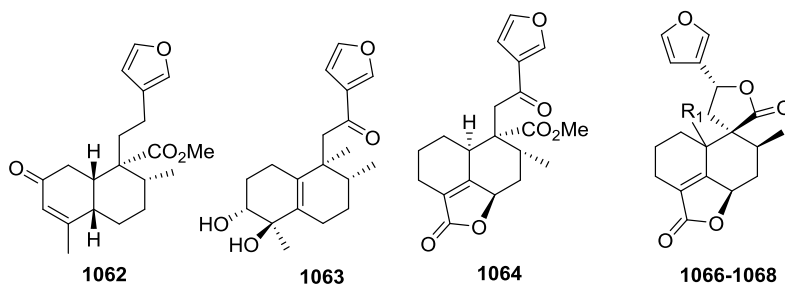

|             |                                                                          |                     |                            |                                                               |
|-------------|--------------------------------------------------------------------------|---------------------|----------------------------|---------------------------------------------------------------|
| <b>1062</b> | cajucarin B                                                              | —                   | <i>Croton cajucara</i>     | <i>Chem. Pharm. Bull.</i> , 1990, <b>38</b> , 701-705         |
| <b>1063</b> | 3α,4β-dihydroxy-15,16-epoxy-19-nor-12-oxo-cleroda-5(10),13(16),14-triene | —                   | <i>Croton hovarum</i>      | <i>Phytochemistry</i> , 1997, <b>45</b> , 379-381             |
| <b>1064</b> | crotoeurin C                                                             | ---                 | <i>Croton euryphyllus</i>  | <i>Bioorg. Med. Chem. Lett.</i> , 2015, <b>25</b> , 1329-1332 |
| <b>1066</b> | jatrophoidin                                                             | αCO <sub>2</sub> Me | <i>Croton jatrophoides</i> | <i>Planta Med.</i> , 2009, <b>75</b> , 262-267                |
| <b>1067</b> | isoteucvin                                                               | βH                  |                            |                                                               |
| <b>1068</b> | crassifolin G                                                            | αOH                 | <i>Croton crassifolius</i> | <i>J. Nat. Prod.</i> , 2012, <b>75</b> , 2188-2192            |

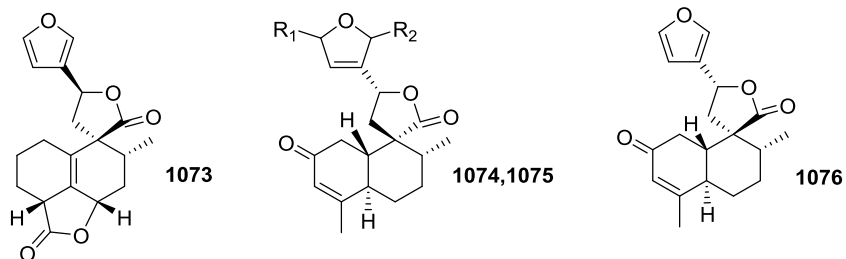



|             |                               |    |    |                            |                                                        |
|-------------|-------------------------------|----|----|----------------------------|--------------------------------------------------------|
| <b>1073</b> | crassifolin H                 | —  | —  | <i>Croton crassifolius</i> | <i>Heterocycles</i> , 2014, <b>89</b> , 1585-1593      |
| <b>1074</b> | cajucarinolide                | OH | =O | <i>Croton cajucara</i>     | <i>Planta Med.</i> , 1992, <b>58</b> , 549-551         |
| <b>1075</b> | isocajucarinolide             | =O | OH |                            |                                                        |
| <b>1076</b> | <i>trans</i> -dehydrocrotonin | —  | —  | <i>Croton cajucara</i>     | <i>J. Braz. Chem. Soc.</i> , 2014, <b>25</b> , 629-638 |

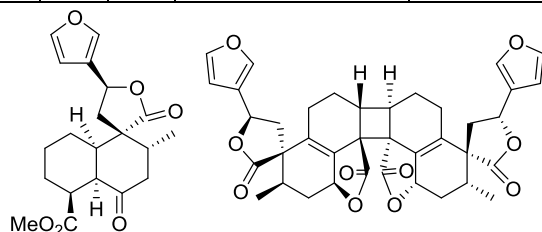

**1083**

**1084**

|             |              |                           |                                                               |
|-------------|--------------|---------------------------|---------------------------------------------------------------|
| <b>1083</b> | crotoeurin B | <i>Croton euryphyllus</i> | <i>Bioorg. Med. Chem. Lett.</i> , 2015, <b>25</b> , 1329-1332 |
| <b>1084</b> | crotoeurin A |                           |                                                               |

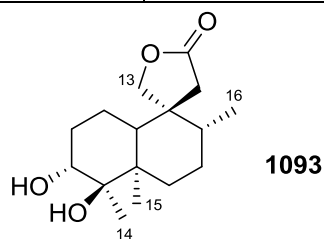

**1093**

|             |                  |                         |                                                        |
|-------------|------------------|-------------------------|--------------------------------------------------------|
| <b>1093</b> | crotoinsulactone | <i>Croton insularis</i> | <i>Helv. Chim. Acta.</i> , 2005, <b>88</b> , 2654-2660 |
|-------------|------------------|-------------------------|--------------------------------------------------------|

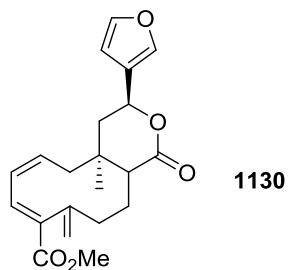

**1130**

|             |   |                         |                                                               |
|-------------|---|-------------------------|---------------------------------------------------------------|
| <b>1130</b> | — | <i>Croton jimenezii</i> | <i>Ingenieria Y Ciencia Quimica</i> , 2000, <b>19</b> , 68-73 |
|-------------|---|-------------------------|---------------------------------------------------------------|

**CYATHOCALYX Genus**

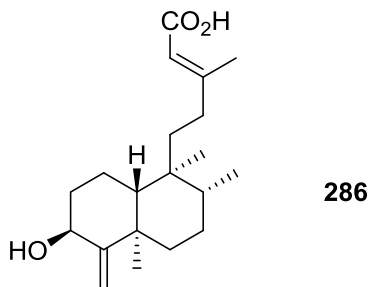

|            |                                              |                              |                                                   |
|------------|----------------------------------------------|------------------------------|---------------------------------------------------|
| <b>286</b> | 3-hydroxy-cleroda-4(18),13Z-dien-15-oic acid | <i>Cyathocalyx zeylanica</i> | <i>Phytochemistry</i> , 1995, <b>39</b> , 443-445 |
|------------|----------------------------------------------|------------------------------|---------------------------------------------------|

**CYSTODYTES Genus**

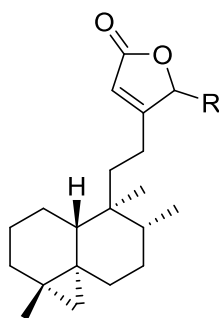

**612-613**

|            |             |    |                      |                                                |
|------------|-------------|----|----------------------|------------------------------------------------|
| <b>612</b> | dytesinin A | OH | <i>Cystodytes</i> sp | <i>Tetrahedron</i> 2000, <b>56</b> , 7923-7926 |
| <b>613</b> | dytesinin B | H  |                      |                                                |

**DEMOTARISIA Genus**

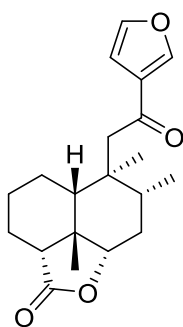

**309**

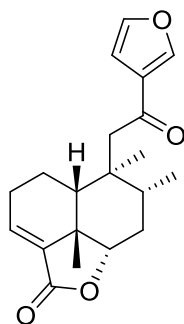

**310**

|            |                     |                                |                                                     |
|------------|---------------------|--------------------------------|-----------------------------------------------------|
| <b>309</b> | dihydrolinguifolide | <i>Demotarisia linguifolia</i> | <i>Phytochemistry</i> , 1990, <b>29</b> , 3229-3231 |
| <b>310</b> | linguifolide        |                                |                                                     |

**DETARIUM Genus**

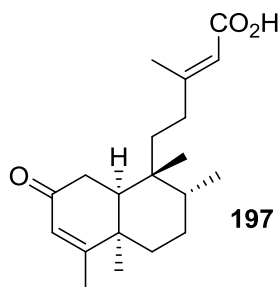

**197**

|            |                                             |                             |                                                  |
|------------|---------------------------------------------|-----------------------------|--------------------------------------------------|
| <b>197</b> | 5 $\alpha$ ,8 $\alpha$ -2-oxokolavenic acid | <i>Detarium microcarpum</i> | <i>J. Nat. Prod.</i> , 2006, <b>69</b> , 768-773 |
|------------|---------------------------------------------|-----------------------------|--------------------------------------------------|

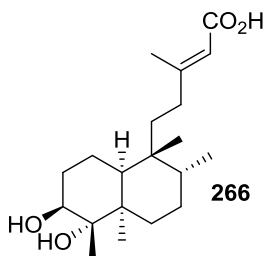

**266**

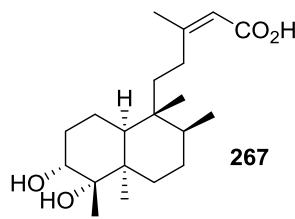

**267**

|            |                                            |                             |                                                  |
|------------|--------------------------------------------|-----------------------------|--------------------------------------------------|
| <b>266</b> | 3,4-dihydroxycyclohexan-13E-en-15-oic acid | <i>Detarium microcarpum</i> | <i>J. Nat. Prod.</i> , 2006, <b>69</b> , 768-773 |
| <b>267</b> | 3,4-dihydroxycyclohexan-13Z-en-15-oic acid |                             |                                                  |

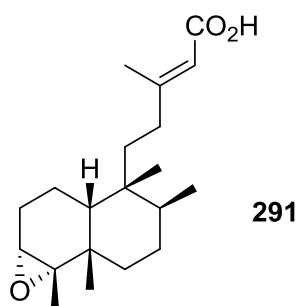

|            |                                               |                             |                                                  |
|------------|-----------------------------------------------|-----------------------------|--------------------------------------------------|
| <b>291</b> | 3,4-epoxyclerodan-13 <i>E</i> -en-15-oic acid | <i>Detarium microcarpum</i> | <i>J. Nat. Prod.</i> , 2006, <b>69</b> , 768-773 |
|------------|-----------------------------------------------|-----------------------------|--------------------------------------------------|

**DICRANOPTERIS Genus**

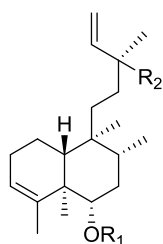

**903-906**

|            |                                                                                                                                                                                                                                     |                                                     |                                                                 |                             |                                                   |
|------------|-------------------------------------------------------------------------------------------------------------------------------------------------------------------------------------------------------------------------------------|-----------------------------------------------------|-----------------------------------------------------------------|-----------------------------|---------------------------------------------------|
| <b>905</b> | (6 <i>S</i> ,13 <i>S</i> )-6- <i>O</i> -[ $\beta$ -D-glucopyranosyl-(1 $\rightarrow$ 4)- $\alpha$ -L-rhamnopyranosyl]-13- <i>O</i> -[ $\alpha$ -L-rhamnopyranosyl-(1 $\rightarrow$ 4)- $\beta$ -D-fucopyranosyl]-cleroda-3,14-diene | $\alpha$ -L-Rha-(4 $\rightarrow$ 1)- $\beta$ -D-Glc | $\beta$ -{ $\beta$ -D-Fuc-(4 $\rightarrow$ 1)- $\alpha$ -L-Rha} | <i>Dicranopteris pedata</i> | <i>Phytochemistry</i> , 1997, <b>46</b> , 839-844 |
| <b>906</b> | (6 <i>S</i> ,13 <i>S</i> )-cleroda-3,14-diene-6,13-diol-6- <i>O</i> - $\beta$ -glucopyranosyl-13- <i>O</i> - $\beta$ -fucopyranosyl-(1 $\rightarrow$ 2)- $\alpha$ -rhamnopyranoside                                                 | $\beta$ -Glc                                        | $\beta$ -{ $\alpha$ -Rha-(2 $\rightarrow$ 1)- $\beta$ -Fuc}     |                             |                                                   |

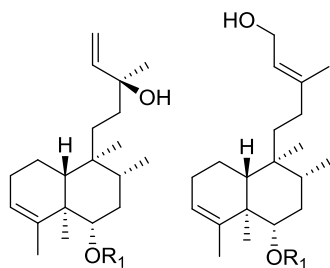

**910,911**

**912,913**

|            |                                                                                                                                                                  |                                                                          |                                |                                                  |
|------------|------------------------------------------------------------------------------------------------------------------------------------------------------------------|--------------------------------------------------------------------------|--------------------------------|--------------------------------------------------|
| <b>910</b> | (6 <i>S</i> ,13 <i>S</i> )-6- <i>O</i> -[6- <i>O</i> -acetyl- $\beta$ -D-glucopyranosyl-(1 $\rightarrow$ 4)- $\alpha$ -L-rhamnopyranosyl]cleroda-3,14-dien-13-ol | 6- <i>O</i> -acetyl- $\beta$ -D-Glc-(1 $\rightarrow$ 4)- $\alpha$ -L-Rha | <i>Dicranopteris dichotoma</i> | <i>J. Nat. Prod.</i> , 2007, <b>70</b> , 265-268 |
| <b>911</b> | (6 <i>S</i> ,13 <i>S</i> )-6- <i>O</i> -[4- <i>O</i> -acetyl- $\beta$ -D-glucopyranosyl-(1 $\rightarrow$ 4)- $\alpha$ -L-rhamnopyranosyl]cleroda-3,14-dien-13-ol | 4- <i>O</i> -acetyl- $\beta$ -D-Glc-(1 $\rightarrow$ 4)- $\alpha$ -L-    |                                |                                                  |

|            |                                                                                                                        |                                           |  |  |
|------------|------------------------------------------------------------------------------------------------------------------------|-------------------------------------------|--|--|
|            |                                                                                                                        | Rha                                       |  |  |
| <b>912</b> | 6- <i>O</i> -[6- <i>O</i> -acetyl-β-D-glucopyranosyl-(1-4)-α-L-rhamnopyranosyl]-(13 <i>E</i> )-cleroda-3,13-dien-15-ol | 6- <i>O</i> -acetyl-β-D-Glc-(1→4)-α-L-Rha |  |  |
| <b>913</b> | 6- <i>O</i> -[β-D-glucopyranosyl]-(1→4)-α-L-rhamnopyranosyl-(13 <i>E</i> )-cleroda-3,13-dien-15-ol                     | β-Glc-(1→4)-α-L-Rha                       |  |  |

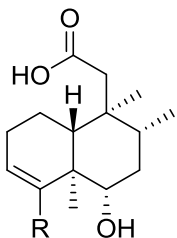

**1091-1092**

|             |                          |                    |                                |                                                  |
|-------------|--------------------------|--------------------|--------------------------------|--------------------------------------------------|
| <b>1091</b> | 18-hydroxyaylthonic acid | CH <sub>2</sub> OH | <i>Dicranopteris dichotoma</i> | <i>J. Nat. Prod.</i> , 2007, <b>70</b> , 265-268 |
| <b>1092</b> | 18-oxo-aylthonic acid    | CHO                |                                |                                                  |

**DIOSCOREA Genus**

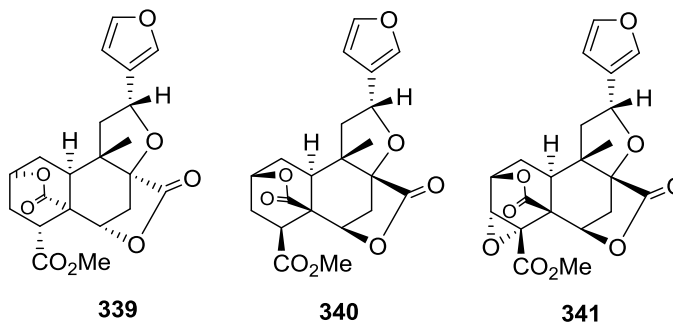

|            |                   |                            |                                                       |
|------------|-------------------|----------------------------|-------------------------------------------------------|
| <b>339</b> | bafoudiosbulbin A | <i>Dioscorea bulbifera</i> | <i>Phytochemistry</i> , 2006, <b>67</b> , 1957-1963   |
| <b>340</b> | bafoudiosbulbin D |                            | <i>Helv. Chim. Acta</i> , 2007, <b>90</b> , 1599-1605 |
| <b>341</b> | bafoudiosbulbin E |                            |                                                       |

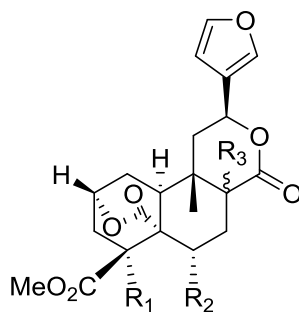

**650-653**

|            |                   | R1 | R2           | R3         |                            |                                                     |
|------------|-------------------|----|--------------|------------|----------------------------|-----------------------------------------------------|
| <b>650</b> | antadiosbulbin A  | OH | H            | $\alpha$ H | <i>Dioscorea antaly</i>    | <i>Phytochemistry</i> , 2010, <b>71</b> , 1007-1013 |
| <b>651</b> | antadiosbulbin B  | OH | H            | $\beta$ H  |                            |                                                     |
| <b>652</b> | bafoudiosbulbin F | H  | H            | $\beta$ OH | <i>Dioscorea bulbifera</i> | <i>Phytochemistry</i> , 2008, <b>69</b> , 2374-2379 |
| <b>653</b> | bafoudiosbulbin G | H  | $\alpha$ OAc | $\beta$ OH |                            |                                                     |

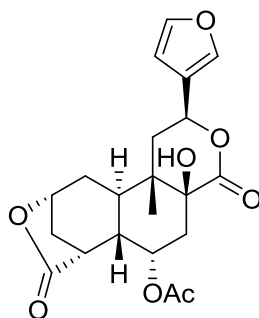

**1065**

|             |                                                                                            |                            |                                                        |
|-------------|--------------------------------------------------------------------------------------------|----------------------------|--------------------------------------------------------|
| <b>1065</b> | 15,16-epoxy-6a-O-acetyl-8 $\beta$ -hydroxy-19-nor-clero-13(16),14-diene-17,12;18,2-diolide | <i>Dioscorea bulbifera</i> | <i>Nat. Prod. Commun.</i> , 2011, <b>6</b> , 1069-1072 |
|-------------|--------------------------------------------------------------------------------------------|----------------------------|--------------------------------------------------------|

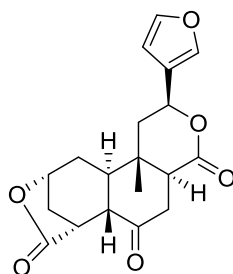

**1313**

|      |                    |                            |                                                                                                               |
|------|--------------------|----------------------------|---------------------------------------------------------------------------------------------------------------|
| 1313 | disobulbin D (DBD) | <i>Dioscorea bulbifera</i> | <i>Chem. Pharm. Bull.</i> , 1968, <b>16</b> , 2430-2435,<br><i>Phytochemistry</i> , 1984, <b>23</b> , 623-625 |
|------|--------------------|----------------------------|---------------------------------------------------------------------------------------------------------------|

**DIPLOSTEPHIUM Genus**

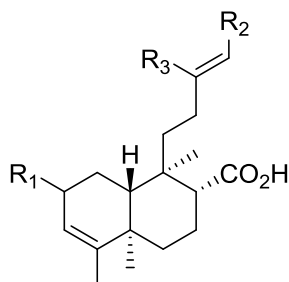

**183-185**

|            |                                                            | R1   | R2                | R3                |                                  |                                                   |
|------------|------------------------------------------------------------|------|-------------------|-------------------|----------------------------------|---------------------------------------------------|
| <b>183</b> | 16-oxo-ent-cleroda-3,13Z-diene-15,17-dioic acid            | H    | CO <sub>2</sub> H | CHO               | <i>Diplostephium floribundum</i> | <i>Phytochemistry</i> , 1992, <b>31</b> , 213-216 |
| <b>184</b> | 15-oxo-ent-cleroda-3,13Z-diene-16,17-dioic acid            | H    | CHO               | CO <sub>2</sub> H |                                  |                                                   |
| <b>185</b> | 2α-acetoxy-15-oxo-ent-cleroda-3,13Z-diene-16,17-dioic acid | αOAc | CHO               | CO <sub>2</sub> H |                                  |                                                   |

**DODONAEA Genus**

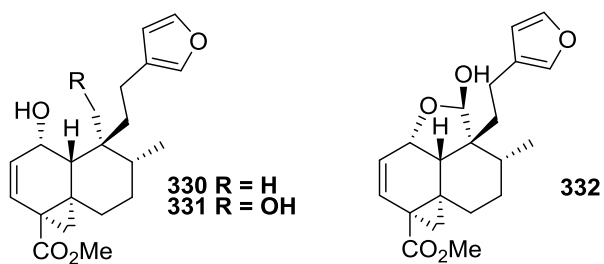

|            |                   |                         |                                                  |
|------------|-------------------|-------------------------|--------------------------------------------------|
| <b>330</b> | methyl dodonate A | <i>Dodonaea viscosa</i> | <i>Tetrahedron</i> , 2001, <b>57</b> , 2981-2989 |
| <b>331</b> | methyl dodonate B |                         |                                                  |
| <b>332</b> | methyl dodonate C |                         |                                                  |

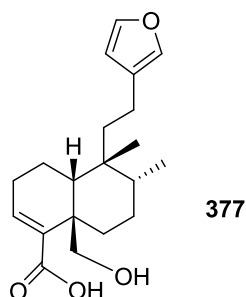

|            |                    |                         |                                                    |
|------------|--------------------|-------------------------|----------------------------------------------------|
| <b>377</b> | vishautriwaic acid | <i>Dodonaea viscosa</i> | <i>Z. Naturforsch. B</i> , 2010, <b>65</b> , 83-86 |
|------------|--------------------|-------------------------|----------------------------------------------------|

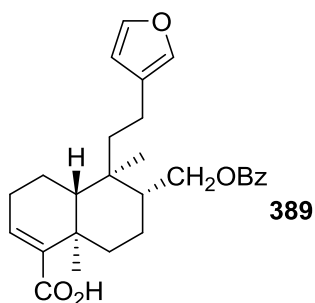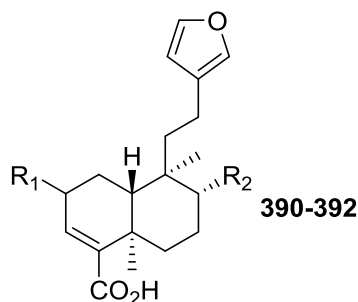

|            |                                                                                                     | R1                | R2                  |                           |                                                  |
|------------|-----------------------------------------------------------------------------------------------------|-------------------|---------------------|---------------------------|--------------------------------------------------|
| <b>389</b> | 15,16-epoxy-8 <i>R</i> -(benzoyloxy)methyl-cleroda-3,13(16),14-trien-18-oic acid                    | CO <sub>2</sub> H | CH <sub>2</sub> OBz | <i>Dodonaea polyandra</i> | <i>J. Nat. Prod.</i> , 2011, <b>74</b> , 650-657 |
| <b>390</b> | 15,16-epoxy-8 <i>R</i> -(benzoyloxy)methyl-2 <i>R</i> -hydroxycleroda-3,13(16),14-trien-18-oic acid | αOH               | CH <sub>2</sub> OBz |                           |                                                  |
| <b>391</b> | 15,16-epoxy-2 <i>R</i> -benzoyloxycleroda-3,13(16),14-trien-18-oic acid                             | αOBz              | Me                  |                           |                                                  |
| <b>392</b> | 15,16-epoxy-8 <i>R</i> -(benzoyloxy)methyl-2-oxocleroda-3,13(16),14-trien-18-oic acid               | =O                | CH <sub>2</sub> OBz |                           |                                                  |

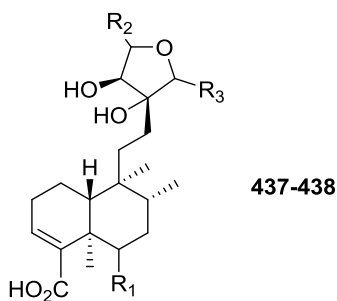

|            |                                                                                      | R1  | R2   | R3   |                         |                                                                                                         |
|------------|--------------------------------------------------------------------------------------|-----|------|------|-------------------------|---------------------------------------------------------------------------------------------------------|
| <b>437</b> | visclerodol acid                                                                     | H   | βOAc | βOAc | <i>Dodonaea viscosa</i> | <i>Z. Naturforsch. B</i> , 2010, <b>65</b> , 83-86,<br><i>Phytochem. Lett.</i> , 2014, <b>8</b> , 10-15 |
| <b>438</b> | 13,14-dihydroxy-15,16-dimethoxy-(-)-6α-hydroxy-5α,8α,9α,10α-cleroda-3-en-18-oic acid | αOH | βOMe | βOMe |                         |                                                                                                         |



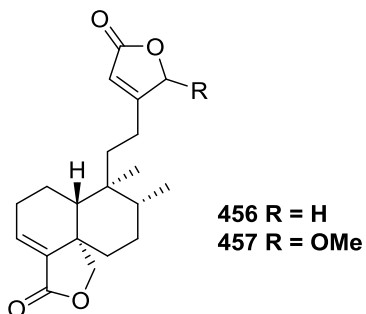

|     |                     |                              |                                                    |
|-----|---------------------|------------------------------|----------------------------------------------------|
| 456 | mkapwanin           | <i>Dodonaea angustifolia</i> | <i>Phytochem. Lett.</i> , 2010, <b>3</b> , 217–220 |
| 457 | 15-methoxymkapwanin |                              |                                                    |

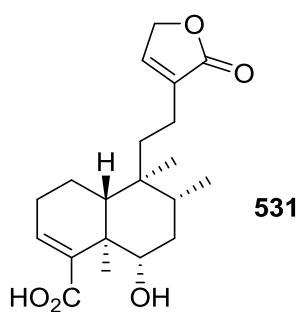

|     |                                                                                                                   |                         |                                                  |
|-----|-------------------------------------------------------------------------------------------------------------------|-------------------------|--------------------------------------------------|
| 531 | (-)-6 $\alpha$ -hydroxy-5 $\alpha$ ,8 $\alpha$ ,9 $\alpha$ ,10 $\alpha$ -cleroda-3,13-dien-16,15-olid-18-oic acid | <i>Dodonaea viscosa</i> | <i>Phytochem. Lett.</i> , 2014, <b>8</b> , 10-15 |
|-----|-------------------------------------------------------------------------------------------------------------------|-------------------------|--------------------------------------------------|

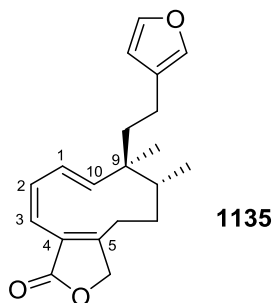

|      |            |                         |                                                  |
|------|------------|-------------------------|--------------------------------------------------|
| 1135 | dodonolide | <i>Dodonaea viscosa</i> | <i>Tetrahedron</i> , 2001, <b>57</b> , 2981-2989 |
|------|------------|-------------------------|--------------------------------------------------|

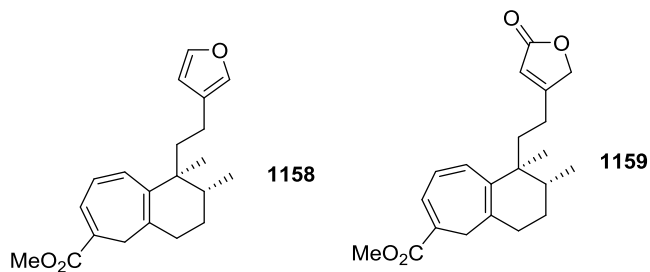

|      |                     |                         |                                                           |
|------|---------------------|-------------------------|-----------------------------------------------------------|
| 1158 | methyl dodovisate A | <i>Dodonaea viscosa</i> | <i>J. Asian. Nat. Prod. Res.</i> , 2010, <b>12</b> , 7-14 |
| 1159 | methyl dodovisate B |                         |                                                           |

**DURANTA Genus**

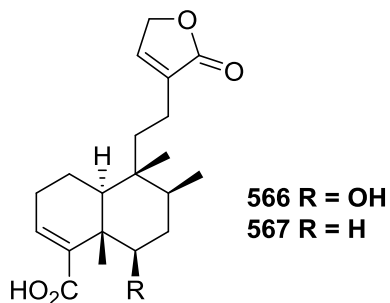

|            |                                                                      |                       |                                                       |
|------------|----------------------------------------------------------------------|-----------------------|-------------------------------------------------------|
| <b>566</b> | (-)-6β-hydroxy-5β,8β,9β,10α-cleroda-3,13-dien-16,15-olid-18-oic acid | <i>Duranta repens</i> | <i>Chem. Pharm. Bull.</i> , 2004, <b>52</b> , 785-789 |
| <b>567</b> | (+)-3,13-clerodadien-16,15-olid-18-oic acid                          |                       |                                                       |

**ECHINODORUS Genus**

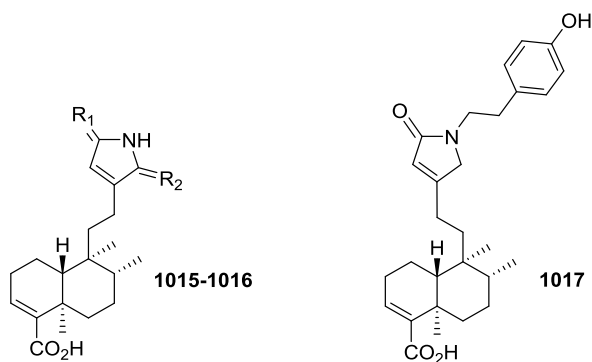

|             |                 | R1             | R2             |                                 |                                                    |
|-------------|-----------------|----------------|----------------|---------------------------------|----------------------------------------------------|
| <b>1015</b> | echinophyllin C | H <sub>2</sub> | O              | <i>Echinodorus macrophyllus</i> | <i>J. Nat. Prod.</i> , 2000, <b>63</b> , 1576-1579 |
| <b>1016</b> | echinophyllin F | O              | H <sub>2</sub> |                                 |                                                    |
| <b>1017</b> | echinophyllin D | —              | —              |                                 |                                                    |

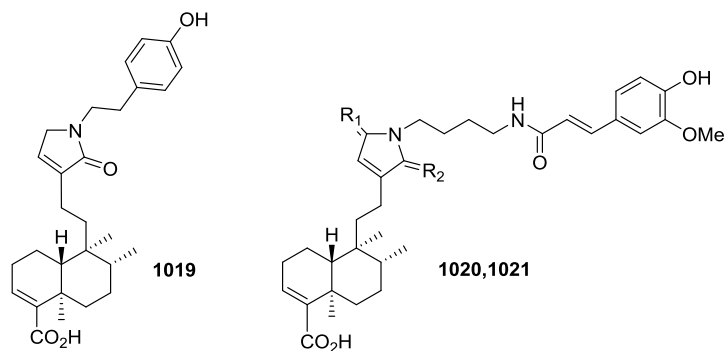

|             |                 | R1             | R2             |                                 |                                                        |
|-------------|-----------------|----------------|----------------|---------------------------------|--------------------------------------------------------|
| <b>1019</b> | echinophyllin A | —              | —              | <i>Echinodorus macrophyllus</i> | <i>Tetrahedron Lett.</i> , 2000, <b>41</b> , 2939-2943 |
| <b>1020</b> | echinophyllin B | H <sub>2</sub> | O              |                                 | <i>J. Nat. Prod.</i> , 2000, <b>63</b> , 1576-1579     |
| <b>1021</b> | echinophyllin E | O              | H <sub>2</sub> |                                 |                                                        |

**ECHINOMURICEA Genus**

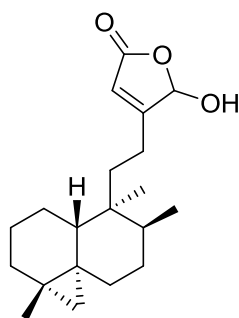

**614**

|            |                   |                         |                                                |
|------------|-------------------|-------------------------|------------------------------------------------|
| <b>614</b> | echinoclerodane A | <i>Echinomuricea</i> sp | <i>Molecules</i> , 2012, <b>17</b> , 9443-9450 |
|------------|-------------------|-------------------------|------------------------------------------------|

**ELSHOLTZIA Genus**

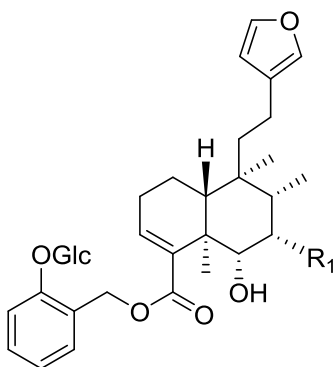

**924,925**

|            |                                                                               |    |                             |                                                     |
|------------|-------------------------------------------------------------------------------|----|-----------------------------|-----------------------------------------------------|
| <b>924</b> | 6-hydroxy-(-)-hardwickiic acid 2'- $\beta$ -D-glucopyranosyl benzyl ester     | H  | <i>Elsholtzia bodinieri</i> | <i>Indian J. Chem.</i> , 2008, <b>47B</b> , 166-170 |
| <b>925</b> | 6,7-dihydroxy-(-)-hardwickiic acid 2'- $\beta$ -D-glucopyranosyl benzyl ester | OH |                             |                                                     |

**ENTADA Genus**

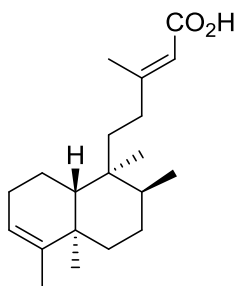

**182**

|            |                              |                          |                                                       |
|------------|------------------------------|--------------------------|-------------------------------------------------------|
| <b>182</b> | diastereoisomer of kolavenol | <i>Entada abyssinica</i> | <i>J. Ethnopharmacol.</i> , 1998, <b>61</b> , 179-183 |
|------------|------------------------------|--------------------------|-------------------------------------------------------|

**EPERUA Genus**

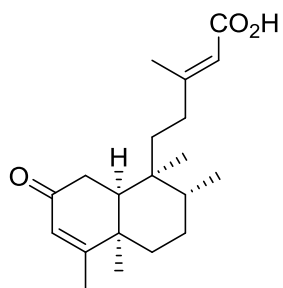

**198**

|            |                                                                             |                        |                                                     |
|------------|-----------------------------------------------------------------------------|------------------------|-----------------------------------------------------|
| <b>198</b> | (13 <i>E</i> )-2-oxo-5α- <i>cis</i> -17α,20α-cleroda-3,13-diene-15-oic acid | <i>Eperua purpurea</i> | <i>Phytochemistry</i> , 1991, <b>30</b> , 3474-3475 |
|------------|-----------------------------------------------------------------------------|------------------------|-----------------------------------------------------|

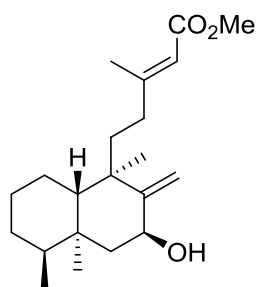

**258**

|            |                                                           |                         |                                                  |
|------------|-----------------------------------------------------------|-------------------------|--------------------------------------------------|
| <b>258</b> | (-)-7β-hydroxycleroda-8(17),13 <i>E</i> -dien-15-oic acid | <i>Eperua leucantha</i> | <i>J. Nat. Prod.</i> , 1992, <b>55</b> , 845-850 |
|------------|-----------------------------------------------------------|-------------------------|--------------------------------------------------|

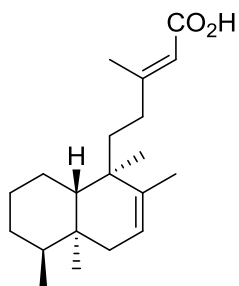

**272**

|            |                                             |                        |                                                    |
|------------|---------------------------------------------|------------------------|----------------------------------------------------|
| <b>272</b> | (-)-cleroda-7,13 <i>E</i> -dien-15-oic acid | <i>Eperua purpurea</i> | <i>J. Nat. Prod.</i> , 1993, <b>56</b> , 1586-1589 |
|------------|---------------------------------------------|------------------------|----------------------------------------------------|

**EREMOCARPUS Genus**

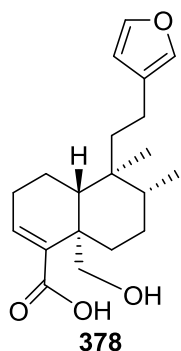

|     |                 |                              |                                                        |
|-----|-----------------|------------------------------|--------------------------------------------------------|
| 378 | hautriwaic acid | <i>Eremocarpus setigerus</i> | <i>Indian J. Chem. B</i> , 1991, <b>30</b> , 1054-1055 |
|-----|-----------------|------------------------------|--------------------------------------------------------|

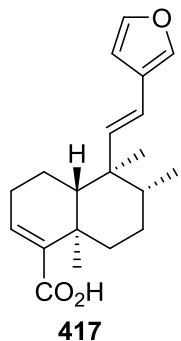

|     |                         |                              |                                                        |
|-----|-------------------------|------------------------------|--------------------------------------------------------|
| 417 | dehydrohardwickiic acid | <i>Eremocarpus setigerus</i> | <i>Indian J. Chem. B</i> , 1991, <b>30</b> , 1054-1055 |
|-----|-------------------------|------------------------------|--------------------------------------------------------|

**FIBRAUREA Genus**

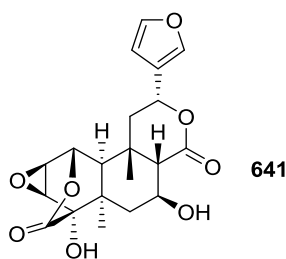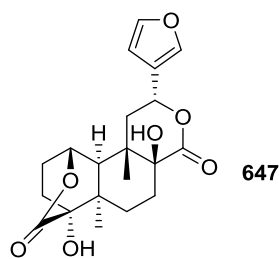

|     |                       |                            |                                                         |
|-----|-----------------------|----------------------------|---------------------------------------------------------|
| 641 | fibrauretin A         | <i>Fibraurea tinctoria</i> | <i>J. Nat. Prod.</i> , 2007, <b>70</b> , 1930-1933      |
| 647 | epi-8-hydroxycolumbin | <i>Fibraurea tinctoria</i> | <i>Bioorg. Med. Chem.</i> , 2008, <b>16</b> , 9603-9609 |

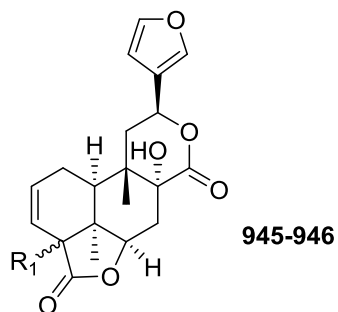

|            |                           |               |                            |                                                    |
|------------|---------------------------|---------------|----------------------------|----------------------------------------------------|
| <b>945</b> | fibrauretin A             | $\alpha$ OGlc | <i>Fibraurea tinctoria</i> | <i>J. Nat. Prod.</i> , 2007, <b>70</b> , 1930-1933 |
| <b>946</b> | <i>epi</i> -fibrauretin A | $\beta$ OGlc  |                            |                                                    |

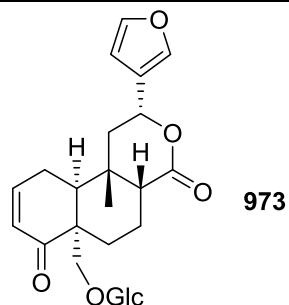

|            |                              |  |                            |                                                    |
|------------|------------------------------|--|----------------------------|----------------------------------------------------|
| <b>973</b> | <i>epi</i> -12-palmatoside G |  | <i>Fibraurea tinctoria</i> | <i>J. Nat. Prod.</i> , 2007, <b>70</b> , 1930-1933 |
|------------|------------------------------|--|----------------------------|----------------------------------------------------|

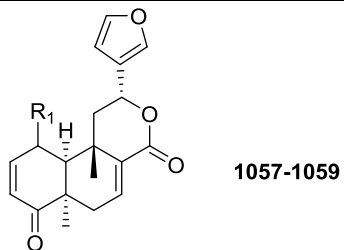

|             |               |             |                            |                                                         |
|-------------|---------------|-------------|----------------------------|---------------------------------------------------------|
| <b>1057</b> | fibaruretin D | H           | <i>Fibraurea tinctoria</i> | <i>Bioorg. Med. Chem.</i> , 2008, <b>16</b> , 9603-9609 |
| <b>1058</b> | fibaruretin E | $\alpha$ OH |                            |                                                         |
| <b>1059</b> | fibaruretin F | =O          |                            |                                                         |

**GLEICHENIA Genus**

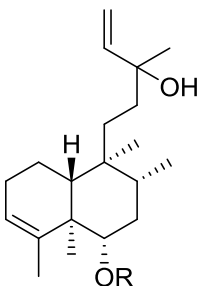

**903-904**

|            |                                                                                                                                                                                         |                                                   |                            |                                               |
|------------|-----------------------------------------------------------------------------------------------------------------------------------------------------------------------------------------|---------------------------------------------------|----------------------------|-----------------------------------------------|
| <b>903</b> | $\alpha$ -vinyl-1,2,3,4,4a,7,8,8a-octahydro- $\alpha$ ,1,2,4a,5-pentamethyl-1-naphthalenepropanol-4- <i>O</i> - $\beta$ -glucopyranoside                                                | $\beta$ -Glc                                      | <i>Gleichenia japonica</i> | <i>Chem. Lett.</i> , 1991, <b>4</b> , 701-704 |
| <b>904</b> | $\alpha$ -vinyl-1,2,3,4,4a,7,8,8a-octahydro- $\alpha$ ,1,2,4a,5-pentamethyl-1-naphthalenepropanol-4- <i>O</i> - $\alpha$ -rhamnopyranosyl-(1 $\rightarrow$ 2)- $\beta$ -glucopyranoside | $\beta$ -Glc-(2 $\rightarrow$ 1)- $\alpha$ -L-Rha |                            |                                               |

**GLOSSOCARYA Genus**

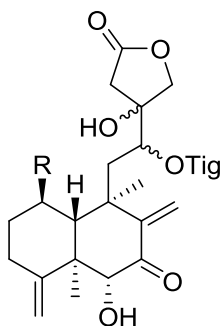

**598-600**

|            |              |      |                              |                                                     |
|------------|--------------|------|------------------------------|-----------------------------------------------------|
| <b>598</b> | calcicolin A | OiBu | <i>Glossocarya calcicola</i> | <i>Phytochemistry</i> , 2005, <b>66</b> , 2844-2850 |
| <b>599</b> | calcicolin B | OTig |                              |                                                     |
| <b>600</b> | calcicolin C | Y1   |                              |                                                     |



**GOMPHOSTEMMA Genus**

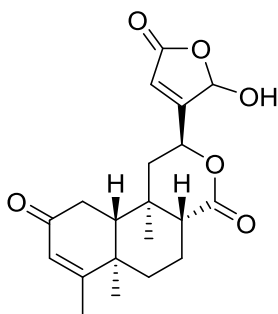

**527**

|            |            |                              |                                                                      |
|------------|------------|------------------------------|----------------------------------------------------------------------|
| <b>527</b> | microdon B | <i>Gomphostemma microdon</i> | <i>Z. Naturforsch., B: J. Chem. Sci.</i> , 2009, <b>64</b> , 443-446 |
|------------|------------|------------------------------|----------------------------------------------------------------------|

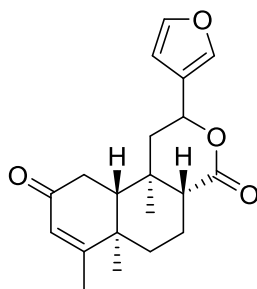

**656**

|            |            |                              |                                                                      |
|------------|------------|------------------------------|----------------------------------------------------------------------|
| <b>656</b> | microdon A | <i>Gomphostemma microdon</i> | <i>Z. Naturforsch., B: J. Chem. Sci.</i> , 2009, <b>64</b> , 443-446 |
|------------|------------|------------------------------|----------------------------------------------------------------------|

**GOTTSCHELIA Genus**

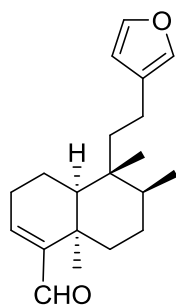

**401**

|            |                                                                                                             |                                 |                                                  |
|------------|-------------------------------------------------------------------------------------------------------------|---------------------------------|--------------------------------------------------|
| <b>401</b> | (5 <i>R</i> ,8 <i>S</i> ,9 <i>R</i> ,10 <i>S</i> )-15,16-epoxy- <i>cis</i> -cleroda-3,13(16),14-trien-18-al | <i>Gottschelia schizopleura</i> | <i>Planta Med.</i> , 2009, <b>75</b> , 1597-1601 |
|------------|-------------------------------------------------------------------------------------------------------------|---------------------------------|--------------------------------------------------|

**GRANGEA Genus**

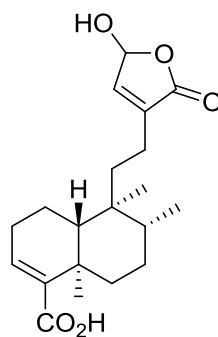

**532**

|            |                                           |                              |                                                     |
|------------|-------------------------------------------|------------------------------|-----------------------------------------------------|
| <b>532</b> | 15-hydroxy-16-oxo-15,16H-hardwickiic acid | <i>Grangea maderaspatana</i> | <i>Phytochemistry</i> , 1999, <b>52</b> , 1341-1343 |
|------------|-------------------------------------------|------------------------------|-----------------------------------------------------|

**GUAREA Genus**

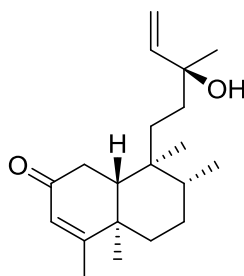

**246**

|            |                                         |                             |                                                     |
|------------|-----------------------------------------|-----------------------------|-----------------------------------------------------|
| <b>246</b> | (-)-2-oxo-13-hydroxy-3,14-clerodandiene | <i>Guarea trichilioides</i> | <i>Phytochemistry</i> , 1996, <b>41</b> , 1159-1161 |
|------------|-----------------------------------------|-----------------------------|-----------------------------------------------------|

**HALOPHILA-SYPHONOTA Genus**

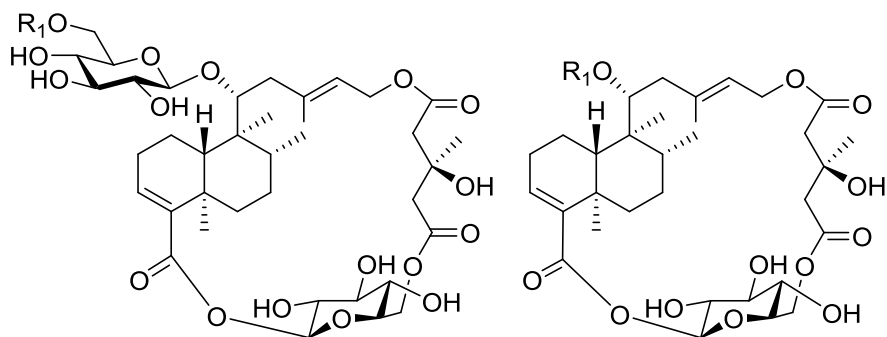

**978,979**

**980,981**

|            |                               |                          |                                                               |                                                       |
|------------|-------------------------------|--------------------------|---------------------------------------------------------------|-------------------------------------------------------|
| <b>978</b> | syphonoside                   | H                        | <i>Syphonota geographica</i> ,<br><i>Halophila stipulacea</i> | <i>J. Org. Chem.</i> , 2007,<br><b>72</b> , 5625-5630 |
| <b>979</b> | 6'''-acetyl syphonoside       | Ac                       |                                                               | <i>Tetrahedron</i> , 2008, <b>64</b> ,<br>191-196     |
| <b>980</b> | syphonosideol                 | H                        |                                                               |                                                       |
| <b>981</b> | mixture of syphonoside esters | palmitic & stearic acids |                                                               |                                                       |

**HAPLOPAPPUS Genus**

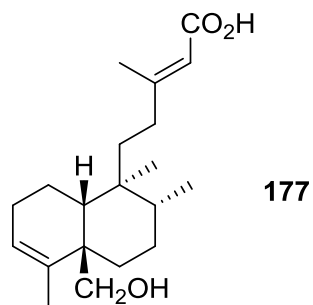

|            |                     |                                |                                                     |
|------------|---------------------|--------------------------------|-----------------------------------------------------|
| <b>177</b> | deserticolinic acid | <i>Haplopappus deserticola</i> | <i>Phytochemistry</i> , 1999, <b>52</b> , 1531-1533 |
|------------|---------------------|--------------------------------|-----------------------------------------------------|

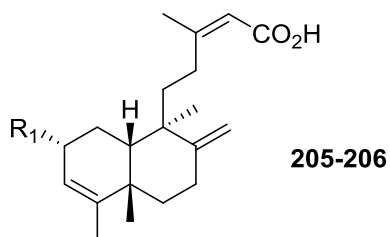

|            |                                               |    |                    |                            |
|------------|-----------------------------------------------|----|--------------------|----------------------------|
| <b>205</b> | 2α-hydroxy- <i>cis</i> -cleroda-3,13(Z),8,17- | OH | <i>Haplopappus</i> | <i>Planta Med.</i> , 2003, |
|------------|-----------------------------------------------|----|--------------------|----------------------------|

|            |                                                                         |     |                 |                     |
|------------|-------------------------------------------------------------------------|-----|-----------------|---------------------|
|            | trien-15-oic acid                                                       |     | <i>foliosus</i> | <b>69</b> , 675-677 |
| <b>206</b> | 2 $\alpha$ -acetoxy- <i>cis</i> -cleroda-3,13(Z),8,17-trien-15-oic acid | OAc |                 |                     |

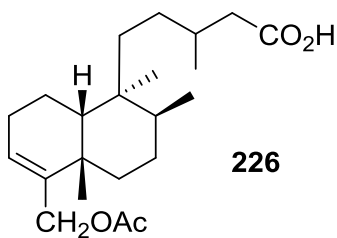

|            |                                                  |                              |                                                        |
|------------|--------------------------------------------------|------------------------------|--------------------------------------------------------|
| <b>226</b> | 18-acetoxy- <i>cis</i> -cleroda-3-en-15-oic acid | <i>Haplopappus uncinatus</i> | <i>J. Ethnopharmacol.</i> , 2006, <b>103</b> , 297-301 |
|------------|--------------------------------------------------|------------------------------|--------------------------------------------------------|

### **HETEROSCYPHUS Genus**

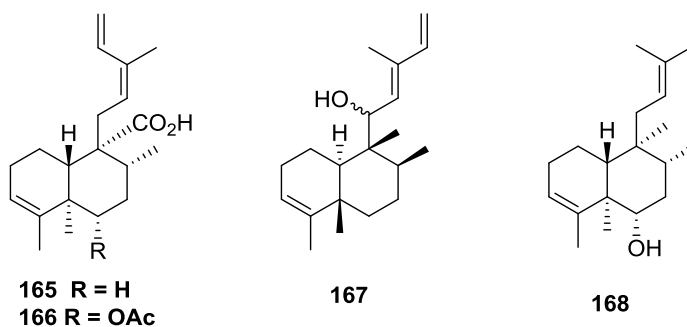

|            |                                            |                                   |                                                       |
|------------|--------------------------------------------|-----------------------------------|-------------------------------------------------------|
| <b>165</b> | heteroscyphic acid A                       | <i>Heteroscyphus planus</i>       | <i>Phytochemistry</i> , 1994, <b>37</b> , 1263-1268   |
| <b>166</b> | heteroscyphic acid B                       |                                   |                                                       |
| <b>167</b> | heteroscyphol                              |                                   | <i>Phytochemistry</i> , 1995, <b>38</b> , 119-127     |
| <b>168</b> | 6 $\alpha$ -hydroxy-3,12E,14-clerodatriene | <i>Heteroscyphus billardierii</i> | <i>Chem. Pharm. Bull.</i> , 2004, <b>52</b> , 556-560 |

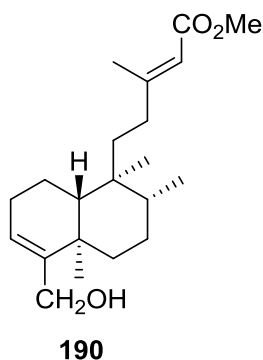

|            |                                                                            |                             |                                                   |
|------------|----------------------------------------------------------------------------|-----------------------------|---------------------------------------------------|
| <b>190</b> | 18-hydroxy-5,10- <i>trans</i> -cleroda-3,13E-dien-15-oic acid methyl ester | <i>Heteroscyphus planus</i> | <i>Phytochemistry</i> , 1996, <b>41</b> , 581-587 |
|------------|----------------------------------------------------------------------------|-----------------------------|---------------------------------------------------|

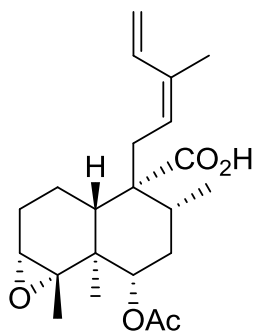

**292**

|            |                      |                             |                                                     |
|------------|----------------------|-----------------------------|-----------------------------------------------------|
| <b>292</b> | heteroscyphic acid C | <i>Heteroscyphus planus</i> | <i>Phytochemistry</i> , 1994, <b>37</b> , 1263-1268 |
|------------|----------------------|-----------------------------|-----------------------------------------------------|

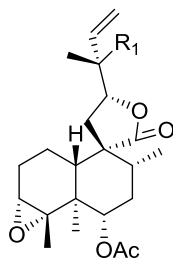

**768-769**

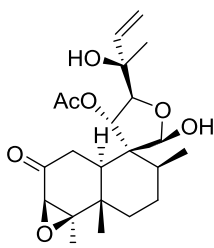

**770**

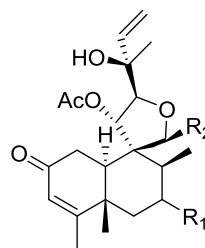

**771-773**

|            |                    |             |            |                             |                                                   |
|------------|--------------------|-------------|------------|-----------------------------|---------------------------------------------------|
| <b>768</b> | heteroscypholide A | $\beta$ OAc | —          | <i>Heteroscyphus planus</i> | <i>Phytochemistry</i> , 1996, <b>41</b> , 581-587 |
| <b>769</b> | heteroscypholide B | $\beta$ OH  | —          |                             |                                                   |
| <b>770</b> | heteroscyphone A   | —           | —          | <i>Heteroscyphus planus</i> | <i>Phytochemistry</i> , 1995, <b>38</b> , 119-127 |
| <b>771</b> | heteroscyphone B   | H           | $\beta$ OH |                             |                                                   |
| <b>772</b> | heteroscyphone C   | H           | H          |                             |                                                   |
| <b>773</b> | heteroscyphone D   | $\beta$ OH  | $\beta$ OH |                             |                                                   |

**HYMENAEA Genus**

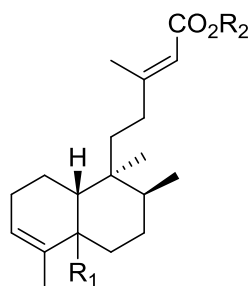

**195** R<sub>1</sub> = α-Me, R<sub>2</sub> = H

**196** R<sub>1</sub> = β-Me, R<sub>2</sub> = Me

|            |                                                   |                           |                                                     |
|------------|---------------------------------------------------|---------------------------|-----------------------------------------------------|
| <b>195</b> | (-)-(5R,8S,9S,10R)-cleroda-3,13E-dien-15-oic acid | <i>Hymenaea courbaril</i> | <i>Phytochemistry</i> , 2001, <b>58</b> , 1153-1157 |
| <b>196</b> | methyl (5S,8S,9S,10R)-cleroda-3,13E-dien-15-oate  |                           |                                                     |

**JAMESONIELLA Genus**

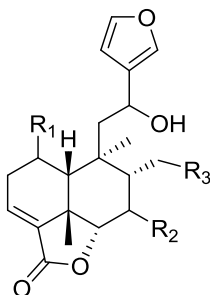

**310-313**

|            |                                                                                                | R1   | R2  | R3  |                                |                                                                                                                                                              |
|------------|------------------------------------------------------------------------------------------------|------|-----|-----|--------------------------------|--------------------------------------------------------------------------------------------------------------------------------------------------------------|
| <b>311</b> | 1β-acetoxy-12-hydroxy-15,16-epoxy- <i>cis</i> -cleroda-3,13(16),14-triene-18,16-olide          | βOAc | H   | H   | <i>Jamesoniella autumnalis</i> | <i>Phytochemistry</i> , 1995, <b>39</b> , 859-868,<br><i>Phytochemistry</i> , 1998, <b>48</b> , 681-685,<br><i>J. Nat. Prod.</i> , 1992, <b>55</b> , 111-121 |
| <b>312</b> | 1β-acetoxy-7,12-dihydroxy-15,16-epoxy- <i>cis</i> -cleroda-3,13(16),14-triene-18,6-olide       | βOAc | βOH | H   |                                |                                                                                                                                                              |
| <b>313</b> | 17-acetoxy-1β,12-dihydroxy-15,16-epoxy- <i>cis-ent</i> -cleroda-3,13(16),14-triene-6α,18-olide | βOH  | H   | OAc |                                |                                                                                                                                                              |

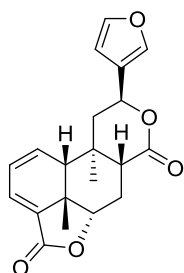

638

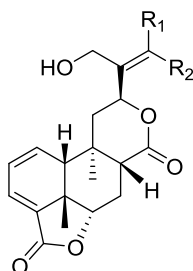

639 R1 = CO<sub>2</sub>H, R2 = H  
640 R1 = H, R2 = CO<sub>2</sub>H

|     |                                                                                      |                                |                                                   |
|-----|--------------------------------------------------------------------------------------|--------------------------------|---------------------------------------------------|
| 638 | 15,16-epoxy,1,3,13(16),14-clerodatetraene-17,12:18,6-diolide                         | <i>Jamesoniella autumnalis</i> | <i>Phytochemistry</i> , 1998, <b>48</b> , 681-685 |
| 639 | 15-carboxy-8 $\beta$ ,16-dihydroxy-1,3,13 <i>E</i> -clerodatriene-17,12:18,6-diolide |                                |                                                   |
| 640 | 15-carboxy-8 $\beta$ ,16-dihydroxy-1,3,13 <i>Z</i> -clerodatriene-17,12:18,6-diolide |                                |                                                   |

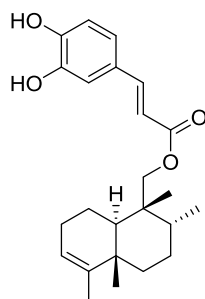

1097

|      |   |                              |                                                       |
|------|---|------------------------------|-------------------------------------------------------|
| 1097 | — | <i>Jamesoniella colorata</i> | <i>Nat. Prod. Commun.</i> , 2010, <b>5</b> , 999-1003 |
|------|---|------------------------------|-------------------------------------------------------|

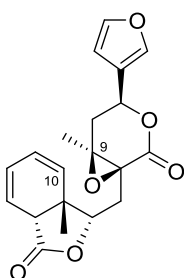

1098

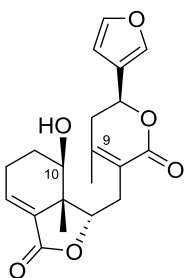

1099

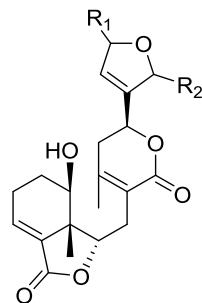

1100,1101

|      |                  |    |    |                                |                                                                                                         |
|------|------------------|----|----|--------------------------------|---------------------------------------------------------------------------------------------------------|
| 1098 | jamesoniellide F | —  | —  | <i>Jamesoniella autumnalis</i> | <i>Phytochemistry</i> , 1995, <b>39</b> , 859-868,<br><i>Phytochemistry</i> , 1999, <b>51</b> , 743-750 |
| 1099 | jamesoniellide I | —  | —  |                                |                                                                                                         |
| 1100 | jamesoniellide K | OH | =O | <i>Jamesoniella colorata</i>   | <i>Phytochemistry</i> , 2003, <b>63</b> , 227-233                                                       |
| 1101 | jamesoniellide L | =O | OH |                                |                                                                                                         |

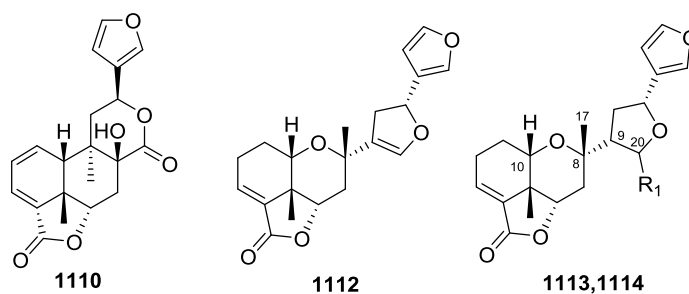

|             |                                                                        |             |                                |                                                    |
|-------------|------------------------------------------------------------------------|-------------|--------------------------------|----------------------------------------------------|
| <b>1110</b> | 15,16-epoxy-8-hydroxy-1,3,13(16),14-clerodatetraene-17,12:18,6-diolide | —           | <i>Jamesoniella autumnalis</i> | <i>Phytochemistry</i> , 1995, <b>39</b> , 859-868  |
| <b>1112</b> | jamesoniellide D                                                       | —           |                                | <i>Phytochemistry</i> , 1995, <b>39</b> , 859-868, |
| <b>1113</b> | jamesoniellide E                                                       | =O          |                                | <i>Phytochemistry</i> , 1999, <b>51</b> , 743-750  |
| <b>1114</b> | jamesoniellide H                                                       | $\alpha$ OH |                                |                                                    |

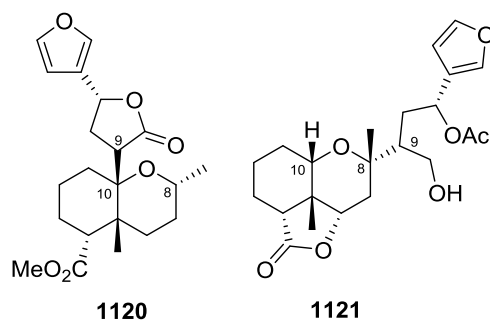

|             |                  |                                |                                                  |
|-------------|------------------|--------------------------------|--------------------------------------------------|
| <b>1120</b> | jamesoniellide A | <i>Jamesoniella autumnalis</i> | <i>J. Nat. Prod.</i> , 1992, <b>55</b> , 111-121 |
| <b>1121</b> | jamesoniellide B |                                |                                                  |

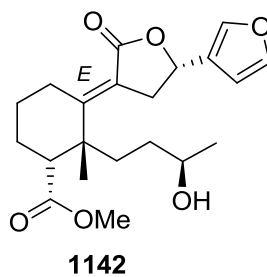

|             |                  |                                |                                                   |
|-------------|------------------|--------------------------------|---------------------------------------------------|
| <b>1142</b> | jamesoniellide J | <i>Jamesoniella autumnalis</i> | <i>Phytochemistry</i> , 1999, <b>51</b> , 743-750 |
|-------------|------------------|--------------------------------|---------------------------------------------------|



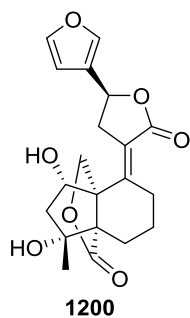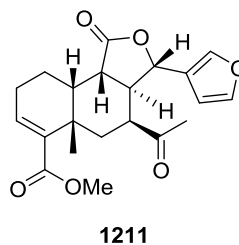

|             |                  |                                |                                                       |
|-------------|------------------|--------------------------------|-------------------------------------------------------|
| <b>1200</b> | jamesoniellide C | <i>Jamesoniella autumnalis</i> | <i>Phytochemistry</i> , 1994, <b>37</b> , 491-494     |
| <b>1211</b> | cephaloziellin Q | <i>Jamesoniella colorata</i>   | <i>Nat. Prod. Commun.</i> , 2010, <b>5</b> , 999-1003 |

**JUNGERMANNIA Genus**

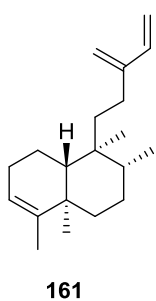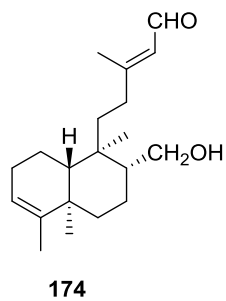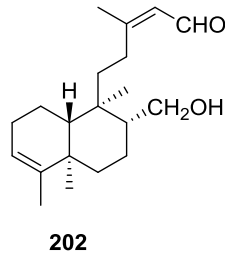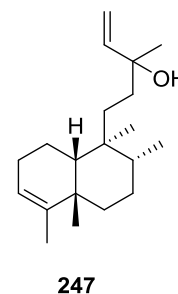

|            |                                             |                             |                                                         |
|------------|---------------------------------------------|-----------------------------|---------------------------------------------------------|
| <b>161</b> | <i>ent</i> -clerod-3,13(16),14-triene       | <i>Jungermannia infusca</i> | <i>Phytochemistry</i> , 1998, <b>49</b> , 601-608       |
| <b>174</b> | 17-hydroxy-3,13 <i>E</i> -clerodadien-15-al |                             | <i>Chem. Pharm. Bull.</i> , 2000, <b>48</b> , 1818-1821 |
| <b>202</b> | 17-hydroxy-3,13 <i>Z</i> -clerodadien-15-al |                             | <i>J. Nat. Prod.</i> , 2001, <b>64</b> , 1309-1317      |
| <b>247</b> | <i>cis</i> -3,14-clerodadien-13-ol          |                             |                                                         |

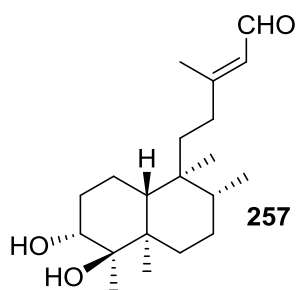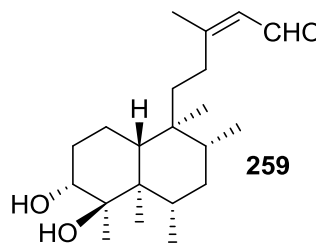

|            |                                                               |                             |                                                   |
|------------|---------------------------------------------------------------|-----------------------------|---------------------------------------------------|
| <b>257</b> | 3 <i>R</i> ,4 <i>R</i> -dihydroxyclerod-13 <i>E</i> -en-15-al | <i>Jungermannia hyalina</i> | <i>Phytochemistry</i> , 1995, <b>40</b> , 209-212 |
| <b>259</b> | 3 <i>R</i> ,4 <i>R</i> -dihydroxyclerod-13 <i>Z</i> -en-15-al |                             |                                                   |

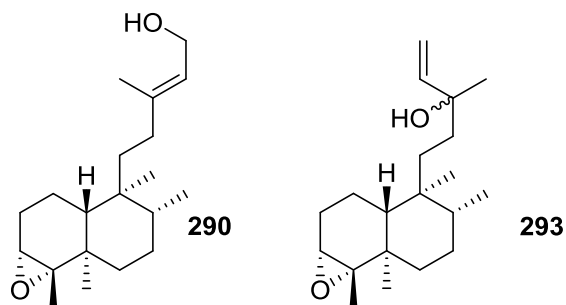

|            |                                            |                             |                                                     |
|------------|--------------------------------------------|-----------------------------|-----------------------------------------------------|
| <b>290</b> | <i>ent-3β,4β-epoxyclerod-13E-en-15-ol</i>  | <i>Jungermannia hyalina</i> | <i>Phytochemistry</i> , 1995, <b>40</b> , 209-212   |
| <b>293</b> | <i>ent-3β,4β-epoxy-clerod-14-en-13ζ-ol</i> | <i>Jungermannia paroica</i> | <i>Phytochemistry</i> , 1992, <b>31</b> , 1420-1421 |

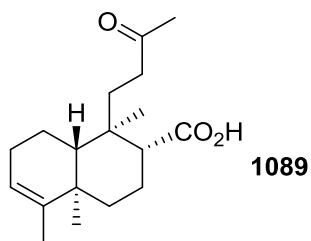

|             |                       |                             |                                                   |
|-------------|-----------------------|-----------------------------|---------------------------------------------------|
| <b>1089</b> | bis-norinfuscaic acid | <i>Jungermannia infusca</i> | <i>Phytochemistry</i> , 1998, <b>49</b> , 601-608 |
|-------------|-----------------------|-----------------------------|---------------------------------------------------|

### LAETIA Genus

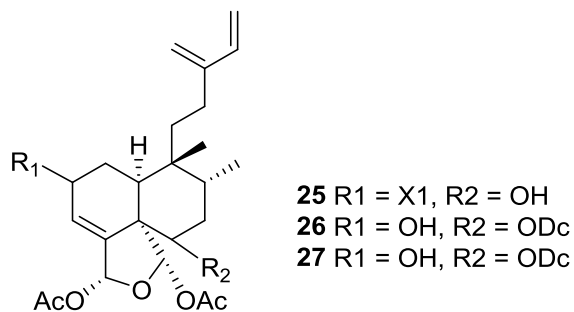

|           |                |                           |                                                   |
|-----------|----------------|---------------------------|---------------------------------------------------|
| <b>25</b> | corymbulosin A | <i>Laetia corymbulosa</i> | <i>Phytochemistry</i> , 2000, <b>55</b> , 233-236 |
| <b>26</b> | corymbulosin B |                           |                                                   |
| <b>27</b> | corymbulosin C |                           |                                                   |

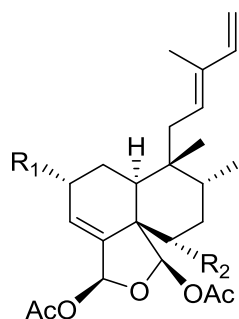

- 101** R<sub>1</sub> = Y<sub>1</sub>, R<sub>2</sub> = OH  
**102** R<sub>1</sub> = OiBu, R<sub>2</sub> = OBz  
**103** R<sub>1</sub> = Y<sub>1</sub>, R<sub>2</sub> = OBz

|            |                   |                       |                                                               |
|------------|-------------------|-----------------------|---------------------------------------------------------------|
| <b>101</b> | laetiaprocerine A | <i>Laetia procera</i> | <i>Bioorg. Med. Chem. Lett.</i> , 2005, <b>15</b> , 5065–5070 |
| <b>102</b> | laetiaprocerine B |                       |                                                               |
| <b>103</b> | laetiaprocerine C |                       |                                                               |

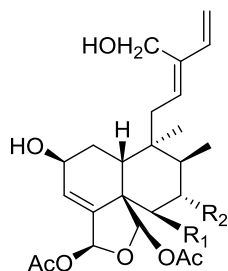

- 129** R<sub>1</sub> = OMyr, R<sub>2</sub> = OH  
**130** R<sub>1</sub> = OPal, R<sub>2</sub> = OH  
**131** R<sub>1</sub> = OH, R<sub>2</sub> = OMyr  
**132** R<sub>1</sub> = OH, R<sub>2</sub> = OPal

|            |                                                                                                                                                                                                                      |                       |                                                   |
|------------|----------------------------------------------------------------------------------------------------------------------------------------------------------------------------------------------------------------------|-----------------------|---------------------------------------------------|
| <b>129</b> | <i>rel</i> -18( <i>S</i> ),19( <i>R</i> )-diacetoxy-18,19-epoxy-2( <i>R</i> ),7( <i>S</i> ),16-trihydroxy-6( <i>S</i> )-myristoyloxy-5( <i>R</i> ),8( <i>R</i> ),9( <i>S</i> ),10( <i>R</i> )-cleroda-3,12,14-triene | <i>Laetia procera</i> | <i>Phytochemistry</i> , 1996, <b>43</b> , 635-638 |
| <b>130</b> | <i>rel</i> -18( <i>S</i> ),19( <i>R</i> )-diacetoxy-18,19-epoxy-2( <i>R</i> ),7( <i>S</i> ),16-trihydroxy-6( <i>S</i> )-palmitoyloxy-5( <i>R</i> ),8( <i>R</i> ),9( <i>S</i> ),10( <i>R</i> )-cleroda-3,12,14-triene |                       |                                                   |
| <b>131</b> | <i>rel</i> -18( <i>S</i> ),19( <i>R</i> )-diacetoxy-18,19-epoxy-2( <i>R</i> ),6( <i>S</i> ),16-trihydroxy-7( <i>S</i> )-myristoyloxy-5( <i>R</i> ),8( <i>R</i> ),9( <i>S</i> ),10( <i>R</i> )-cleroda-3,12,14-triene |                       |                                                   |
| <b>132</b> | <i>rel</i> -18( <i>S</i> ),19( <i>R</i> )-diacetoxy-18,19-epoxy-2( <i>R</i> ),7( <i>S</i> ),16-trihydroxy-6( <i>S</i> )-palmitoyloxy-5( <i>R</i> ),8( <i>R</i> ),9( <i>S</i> ),10( <i>R</i> )-cleroda-3,12,14-triene |                       |                                                   |

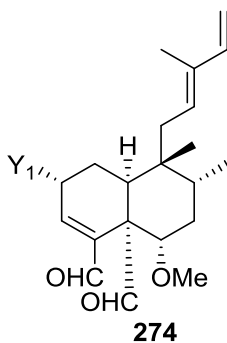

|            |                   |                       |                                                               |
|------------|-------------------|-----------------------|---------------------------------------------------------------|
| <b>274</b> | laetiaprocerine D | <i>Laetia procera</i> | <i>Bioorg. Med. Chem. Lett.</i> , 2005, <b>15</b> , 5065–5070 |
|------------|-------------------|-----------------------|---------------------------------------------------------------|

**LEONURUS Genus**

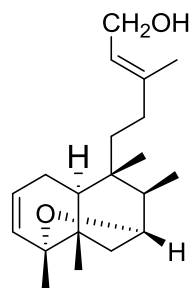

**276**

|            |              |                           |                                                      |
|------------|--------------|---------------------------|------------------------------------------------------|
| <b>276</b> | leojaponin A | <i>Leonurus japonicus</i> | <i>Chin. Chem. Lett.</i> , 2014, <b>25</b> , 677-679 |
|------------|--------------|---------------------------|------------------------------------------------------|

**LICANIA Genus**

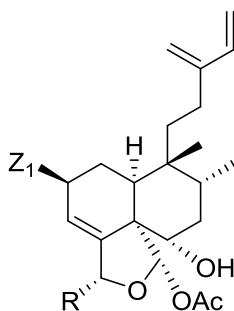

**35** R = OMe  
**36** R = OAc

|           |                |                                |                                                  |
|-----------|----------------|--------------------------------|--------------------------------------------------|
| <b>35</b> | intrapetacin A | <i>Licania intrapetiolaris</i> | <i>J. Nat. Prod.</i> , 2001, <b>64</b> , 497-501 |
| <b>36</b> | intrapetacin B |                                |                                                  |

**MICROGLOSSA Genus**

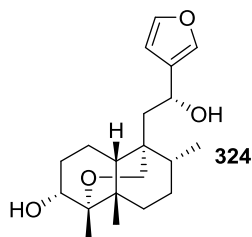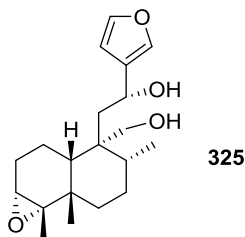

|            |                                                                                                            |                                |                                                     |
|------------|------------------------------------------------------------------------------------------------------------|--------------------------------|-----------------------------------------------------|
| <b>324</b> | 3 $\alpha$ ,12-dihydroxy-4 $\alpha$ ,20,15,16-bisepoxy-8 $\beta$ ,10 $\beta$ H-ent-cleroda-13(16),14-diene | <i>Microglossa pyrrhopappa</i> | <i>Phytochemistry</i> , 1990, <b>29</b> , 3233-3241 |
| <b>325</b> | 12,20-dihydroxy-3 $\alpha$ ,4 $\alpha$ ,15,16-bisepoxy-8 $\beta$ ,10 $\beta$ H-ent-cleroda-13(16),14-diene |                                |                                                     |

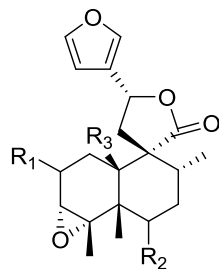

760-763

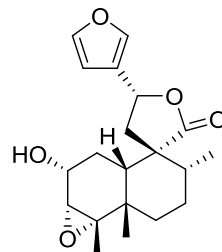

767

|     |                                                                                                                                             | R1          | R2           | R3 |                                |                                                     |
|-----|---------------------------------------------------------------------------------------------------------------------------------------------|-------------|--------------|----|--------------------------------|-----------------------------------------------------|
| 760 | 2 $\alpha$ -hydroxy-3 $\alpha$ ,4 $\alpha$ ,15,16-bis-epoxy-8 $\beta$ ,10 $\beta$ H- <i>ent</i> -cleroda-13(16),14-diene-20,12-olide        | $\alpha$ OH | H            | H  | <i>Microglossa pyrrhopappa</i> | <i>Phytochemistry</i> , 1990, <b>29</b> , 3233-3241 |
| 761 | 6 $\beta$ ,10 $\beta$ -dihydroxy-3 $\alpha$ ,4 $\alpha$ ,15,16-bis-epoxy-8 $\beta$ H-cleroda-13(16),14-diene-20,12-olide                    | H           | $\beta$ OH   | OH |                                |                                                     |
| 762 | 6 $\beta$ -angeloyloxy-10 $\beta$ -hydroxy-3 $\alpha$ ,4 $\alpha$ ,15,16-bis-epoxy-8 $\beta$ H-cleroda-13(16),14-diene-20,12-olide          | H           | $\beta$ OAng | OH |                                |                                                     |
| 763 | 6 $\beta$ -[2-methylbutyryloxy]-10 $\beta$ -hydroxy-3 $\alpha$ ,4 $\alpha$ ,15,16-bis-epoxy-8 $\beta$ H-cleroda-13(16),14-diene-20,12-olide | H           | $\beta$ MeBu | OH |                                |                                                     |
| 767 | 2 $\alpha$ -hydroxy-3 $\alpha$ ,4 $\alpha$ ,15,16-bis-epoxy-8 $\beta$ H- <i>ent</i> -cleroda-1(10),13(16),14-diene-20,12-olide              | —           | —            | —  |                                |                                                     |

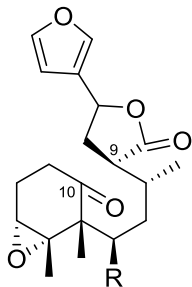

1104-1109

|      |                                                 | R     |                                |                                                     |
|------|-------------------------------------------------|-------|--------------------------------|-----------------------------------------------------|
| 1104 | pyrrhopappolide                                 | H     | <i>Microglossa pyrrhopappa</i> | <i>Phytochemistry</i> , 1990, <b>29</b> , 3233-3241 |
| 1105 | 6 $\beta$ -hydroxypyrrhopappolide               | OH    |                                |                                                     |
| 1106 | 6 $\beta$ -angeloyloxy-pyrrhopappolide          | OAng  |                                |                                                     |
| 1107 | 6 $\beta$ -seneciolyloxy-pyrrhopappolide        | OSen  |                                |                                                     |
| 1108 | 6 $\beta$ -tigloyloxy-pyrrhopappolide           | OTig  |                                |                                                     |
| 1109 | 6 $\beta$ -[2-methylbutyryloxy]-pyrrhopappolide | OMeBu |                                |                                                     |

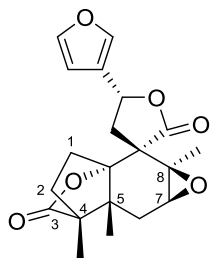

1182

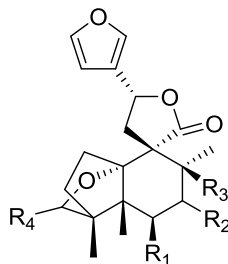

1183-1187

|      |                                               | R1    | R2    | R3 | R4 |                                |                                                     |
|------|-----------------------------------------------|-------|-------|----|----|--------------------------------|-----------------------------------------------------|
| 1182 | 7β,8β-epoxyisochiliolide lactone              | —     | —     | —  | —  | <i>Microglossa pyrrhopappa</i> | <i>Phytochemistry</i> , 1990, <b>29</b> , 3233-3241 |
| 1183 | 6β-angeloyloxyisochiliolide lactone           | OAng  | H     | H  | =O |                                |                                                     |
| 1184 | 6β-[2-methylbutyryloxy]-isochiliolide lactone | OMeBu | H     | H  | =O |                                |                                                     |
| 1185 | 8β-hydroxyisochiliolide lactone               | H     | H     | OH | =O |                                |                                                     |
| 1186 | isochiliolide lactone                         | H     | H     | H  | =O |                                |                                                     |
| 1187 | 7β-angeloyloxyisochiliolide lactone           | H     | βOAng | βH | =O |                                |                                                     |

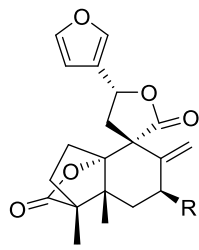

1191 R = H  
1192 R = OAc

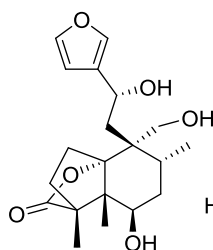

1193

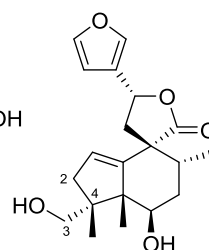

1194

|      |                                               |                                |                                                     |
|------|-----------------------------------------------|--------------------------------|-----------------------------------------------------|
| 1191 | 8(17)-dehydroisochiliolide lactone            | <i>Microglossa pyrrhopappa</i> | <i>Phytochemistry</i> , 1990, <b>29</b> , 3233-3241 |
| 1192 | 7β-acetoxy-8(17)-dehydroisochiliolide lactone |                                |                                                     |
| 1193 | 6β-hydroxyisochiliolide                       |                                |                                                     |
| 1194 | 6β-hydroxy-incana-pteroniolide                |                                |                                                     |

**MUSA Genus**

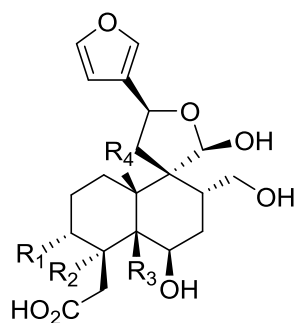

**791-793**

|            |                  |      |                    |                    |                    |                        |                                                     |
|------------|------------------|------|--------------------|--------------------|--------------------|------------------------|-----------------------------------------------------|
| <b>791</b> | musabalbisiene A | OH   | CO <sub>2</sub> H  | CHO                | CHO                | <i>Musa balbisiana</i> | <i>Phytochemistry</i> , 1992, <b>31</b> , 2173-2175 |
| <b>792</b> | musabalbisiene B | OH   | CHO                | CO <sub>2</sub> H  | CH <sub>2</sub> OH |                        |                                                     |
| <b>793</b> | musabalbisiene C | OAng | CH <sub>2</sub> OH | CH <sub>2</sub> OH | CH <sub>2</sub> OH |                        |                                                     |

**NANNOGLOTTIS Genus**

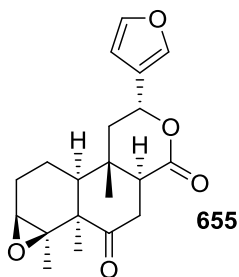

|            |           |                            |                                                     |
|------------|-----------|----------------------------|-----------------------------------------------------|
| <b>655</b> | ravidin A | <i>Nannoglottis ravida</i> | <i>Phytochemistry</i> , 2004, <b>65</b> , 2533-2537 |
|------------|-----------|----------------------------|-----------------------------------------------------|

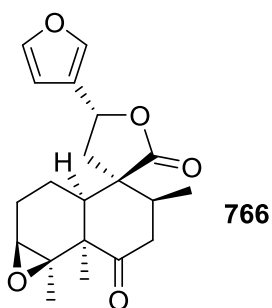

|            |           |                            |                                                     |
|------------|-----------|----------------------------|-----------------------------------------------------|
| <b>766</b> | ravidin B | <i>Nannoglottis ravida</i> | <i>Phytochemistry</i> , 2004, <b>65</b> , 2533-2537 |
|------------|-----------|----------------------------|-----------------------------------------------------|

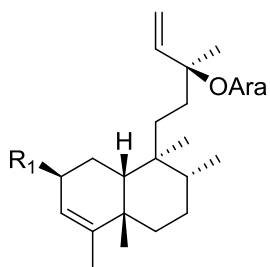

907-909

|     |                                                                                                                                                                 |     |                                  |                                              |
|-----|-----------------------------------------------------------------------------------------------------------------------------------------------------------------|-----|----------------------------------|----------------------------------------------|
| 907 | (5 <i>S</i> ,8 <i>R</i> ,9 <i>S</i> ,10 <i>R</i> ,13 <i>S</i> )-10βH-13- <i>O</i> -α-L-arabinopyranosyl-2-oxo-17α,19β,20α-trimethyl-3,14-clerodadiene           | =O  | <i>Nannoglottis carpesioides</i> | <i>Fitoterapia</i> , 2014, <b>93</b> , 39-46 |
| 908 | (5 <i>S</i> ,8 <i>R</i> ,9 <i>S</i> ,10 <i>R</i> ,13 <i>S</i> )-10βH-13- <i>O</i> -α-L-arabinopyranosyl-17α,19β,20α-trimethyl-3,14-clerodadiene                 | H   |                                  |                                              |
| 909 | (5 <i>S</i> ,8 <i>R</i> ,9 <i>S</i> ,10 <i>R</i> ,13 <i>S</i> )-10βH-13- <i>O</i> -α-L-arabinopyranosyl-2β-hydroperoxyl-17α,19β,20α-trimethyl-3,14-clerodadiene | OOH |                                  |                                              |

**NARDOPHYLLUM Genus**

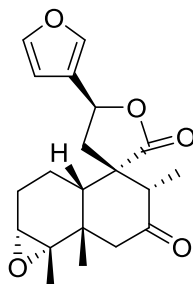

755

|     |   |                             |                                                     |
|-----|---|-----------------------------|-----------------------------------------------------|
| 755 | — | <i>Nardophyllum lanatum</i> | <i>Phytochemistry</i> , 1990, <b>29</b> , 1227-1230 |
|-----|---|-----------------------------|-----------------------------------------------------|

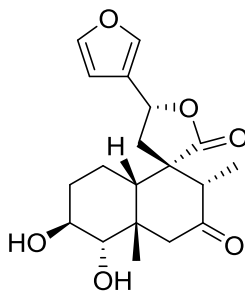

1061

|      |   |                             |                                                     |
|------|---|-----------------------------|-----------------------------------------------------|
| 1061 | — | <i>Nardophyllum lanatum</i> | <i>Phytochemistry</i> , 1990, <b>29</b> , 1227-1230 |
|------|---|-----------------------------|-----------------------------------------------------|



**NEPETA Genus**

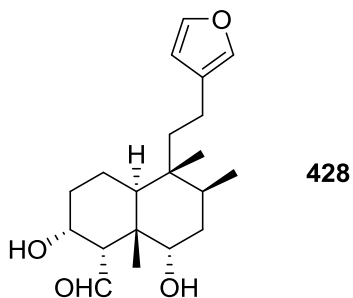

|            |             |                      |                                                       |
|------------|-------------|----------------------|-------------------------------------------------------|
| <b>428</b> | nepetalanal | <i>Nepeta juncea</i> | <i>Magn. Reson. Chem.</i> , 2009, <b>47</b> , 625-627 |
|------------|-------------|----------------------|-------------------------------------------------------|

**NUXIA Genus**

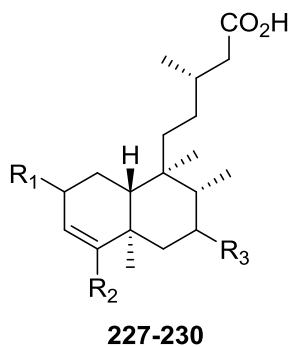

|            |                                                                           | R1 | R2                             | R3  |                             |                                                   |
|------------|---------------------------------------------------------------------------|----|--------------------------------|-----|-----------------------------|---------------------------------------------------|
| <b>227</b> | (13 <i>S</i> )- <i>ent</i> -7β-hydroxy-3-cleroden-15-oic acid             | H  | Me                             | αOH | <i>Nuxia sphaerocephala</i> | <i>Phytochemistry</i> , 2006, <b>67</b> , 444-451 |
| <b>228</b> | <i>ent</i> -7β-hydroxy-2-oxo-3-cleroden-15-oic acid                       | =O | Me                             | αOH |                             |                                                   |
| <b>229</b> | <i>ent</i> -2,7-dioxo-3-cleroden-15-oic acid                              | =O | Me                             | =O  |                             |                                                   |
| <b>230</b> | <i>ent</i> -18-( <i>E</i> )-caffeoyloxy-7β-hydroxy-3-cleroden-15-oic acid | H  | CH <sub>2</sub> Z <sub>4</sub> | αOH |                             |                                                   |

**OLEARIA Genus**

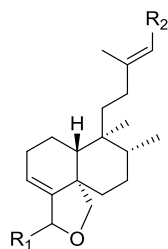

**136** R<sub>1</sub> = =O, R<sub>2</sub> = CH<sub>2</sub>OMal  
**137** R<sub>1</sub> = β-OMe, R<sub>2</sub> = CO<sub>2</sub>H  
**138** R<sub>1</sub> = α-OMe, R<sub>2</sub> = CO<sub>2</sub>H

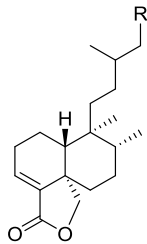

**139** R = CO<sub>2</sub>H  
**140** R = CH<sub>2</sub>OMal  
**145** R = CH<sub>2</sub>OH

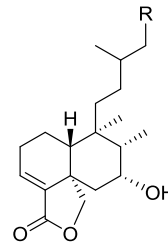

**141** R = CO<sub>2</sub>H  
**142** R = CH<sub>2</sub>OMal  
**146** R = CH<sub>2</sub>OH

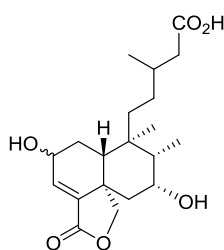

**143** C-2α  
**144** C-2β

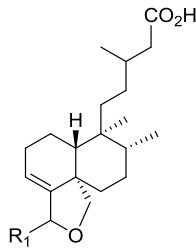

**147** R = β-OMe  
**148** R = α-OMe

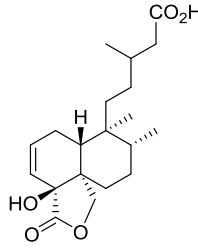

**149**

|            |                                                                              |                            |                                                     |
|------------|------------------------------------------------------------------------------|----------------------------|-----------------------------------------------------|
| <b>136</b> | 15-malonyloxy- <i>ent</i> -cleroda-3,13 <i>E</i> -dien-18,19-olide           | <i>Olearia teretifolia</i> | <i>Phytochemistry</i> , 1992, <b>31</b> , 1703-1711 |
| <b>137</b> | 18,19-epoxy-18β-methoxy- <i>ent</i> -cleroda-3,13 <i>E</i> -dien-15-oic acid |                            |                                                     |
| <b>138</b> | 18,19-epoxy-18α-methoxy- <i>ent</i> -cleroda-3,13 <i>E</i> -dien-15-oic acid |                            |                                                     |
| <b>139</b> | <i>ent</i> -clerod-3-en-15-oic acid-18,19-olide                              |                            |                                                     |
| <b>140</b> | 15-malonyloxy- <i>ent</i> -clerod-3-en-18,19-olide                           |                            |                                                     |
| <b>141</b> | 15-malonyloxy-7α-hydroxy- <i>ent</i> -clerod-3-en-18,19-olide                |                            |                                                     |
| <b>142</b> | 7α-hydroxy- <i>ent</i> -clerod-3-en-15-oic acid-18,19-olide                  |                            |                                                     |
| <b>143</b> | 2α-hydroxy- <i>ent</i> -cleroda-3-en-15-oic acid-18,19-olide                 |                            |                                                     |
| <b>144</b> | 2β-hydroxy- <i>ent</i> -clerod-3-en-15-oic acid-18,19-olide                  |                            |                                                     |
| <b>145</b> | 15-hydroxy- <i>ent</i> -clerod-3-en-18,19-olide                              |                            |                                                     |
| <b>146</b> | 7α,15-dihydroxy- <i>ent</i> -clerod-3-en-18,19-olide                         |                            |                                                     |
| <b>147</b> | 18,19-epoxy-18β-methoxy- <i>ent</i> -clerod-3-en-15-oic acid                 |                            |                                                     |
| <b>148</b> | 18,19-epoxy-18α-methoxy- <i>ent</i> -clerod-3-en-15-oic acid                 |                            |                                                     |
| <b>149</b> | 4β-hydroxy- <i>ent</i> -clerod-2-en-15-oic acid-18,19-olide                  |                            |                                                     |

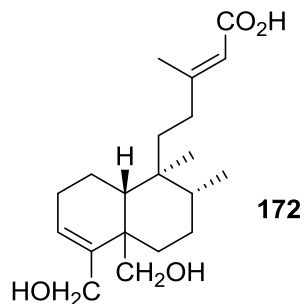

|            |                                                                      |                            |                                                     |
|------------|----------------------------------------------------------------------|----------------------------|-----------------------------------------------------|
| <b>172</b> | 18,19-dihydroxy- <i>ent</i> -cleroda-3,13 <i>E</i> -dien-15-oic acid | <i>Olearia teretifolia</i> | <i>Phytochemistry</i> , 1992, <b>31</b> , 1703-1711 |
|------------|----------------------------------------------------------------------|----------------------------|-----------------------------------------------------|

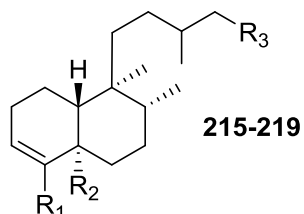

|            |                                                             | R1                 | R2                   | R3                 |                            |                                                     |
|------------|-------------------------------------------------------------|--------------------|----------------------|--------------------|----------------------------|-----------------------------------------------------|
| <b>215</b> | 19-hydroxykovoalic acid                                     | CO <sub>2</sub> H  | CH <sub>2</sub> OH   | CO <sub>2</sub> H  | <i>Olearia teretifolia</i> | <i>Phytochemistry</i> , 1992, <b>31</b> , 1703-1711 |
| <b>216</b> | 18-oxo-19-seneciyl-oxy- <i>ent</i> -clerod-3-en-15-oic acid | CHO                | CH <sub>2</sub> OSen | CO <sub>2</sub> H  |                            |                                                     |
| <b>217</b> | 18-oxo- <i>ent</i> -clerod-3-en-15,19-dioic acid            | CHO                | CO <sub>2</sub> H    | CO <sub>2</sub> H  |                            |                                                     |
| <b>218</b> | 15,19-dihydroxy- <i>ent</i> -clerod-3-en-18-oic acid        | CO <sub>2</sub> H  | CH <sub>2</sub> OH   | CH <sub>2</sub> OH |                            |                                                     |
| <b>219</b> | 15,18,19-trihydroxy- <i>ent</i> -clerod-3-ene               | CH <sub>2</sub> OH | CH <sub>2</sub> OH   | CH <sub>2</sub> OH |                            |                                                     |

**OTOSTEGIA Genus**

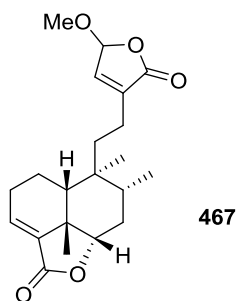

|            |               |                          |                                                       |
|------------|---------------|--------------------------|-------------------------------------------------------|
| <b>467</b> | limbatolide A | <i>Otostegia limbata</i> | <i>Chem. Pharm. Bull.</i> , 2005, <b>53</b> , 378-381 |
|------------|---------------|--------------------------|-------------------------------------------------------|

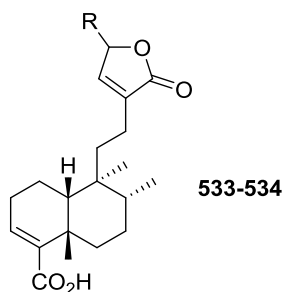

|            |               |     |                          |                                                       |
|------------|---------------|-----|--------------------------|-------------------------------------------------------|
| <b>533</b> | limbatolide B | OMe | <i>Otostegia limbata</i> | <i>Chem. Pharm. Bull.</i> , 2005, <b>53</b> , 378-381 |
| <b>534</b> | limbatolide C | H   |                          |                                                       |

**PENIANTHUS Genus**

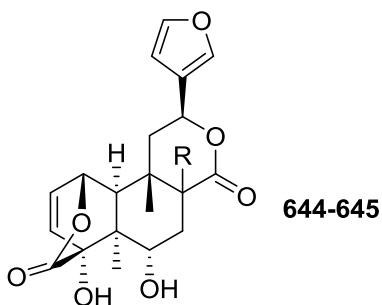

|            |                      |            |                           |                                                     |
|------------|----------------------|------------|---------------------------|-----------------------------------------------------|
| <b>645</b> | 6-hydroxycolumbin    | $\beta$ H  | <i>Penianthus zenkeri</i> | <i>Phytochemistry</i> , 1991, <b>30</b> , 1957-1962 |
| <b>646</b> | 6-hydroxyisocolumbin | $\alpha$ H |                           |                                                     |

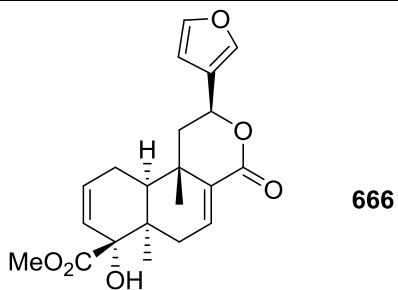

|            |                              |                           |                                                     |
|------------|------------------------------|---------------------------|-----------------------------------------------------|
| <b>666</b> | penianthic acid methyl ester | <i>Penianthus zenkeri</i> | <i>Phytochemistry</i> , 1991, <b>30</b> , 1957-1962 |
|------------|------------------------------|---------------------------|-----------------------------------------------------|

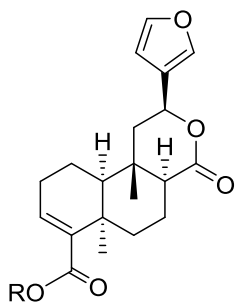

958-959

|     |                            |                |                           |                                                        |
|-----|----------------------------|----------------|---------------------------|--------------------------------------------------------|
| 958 | floribundic acid glucoside | Glc            | <i>Penianthus zenkeri</i> | <i>Phytochemistry</i> , 1991,<br><b>30</b> , 1957-1962 |
| 959 | zenkerin                   | -Xyl-(1→6)-Glc |                           |                                                        |

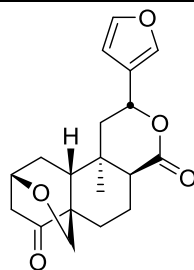

1060

|      |              |                           |                                                   |
|------|--------------|---------------------------|---------------------------------------------------|
| 1060 | peniankerine | <i>Penianthus zenkeri</i> | <i>Phytochemistry</i> , 1997, <b>46</b> , 165-167 |
|------|--------------|---------------------------|---------------------------------------------------|

**PHLOMIS Genus**

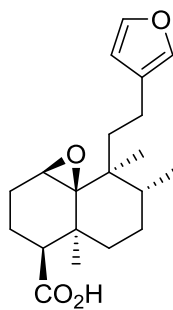

376

|     |               |                          |                                                      |
|-----|---------------|--------------------------|------------------------------------------------------|
| 376 | phlomeic acid | <i>Phlomis bracteosa</i> | <i>Nat. Prod. Commun.</i> , 2011, <b>6</b> , 171-173 |
|-----|---------------|--------------------------|------------------------------------------------------|

**PLATYCHAETE Genus**

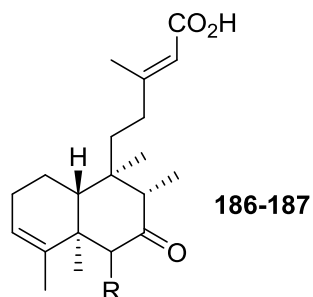

|            |                                                               |             |                            |                                                   |
|------------|---------------------------------------------------------------|-------------|----------------------------|---------------------------------------------------|
| <b>186</b> | 7-oxo-ent-clerodan-3,13E-dien-15-oic acid                     | H           | <i>Platychaete aucheri</i> | <i>Phytochemistry</i> , 1990, <b>29</b> , 985-987 |
| <b>187</b> | 6 $\alpha$ -hydroxy-7-oxo-ent-clerodan-3,13E-dien-15-oic acid | $\alpha$ OH |                            |                                                   |

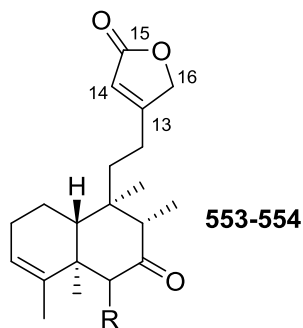

|            |                                                     |             |                            |                                                   |
|------------|-----------------------------------------------------|-------------|----------------------------|---------------------------------------------------|
| <b>553</b> | 7-oxo-ent-clerodan-3,13-dien-15,16-olide            | H           | <i>Platychaete aucheri</i> | <i>Phytochemistry</i> , 1990, <b>29</b> , 985-987 |
| <b>554</b> | 6-hydroxy-7-oxo-ent-clerodane-3,13-dien-15,16-olide | $\alpha$ OH |                            |                                                   |

**POLYALTHIA Genus**

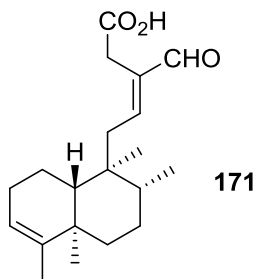

|            |                                    |                           |                                                   |
|------------|------------------------------------|---------------------------|---------------------------------------------------|
| <b>171</b> | 3,12E-kolavadien-15-oic acid-16-al | <i>Polyalthia viridis</i> | <i>Phytochemistry</i> , 1993, <b>34</b> , 457-460 |
|------------|------------------------------------|---------------------------|---------------------------------------------------|

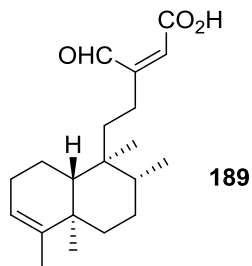

|            |                      |                              |                                                |
|------------|----------------------|------------------------------|------------------------------------------------|
| <b>189</b> | polyalthialdoic acid | <i>Polyalthia longifolia</i> | <i>Planta Med.</i> , 1991, <b>57</b> , 380-383 |
|------------|----------------------|------------------------------|------------------------------------------------|

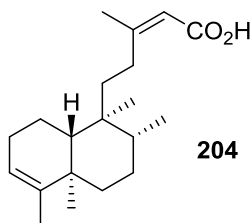

|            |                                                     |                              |                                                |
|------------|-----------------------------------------------------|------------------------------|------------------------------------------------|
| <b>204</b> | 16-oxo-cleroda-3,13(14) <i>E</i> -diene-15-oic acid | <i>Polyalthia longifolia</i> | <i>Fitoterapia</i> , 2005, <b>76</b> , 336-339 |
|------------|-----------------------------------------------------|------------------------------|------------------------------------------------|

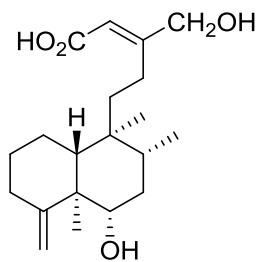

|            |                                                           |                              |                                                    |
|------------|-----------------------------------------------------------|------------------------------|----------------------------------------------------|
| <b>281</b> | 6 $\alpha$ ,16-dihydroxycleroda-4(18),13-dien-15-oic acid | <i>Polyalthia longifolia</i> | <i>J. Nat. Prod.</i> , 2009, <b>72</b> , 1960-1963 |
|------------|-----------------------------------------------------------|------------------------------|----------------------------------------------------|

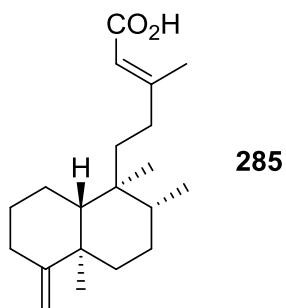

|            |                                                 |                              |                                                   |
|------------|-------------------------------------------------|------------------------------|---------------------------------------------------|
| <b>285</b> | cleroda-4(18),13(14) <i>E</i> -dien-15-oic acid | <i>Polyalthia cheliensis</i> | <i>Phytochemistry</i> , 1995, <b>39</b> , 447-448 |
|------------|-------------------------------------------------|------------------------------|---------------------------------------------------|

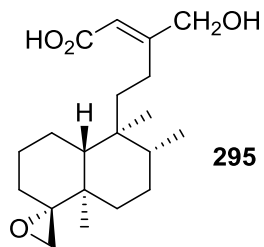

|            |                                                                       |                              |                                                    |
|------------|-----------------------------------------------------------------------|------------------------------|----------------------------------------------------|
| <b>295</b> | 4 $\alpha$ ,18 $\beta$ -epoxy-16-hydroxycycloclerod-13-en-15-oic acid | <i>Polyalthia longifolia</i> | <i>J. Nat. Prod.</i> , 2009, <b>72</b> , 1960-1963 |
|------------|-----------------------------------------------------------------------|------------------------------|----------------------------------------------------|

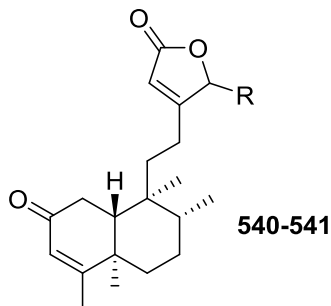

|            |                                                            |             |                           |                                                   |
|------------|------------------------------------------------------------|-------------|---------------------------|---------------------------------------------------|
| <b>540</b> | 16( <i>R</i> )-3,13 <i>Z</i> -kolavadien-16,15-olide-2-one | $\alpha$ OH | <i>Polyalthia viridis</i> | <i>Phytochemistry</i> , 1990, <b>29</b> , 653-655 |
| <b>541</b> | 16( <i>S</i> )-3,13 <i>Z</i> -kolavadien-16,15-olide-2-one | $\beta$ OH  |                           |                                                   |

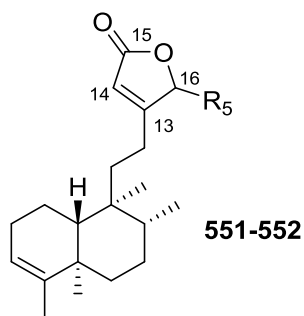

|            |                                                                  |              |                              |                                                  |
|------------|------------------------------------------------------------------|--------------|------------------------------|--------------------------------------------------|
| <b>551</b> | 16 $\alpha$ -hydroxy-cleroda-3,13 <i>Z</i> -diene-15,16-olide    | $\alpha$ OH  | <i>Polyalthia longifolia</i> | <i>Fitoterapia</i> , 2005, <b>76</b> , 336-339   |
| <b>552</b> | 16 $\alpha$ -methoxycyclocleroda-3,13 <i>Z</i> -dien-16,15-olide | $\alpha$ OMe |                              | <i>J. Nat. Prod.</i> , 1992, <b>55</b> , 256-258 |

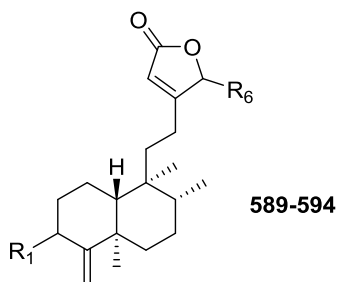

|            |                                                                                            |             |             |                              |                                                      |
|------------|--------------------------------------------------------------------------------------------|-------------|-------------|------------------------------|------------------------------------------------------|
|            |                                                                                            | R1          | R2          |                              |                                                      |
| <b>589</b> | (-)-3 $\alpha$ ,16 $\alpha$ -dihydroxycyclocleroda-4(18),13(14) <i>Z</i> -dien-15,16-olide | $\alpha$ OH | $\alpha$ OH | <i>Polyalthia longifolia</i> | <i>Nat. Prod. Res.</i> , 2010, <b>24</b> , 1687-1694 |



|     |                                                                                  |            |                          |                                                  |                                                   |
|-----|----------------------------------------------------------------------------------|------------|--------------------------|--------------------------------------------------|---------------------------------------------------|
| 590 | 3 $\beta$ ,16 $\alpha$ -dihydroxycleroda-4(18),13(14) <i>Z</i> -dien-15,16-olide | $\beta$ OH | $\alpha$ OH              | <i>Polyalthia barnesii</i>                       | <i>Phytochemistry</i> 1994, <b>37</b> , 1659-1662 |
| 591 | cleroda-4(18),13-dien-16,15-olide                                                | H          | H                        | <i>Polyalthia longifolia</i>                     | <i>Phytochemistry</i> 1995, <b>38</b> , 189-194   |
| 592 | 16-hydroxycleroda-4(18),13-dien-16,15-olide                                      | H          | OH ( $\alpha/\beta$ 1:1) |                                                  |                                                   |
| 593 | —                                                                                | H          | $\beta$ OH               |                                                  | <i>Pharmazie</i> , 1995, <b>50</b> , 227-228      |
| 594 | 16( <i>R</i> & <i>S</i> )-methoxycleroda-4(18),13-dien-15,16-olide               | H          | OMe                      | <i>Polyalthia longifolia</i> var. <i>pendula</i> | <i>Molecules</i> , 2014, <b>19</b> , 2049-2060    |

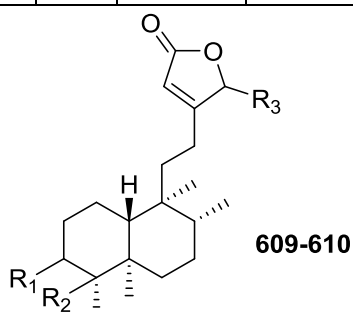

|     |                                                                          | R1 | R2         | R3          |                                                  |                                                   |
|-----|--------------------------------------------------------------------------|----|------------|-------------|--------------------------------------------------|---------------------------------------------------|
| 609 | 4 $\beta$ ,16 $\alpha$ -dihydroxycleroda-13(14) <i>Z</i> -en-15,16-olide | H  | $\beta$ OH | $\alpha$ OH | <i>Polyalthia barnesii</i>                       | <i>Phytochemistry</i> 1994, <b>37</b> , 1659-1662 |
| 610 | 16-hydroxycleroda-13-ene-15,16-olide-3-one                               | =O | H          | OH          | <i>Polyalthia longifolia</i> var. <i>pendula</i> | <i>Planta Med.</i> , 2006, <b>72</b> , 1344-1347  |

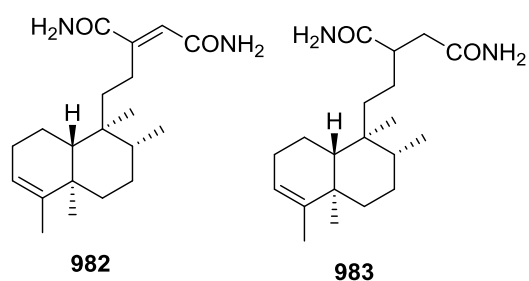

|     |                                                |                              |                                                   |
|-----|------------------------------------------------|------------------------------|---------------------------------------------------|
| 982 | cleroda-3,13(14) <i>E</i> -diene-15,16-diamide | <i>Polyalthia longifolia</i> | <i>Phytochem. Lett.</i> , 2015, <b>11</b> , 28-31 |
| 983 | cleroda-3-ene-15,16-diamide                    |                              |                                                   |

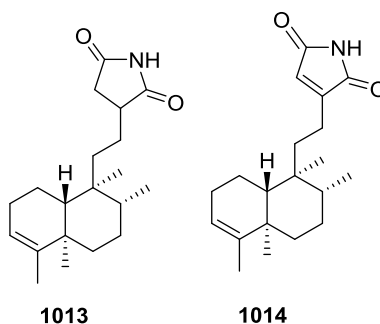

|      |                                      |                              |                                                   |
|------|--------------------------------------|------------------------------|---------------------------------------------------|
| 1013 | cleroda-3-ene yrrolidine-15,16-dione | <i>Polyalthia longifolia</i> | <i>Phytochem. Lett.</i> , 2015, <b>11</b> , 28-31 |
| 1014 | cleroda-3-ene yrrole-15,16-dione     |                              |                                                   |

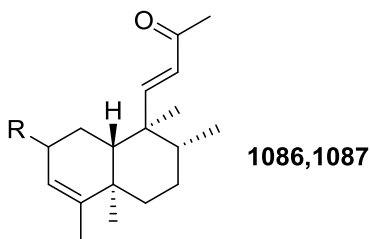

|             |                                                     |    |                            |                                                        |
|-------------|-----------------------------------------------------|----|----------------------------|--------------------------------------------------------|
| <b>1086</b> | 2-oxo-14,15-bisnor-3,11 <i>E</i> -kolavadien-13-one | =O | <i>Polyalthia simiarum</i> | <i>Nat. Prod. Commun.</i> , 2010, <b>5</b> , 1543-1546 |
| <b>1087</b> | 14,15-bisnor-3,11 <i>E</i> -kolavadien-13-one       | H  | <i>Polyalthia viridis</i>  | <i>Phytochemistry</i> , 1990, <b>29</b> , 653-655      |

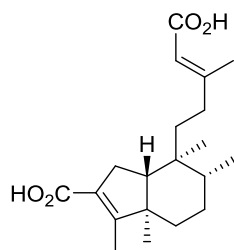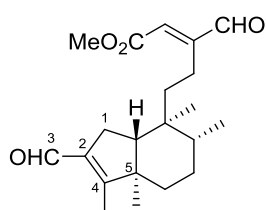

|             |                                                                  |                                                  |                                                |
|-------------|------------------------------------------------------------------|--------------------------------------------------|------------------------------------------------|
| <b>1148</b> | (4→2)-abeo-cleroda-2,13 <i>E</i> -dien-2,14-dioic acid           | <i>Polyalthia longifolia</i> var. <i>pendula</i> | <i>Molecules</i> , 2014, <b>19</b> , 2049-2060 |
| <b>1149</b> | (4→2)-abeo-2,13-diformyl-cleroda-2,13 <i>E</i> -dien-14-oic acid |                                                  |                                                |

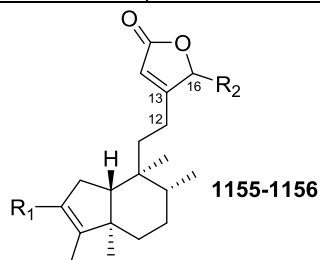

|             |                                                               |                   |     |                                                  |                                                    |
|-------------|---------------------------------------------------------------|-------------------|-----|--------------------------------------------------|----------------------------------------------------|
|             |                                                               | R1                | R2  |                                                  |                                                    |
| <b>1155</b> | (4→2)-abeo-16(R&S)-2,13 <i>Z</i> -kolavadien-16,15-olide-3-al | CHO               | βOH | <i>Polyalthia viridis</i>                        | <i>Phytochemistry</i> , 1990, <b>29</b> , 653-655  |
| <b>1156</b> | polylongifoliaic A                                            | CO <sub>2</sub> H | OH  | <i>Polyalthia longifolia</i> var. <i>pendula</i> | <i>RSC Advances</i> , 2014, <b>4</b> , 23707-23712 |

**PORTULACA Genus**

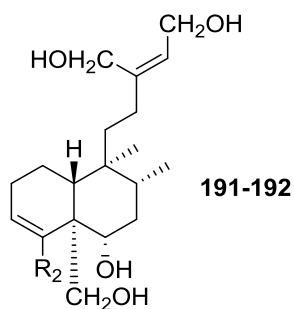

|            |             |                    |                         |                                                     |
|------------|-------------|--------------------|-------------------------|-----------------------------------------------------|
| <b>191</b> | pilosanol A | Me                 | <i>Portulaca pilosa</i> | <i>Phytochemistry</i> , 1991, <b>30</b> , 4075-4077 |
| <b>192</b> | pilosanol B | CH <sub>2</sub> OH |                         |                                                     |

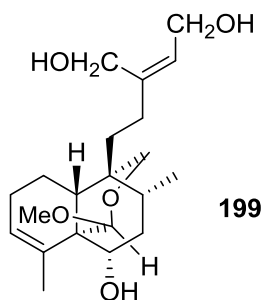

|            |                  |                              |                                                  |
|------------|------------------|------------------------------|--------------------------------------------------|
| <b>199</b> | portulene acetal | <i>Portulaca grandiflora</i> | <i>J. Nat. Prod.</i> , 1997, <b>60</b> , 912-914 |
|------------|------------------|------------------------------|--------------------------------------------------|

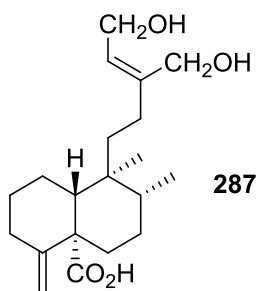

|            |            |                              |                                                  |
|------------|------------|------------------------------|--------------------------------------------------|
| <b>287</b> | porwenin A | <i>Portulaca okinawensis</i> | <i>J. Nat. Prod.</i> , 2001, <b>64</b> , 804-805 |
|------------|------------|------------------------------|--------------------------------------------------|

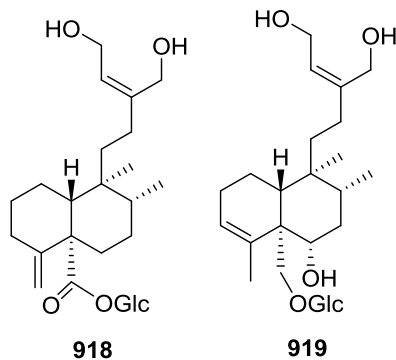

|            |             |                              |                                                     |
|------------|-------------|------------------------------|-----------------------------------------------------|
| <b>918</b> | porwenin B  | <i>Portulaca okinawensis</i> | <i>J. Nat. Prod.</i> , 2001, <b>64</b> , 804-805    |
| <b>919</b> | pilosanol C | <i>Portulaca pilosa</i>      | <i>Phytochemistry</i> , 1991, <b>30</b> , 4075-4077 |

**PREMNA Genus**

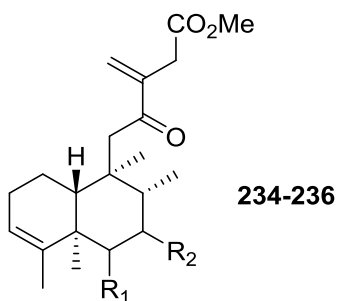

|            |            | R1                             | R2                            |                         |                                                     |
|------------|------------|--------------------------------|-------------------------------|-------------------------|-----------------------------------------------------|
| <b>234</b> | premnone A | $\alpha$ OCin ( <i>trans</i> ) | $\beta$ OH                    | <i>Premna tomentosa</i> | <i>Phytochemistry</i> , 2006, <b>67</b> , 1243–1248 |
| <b>235</b> | premnone B | $\alpha$ OCin ( <i>cis</i> )   | $\beta$ OH                    |                         |                                                     |
| <b>236</b> | premnone C | $\alpha$ OH                    | $\beta$ OCin ( <i>trans</i> ) |                         |                                                     |

**PTYCHOPETALUM Genus**

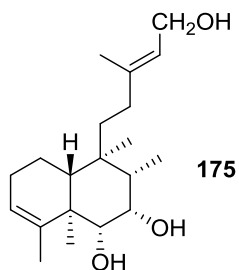

|            |                                            |                                |                                                      |
|------------|--------------------------------------------|--------------------------------|------------------------------------------------------|
| <b>175</b> | 6 $\alpha$ ,7 $\alpha$ -dihydroxykolavenol | <i>Ptychopetalum olacoides</i> | <i>Nat. Prod. Commun.</i> , 2011, <b>6</b> , 327-332 |
|------------|--------------------------------------------|--------------------------------|------------------------------------------------------|

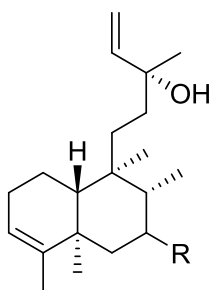

237-238

|     |                               |             |                                |                                                      |
|-----|-------------------------------|-------------|--------------------------------|------------------------------------------------------|
| 237 | 7-oxo-kolavelool              | =O          | <i>Ptychopetalum olacoides</i> | <i>Nat. Prod. Commun.</i> , 2011, <b>6</b> , 327-332 |
| 238 | 7 $\alpha$ -hydroxykolavelool | $\alpha$ OH |                                |                                                      |

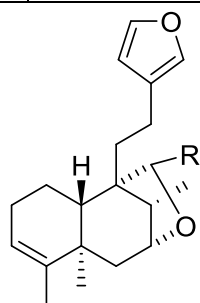

327-329

|     |                             |             |                                |                                                    |
|-----|-----------------------------|-------------|--------------------------------|----------------------------------------------------|
| 327 | ptychonolide                | =O          | <i>Ptychopetalum olacoides</i> | <i>J. Nat. Prod.</i> , 2008, <b>71</b> , 1760-1763 |
| 328 | 20-O-methylptychonal acetal | $\beta$ OMe |                                |                                                    |
| 329 | ptychonal hemiacetal        | $\beta$ OH  |                                |                                                    |

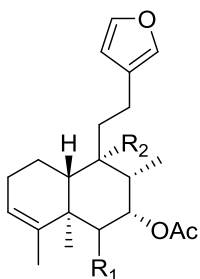

380, 382-383

|     |                                           | R1          | R2                 |                                |                                                             |
|-----|-------------------------------------------|-------------|--------------------|--------------------------------|-------------------------------------------------------------|
| 380 | ptychonal                                 | H           | CHO                | <i>Ptychopetalum olacoides</i> | <i>J. Nat. Prod.</i> , 2008, <b>71</b> , 1760-1763          |
| 382 | 6 $\alpha$ ,7 $\alpha$ -dihydroxyannonene | $\alpha$ OH | Me                 | <i>Ptychopetalum olacoides</i> | <i>Bioorg. Med. Chem. Lett.</i> , 2009, <b>19</b> , 882-886 |
| 383 | 7 $\alpha$ ,20-dihydroxyannonene          | H           | CH <sub>2</sub> OH |                                |                                                             |

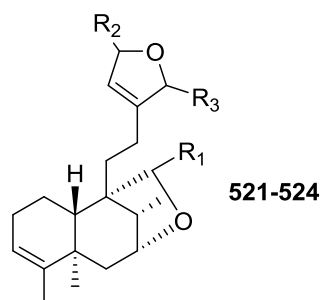

|            |                | R1  | R2  | R3 |                                |                                                      |
|------------|----------------|-----|-----|----|--------------------------------|------------------------------------------------------|
| <b>521</b> | ptycholide I   | =O  | OMe | =O | <i>Ptychopetalum olacoides</i> | <i>Nat. Prod. Commun.</i> , 2011, <b>6</b> , 327-332 |
| <b>522</b> | ptycholide II  | OMe | OMe | =O |                                |                                                      |
| <b>523</b> | ptycholide III | OMe | H   | =O |                                |                                                      |
| <b>524</b> | ptycholide IV  | OMe | =O  | OH |                                |                                                      |

**PULICARIA Genus**

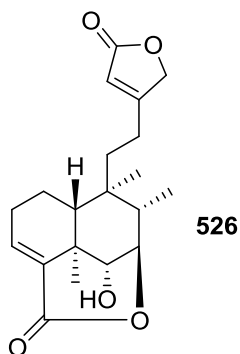

|            |                                                          |                            |                                                        |
|------------|----------------------------------------------------------|----------------------------|--------------------------------------------------------|
| <b>526</b> | 6 $\alpha$ -hydroxycleroda-3,13-dien-15(16),4(7)-diolide | <i>Pulicaria wightiana</i> | <i>Helv. Chim. Acta.</i> , 2008, <b>91</b> , 2081-2088 |
|------------|----------------------------------------------------------|----------------------------|--------------------------------------------------------|

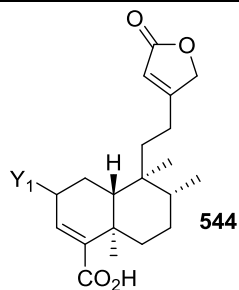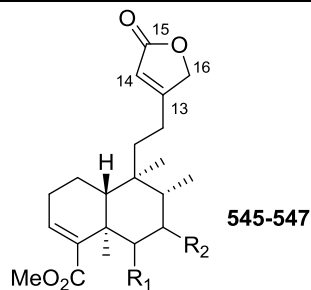

|            |                                                                       | R1 | R2 |                            |                                                        |
|------------|-----------------------------------------------------------------------|----|----|----------------------------|--------------------------------------------------------|
| <b>544</b> | 2 $\beta$ -(2-methylbutanoyl)cleroda-3,13-dien-15,16-olid-18-oic acid | —  | —  | <i>Pulicaria wightiana</i> | <i>Helv. Chim. Acta.</i> , 2008, <b>91</b> , 2081-2088 |
| <b>545</b> | methyl 6-oxocleroda-3,13-dien-15,16-olid-18-                          | =O | H  |                            |                                                        |

|     |                                                                             |             |             |  |  |
|-----|-----------------------------------------------------------------------------|-------------|-------------|--|--|
|     | oate                                                                        |             |             |  |  |
| 546 | methyl 6 $\alpha$ -hydroxycyclo-3,13-dien-15,16-olide-18-oate               | $\alpha$ OH | H           |  |  |
| 547 | methyl 6 $\alpha$ ,7 $\alpha$ -dihydroxycyclo-3,13-dien-15,16-olide-18-oate | $\alpha$ OH | $\alpha$ OH |  |  |

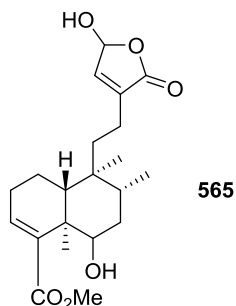

|     |                                                          |                            |                                                        |
|-----|----------------------------------------------------------|----------------------------|--------------------------------------------------------|
| 565 | methyl 6,15-dihydroxycyclo-3,13-dien-16,15-olide-18-oate | <i>Pulicaria wightiana</i> | <i>Helv. Chim. Acta.</i> , 2008, <b>91</b> , 2081-2088 |
|-----|----------------------------------------------------------|----------------------------|--------------------------------------------------------|

**RASPAILIA Genus**

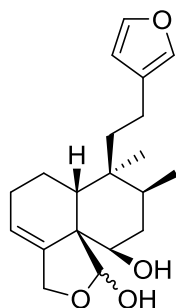

|     |           |                          |                                                   |
|-----|-----------|--------------------------|---------------------------------------------------|
| 301 | raspailol | <i>Raspailia</i> species | <i>Phytochemistry</i> , 1995, <b>39</b> , 443-445 |
|-----|-----------|--------------------------|---------------------------------------------------|

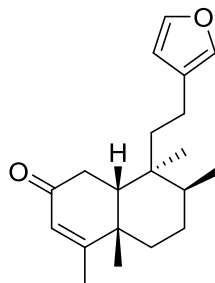

|     |              |                          |                                                   |
|-----|--------------|--------------------------|---------------------------------------------------|
| 397 | raspailenone | <i>Raspailia</i> species | <i>Phytochemistry</i> , 1995, <b>39</b> , 443-445 |
|-----|--------------|--------------------------|---------------------------------------------------|

**SALVIA Genus**

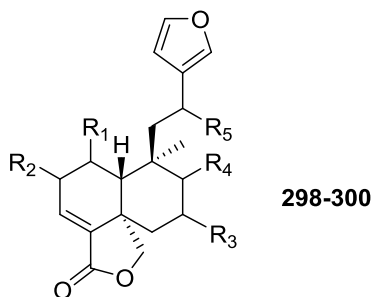

|            |                                                                                                                                                                         | R1          | R2         | R3           | R4          | R5 |                        |                                                    |
|------------|-------------------------------------------------------------------------------------------------------------------------------------------------------------------------|-------------|------------|--------------|-------------|----|------------------------|----------------------------------------------------|
| <b>298</b> | 2 $\alpha$ -hydroxy-7 $\alpha$ -acetoxy-12-oxo-15:16-epoxy-neoclerodan-3,13(16),14-trien-18:19-olide                                                                    | H           | OH         | $\alpha$ OAc | $\alpha$ Me | =O | <i>Salvia urolepis</i> | <i>Phytochemistry</i> , 1995, <b>38</b> , 171-174  |
| <b>299</b> | —                                                                                                                                                                       | H           | H          | $\beta$ OAc  | $\alpha$ Me | OH | <i>Salvia miniata</i>  | <i>Phytochemistry</i> , 2011, <b>72</b> , 265-275  |
| <b>300</b> | <i>ent</i> -(5 <i>R</i> ,9 <i>S</i> ,10 <i>S</i> )-7 <i>S</i> -acetoxy-15,16-epoxy-1 <i>S</i> ,2 <i>S</i> ,12 $\zeta$ -trihydroxy-cleroda-3,13(16),14-trien-18,19-olide | $\alpha$ OH | $\beta$ OH | $\alpha$ OAc | $\beta$ Me  | OH | <i>Salvia haenke</i>   | <i>Tetrahedron</i> , 1997, <b>53</b> , 14719-14728 |

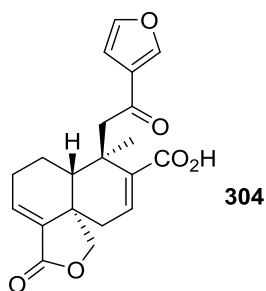

|            |           |                       |                                                         |
|------------|-----------|-----------------------|---------------------------------------------------------|
| <b>304</b> | dugesin G | <i>Salvia dugesii</i> | <i>Nat. Prod. Bioprospect.</i> , 2011, <b>1</b> , 81-86 |
|------------|-----------|-----------------------|---------------------------------------------------------|

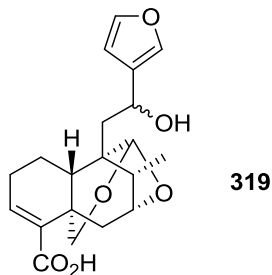

|            |   |                       |                                                   |
|------------|---|-----------------------|---------------------------------------------------|
| <b>319</b> | — | <i>Salvia miniata</i> | <i>Phytochemistry</i> , 2011, <b>72</b> , 265-275 |
|------------|---|-----------------------|---------------------------------------------------|



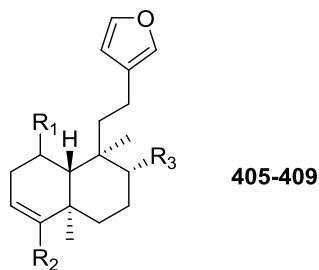

|            |                      | R1          | R2                 | R3                  |                         |                                                         |
|------------|----------------------|-------------|--------------------|---------------------|-------------------------|---------------------------------------------------------|
| <b>405</b> | divinatorin A        | $\alpha$ OH | CO <sub>2</sub> H  | Me                  | <i>Salvia divinorum</i> | <i>J. Nat. Prod.</i> , 2003, <b>66</b> , 1242-1244      |
| <b>406</b> | divinatorin B        | $\alpha$ OH | CO <sub>2</sub> Me | CH <sub>2</sub> OH  |                         |                                                         |
| <b>407</b> | divinatorin C        | H           | CO <sub>2</sub> H  | CH <sub>2</sub> OAc |                         |                                                         |
| <b>408</b> | (-)-hardwickiic acid | H           | CO <sub>2</sub> H  | Me                  |                         |                                                         |
| <b>409</b> | divinatorin D        | $\alpha$ OH | CO <sub>2</sub> Me | CH <sub>2</sub> OAc | <i>Salvia divinorum</i> | <i>Bioorg. Med. Chem.</i> , 2005, <b>13</b> , 5635-5639 |
| <b>410</b> | divinatorin E        | $\alpha$ OH | CO <sub>2</sub> Me | CHO                 |                         |                                                         |

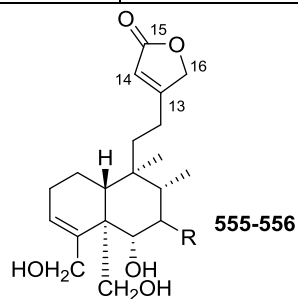

|            |                            |            |                         |                                                     |
|------------|----------------------------|------------|-------------------------|-----------------------------------------------------|
| <b>555</b> | thymonin                   | H          | <i>Salvia thymoides</i> | <i>Phytochemistry</i> , 1997, <b>46</b> , 1249-1254 |
| <b>556</b> | 7 $\beta$ -hydroxythymonin | $\beta$ OH |                         |                                                     |

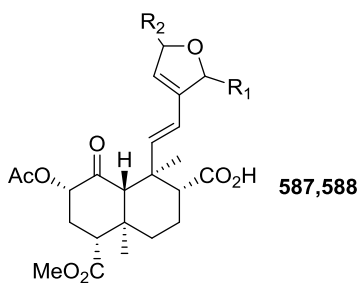

|            |              |    |    |                         |                                                    |
|------------|--------------|----|----|-------------------------|----------------------------------------------------|
| <b>587</b> | salvidivin C | OH | =O | <i>Salvia divinorum</i> | <i>J. Nat. Prod.</i> , 2006, <b>69</b> , 1782-1786 |
| <b>588</b> | salvidivin D | =O | OH |                         |                                                    |

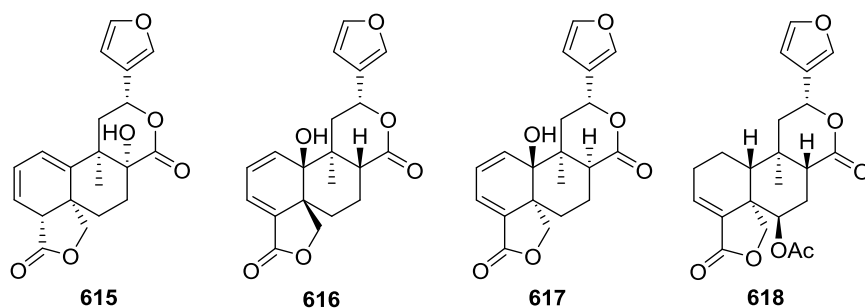

|            |                     |                           |                                                         |
|------------|---------------------|---------------------------|---------------------------------------------------------|
| <b>615</b> | tehuanin D          | <i>Salvia herbacea</i>    | <i>J. Nat. Prod.</i> , 2012, <b>75</b> , 951-958        |
| <b>616</b> | salvimicrophyllin C | <i>Salvia microphylla</i> | <i>J. Nat. Prod.</i> , 2014, <b>77</b> , 1088-1092      |
| <b>617</b> | salvimicrophyllin D |                           |                                                         |
| <b>618</b> | dugesin E           | <i>Salvia dugesii</i>     | <i>Nat. Prod. Bioprospect.</i> , 2011, <b>1</b> , 81-86 |

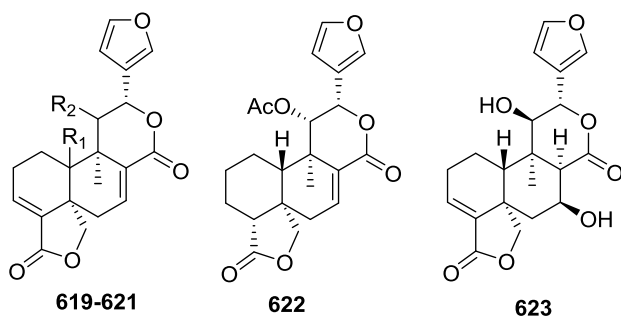

|            |                                                                                                                                 |             |             |                       |                                                    |
|------------|---------------------------------------------------------------------------------------------------------------------------------|-------------|-------------|-----------------------|----------------------------------------------------|
| <b>619</b> | <i>ent</i> -(5 <i>R</i> ,9 <i>R</i> )-15,16-epoxy-10 <i>S</i> -hydroxy-cleroda-3,13(16),14-triene-17,12 <i>S</i> ;18,19-diolide | $\alpha$ OH | H           | <i>Salvia haenkei</i> | <i>Tetrahedron</i> , 1997, <b>53</b> , 14719-14728 |
| <b>620</b> | —                                                                                                                               | $\beta$ H   | $\alpha$ OH | <i>Salvia miniata</i> | <i>Phytochemistry</i> , 2011, <b>72</b> , 265-275  |
| <b>621</b> | —                                                                                                                               | $\beta$ OH  | H           |                       |                                                    |
| <b>622</b> | —                                                                                                                               | —           | —           |                       |                                                    |
| <b>623</b> | —                                                                                                                               | —           | —           |                       |                                                    |

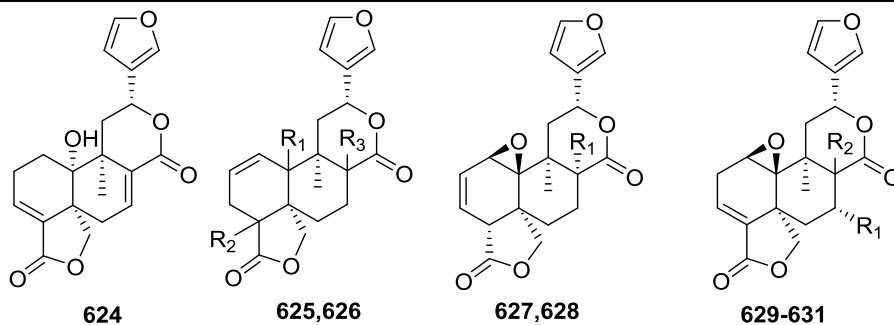

|            |                                                                                                                                    |            |            |             |                         |                                                    |
|------------|------------------------------------------------------------------------------------------------------------------------------------|------------|------------|-------------|-------------------------|----------------------------------------------------|
| <b>624</b> | <i>ent</i> -(5 <i>R</i> ,9 <i>R</i> )-15,16-epoxy-10 <i>S</i> -hydroxycleroda-3,7,13(16),14-tetraene-17,12 <i>S</i> ,18,19-diolide | —          | —          | —           | <i>Salvia haenkei</i>   | <i>Tetrahedron</i> , 1997, <b>53</b> , 14719-14728 |
| <b>625</b> | <i>ent</i> -(4 <i>S</i> ,5 <i>R</i> ,9 <i>S</i> ,10 <i>R</i> )-15,16-epoxycleroda-1,13(16),14-trien-17,12 <i>S</i> ;18,19-diolide  | $\alpha$ H | $\alpha$ H | $\alpha$ H  | <i>Salvia haenkei</i>   | <i>Tetrahedron</i> , 1997, <b>53</b> , 14719-14728 |
| <b>626</b> | infuscatin                                                                                                                         | $\beta$ OH | $\beta$ OH | $\alpha$ OH | <i>Salvia infuscata</i> | <i>Phytochem. Anal.</i> , 1994, <b>5</b> , 302-304 |
| <b>627</b> | tehuanin E                                                                                                                         | OH         | —          | —           | <i>Salvia</i>           | <i>J. Nat. Prod.</i> , 2012,                       |

|            |                                       |    |             |   |                 |                     |
|------------|---------------------------------------|----|-------------|---|-----------------|---------------------|
| <b>628</b> | 1 $\beta$ ,10 $\beta$ -epoxysalviarin | H  | —           | — | <i>herbacea</i> | <b>75</b> , 951-958 |
| <b>629</b> | tehuanin F                            | OH | $\beta$ H   | — |                 |                     |
| <b>630</b> | tehuanin G                            | H  | $\alpha$ OH | — |                 |                     |
| <b>631</b> | tehuanin H                            | H  | H           | — |                 |                     |

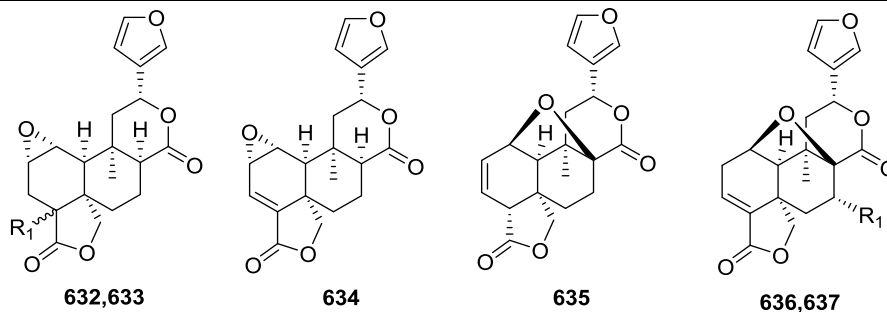

|            |                                                                   |            |                           |                                                     |
|------------|-------------------------------------------------------------------|------------|---------------------------|-----------------------------------------------------|
| <b>632</b> | 1 $\alpha$ ,2 $\alpha$ -epoxy-3,4 $\alpha$ -dihydrolinearolactone | $\alpha$ H | <i>Salvia reptans</i>     | <i>Phytochemistry</i> , 1991, <b>30</b> , 2335-2338 |
| <b>633</b> | polystachyne D                                                    | $\beta$ H  | <i>Salvia polystachya</i> | <i>Phytochemistry</i> , 2000, <b>53</b> , 103-109   |
| <b>634</b> | polystachyne E                                                    | —          |                           |                                                     |
| <b>635</b> | tehuanin A                                                        | —          | <i>Salvia herbacea</i>    | <i>J. Nat. Prod.</i> , 2012, <b>75</b> , 951-958    |
| <b>636</b> | tehuanin B                                                        | H          |                           |                                                     |
| <b>637</b> | tehuanin C                                                        | OH         |                           |                                                     |

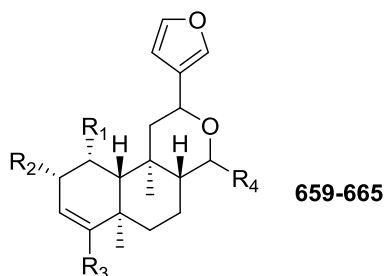

|            |              |     |     |                    |                        |                         |                                                    |
|------------|--------------|-----|-----|--------------------|------------------------|-------------------------|----------------------------------------------------|
| <b>659</b> | salvinorin C | OAc | OAc | CO <sub>2</sub> Me | =O                     | <i>Salvia divinorum</i> | <i>Org. Lett.</i> , 2001, <b>3</b> , 3935-3937     |
| <b>660</b> | salvinorin D | OAc | OH  | CO <sub>2</sub> Me | =O                     |                         | <i>J. Nat. Prod.</i> , 2003, <b>66</b> , 703-705   |
| <b>661</b> | salvinorin E | OH  | OAc | CO <sub>2</sub> Me | =O                     |                         | <i>J. Nat. Prod.</i> , 2006, <b>69</b> , 1782-1786 |
| <b>662</b> | salvinorin F | OH  | H   | CO <sub>2</sub> Me | =O                     |                         |                                                    |
| <b>663</b> | salvinorin H | OH  | OH  | CO <sub>2</sub> Me | =O                     |                         | <i>J. Nat. Prod.</i> , 2009, <b>72</b> , 1361-1363 |
| <b>664</b> | salvinorin I | OH  | OH  | CO <sub>2</sub> Me | $\beta$ OH             |                         |                                                    |
| <b>665</b> | salvinorin J | OH  | OAc | CO <sub>2</sub> Me | $\alpha$ , $\beta$ -OH |                         |                                                    |

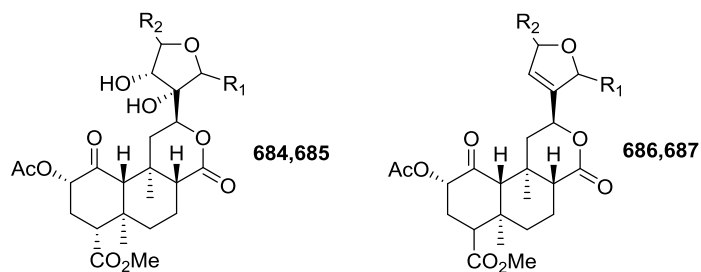

|            |             |              |              |                         |                                                |
|------------|-------------|--------------|--------------|-------------------------|------------------------------------------------|
| <b>684</b> | salvincin A | $\beta$ OMe  | $\beta$ OMe  | <i>Salvia divinorum</i> | <i>Org. Lett.</i> , 2005, <b>7</b> , 3017-3020 |
| <b>685</b> | salvincin B | $\alpha$ OMe | $\alpha$ OMe |                         |                                                |

|            |              |    |    |  |                                                    |
|------------|--------------|----|----|--|----------------------------------------------------|
| <b>686</b> | salvidivin A | =O | OH |  | <i>J. Nat. Prod.</i> , 2006, <b>69</b> , 1782-1786 |
| <b>687</b> | salvidivin B | OH | =O |  |                                                    |

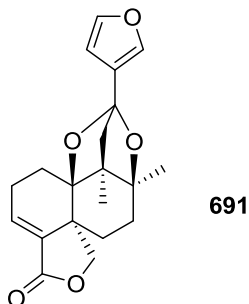

|            |                 |                       |                                                   |  |  |
|------------|-----------------|-----------------------|---------------------------------------------------|--|--|
| <b>691</b> | salvianduline D | <i>Salvia miniata</i> | <i>Phytochemistry</i> , 2011, <b>72</b> , 265-275 |  |  |
|------------|-----------------|-----------------------|---------------------------------------------------|--|--|

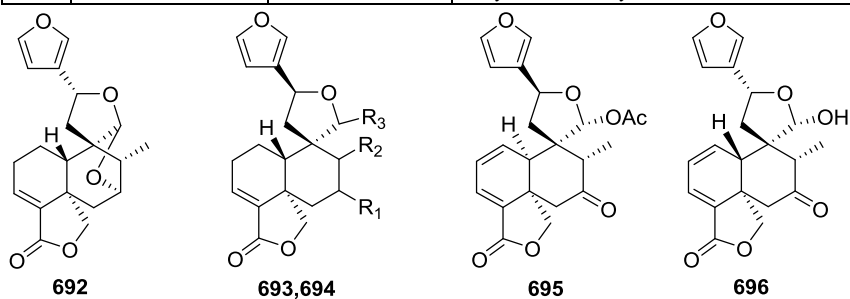

|            |                                       |             |             |              |                           |                                                         |
|------------|---------------------------------------|-------------|-------------|--------------|---------------------------|---------------------------------------------------------|
| <b>692</b> | <i>trans</i> -1,2-dihydrosalvifaricin | —           | —           | —            | <i>Salvia fulgens</i>     | <i>J. Nat. Med.</i> , 2006, <b>60</b> , 58-63           |
| <b>693</b> | —                                     | =O          | $\beta$ Me  | $\alpha$ OAc | <i>Salvia miniata</i>     | <i>Phytochemistry</i> , 2011, <b>72</b> , 265-275       |
| <b>694</b> | —                                     | $\alpha$ OH | $\alpha$ Me | $\beta$ OAc  |                           |                                                         |
| <b>695</b> | salvifolin                            | —           | —           | —            | <i>Salvia tiliaefolia</i> | <i>J. Org. Chem.</i> , 1990, <b>55</b> , 3522-3525      |
| <b>696</b> | dugesin F                             | —           | —           | —            | <i>Salvia dugesii</i>     | <i>Nat. Prod. Bioprospect.</i> , 2011, <b>1</b> , 81-86 |

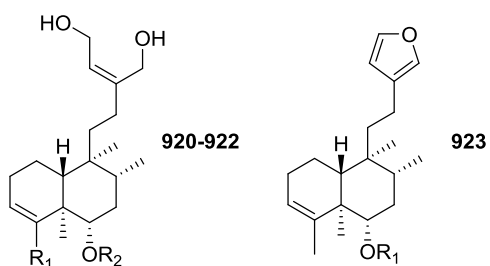

|            |                |                                     |                                     |                       |                                                     |
|------------|----------------|-------------------------------------|-------------------------------------|-----------------------|-----------------------------------------------------|
| <b>920</b> | salvigreside A | Me                                  | $\beta$ -D-Glc                      | <i>Salvia greggii</i> | <i>Phytochemistry</i> , 2004, <b>65</b> , 2577-2581 |
| <b>921</b> | salvigreside B | Me                                  | 6- <i>O</i> -acetyl- $\beta$ -D-Glc |                       |                                                     |
| <b>922</b> | salvigreside C | CH <sub>2</sub> OH                  | 6- <i>O</i> -acetyl- $\beta$ -D-Glc |                       |                                                     |
| <b>923</b> | salvigreside D | 6- <i>O</i> -acetyl- $\beta$ -D-Glc | —                                   |                       |                                                     |

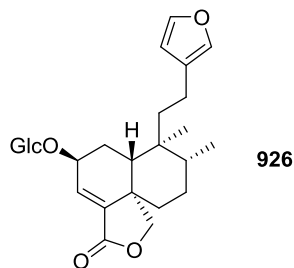

|            |             |                          |                                                     |
|------------|-------------|--------------------------|-----------------------------------------------------|
| <b>926</b> | amarisolide | <i>Salvia amarissima</i> | <i>Phytochemistry</i> , 1996, <b>42</b> , 1105-1108 |
|------------|-------------|--------------------------|-----------------------------------------------------|

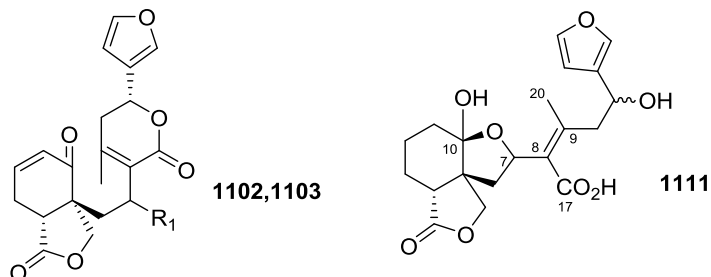

|             |                 |              |                             |                                                     |
|-------------|-----------------|--------------|-----------------------------|-----------------------------------------------------|
| <b>1102</b> | salvianduline A | $\alpha$ OAc | <i>Salvia lavanduloides</i> | <i>Phytochemistry</i> , 1991, <b>30</b> , 3357-3360 |
| <b>1103</b> | salvianduline B | $\beta$ OH   |                             |                                                     |
| <b>1111</b> | —               | —            | <i>Salvia miniata</i>       | <i>Phytochemistry</i> , 2011, <b>72</b> , 265-275   |

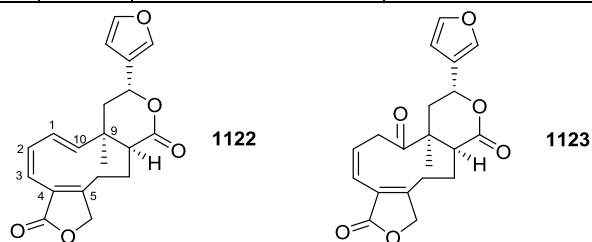

|             |                     |                           |                                                    |
|-------------|---------------------|---------------------------|----------------------------------------------------|
| <b>1122</b> | salvimicrophyllin A | <i>Salvia microphylla</i> | <i>J. Nat. Prod.</i> , 2014, <b>77</b> , 1088-1092 |
| <b>1123</b> | salvimicrophyllin B |                           |                                                    |

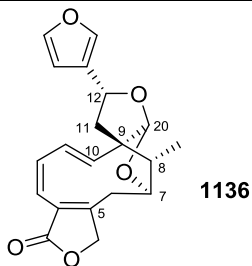

|             |            |                          |                                                          |
|-------------|------------|--------------------------|----------------------------------------------------------|
| <b>1136</b> | tonalensin | <i>Salvia tonalensis</i> | <i>J. Chem. Crystallogr.</i> , 1996, <b>26</b> , 239-242 |
|-------------|------------|--------------------------|----------------------------------------------------------|

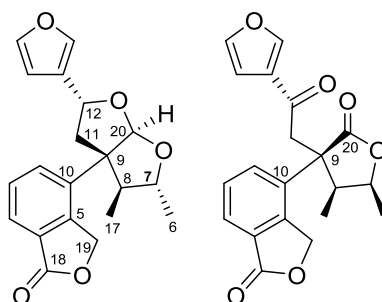

1140

1141

|             |                  |                           |                                                     |
|-------------|------------------|---------------------------|-----------------------------------------------------|
| <b>1140</b> | rhyacophiline    | <i>Salvia rhyacophila</i> | <i>Tetrahedron</i> , 1991, <b>47</b> , 7199-7208    |
| <b>1141</b> | salvireptanolide | <i>Salvia reptans</i>     | <i>Phytochemistry</i> , 1991, <b>30</b> , 2335-2338 |

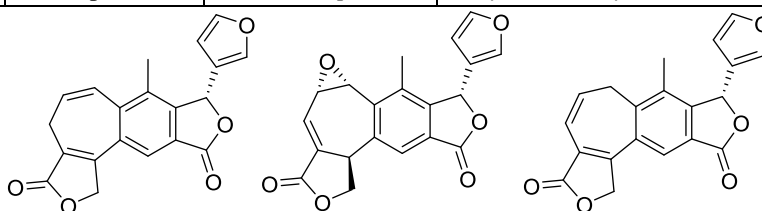

1161

1162

1163

|             |                    |                         |                                                     |
|-------------|--------------------|-------------------------|-----------------------------------------------------|
| <b>1161</b> | isosalvipuberulin  | <i>Salvia leucantha</i> | <i>J. Nat. Med.</i> , 2006, <b>60</b> , 206-209     |
| <b>1162</b> | salvileucantholide |                         | <i>Tetrahedron</i> , 1994, <b>50</b> , 11593-11600  |
| <b>1163</b> | dugesin B          | <i>Salvia dugesii</i>   | <i>Helv. Chim. Acta</i> , 2004, <b>87</b> , 949-955 |

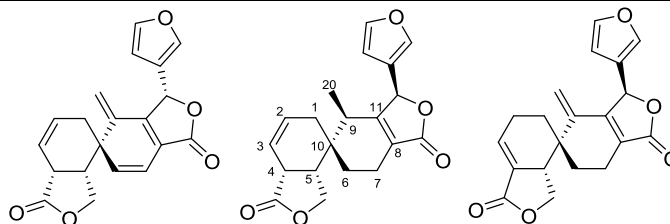

1164

1165

1166

|             |                    |                            |                                                         |
|-------------|--------------------|----------------------------|---------------------------------------------------------|
| <b>1164</b> | spiroleucantholide | <i>Salvia leucantha</i>    | <i>J. Nat. Med.</i> , 2006, <b>60</b> , 206-209         |
| <b>1165</b> | salvioccidentalin  | <i>Salvia occidentalis</i> | <i>Molecules</i> , 2011, <b>16</b> , 9109-9115          |
| <b>1166</b> | dugesin C          | <i>Salvia dugesii</i>      | <i>Nat. Prod. Bioprospect.</i> , 2011, <b>1</b> , 81-86 |

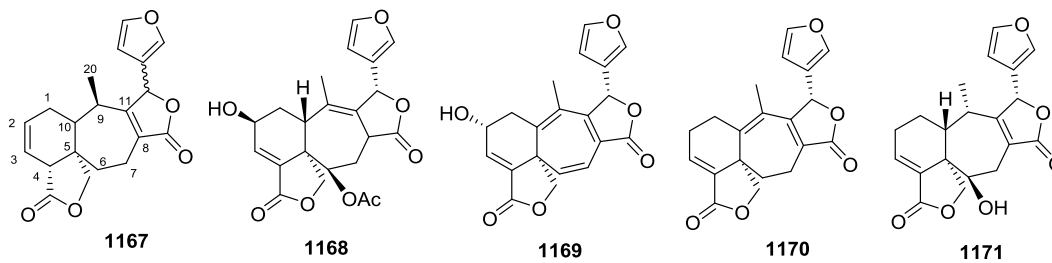

1167

1168

1169

1170

1171

|             |                                 |                              |                                                     |
|-------------|---------------------------------|------------------------------|-----------------------------------------------------|
| <b>1167</b> | blepharolide B                  | <i>Salvia blepharophylla</i> | <i>Phytochemistry</i> , 1999, <b>52</b> , 1535-1540 |
| <b>1168</b> | 2 $\beta$ -hydroxysalvigenolide | <i>Salvia xalapensis</i>     | <i>J. Nat. Prod.</i> , 2005, <b>68</b> , 787-790    |

|             |                |                         |                                                         |
|-------------|----------------|-------------------------|---------------------------------------------------------|
| <b>1169</b> | salviandulin E | <i>Salvia leucantha</i> | <i>Tetrahedron</i> , 1994, <b>50</b> , 11593-11600      |
| <b>1170</b> | dugesin A      | <i>Salvia dugesii</i>   | <i>Helv. Chim. Acta</i> , 2004, <b>87</b> , 949-955     |
| <b>1171</b> | dugesin D      |                         | <i>Nat. Prod. Bioprospect.</i> , 2011, <b>1</b> , 81-86 |

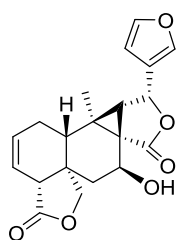

**1172**

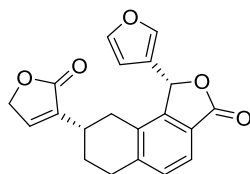

**1173**

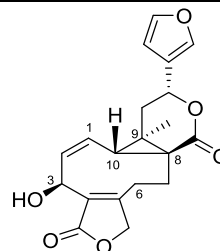

**1180**

|             |                      |                              |                                                     |
|-------------|----------------------|------------------------------|-----------------------------------------------------|
| <b>1172</b> | blepharolide A       | <i>Salvia blepharophylla</i> | <i>Phytochemistry</i> , 1999, <b>52</b> , 1535-1540 |
| <b>1173</b> | tilifodiolide        | <i>Salvia dugesii</i>        | <i>J. Org. Chem.</i> , 1990, <b>55</b> , 3522-3525  |
| <b>1180</b> | microphyllandioliide | <i>Salvia microphylla</i>    | <i>Org. Lett.</i> , 2013, <b>15</b> , 3210-3213     |

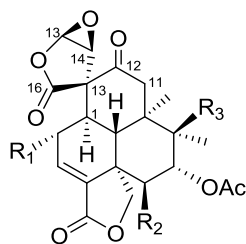

**1207-1210**

|             |                     | R1 | R2 | R3 |                          |                                                      |
|-------------|---------------------|----|----|----|--------------------------|------------------------------------------------------|
| <b>1207</b> | salvilanguiduline A | H  | H  | H  | <i>Salvia languidula</i> | <i>Tetrahedron Lett.</i> , 1992, <b>33</b> , 581-584 |
| <b>1208</b> | salvilanguiduline B | OH | H  | H  |                          |                                                      |
| <b>1209</b> | salvilanguiduline C | H  | OH | H  |                          |                                                      |
| <b>1210</b> | salvilanguiduline D | H  | H  | OH |                          |                                                      |

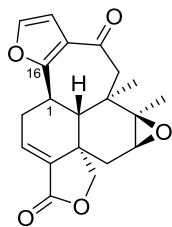

**1222**

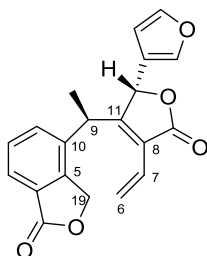

**1223**

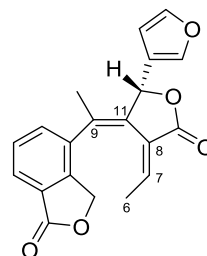

**1224**

|             |                     |                          |                                                  |
|-------------|---------------------|--------------------------|--------------------------------------------------|
| <b>1222</b> | salvixalapoxide     | <i>Salvia xalapensis</i> | <i>J. Nat. Prod.</i> , 2005, <b>68</b> , 787-790 |
| <b>1223</b> | salvixalapadiene    |                          |                                                  |
| <b>1224</b> | isosalvixalapadiene |                          |                                                  |

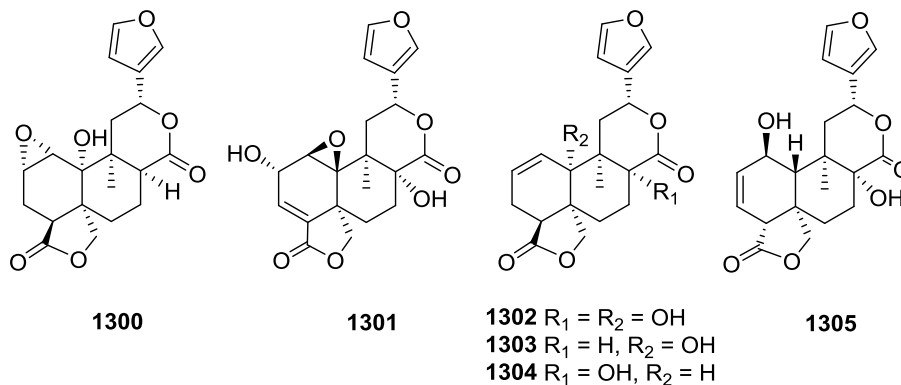

|             |              |                        |                                                    |
|-------------|--------------|------------------------|----------------------------------------------------|
| <b>1300</b> | seulpturin A | <i>Salvia shannoni</i> | <i>J. Nat. Prod.</i> , 2013, <b>76</b> , 1970-1975 |
| <b>1301</b> | seulpturin B |                        |                                                    |
| <b>1302</b> | seulpturin C |                        |                                                    |
| <b>1303</b> | seulpturin D |                        |                                                    |
| <b>1304</b> | seulpturin E |                        |                                                    |
| <b>1305</b> | seulpturin F |                        |                                                    |

### SCAPANIA Genus

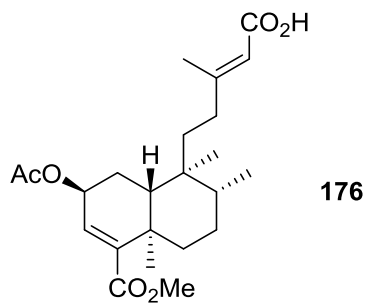

|            |                                                           |                           |                                                     |
|------------|-----------------------------------------------------------|---------------------------|-----------------------------------------------------|
| <b>176</b> | 2β-acetoxy-19-carboxymethyl-cleroda-3,13-dien-15-oic acid | <i>Scapania bolandeli</i> | <i>Phytochemistry</i> , 1999, <b>52</b> , 1551-1553 |
|------------|-----------------------------------------------------------|---------------------------|-----------------------------------------------------|

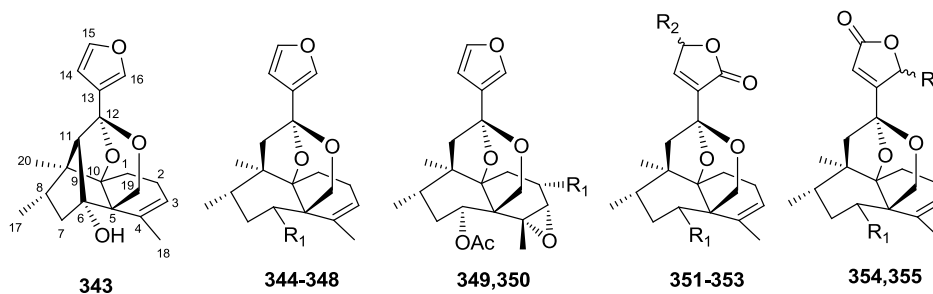

|            |             |    |    |                       |                                                 |
|------------|-------------|----|----|-----------------------|-------------------------------------------------|
|            |             | R1 | R2 |                       |                                                 |
| <b>343</b> | scaparvin A | —  | —  | <i>Scapania parva</i> | <i>Org. Lett.</i> , 2010, <b>12</b> , 4404-4407 |
| <b>344</b> | scaparvin B | =O | —  |                       |                                                 |



|     |                 |              |    |                            |                                                                   |
|-----|-----------------|--------------|----|----------------------------|-------------------------------------------------------------------|
| 345 | scaparvin C     | $\alpha$ OH  | —  |                            |                                                                   |
| 346 | scaparvin D     | $\alpha$ OAc | —  |                            |                                                                   |
| 347 | parvitexin A    | H            | —  | <i>Scapania parvitexta</i> | <i>Biosci. Biotechnol. Biochem.</i> , 2007, <b>71</b> , 2751-2758 |
| 348 | parvitexin B    | $\beta$ OAc  | —  |                            |                                                                   |
| 349 | parvitexin C    | $\beta$ OH   | —  |                            |                                                                   |
| 350 | scaparvin E     | OAc          | —  | <i>Scapania parva</i>      | <i>Org. Lett.</i> , 2010, <b>12</b> , 4404-4407                   |
| 351 | stephanialide A | =O           | OH | <i>Scapania stephanii</i>  | <i>Phytochemistry</i> , 2014, <b>105</b> , 85-91                  |
| 352 | stephanialide B | $\beta$ OH   | OH |                            |                                                                   |
| 353 | stephanialide C | $\beta$ OAc  | OH |                            |                                                                   |
| 354 | stephanialide D | =O           | OH |                            |                                                                   |
| 355 | stephanialide E | $\beta$ OAc  | OH |                            |                                                                   |

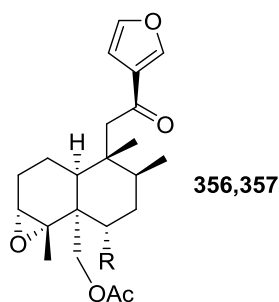

|            |              |     |                            |                                                                   |
|------------|--------------|-----|----------------------------|-------------------------------------------------------------------|
| <b>356</b> | parvitexin D | OAc | <i>Scapania parvitexta</i> | <i>Biosci. Biotechnol. Biochem.</i> , 2007, <b>71</b> , 2751-2758 |
| <b>357</b> | parvitexin E | OH  |                            |                                                                   |

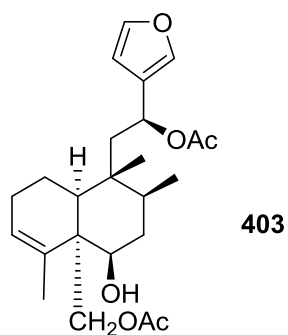

|            |             |                       |                                                    |
|------------|-------------|-----------------------|----------------------------------------------------|
| <b>403</b> | scaparvin F | <i>Scapania parva</i> | <i>Phytochem. Lett.</i> , 2012, <b>5</b> , 535-540 |
|------------|-------------|-----------------------|----------------------------------------------------|

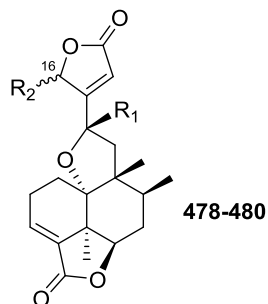

|            |               | R1  | R2  |                         |                                                       |
|------------|---------------|-----|-----|-------------------------|-------------------------------------------------------|
| <b>478</b> | ciliatolide B | OEt | OH  | <i>Scapania ciliata</i> | <i>Chem. Biodivers.</i> , 2013, <b>10</b> , 1606-1612 |
| <b>479</b> | ciliatolide C | OMe | OH  |                         |                                                       |
| <b>480</b> | ciliatolide D | OEt | OEt |                         |                                                       |

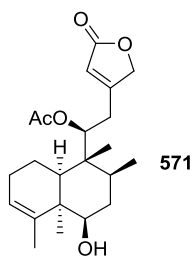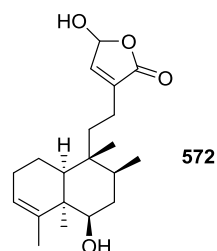

|            |                |                       |                                                    |
|------------|----------------|-----------------------|----------------------------------------------------|
| <b>571</b> | scapanialide A | <i>Scapania parva</i> | <i>Phytochem. Lett.</i> , 2012, <b>5</b> , 535–540 |
| <b>572</b> | scapanialide C |                       |                                                    |

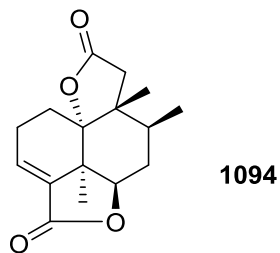

|             |               |                         |                                                       |
|-------------|---------------|-------------------------|-------------------------------------------------------|
| <b>1094</b> | ciliatolide A | <i>Scapania ciliata</i> | <i>Chem. Biodivers.</i> , 2013, <b>10</b> , 1606-1612 |
|-------------|---------------|-------------------------|-------------------------------------------------------|

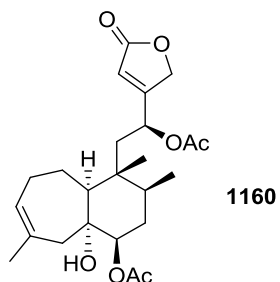

|             |                |                       |                                                    |
|-------------|----------------|-----------------------|----------------------------------------------------|
| <b>1160</b> | scapanialide B | <i>Scapania parva</i> | <i>Phytochem. Lett.</i> , 2012, <b>5</b> , 535–540 |
|-------------|----------------|-----------------------|----------------------------------------------------|

**SCUTELLARIA Genus**

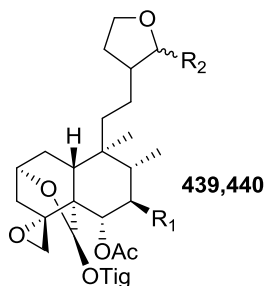

|            |              |      |            |                                 |                                                                                                         |
|------------|--------------|------|------------|---------------------------------|---------------------------------------------------------------------------------------------------------|
| <b>439</b> | scutegalin B | OH   | $\beta$ OH | <i>Scutellaria galericulata</i> | <i>Phytochemistry</i> , 1993, <b>33</b> , 309-315,<br><i>Phytochemistry</i> , 1996, <b>41</b> , 247-253 |
| <b>440</b> | scutegalin C | OTig | OH         |                                 |                                                                                                         |

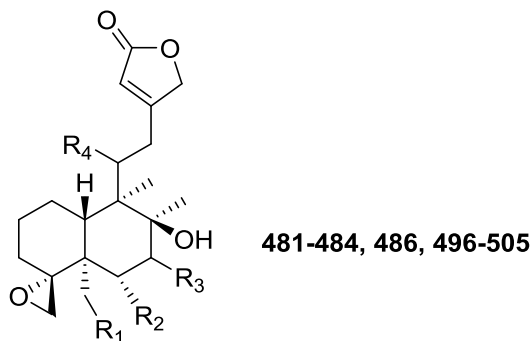

|            |                                                                                                                                       | R1                  | R2             | R3                     | R4          |                               |                                                                                                             |
|------------|---------------------------------------------------------------------------------------------------------------------------------------|---------------------|----------------|------------------------|-------------|-------------------------------|-------------------------------------------------------------------------------------------------------------|
| <b>481</b> | scutorientalin C                                                                                                                      | CH <sub>2</sub> OH  | OiBu           | H                      | $\beta$ OAc | <i>Scutellaria orientalis</i> | <i>Phytochemistry</i> , 1996, <b>43</b> , 173-178                                                           |
| <b>482</b> | scutalpin H                                                                                                                           | CH <sub>2</sub> OAc | Y <sub>1</sub> | H                      | $\beta$ OAc | <i>Scutellaria alpina</i>     | <i>Phytochemistry</i> , 1995, <b>38</b> , 181-187                                                           |
| <b>483</b> | scutalpin I                                                                                                                           | CH <sub>2</sub> OAc | OBz            | H                      | $\beta$ OAc |                               |                                                                                                             |
| <b>484</b> | scutalpin L                                                                                                                           | CH <sub>2</sub> OAc | OBz            | $\beta$ OBz            | H           |                               |                                                                                                             |
| <b>486</b> | scutalpin N                                                                                                                           | CH <sub>2</sub> OAc | OBz            | $\beta$ OBz            | H           | <i>Scutellaria alpina</i>     | <i>Phytochemistry</i> , 1998, <b>49</b> , 2449-2452                                                         |
| <b>496</b> | (4 <i>S</i> ,11 <i>S</i> )-11-acetoxy-8 $\beta$ ,19-dihydroxy-6 $\alpha$ -tigloyloxy-4,18-epoxy- <i>neo</i> -clerod-13-en-15,16-olide | CH <sub>2</sub> OH  | OTig           | H                      | OAc         | <i>Scutellaria alpina</i>     | <i>Yakugaku Zasshi</i> , 1994, <b>114</b> , 264-271,<br><i>Phytochemistry</i> , 1993, <b>34</b> , 1589-1594 |
| <b>497</b> | scutalpin C                                                                                                                           | CH <sub>2</sub> OAc | OTig           | H                      | $\beta$ OH  | <i>Scutellaria polyodon</i>   | <i>J. Nat. Prod.</i> , 1997, <b>60</b> , 1229-1235                                                          |
| <b>498</b> | scupolin A                                                                                                                            | CH <sub>2</sub> OH  | Y <sub>1</sub> | H                      | $\beta$ OAc |                               |                                                                                                             |
| <b>499</b> | scupolin B                                                                                                                            | CH <sub>2</sub> OAc | OAc            | H                      | $\beta$ OAc |                               |                                                                                                             |
| <b>500</b> | scupolin C                                                                                                                            | CH <sub>2</sub> OBz | OBz            | H                      | $\beta$ OAc |                               |                                                                                                             |
| <b>501</b> | scupolin D                                                                                                                            | CH <sub>2</sub> OH  | OH             | $\beta$ Y <sub>1</sub> | $\beta$ OAc |                               |                                                                                                             |
| <b>502</b> | scupolin E                                                                                                                            | CH <sub>2</sub> OH  | Y <sub>1</sub> | $\beta$ OH             | $\beta$ OAc |                               |                                                                                                             |
| <b>503</b> | scupolin F                                                                                                                            | CO <sub>2</sub> H   | Y <sub>1</sub> | H                      | H           |                               |                                                                                                             |
| <b>504</b> | scutorientalin E                                                                                                                      | CH <sub>2</sub> OAc | OCin           | $\beta$ OAc            | H           | <i>Scutellaria orientalis</i> | <i>Phytochemistry</i> 1997, <b>46</b> , 587-589                                                             |

|     |              |    |      |   |   |                               |                                                     |
|-----|--------------|----|------|---|---|-------------------------------|-----------------------------------------------------|
| 505 | hastifolin A | Me | OCin | H | H | <i>Scutellaria hastifolia</i> | <i>Phytochemistry</i> , 2010, <b>71</b> , 2087-2091 |
|-----|--------------|----|------|---|---|-------------------------------|-----------------------------------------------------|

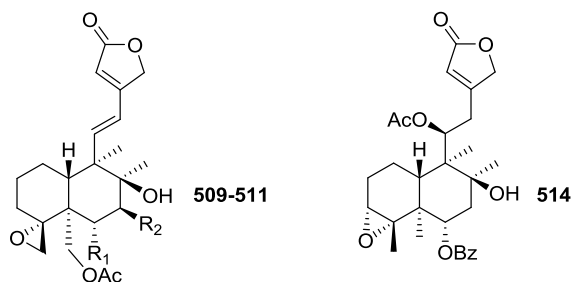

|     |                                                                                                          | R1   | R2  |                              |                                                       |
|-----|----------------------------------------------------------------------------------------------------------|------|-----|------------------------------|-------------------------------------------------------|
| 509 | (4 <i>S</i> )-19-acetoxy-8β-hydroxy-6α-tigloyloxy-4,18-epoxy- <i>neo</i> -cleroda-11,13-dien-15,16-olide | OTig | H   | <i>Scutellaria alpina</i>    | <i>Yakugaku Zasshi</i> , 1994, <b>114</b> , 264-271   |
| 510 | scutalpin J                                                                                              | OBz  | H   |                              | <i>Phytochemistry</i> , 1995, <b>38</b> , 181-187     |
| 511 | scutalpin K                                                                                              | OBz  | OBz |                              |                                                       |
| 514 | scuterivulactone A                                                                                       | --   | --  | <i>Scutellaria rivularis</i> | <i>Chem. Pharm. Bull.</i> , 1997, <b>45</b> , 152-160 |

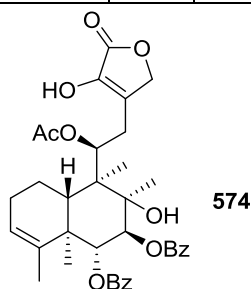

|     |             |                            |                                                  |
|-----|-------------|----------------------------|--------------------------------------------------|
| 574 | scutebata A | <i>Scutellaria barbata</i> | <i>J. Nat. Prod.</i> , 2010, <b>73</b> , 233-236 |
|-----|-------------|----------------------------|--------------------------------------------------|

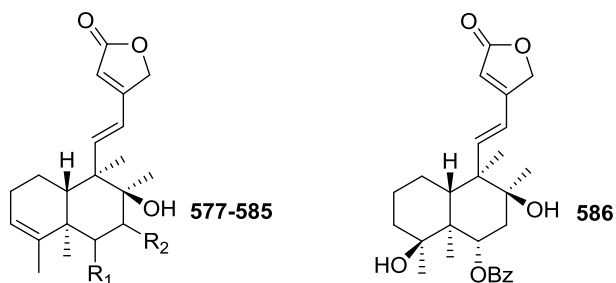

|     |                                                        | R1              | R2             |                            |                                                                                                                                                                                                                                                                                 |
|-----|--------------------------------------------------------|-----------------|----------------|----------------------------|---------------------------------------------------------------------------------------------------------------------------------------------------------------------------------------------------------------------------------------------------------------------------------|
| 577 | barbatin C                                             | αOH             | βOH            | <i>Scutellaria barbata</i> | <i>J. Integr. Plant Biol.</i> , 2008, <b>50</b> , 699-702,<br><i>Fitoterapia</i> , 2010, <b>81</b> , 737-741,<br><i>Planta Med.</i> , 2011, <b>77</b> , 1536-1541,<br><i>Phytochemistry</i> , 2006, <b>67</b> , 1326-1330,<br><i>Planta Med.</i> , 2007, <b>73</b> , 1217-1220, |
| 578 | barbatin D                                             | αOBz            | βOBz           |                            |                                                                                                                                                                                                                                                                                 |
| 579 | barbatin E                                             | Y <sub>4</sub>  | M <sub>1</sub> |                            |                                                                                                                                                                                                                                                                                 |
| 580 | scutebata I                                            | αOAc            | βOH            |                            |                                                                                                                                                                                                                                                                                 |
| 581 | scutebata J                                            | αOBz            | βOH            |                            |                                                                                                                                                                                                                                                                                 |
| 582 | scutebata K                                            | αY <sub>9</sub> | βOH            |                            |                                                                                                                                                                                                                                                                                 |
| 583 | 6,7-di- <i>O</i> -acetoxybarbatin A                    | αOAc            | βOAc           |                            |                                                                                                                                                                                                                                                                                 |
| 584 | 6-(2,3-epoxy-2-isopropyl- <i>n</i> -propoxy)barbatin C | αM <sub>2</sub> | βOH            |                            |                                                                                                                                                                                                                                                                                 |

|     |                     |              |            |                              |                                                             |
|-----|---------------------|--------------|------------|------------------------------|-------------------------------------------------------------|
| 585 | 6-acetoxybarbatin C | $\alpha$ OAc | $\beta$ OH |                              | <i>J. Asian Nat. Prod. Res.</i> , 2010, <b>12</b> , 859-864 |
| 586 | scuterivulactone D  | —            | —          | <i>Scutellaria rivularis</i> | <i>Chem. Pharm. Bull.</i> , 1997, <b>45</b> , 152-160       |

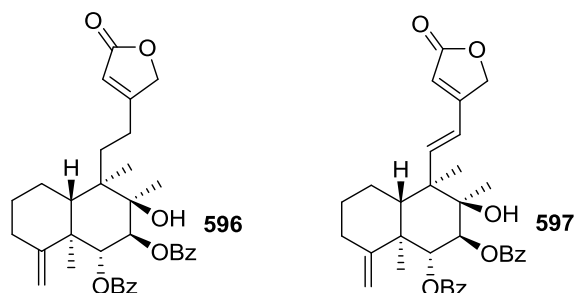

|     |               |                                |                                                   |
|-----|---------------|--------------------------------|---------------------------------------------------|
| 596 | scutebaicalin | <i>Scutellaria baicalensis</i> | <i>Phytochemistry</i> , 1996, <b>43</b> , 835-837 |
| 597 | scutebata L   | <i>Scutellaria barbata</i>     | <i>Planta Med.</i> , 2011, <b>77</b> , 1536-1541  |

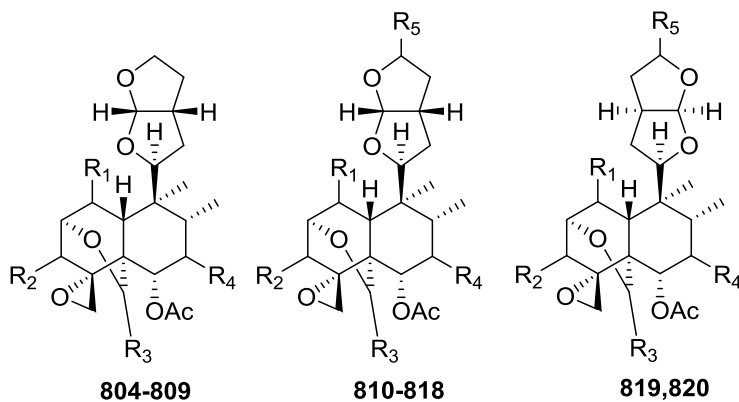

|     |                                                                                | R1           | R2         | R3                     | R4   | R5          |                                               |                                                     |
|-----|--------------------------------------------------------------------------------|--------------|------------|------------------------|------|-------------|-----------------------------------------------|-----------------------------------------------------|
| 805 | 14,15-dihydrojodrellin T                                                       | $\beta$ OTig | H          | OAc                    | H    | —           | <i>Scutellaria galericulata</i>               | <i>Phytochemistry</i> , 1990, <b>29</b> , 1793-1796 |
| 806 | scutegalin A                                                                   | H            | H          | OTig                   | OTig | —           |                                               | <i>Phytochemistry</i> , 1993, <b>33</b> , 309-315   |
| 807 | scutecyprin                                                                    | H            | H          | $\beta$ OTig           | H    | —           | <i>Scutellaria cypria</i> var. <i>elatior</i> | <i>Phytochemistry</i> , 1993, <b>33</b> , 931-932   |
| 808 | scutecolumnin B                                                                | H            | H          | $\beta$ Y <sub>1</sub> | H    | —           | <i>Scutellaria columnae</i>                   | <i>Phytochemistry</i> , 1992, <b>31</b> , 3639-3641 |
| 809 | scutecolumnin C                                                                | H            | H          | $\beta$ OH             | H    | —           |                                               |                                                     |
| 810 | scutecyprol B                                                                  | H            | H          | $\beta$ OTig           | H    | OH          | <i>Scutellaria cypria</i> var. <i>cypria</i>  | <i>Phytochemistry</i> , 1996, <b>42</b> , 555-557   |
| 811 | scupolin K                                                                     | H            | $\beta$ OH | OiBu                   | H    | OH          | <i>Scutellaria polyodon</i>                   | <i>J. Nat. Prod.</i> , 2000, <b>63</b> , 1032-1034  |
| 812 | 6 $\alpha$ -O-acetyl-15 $\beta$ ,19 $\beta$ -di-O-ethyl-2,19:4,18:11,16:15,16- | H            | H          | OEt                    | H    | $\beta$ OEt | <i>Scutellaria discolor</i>                   | <i>Chem. Pharm. Bull.</i> , 1996, <b>44</b> ,       |

|     |                                                                                                                     |   |   |              |   |              |                                                 |                                                     |
|-----|---------------------------------------------------------------------------------------------------------------------|---|---|--------------|---|--------------|-------------------------------------------------|-----------------------------------------------------|
|     | tetraepoxyneoclerodane-6,15,19-triol                                                                                |   |   |              |   |              |                                                 | 1540-1545                                           |
| 813 | 6 $\alpha$ -O-acetyl-15 $\alpha$ ,19 $\beta$ -di-O-ethyl-2,19:4,18:11,16:15,16-tetraepoxyneoclerodane-6,15,19-triol | H | H | OEt          | H | $\alpha$ OEt |                                                 |                                                     |
| 814 | 6 $\alpha$ -O-acetyl-19 $\beta$ -O-ethyl-2,19:4,18:11,16:15,16-tetraepoxyneoclerodane-6,15,19-triol                 | H | H | OEt          | H | OH           |                                                 |                                                     |
| 815 | 6 $\alpha$ ,19-di-O-acetyl-2,19:4,18:11,16:15,16-tetraepoxyneoclerodane-6,15,19-triol                               | H | H | OAc          | H | OH           |                                                 |                                                     |
| 816 | scutalbin B                                                                                                         | H | H | $\beta$ Y1   | H | OH           | <i>Scutellaria albida</i>                       | <i>Phytochemistry</i> , 1996, <b>42</b> , 1059-1064 |
| 817 | scutalbin C                                                                                                         | H | H | $\beta$ OH   | H | OH           |                                                 |                                                     |
| 818 | scutalsin                                                                                                           | H | H | $\beta$ OiBu | H | OH           | <i>Scutellaria altissima</i>                    |                                                     |
| 819 | 11-episcuteceprin                                                                                                   | H | H | $\beta$ OTig | H | H            | <i>Scutellaria columnae</i>                     | <i>Phytochemistry</i> , 1997, <b>46</b> , 955-958   |
| 820 | 11-epi-scutecolumnin C                                                                                              | H | H | $\beta$ OH   | H | H            | <i>Scutellaria columnae</i> var <i>columnae</i> | <i>Phytochemistry</i> , 1998, <b>49</b> , 811-815   |

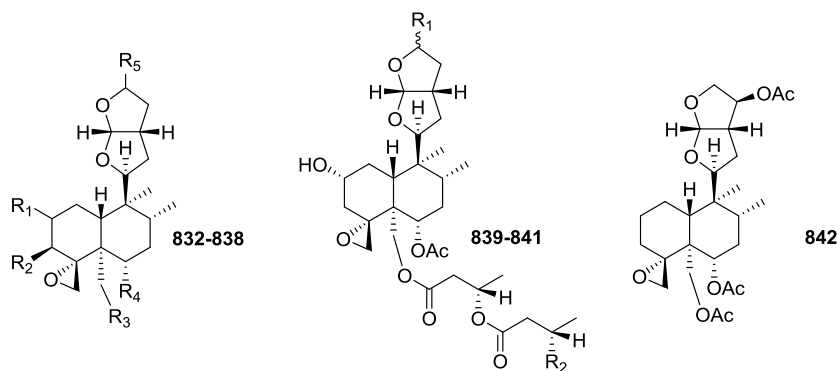

|     |                                          |    |     |      |     |              |                                              |                                                         |
|-----|------------------------------------------|----|-----|------|-----|--------------|----------------------------------------------|---------------------------------------------------------|
|     |                                          | R1 | R2  | R3   | R4  | R5           |                                              |                                                         |
| 832 | 15 $\beta$ -ethoxy-14-hydroclerodin      | H  | H   | OAc  | OAc | $\beta$ OEt  | <i>Scutellaria discolor</i>                  | <i>Chem. Pharm. Bull.</i> , 1996, <b>44</b> , 1540-1545 |
| 833 | 15 $\alpha$ -ethoxy-14-hydroclerodin     | H  | H   | OAc  | OAc | $\alpha$ OEt |                                              |                                                         |
| 834 | 14-hydro-15-hydroxy-6-O-deacetylclerodin | H  | H   | OAc  | OH  | OH           |                                              |                                                         |
| 835 | scutelaterin C                           | Y1 | H   | OAc  | OAc | OH           | <i>Scutellaria lateriflora</i>               | <i>Phytochemistry</i> , 1998, <b>48</b> , 687-691       |
| 836 | scutellin A                              | H  | H   | OPr  | OAc | $\beta$ OMe  | <i>Scutellaria barbata</i>                   | <i>Yunnan Zhiwu Yanjiu</i> , 2009, <b>31</b> , 474-476  |
| 837 | scutalpin O                              | H  | H   | OiBu | OAc | OH           | <i>Scutellaria alpine</i>                    | <i>Phytochemistry</i> , 1998, <b>49</b> , 2449-2452     |
| 838 | scuteceprol A                            | H  | H   | OAc  | OAc | OH           | <i>Scutellaria cypria</i> var. <i>cypria</i> | <i>Phytochemistry</i> , 1996, <b>42</b> , 555-557       |
| 839 | scupontin C                              | H  | OAc | —    | —   | —            | <i>Scutellaria</i>                           | <i>J. Nat. Prod.</i> , 1997, <b>60</b> ,                |

|            |             |    |                 |   |   |   |                           |                                                   |
|------------|-------------|----|-----------------|---|---|---|---------------------------|---------------------------------------------------|
| <b>840</b> | scupontin D | OH | OAc             | — | — | — | <i>pontica</i>            | 348-355                                           |
| <b>841</b> | scupontin F | OH | OX <sub>6</sub> | — | — | — |                           |                                                   |
| <b>842</b> | scutalpin M | —  | —               | — | — | — | <i>Scutellaria alpina</i> | <i>Phytochemistry</i> , 1995, <b>38</b> , 181-187 |

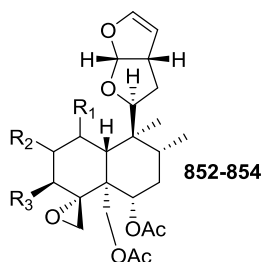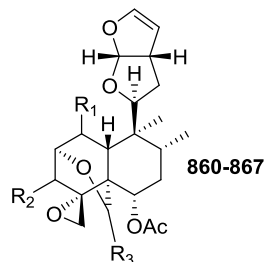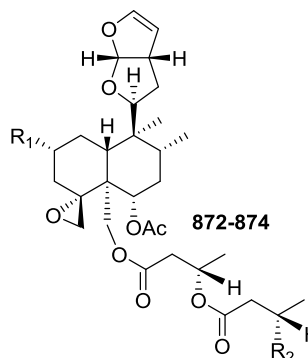

|            |                           | R1           | R2                     | R3                     |                                 |                                                         |
|------------|---------------------------|--------------|------------------------|------------------------|---------------------------------|---------------------------------------------------------|
| <b>852</b> | galericulin               | H            | $\alpha$ OH            | OTig                   | <i>Scutellaria galericulata</i> | <i>Phytochemistry</i> , 1990, <b>29</b> , 1793-1796     |
| <b>853</b> | scutelaterin A            | H            | $\beta$ OAc            | H                      | <i>Scutellaria laterifora</i>   | <i>Phytochemistry</i> , 1998, <b>48</b> , 687-691       |
| <b>854</b> | scutelaterin B            | H            | $\beta$ Y <sub>1</sub> | H                      |                                 |                                                         |
| <b>860</b> | jodrellin A               | H            | H                      | $\beta$ OAc            | <i>Scutellaria</i> spp.         | <i>Phytochemistry</i> , 1991, <b>30</b> , 1125-1127     |
| <b>861</b> | jodrellin B               | H            | H                      | $\beta$ OiPr           |                                 |                                                         |
| <b>862</b> | scupolin J                | H            | $\beta$ OH             | OiBu                   | <i>Scutellaria polyodon</i>     | <i>J. Nat. Prod.</i> , 2000, <b>63</b> , 1032-1034      |
| <b>863</b> | jodrellin T               | $\beta$ OTig | H                      | $\beta$ OAc            | <i>Scutellaria galericulata</i> | <i>Phytochemistry</i> , 1990, <b>29</b> , 1793-1796     |
| <b>864</b> | 19-O-deacetyl-jodrellin A | H            | H                      | OH                     | <i>Scutellaria discolor</i>     | <i>Chem. Pharm. Bull.</i> , 1996, <b>44</b> , 1540-1545 |
| <b>865</b> | scutegrossin A            | H            | H                      | $\beta$ OTig           | <i>Scutellaria grossa</i>       | <i>Chem. Pharm. Bull.</i> , 1997, <b>45</b> , 1097-1100 |
| <b>866</b> | scutalbin A               | H            | H                      | $\beta$ OH             | <i>Scutellaria albida</i>       | <i>Phytochemistry</i> , 1996, <b>42</b> , 1059-1064     |
| <b>867</b> | scutecolumnin A           | H            | H                      | $\beta$ Y <sub>1</sub> | <i>Scutellaria columnae</i>     | <i>Phytochemistry</i> , 1992, <b>31</b> , 3639-3641     |
| <b>872</b> | scupontin A               | OH           | OAc                    | —                      | <i>Scutellaria pontica</i>      | <i>J. Nat. Prod.</i> , 1997, <b>60</b> , 348-355        |
| <b>873</b> | scupontin B               | H            | OAc                    | —                      |                                 |                                                         |
| <b>874</b> | scupontin E               | OH           | X <sub>6</sub>         | —                      |                                 |                                                         |

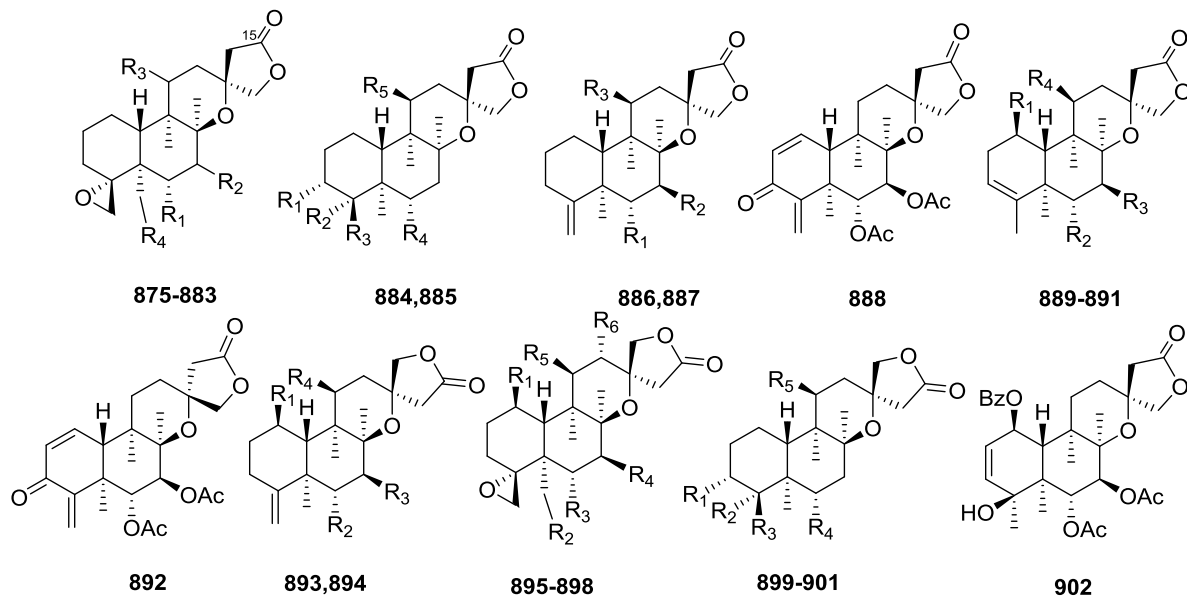

|            |                                 | R <sub>1</sub> | R <sub>2</sub> | R <sub>3</sub>     | R <sub>4</sub> | R <sub>5</sub> | R <sub>6</sub> |                                                         |                                                       |
|------------|---------------------------------|----------------|----------------|--------------------|----------------|----------------|----------------|---------------------------------------------------------|-------------------------------------------------------|
| <b>875</b> | scutorientalin A                | OiBu           | H              | H                  | OAc            |                |                | <i>Scutellaria orientalis</i> subsp. <i>pinnatifida</i> | <i>Phytochemistry</i> , 1996, <b>43</b> , 173-178     |
| <b>876</b> | scutorientalin C                | OiBu           | H              | αOH                | OAc            |                |                |                                                         | <i>Phytochemistry</i> , 1997, <b>44</b> , 121-124     |
| <b>877</b> | scutorientalin D                | OiBu           | H              | βOAc               | OAc            |                |                |                                                         | <i>Phytochemistry</i> , 1993, <b>34</b> , 1589-1594   |
| <b>878</b> | scutalpin D                     | OTig           | H              | βOAc               | OAc            |                |                | <i>Scutellaria alpina</i> subsp. <i>javalambrensis</i>  | <i>Phytochemistry</i> , 1997, <b>44</b> , 593-597     |
| <b>879</b> | 11-deacetylscutalpin D          | OTig           | H              | βOH                | OAc            |                |                |                                                         | <i>Phytochemistry</i> , 1993, <b>34</b> , 453-456     |
| <b>880</b> | scutalpin A                     | Y <sub>1</sub> | βOAc           | H                  | OAc            |                |                | <i>Scutellaria alpina</i>                               | <i>Phytochemistry</i> , 1994, <b>35</b> , 1285-1288   |
| <b>881</b> | scutalpin F                     | OAc            | βOAc           | H                  | OAc            |                |                |                                                         | <i>Phytochemistry</i> , 1995, <b>38</b> , 181-187     |
| <b>882</b> | scutalpin G                     | OBz            | H              | βOAc               | OAc            |                |                |                                                         | <i>Phytochemistry</i> , 2010, <b>71</b> , 2087-2091.  |
| <b>883</b> | hastifolin C                    | OCin           | H              | H                  | H              |                |                | <i>Scutellaria hastifolia</i>                           | <i>Chem. Pharm. Bull.</i> , 1997, <b>45</b> , 152-160 |
| <b>884</b> | scuterivulactone C <sub>2</sub> | OH             | Me             | OH                 | OBz            | OAc            |                | <i>Scutellaria hastifolia</i>                           | <i>Phytochemistry</i> , 2010, <b>71</b> , 2087-2091.  |
| <b>885</b> | hastifolin E                    | H              | OH             | CH <sub>2</sub> OH | OCin           | H              |                |                                                         | <i>Scutellaria barbata</i>                            |
| <b>886</b> | hastifolin G                    | OCin           | H              | H                  |                |                |                | <i>Helv. Chim. Acta.</i> , 2011, <b>94</b> , 643-649    |                                                       |
| <b>887</b> | barbatin A                      | H              | OBz            | OH                 | OBz            |                |                | <i>Phytochemistry</i> , 2006, <b>67</b> , 1326-1330     |                                                       |
| <b>888</b> | barbatellarine E                |                |                |                    |                |                |                | <i>Helv. Chim. Acta.</i> , 2011, <b>94</b> , 643-649    |                                                       |
| <b>889</b> | barbatin B                      | OBz            | OBz            | OH                 |                |                |                | <i>Phytochemistry</i> , 2006, <b>67</b> , 1326-         |                                                       |



|     |                                 |      |      |                    |      |     |      |                                                        |                                                             |
|-----|---------------------------------|------|------|--------------------|------|-----|------|--------------------------------------------------------|-------------------------------------------------------------|
|     |                                 |      |      |                    |      |     |      |                                                        | 1330                                                        |
| 890 | scutebata D                     | OBz  | OAc  | OAc                | H    |     |      |                                                        | <i>J. Nat. Prod.</i> , 2010, <b>73</b> , 233-236            |
| 891 | scutebata E                     | OiBu | OAc  | OAc                | H    |     |      |                                                        | <i>Chem. Nat. Cmpds.</i> , 2014, <b>50</b> , 256-257        |
| 892 | barbatellarine F                |      |      |                    |      |     |      |                                                        | <i>Phytochemistry</i> , 1998, <b>47</b> , 135-137           |
| 893 | scuteselerin                    | OAc  | OH   | Y <sub>12</sub>    | OAc  |     |      | <i>Scutellaria seleriana</i>                           | <i>Phytochemistry</i> , 2010, <b>71</b> , 2087-2091         |
| 894 | hastifolin F                    | H    | OCin | H                  | H    |     |      | <i>Scutellaria hastifolia</i>                          | <i>Phytochemistry</i> , 1998, <b>49</b> , 1825-1827         |
| 895 | hastifolin B                    | H    | H    | OCin               | H    | H   | H    | <i>Scutellaria orientalis</i> subsp. <i>sintenisii</i> | <i>Phytochemistry</i> , 1994, <b>35</b> , 1285-1288         |
| 896 | scutenisin                      | H    | OH   | OiBu               | OiBu | H   | H    | <i>Scutellaria alpina</i>                              | <i>Heterocycles</i> , 1997, <b>45</b> , 2247-2252           |
| 897 | scutalpin E                     | H    | OAc  | OTig               | OAc  | H   | H    | <i>Scutellaria guatemalensis</i>                       | <i>Phytochemistry</i> , 2010, <b>71</b> , 2087-2091         |
| 898 | scuteguatemalin                 | OiBu | H    | OAc                | H    | OAc | OiBu | <i>Scutellaria rivularis</i>                           | <i>Bioorg. Med. Chem. Lett.</i> , 2010, <b>20</b> , 288-290 |
| 899 | hastifolin D                    | H    | OH   | CH <sub>2</sub> OH | OCin | H   |      | <i>Scutellaria barbata</i>                             |                                                             |
| 900 | scuterivulactone C <sub>1</sub> | OH   | Me   | OH                 | OBz  | OAc |      |                                                        |                                                             |
| 901 | scuterivulactone B              | =O   | Me   | H                  | OBz  | OAc |      |                                                        |                                                             |
| 902 | barbatellarine A                |      |      |                    |      |     |      |                                                        |                                                             |

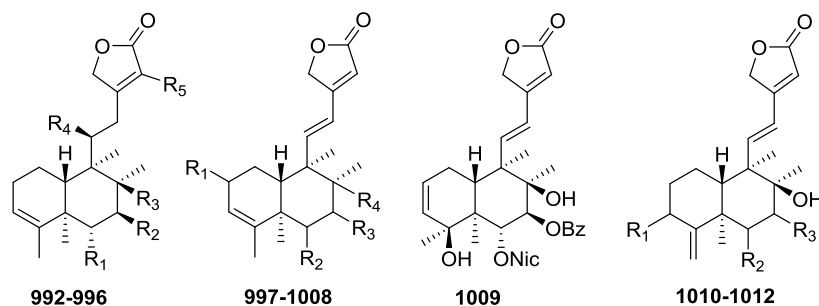

|     |                  |      |      |       |     |    |                            |                                                             |
|-----|------------------|------|------|-------|-----|----|----------------------------|-------------------------------------------------------------|
|     |                  | R1   | R2   | R3    | R4  | R5 |                            |                                                             |
| 992 | scutebarbatine Z | ONic | OH   | H     | H   | H  | <i>Scutellaria barbata</i> | <i>Chem. Pharm. Bull.</i> , 2010, <b>58</b> , 1267-1270     |
| 993 | scutebarbatine X | ONic | ONic | OH    | OAc | OH |                            | <i>J. Nat. Prod.</i> , 2010, <b>73</b> , 233-236            |
| 994 | scutebata B      | ONic | OBz  | OH    | OAc | OH |                            | <i>Bioorg. Med. Chem. Lett.</i> , 2010, <b>20</b> , 288-290 |
| 995 | scutebata C      | ONic | OH   | OH    | OAc | OH |                            | <i>Chem. Pharm. Bull.</i> , 2010, <b>58</b> , 1267-1270     |
| 996 | barbatellarine B | ONic | OBz  | OH    | OAc | H  |                            | <i>J. Nat. Prod.</i> , 2009,                                |
| 997 | scutebarbatine Y | H    | αOBz | βONic | βOH | —  |                            |                                                             |
| 998 | scutehenanine A  | H    | αOH  | βONic | βOH | —  |                            |                                                             |

|      |                                                  |             |                          |                        |              |   |                                                             |               |                                                       |
|------|--------------------------------------------------|-------------|--------------------------|------------------------|--------------|---|-------------------------------------------------------------|---------------|-------------------------------------------------------|
| 999  | 6-O-acetylscutehenanine A                        | H           | $\alpha$ OAc             | $\beta$ ONic           | $\beta$ OH   | — |                                                             | 72, 1793-1797 |                                                       |
| 1000 | 6-O-(2-carbonyl-3-methylbutanoyl)scutehenanine A | H           | $\alpha$ OM <sub>1</sub> | $\beta$ ONic           | $\beta$ OH   | — |                                                             |               |                                                       |
| 1001 | scutebarbatine B                                 | H           | $\alpha$ ONic            | $\beta$ OBz            | $\beta$ OH   | — |                                                             |               | <i>Phytochemistry</i> , 2006, <b>67</b> , 1326-1330   |
| 1002 | scutelinquanine C                                | H           | $\alpha$ ONic            | $\beta$ Y <sub>8</sub> | $\beta$ OH   | — |                                                             |               | <i>Phytochem. Lett.</i> , 2010, <b>3</b> , 190-193    |
| 1003 | scutebarbatine A                                 | H           | $\alpha$ ONic            | $\beta$ ONic           | $\beta$ OH   | — |                                                             |               | <i>Chin. Chem. Lett.</i> , 1996, <b>7</b> , 333-334   |
| 1004 | scutebarbatine K                                 | H           | $\alpha$ ONic            | $\beta$ OAc            | $\beta$ OH   | — |                                                             |               | <i>Chem. Pharm. Bull.</i> , 2008, <b>56</b> , 207-209 |
| 1005 | scutebarbatine L                                 | H           | $\alpha$ ONic            | $\beta$ Y <sub>4</sub> | $\beta$ OH   | — |                                                             |               |                                                       |
| 1006 | 2-carbonylscutebarbatine A                       | =O          | $\alpha$ ONic            | $\beta$ ONic           | $\beta$ OH   | — |                                                             |               | <i>Planta Med.</i> , 2007, <b>73</b> , 1217-1220      |
| 1007 | 6-O-nicotinoylbarbatin A                         | H           | $\alpha$ ONic            | $\beta$ OH             | $\beta$ OH   | — |                                                             |               |                                                       |
| 1008 | 8-O-nicotinoylbarbatin A                         | H           | $\alpha$ OH              | $\beta$ OH             | $\beta$ ONic | — |                                                             |               |                                                       |
| 1009 | scutebarbatine C                                 | —           | —                        | —                      | —            | — |                                                             |               | <i>Chem. Pharm. Bull.</i> , 2006, <b>54</b> , 869-872 |
| 1010 | scutebarbatine D                                 | $\beta$ OH  | $\alpha$ ONic            | $\beta$ OBz            | —            | — |                                                             |               |                                                       |
| 1011 | scutebarbatine E                                 | =O          | $\alpha$ ONic            | $\beta$ OBz            | —            | — | <i>J. Asian Nat. Prod. Res.</i> , 2009, <b>11</b> , 451-456 |               |                                                       |
| 1012 | scutebarbatine O                                 | $\alpha$ OH | $\beta$ ONic             | $\alpha$ ONic          | —            | — |                                                             |               |                                                       |

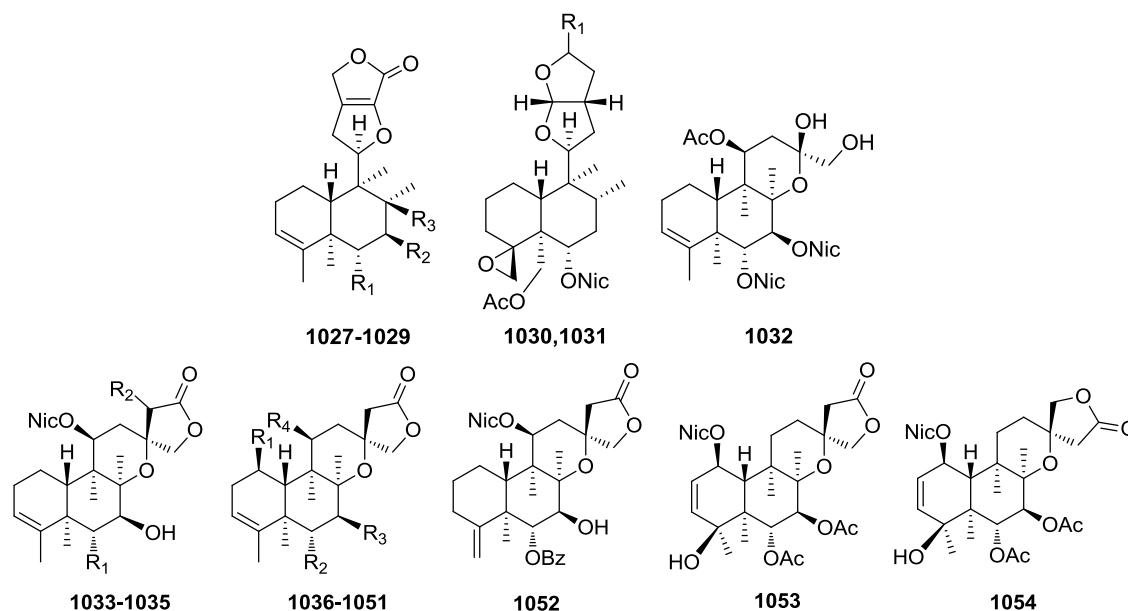

|      |                                | R1           | R2   | R3 | R4 | R5 |                            |                                                         |
|------|--------------------------------|--------------|------|----|----|----|----------------------------|---------------------------------------------------------|
| 1027 | scutehenanine D                | OBz          | ONic | OH | —  | —  | <i>Scutellaria barbata</i> | <i>J. Nat. Prod.</i> , 2009, <b>72</b> , 1793-1797      |
| 1028 | scutebarbatine H               | ONic         | OH   | OH | —  | —  |                            | <i>Chem. Pharm. Bull.</i> , 2007, <b>55</b> , 1218-1221 |
| 1029 | 7-O-nicotinoylscutebarbatine H | ONic         | ONic | OH | —  | —  |                            | <i>Chem. Pharm. Bull.</i> , 2008, <b>56</b> , 207-209   |
| 1030 | scutebarbatine I               | $\beta$ OEt  | —    | —  | —  | —  |                            | <i>Phytochem. Lett.</i> , 2010, <b>3</b> , 190-193      |
| 1031 | scutebarbatine J               | $\alpha$ OEt | —    | —  | —  | —  |                            |                                                         |
| 1032 | scutelinquanine B              | —            | —    | —  | —  | —  |                            |                                                         |
| 1033 | scutelinquanine A              | OAc          | H    | —  | —  | —  |                            |                                                         |

|      |                                                                 |      |      |      |      |   |                                                                                                                                                                                                                                                                                                                                                                                                                                                                                                                                                                                                                                                            |
|------|-----------------------------------------------------------------|------|------|------|------|---|------------------------------------------------------------------------------------------------------------------------------------------------------------------------------------------------------------------------------------------------------------------------------------------------------------------------------------------------------------------------------------------------------------------------------------------------------------------------------------------------------------------------------------------------------------------------------------------------------------------------------------------------------------|
| 1034 | scutehenanine H                                                 | OBz  | OH   | —    | —    | — | <i>Fitoterapia</i> , 2010, <b>81</b> , 737-741<br><i>J. Asian Nat. Prod. Res.</i> , 2010, <b>12</b> , 859-864<br><i>J. Nat. Prod.</i> , 2009, <b>72</b> , 1793-1797<br><i>Chem. Pharm. Bull.</i> , 2006, <b>54</b> , 869-872<br><br><i>Chem. Pharm. Bull.</i> , 2007, <b>55</b> , 1218-1221<br><br><i>J. Asian Nat. Prod. Res.</i> , 2009, <b>11</b> , 451-456<br><br><i>J. Nat. Prod.</i> , 2010, <b>73</b> , 233-236<br><i>Chem. Pharm. Bull.</i> , 2010, <b>58</b> , 1267-1270<br><br><i>Eur. J. Org. Chem.</i> , 2009, 5810-5815<br><br><i>J. Nat. Prod.</i> , 2009, <b>72</b> , 1793-1797<br><br><i>Helv. Chim. Acta.</i> , 2011, <b>94</b> , 643-649 |
| 1035 | scutelinquanine D                                               | OH   | OH   | —    | —    | — |                                                                                                                                                                                                                                                                                                                                                                                                                                                                                                                                                                                                                                                            |
| 1036 | scutehenanine B* → scutebarbatine W (1047)                      | H    | OBz  | OH   | ONic |   |                                                                                                                                                                                                                                                                                                                                                                                                                                                                                                                                                                                                                                                            |
| 1037 | scutebarbatine F* → scutebata F (1045) = barbatine C (1048)     | H    | ONic | OAc  | OAc  |   |                                                                                                                                                                                                                                                                                                                                                                                                                                                                                                                                                                                                                                                            |
| 1038 | scutebarbatine G* → 1039                                        | H    | OH   | OH   | ONic |   |                                                                                                                                                                                                                                                                                                                                                                                                                                                                                                                                                                                                                                                            |
| 1039 | —                                                               | ONic | OH   | OH   | H    |   |                                                                                                                                                                                                                                                                                                                                                                                                                                                                                                                                                                                                                                                            |
| 1040 | 6,7-di-O-nicotinoylscutebarbatine G* → 1041                     | H    | ONic | ONic | ONic |   |                                                                                                                                                                                                                                                                                                                                                                                                                                                                                                                                                                                                                                                            |
| 1041 |                                                                 | ONic | ONic | ONic | H    |   |                                                                                                                                                                                                                                                                                                                                                                                                                                                                                                                                                                                                                                                            |
| 1042 | 6-O-nicotinoyl-7-O-acetylscutebarbatine G* → barbatine D (1049) | H    | ONic | OAc  | ONic |   |                                                                                                                                                                                                                                                                                                                                                                                                                                                                                                                                                                                                                                                            |
| 1043 | 6-O-nicotinoylscutebarbatine G* → 1044                          | H    | ONic | OH   | ONic |   |                                                                                                                                                                                                                                                                                                                                                                                                                                                                                                                                                                                                                                                            |
| 1044 |                                                                 | ONic | ONic | OH   | H    | — |                                                                                                                                                                                                                                                                                                                                                                                                                                                                                                                                                                                                                                                            |
| 1045 | scutebata F = barbatine C (1048)                                | ONic | OAc  | OAc  | H    | — |                                                                                                                                                                                                                                                                                                                                                                                                                                                                                                                                                                                                                                                            |
| 1046 | scutebata G                                                     | OBz  | ONic | OBz  | H    | — |                                                                                                                                                                                                                                                                                                                                                                                                                                                                                                                                                                                                                                                            |
| 1047 | scutebarbatine W                                                | OBz  | ONic | OH   | H    | — |                                                                                                                                                                                                                                                                                                                                                                                                                                                                                                                                                                                                                                                            |
| 1048 | barbatine C = scutebata F (1045)                                | ONic | OAc  | OAc  | H    | — |                                                                                                                                                                                                                                                                                                                                                                                                                                                                                                                                                                                                                                                            |
| 1049 | barbatine D                                                     | ONic | ONic | OAc  | H    | — |                                                                                                                                                                                                                                                                                                                                                                                                                                                                                                                                                                                                                                                            |
| 1050 | barbatine A                                                     | H    | ONic | OAc  | ONic | — |                                                                                                                                                                                                                                                                                                                                                                                                                                                                                                                                                                                                                                                            |
| 1051 | barbatine B                                                     | H    | ONic | ONic | ONic | — |                                                                                                                                                                                                                                                                                                                                                                                                                                                                                                                                                                                                                                                            |
| 1052 | scutehenanine C                                                 |      |      |      |      |   |                                                                                                                                                                                                                                                                                                                                                                                                                                                                                                                                                                                                                                                            |
| 1053 | barbatellarine C                                                |      |      |      |      |   |                                                                                                                                                                                                                                                                                                                                                                                                                                                                                                                                                                                                                                                            |
| 1054 | barbatellarine D                                                |      |      |      |      |   |                                                                                                                                                                                                                                                                                                                                                                                                                                                                                                                                                                                                                                                            |

**SINDORA Genus**

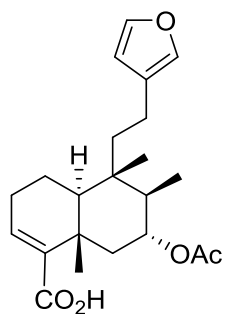

**402**

|            |                                                                 |                          |                                                         |
|------------|-----------------------------------------------------------------|--------------------------|---------------------------------------------------------|
| <b>402</b> | (+)-7β-acetoxy-15,16-epoxy-3,13(16),14-clerodatrien-18-oic acid | <i>Sindora sumatrana</i> | <i>Chem. Pharm. Bull.</i> , 1994, <b>42</b> , 1202-1207 |
|------------|-----------------------------------------------------------------|--------------------------|---------------------------------------------------------|

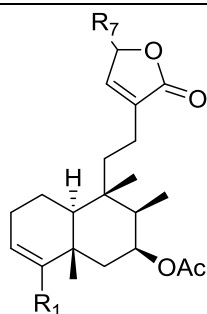

**568-570**

|            |                                                              | R1                | R7 |                          |                                                         |
|------------|--------------------------------------------------------------|-------------------|----|--------------------------|---------------------------------------------------------|
| <b>568</b> | (+)-7β-acetoxy-18-oxo-3,13-clerodadien-16,15-olide           | CHO               | H  | <i>Sindora sumatrana</i> | <i>Chem. Pharm. Bull.</i> , 1994, <b>42</b> , 1202-1207 |
| <b>569</b> | (+)-7β-acetoxy-3,13-clerodadien-16,15-olid-18-oic acid       | CO <sub>2</sub> H | H  |                          |                                                         |
| <b>570</b> | (+)-7β-acetoxy-16-hydroxy-3,13-clerodadien-16,15-olid-18-oic | CO <sub>2</sub> H | OH |                          |                                                         |

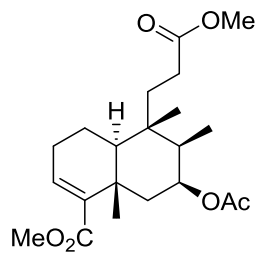

**1085**

|             |                                                         |                          |                                                         |
|-------------|---------------------------------------------------------|--------------------------|---------------------------------------------------------|
| <b>1085</b> | (+)-7β-acetoxy-14,15,16-trinor-3-clerodene-13,18-dioate | <i>Sindora sumatrana</i> | <i>Chem. Pharm. Bull.</i> , 1994, <b>42</b> , 1202-1207 |
|-------------|---------------------------------------------------------|--------------------------|---------------------------------------------------------|

**SOLIDAGO Genus**

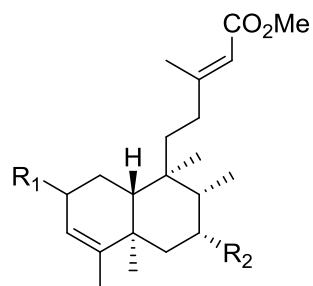

178 R<sub>1</sub> = =O, R<sub>2</sub> = OAc  
 179 R<sub>1</sub> = β-OH, R<sub>2</sub> = OAc  
 180 R<sub>1</sub> = α-OH, R<sub>2</sub> = H  
 179 R<sub>1</sub> = β-OH, R<sub>2</sub> = H

|     |   |                           |                                                   |
|-----|---|---------------------------|---------------------------------------------------|
| 178 | — | <i>Solidago altissima</i> | <i>Phytochemistry</i> , 1999, <b>52</b> , 487-493 |
| 179 | — |                           |                                                   |
| 180 | — |                           |                                                   |
| 181 | — |                           |                                                   |

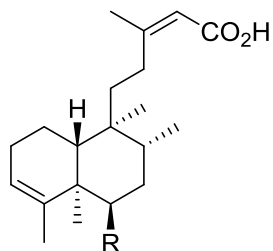

200 R = OTig  
 201 R = OAng

|     |                 |                            |                                                       |
|-----|-----------------|----------------------------|-------------------------------------------------------|
| 200 | solidagocanin A | <i>Solidago canadensis</i> | <i>Helv. Chim. Acta</i> , 2012, <b>95</b> , 1121-1125 |
| 201 | solidagocanin B |                            |                                                       |

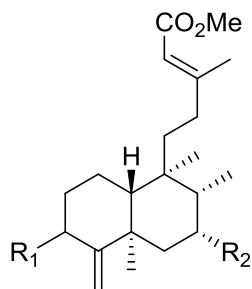

282 R<sub>1</sub> = α-OH, R<sub>2</sub> = OAc  
 283 R<sub>1</sub> = β-OH, R<sub>2</sub> = OAc  
 282 R<sub>1</sub> = =O, R<sub>2</sub> = H

|     |   |                           |                                                   |
|-----|---|---------------------------|---------------------------------------------------|
| 282 | — | <i>Solidago altissima</i> | <i>Phytochemistry</i> , 1999, <b>52</b> , 487-493 |
| 283 | — |                           |                                                   |
| 284 | — |                           |                                                   |

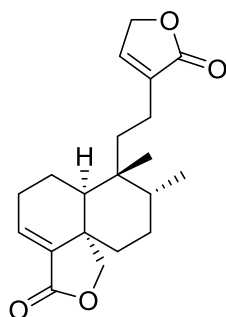

455

|     |                                            |                           |                                                   |
|-----|--------------------------------------------|---------------------------|---------------------------------------------------|
| 455 | cleroda-3,13(14)-dien-16,15:18,19-dioidide | <i>Solidago virgaurea</i> | <i>Phytochemistry</i> , 2010, <b>71</b> , 104–109 |
|-----|--------------------------------------------|---------------------------|---------------------------------------------------|

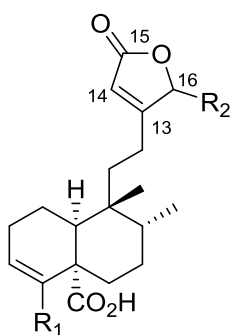

558-559

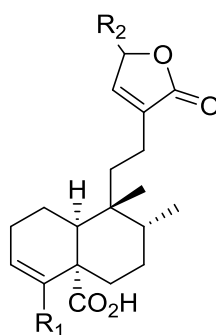

560-564

|     |                   | R1                   | R2  |                           |                                                   |
|-----|-------------------|----------------------|-----|---------------------------|---------------------------------------------------|
| 558 | solidagoic acid H | Me                   | OH  | <i>Solidago virgaurea</i> | <i>Phytochemistry</i> , 2010, <b>71</b> , 104–109 |
| 559 | solidagoic acid I | CH <sub>2</sub> OAng | OH  |                           |                                                   |
| 560 | solidagoic acid C | Me                   | H   |                           |                                                   |
| 561 | solidagoic acid D | CH <sub>2</sub> OAng | H   |                           |                                                   |
| 562 | solidagoic acid E | Me                   | OH  |                           |                                                   |
| 563 | solidagoic acid F | CH <sub>2</sub> OAng | OH  |                           |                                                   |
| 564 | solidagoic acid G | Me                   | OMe |                           |                                                   |

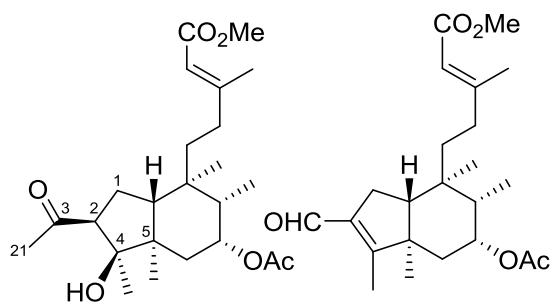

1146

1147

|      |   |                           |                                                   |
|------|---|---------------------------|---------------------------------------------------|
| 1146 | — | <i>Solidago altissima</i> | <i>Phytochemistry</i> , 1999, <b>52</b> , 487-493 |
| 1147 | — |                           |                                                   |

**STACHYS Genus**

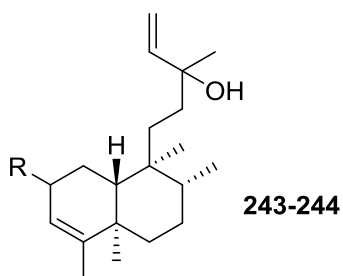

|            |                 |             |                      |                                                     |
|------------|-----------------|-------------|----------------------|-----------------------------------------------------|
| <b>243</b> | roseostachenol  | $\alpha$ OH | <i>Stachys rosea</i> | <i>Phytochemistry</i> , 1994, <b>37</b> , 501-503   |
| <b>244</b> | roseostachenone | =O          |                      | <i>Phytochemistry</i> , 1992, <b>31</b> , 3147-3149 |

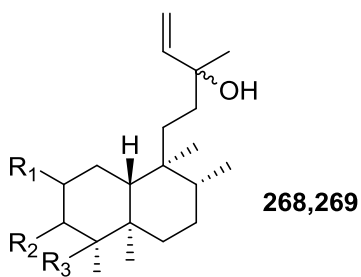

|            |               | R1          | R2          | R3         |                      |                                                     |
|------------|---------------|-------------|-------------|------------|----------------------|-----------------------------------------------------|
| <b>268</b> | roseotetrol   | $\alpha$ OH | $\alpha$ OH | $\beta$ OH | <i>Stachys rosea</i> | <i>Phytochemistry</i> , 1994, <b>37</b> , 501-503   |
| <b>269</b> | roseostachone | H           | =O          | H          |                      | <i>Phytochemistry</i> , 1992, <b>31</b> , 3147-3149 |

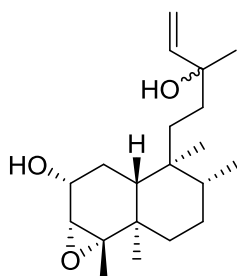

**294**

|            |                                             |                          |                                                |
|------------|---------------------------------------------|--------------------------|------------------------------------------------|
| <b>294</b> | 3 $\alpha$ ,4 $\alpha$ -epoxyroseostachenol | <i>Stachys glutinosa</i> | <i>J. Nat. Prod.</i> , 2015, <b>78</b> , 69-76 |
|------------|---------------------------------------------|--------------------------|------------------------------------------------|

**TEUCRIUM Genus**

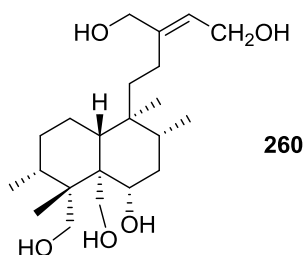

|            |              |                                                   |                                                  |
|------------|--------------|---------------------------------------------------|--------------------------------------------------|
| <b>260</b> | sypirensin B | <i>Teucrium chamaedrys</i> ssp. <i>sypirensis</i> | <i>J. Nat. Prod.</i> , 1996, <b>59</b> , 457-460 |
|------------|--------------|---------------------------------------------------|--------------------------------------------------|

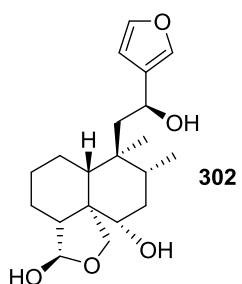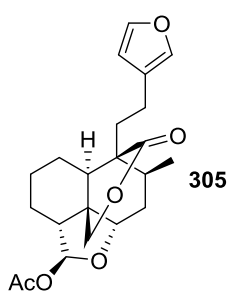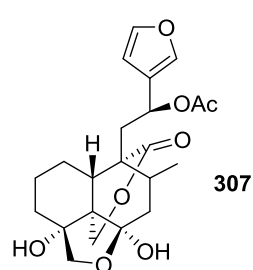

|            |                           |                             |                                                     |
|------------|---------------------------|-----------------------------|-----------------------------------------------------|
| <b>302</b> | teumassilenin B           | <i>Teucrium massiliense</i> | <i>J. Nat. Prod.</i> , 1998, <b>61</b> , 1242-1247  |
| <b>305</b> | teuctomin                 | <i>Teucrium tomentosum</i>  | <i>Nat. Prod. Res.</i> , 2010, <b>24</b> , 7-12     |
| <b>307</b> | 12-O-acetylteugnaphalodin | <i>Teucrium oxylepis</i>    | <i>Phytochemistry</i> , 1991, <b>30</b> , 4079-4082 |

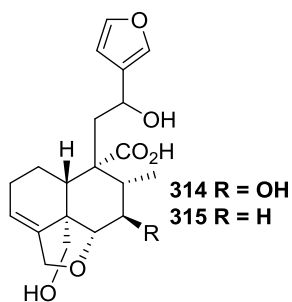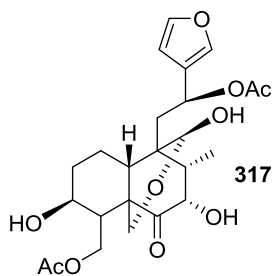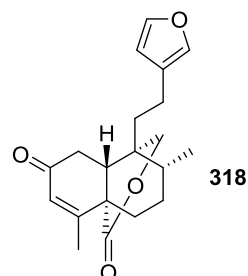

|            |                  |                           |                                                      |
|------------|------------------|---------------------------|------------------------------------------------------|
| <b>314</b> | tepolin A        | <i>Teucrium polium</i>    | <i>Him. Prir. Soedin.</i> , 1992, <b>5</b> , 503-508 |
| <b>315</b> | tepolin B        |                           |                                                      |
| <b>316</b> | difuranofruticol | <i>Teucrium fruticans</i> | <i>Phytochemistry</i> , 2005, <b>66</b> , 2298-2303  |
| <b>317</b> | syrapolin II     | <i>Teucrium polium</i>    | <i>Jordan J. Chem.</i> , 2011, <b>6</b> , 339-345    |



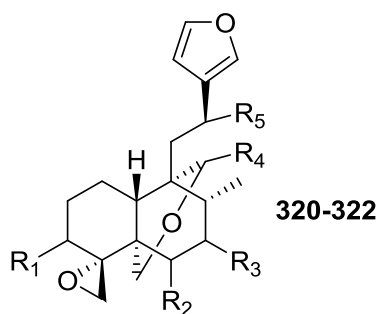

|            |                                                      | R1         | R2          | R3 | R4          | R5          |                          |                                                     |
|------------|------------------------------------------------------|------------|-------------|----|-------------|-------------|--------------------------|-----------------------------------------------------|
| <b>320</b> | 6 $\beta$ -O-acetyl-3 $\beta$ -hydroxy-teucroxylopin | $\beta$ OH | $\beta$ OAc | H  | =O          | OH          | <i>Teucrium yemense</i>  | <i>Phytochemistry</i> , 1995, <b>40</b> , 1737-1741 |
| <b>321</b> | teucroxylopin                                        | H          | $\beta$ OH  | H  | =O          | $\beta$ OAc | <i>Teucrium oxylepis</i> | <i>Phytochemistry</i> , 1991, <b>30</b> , 4079-4082 |
| <b>322</b> | montanin H                                           | H          | $\alpha$ OH | =O | $\alpha$ OH | OAc         | <i>Teucrium montanum</i> | <i>Phytochemistry</i> , 1992, <b>31</b> , 4029-4030 |

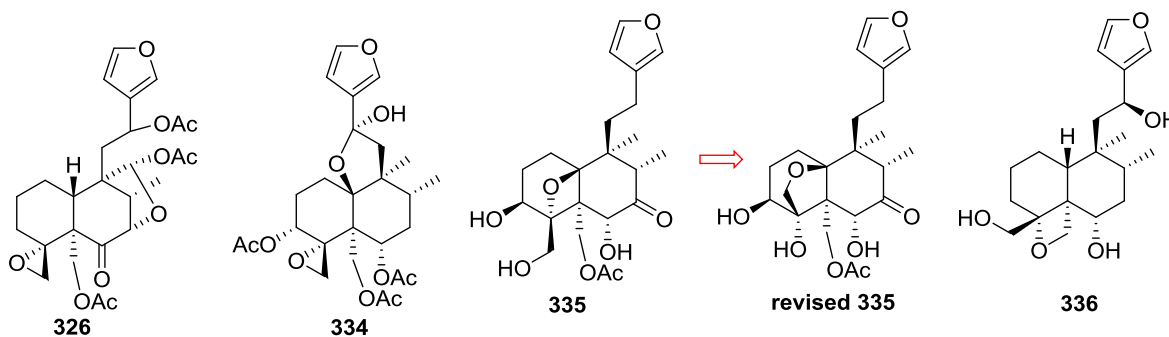

|            |                 |                             |                                                     |
|------------|-----------------|-----------------------------|-----------------------------------------------------|
| <b>326</b> | teucosin B      | <i>Teucrium cossonii</i>    | <i>Phytochemistry</i> , 1992, <b>31</b> , 3957-3960 |
| <b>334</b> | teucrolin A     | <i>Teucrium oliverianum</i> | <i>J. Nat. Prod.</i> , 1993, <b>56</b> , 830-842,   |
| <b>335</b> | teucrolin E     |                             | <i>Phytochemistry</i> , 2002, <b>59</b> , 409-414   |
| <b>336</b> | teumassilenin C | <i>Teucrium massiliense</i> | <i>J. Nat. Prod.</i> , 1998, <b>61</b> , 1242-1247  |

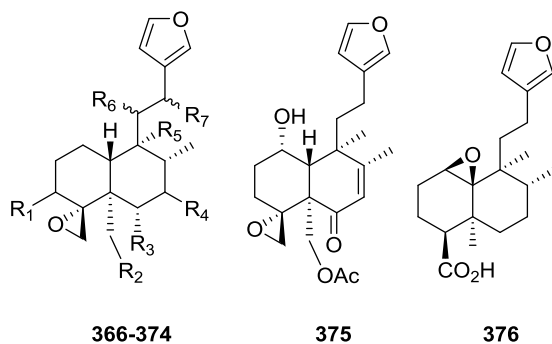

|            |            | R1 | R2  | R3 | R4 | R5                  | R6 | R7  |                          |                                                     |
|------------|------------|----|-----|----|----|---------------------|----|-----|--------------------------|-----------------------------------------------------|
| <b>366</b> | teucosin A | H  | OAc | OH | H  | CH <sub>2</sub> OAc | H  | OAc | <i>Teucrium cossonii</i> | <i>Phytochemistry</i> , 1992, <b>31</b> , 3957-3960 |

|     |                               |             |     |     |             |                     |    |     |                             |                                                     |
|-----|-------------------------------|-------------|-----|-----|-------------|---------------------|----|-----|-----------------------------|-----------------------------------------------------|
| 367 | teugracilin E                 | $\beta$ OAc | OAc | OAc | H           | CH <sub>2</sub> OAc | H  | OAc | <i>Teucrium gracile</i>     | <i>Phytochemistry</i> , 1992, <b>31</b> , 3531-3534 |
| 368 | teugracilin C                 | $\beta$ OH  | OAc | OH  | H           | Me                  | H  | OAc |                             | <i>Phytochemistry</i> , 1991, <b>30</b> , 3693-3697 |
| 369 | teucrolivin D                 | $\beta$ OAc | OAc | OH  | $\beta$ OAc | Me                  | H  | H   | <i>Teucrium oliverianum</i> | <i>Phytochemistry</i> , 1991, <b>30</b> , 1603-1606 |
| 370 | teucrolivin E                 | $\beta$ OAc | OAc | OH  | =O          | Me                  | H  | H   |                             |                                                     |
| 371 | 7 $\beta$ -hydroxyfruticolone | H           | OAc | =O  | $\beta$ OH  | Me                  | H  | H   | <i>Teucrium fruticans</i>   | <i>Phytochemistry</i> , 2004, <b>65</b> , 387-392   |
| 372 | 11-hydroxyfruticolone         | H           | OAc | =O  | H           | Me                  | OH | H   |                             |                                                     |
| 373 | deacetylfruticolone           | H           | OH  | =O  | H           | Me                  | H  | H   |                             |                                                     |
| 374 | deoxyfruticolone              | H           | OAc | =O  | H           | Me                  | H  | H   |                             |                                                     |
| 375 | didehydrofruticolone          | —           | —   | —   | —           | —                   | —  | —   |                             | <i>Phytochemistry</i> , 2005, <b>66</b> , 2298-2303 |

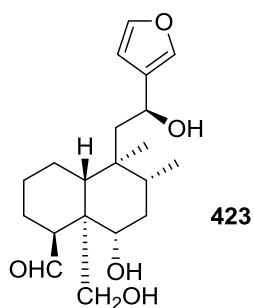

|            |                 |                             |                                                    |
|------------|-----------------|-----------------------------|----------------------------------------------------|
| <b>423</b> | teumassilenin A | <i>Teucrium massiliense</i> | <i>J. Nat. Prod.</i> , 1998, <b>61</b> , 1242-1247 |
|------------|-----------------|-----------------------------|----------------------------------------------------|

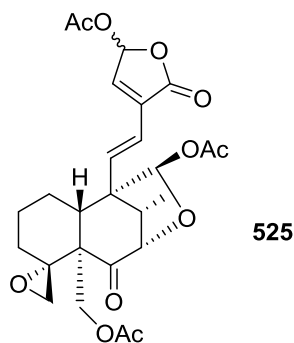

|            |               |                           |                                                   |
|------------|---------------|---------------------------|---------------------------------------------------|
| <b>525</b> | teucrasiolide | <i>Teucrium asiaticum</i> | <i>Phytochemistry</i> , 1997, <b>45</b> , 383-385 |
|------------|---------------|---------------------------|---------------------------------------------------|

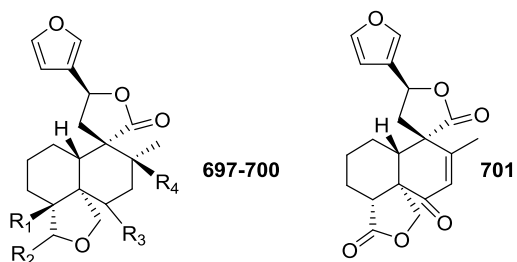

|     |              | R1 | R2          | R3          | R4 |                          |                                                       |
|-----|--------------|----|-------------|-------------|----|--------------------------|-------------------------------------------------------|
| 697 | teupolin XII | H  | $\beta$ OMe | $\beta$ OH  | H  | <i>Teucrium polium</i>   | <i>Phytochemistry</i> , 2011, <b>72</b> , 2037-2044   |
| 698 | teucvisin A  | OH | =O          | $\alpha$ OH | H  | <i>Teucrium viscidum</i> | <i>Chem. Pharm. Bull.</i> , 2014, <b>62</b> , 472-476 |
| 699 | teuperninB   | H  | =O          | =O          | OH | <i>Teucrium perny</i>    | <i>Phytochemistry</i> , 1991, <b>30</b> , 1963-1966   |
| 700 | teuperninC   | H  | =O          | $\beta$ OH  | OH |                          |                                                       |
| 701 | teupernin A  | —  | —           | —           | —  |                          |                                                       |

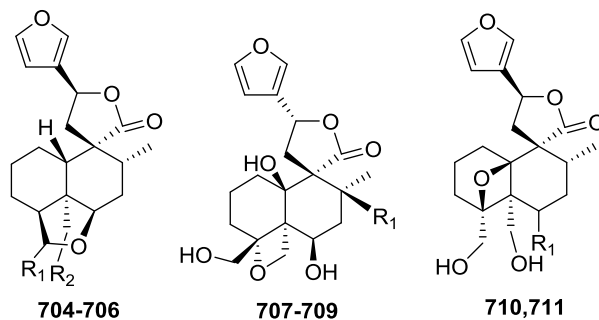

|     |                            | R1           | R2  |                             |                                                       |
|-----|----------------------------|--------------|-----|-----------------------------|-------------------------------------------------------|
| 704 | teupolin X                 | $\alpha$ OH  | OH  | <i>Teucrium polium</i>      | <i>Phytochemistry</i> , 2011, <b>72</b> , 2037-2044   |
| 705 | teupolin XI                | $\alpha$ OMe | OH  |                             |                                                       |
| 706 | teucvisin B                | =O           | OAc | <i>Teucrium viscidum</i>    | <i>Chem. Pharm. Bull.</i> , 2014, <b>62</b> , 472-476 |
| 707 | 12- <i>epi</i> -montanin D | H            | —   | <i>Teucrium maghrebinum</i> | <i>J. Nat. Prod.</i> , 2000, <b>63</b> , 1029-1031    |
| 708 | teusandrin C               | OH           | —   | <i>Teucrium sandrasicum</i> | <i>Phytochemistry</i> , 1997, <b>45</b> , 1653-1662   |
| 709 | teusandrin D               | H            | —   |                             |                                                       |
| 710 | teusandrin E               | =O           | —   |                             |                                                       |
| 711 | teusandrin F               | $\alpha$ OH  | —   |                             |                                                       |

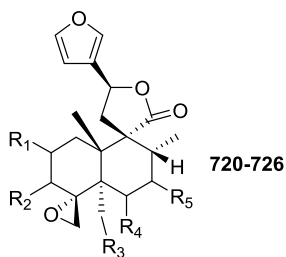

|     |           | R1 | R2 | R3  | R4 | R5 |                             |                                                     |
|-----|-----------|----|----|-----|----|----|-----------------------------|-----------------------------------------------------|
| 720 | teumassin | OH | H  | OAc | =O | H  | <i>Teucrium massiliense</i> | <i>Phytochemistry</i> , 1992, <b>31</b> , 4366-4367 |

|     |                                   |   |             |     |             |            |                             |                                                     |
|-----|-----------------------------------|---|-------------|-----|-------------|------------|-----------------------------|-----------------------------------------------------|
| 721 | 4 $\alpha$ ,18-epoxy-tafricanin A | H | =O          | OAc | =O          | H          | <i>Teucrium pestalozzae</i> | <i>Phytochemistry</i> , 1990, <b>29</b> , 988-989   |
| 722 | 20-oxo-teuflavin                  | H | =O          | OAc | $\beta$ OH  | H          |                             |                                                     |
| 723 | teutridin                         | H | =O          | OAc | =O          | $\beta$ OH | <i>Teucrium trifidum</i>    | <i>Phytochemistry</i> , 1994, <b>36</b> , 1549-1550 |
| 724 | 3-O-deacetylteugracilin A         | H | $\beta$ OH  | OAc | $\beta$ OH  | H          | <i>Teucrium gracile</i>     | <i>Phytochemistry</i> , 1991, <b>30</b> , 3693-3697 |
| 725 | teugracilin A                     | H | $\beta$ OAc | OAc | $\beta$ OH  | H          |                             |                                                     |
| 726 | teugracilin B                     | H | $\beta$ OH  | OAc | $\alpha$ OH | H          |                             |                                                     |

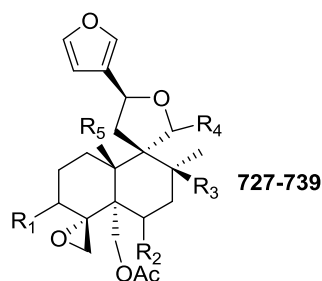

|     |                                    | R1          | R2           | R3 | R4           | R5 |                             |                                                     |
|-----|------------------------------------|-------------|--------------|----|--------------|----|-----------------------------|-----------------------------------------------------|
| 727 | teusandrin A                       | H           | $\alpha$ OAc | OH | =O           | OH | <i>Teucrium sandrasicum</i> | <i>Phytochemistry</i> , 1997, <b>45</b> , 1653-1662 |
| 728 | teusandrin B                       | H           | $\alpha$ OH  | OH | =O           | OH |                             |                                                     |
| 729 | 3-deacetylteumicropodine           | $\beta$ OAc | $\alpha$ OH  | H  | =O           | H  | <i>Teucrium polium</i>      | <i>Phytochemistry</i> , 1994, <b>37</b> , 1663-1666 |
| 730 | 3,20-bis-deacetylteupyreinidine    | $\beta$ OH  | $\alpha$ OAc | H  | $\alpha$ OH  | H  |                             |                                                     |
| 731 | 6,20-bis-deacetylteupyreinidine    | $\beta$ OAc | $\alpha$ OH  | H  | $\alpha$ OH  | H  |                             |                                                     |
| 732 | 3,6,20-tri-deacetyl-teupyreinidine | $\beta$ OH  | $\alpha$ OH  | H  | $\alpha$ OH  | H  |                             |                                                     |
| 733 | 10-hydroxyteucjaponin B            | H           | $\beta$ OH   | H  | =O           | OH | <i>Teucrium fruticans</i>   | <i>Phytochemistry</i> , 2005, <b>66</b> , 2298-2303 |
| 734 | 6-acetyl-10-hydroxy-teucjaponin B  | H           | $\beta$ OAc  | H  | =O           | OH |                             |                                                     |
| 735 | 6-acetylteucjaponin B              | H           | $\beta$ OAc  | H  | =O           | H  |                             |                                                     |
| 736 | 12- <i>epi</i> -teupyreinin        | $\beta$ OAc | $\alpha$ OAc | H  | =O           | H  | <i>Teucrium nudicaule</i>   | <i>Nat. Prod. Res.</i> , 1996, <b>8</b> , 189-197   |
| 737 | teubutilin B                       | H           | $\alpha$ OAc | H  | $\beta$ OAc  | H  | <i>Teucrium abutiloides</i> | <i>Phytochemistry</i> , 1990, <b>29</b> , 579-584   |
| 738 | teucrasiatin                       | H           | =O           | H  | $\alpha$ OH  | H  | <i>Teucrium asiaticum</i>   | <i>Phytochemistry</i> , 1996, <b>43</b> , 435-438   |
| 739 | teugracilin D                      | $\beta$ OH  | $\alpha$ OH  | H  | $\alpha$ OAc | H  | <i>Teucrium gracile</i>     | <i>Phytochemistry</i> , 1992, <b>31</b> , 3531-3534 |

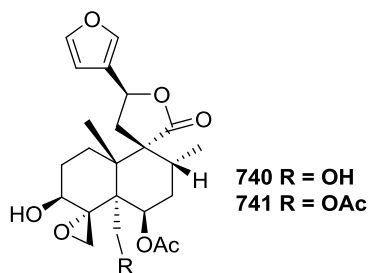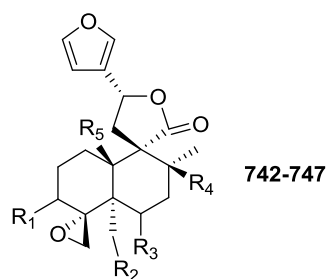

|     |                               | R1          | R2  | R3           | R4 | R5         |                             |                                                     |
|-----|-------------------------------|-------------|-----|--------------|----|------------|-----------------------------|-----------------------------------------------------|
| 740 | teucrymin                     | --          | --  | --           | -- | --         | <i>Teucrium yemense</i>     | <i>Phytochemistry</i> , 1995, <b>40</b> , 1737-1741 |
| 741 | 19- <i>O</i> -acetylteucrymin | --          | --  | --           | -- | --         |                             |                                                     |
| 742 | teucryminone                  | $\beta$ OAc | OAc | =O           | H  | $\beta$ H  |                             |                                                     |
| 743 | 12- <i>epi</i> -teucjaponin A | H           | OAc | $\beta$ OH   | H  | $\beta$ H  | <i>Teucrium maghrebinum</i> | <i>J. Nat. Prod.</i> , 2000, <b>63</b> , 1029-1031  |
| 744 | sandrasin A                   | H           | OAc | $\alpha$ OAc | OH | $\beta$ OH | <i>Teucrium sandrasicum</i> | <i>Phytochemistry</i> , 1996, <b>42</b> , 775-778   |
| 745 | 6-deacetylsandrasin A         | H           | OAc | $\alpha$ OH  | OH | $\beta$ OH |                             |                                                     |
| 746 | teubrevin C                   | $\beta$ OAc | OAc | =O           | H  | H          | <i>Teucrium brevifolium</i> | <i>Tetrahedron</i> , 1995, <b>51</b> , 837-848      |
| 747 | teubrevin D                   | $\beta$ OAc | OAc | =O           | OH | OH         |                             |                                                     |

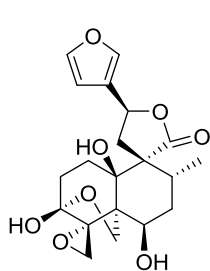

748

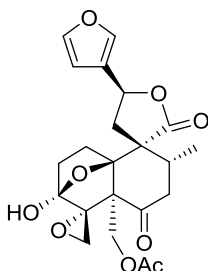

749

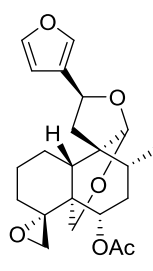

750

|     |               |                             |                                                     |
|-----|---------------|-----------------------------|-----------------------------------------------------|
| 748 | teupestalin A | <i>Teucrium pestalozzae</i> | <i>Phytochemistry</i> , 1990, <b>29</b> , 2229-2233 |
| 749 | teupestalin B |                             |                                                     |
| 750 | teubutilin A  | <i>Teucrium abutiloides</i> | <i>Phytochemistry</i> , 1990, <b>29</b> , 579-584   |

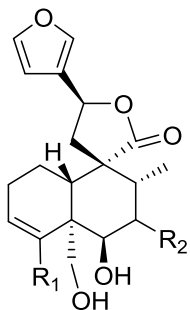

776,777

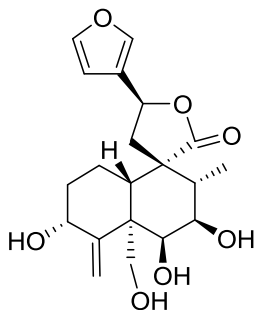

778

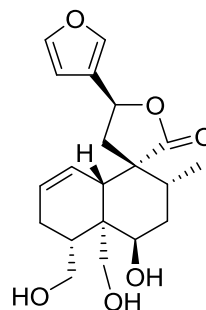

780

|                  |             |                    |            |                        |                                                   |
|------------------|-------------|--------------------|------------|------------------------|---------------------------------------------------|
| 776 <sup>a</sup> | teupernin D | CO <sub>2</sub> Me | H          | <i>Teucrium pernyi</i> | <i>Phytochemistry</i> , 1993, <b>33</b> , 716-717 |
| 777              | teulolin A  | CH <sub>2</sub> OH | $\beta$ OH | <i>Teucrium polium</i> | <i>Phytochemistry</i> , 1999, <b>51</b> , 921-925 |



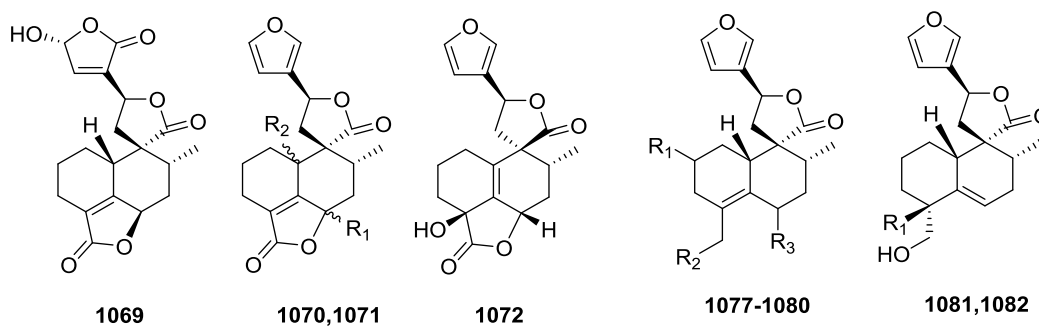

|             |                   |             |             |             |                                                   |                                                       |
|-------------|-------------------|-------------|-------------|-------------|---------------------------------------------------|-------------------------------------------------------|
| <b>1069</b> | teuponin          | —           | —           | —           | <i>Teucrium japonicum.</i>                        | <i>Phytochemistry</i> , 1991, <b>30</b> , 4175-4177   |
| <b>1070</b> | teucvisin C       | $\beta$ OH  | $\beta$ H   |             | <i>Teucrium viscidum</i>                          | <i>Chem. Pharm. Bull.</i> , 2014, <b>62</b> , 472-476 |
| <b>1071</b> | teucvisin D       | $\alpha$ H  | $\alpha$ OH |             |                                                   |                                                       |
| <b>1072</b> | teucvisin E       | OH          | —           | —           |                                                   |                                                       |
| <b>1077</b> | teucorymbin       | H           | OAc         | H           | <i>Teucrium corymbosum</i>                        | <i>Phytochemistry</i> , 1995, <b>40</b> , 1481-1483   |
| <b>1078</b> | sypirensin A      | $\alpha$ OH | OH          | $\alpha$ OH | <i>Teucrium chamaedrys</i> ssp. <i>sypirensis</i> | <i>J. Nat. Prod.</i> , 1996, <b>59</b> , 457-460      |
| <b>1079</b> | teupolin IX       | H           | OH          | $\beta$ OMe | <i>Teucrium polium</i>                            | <i>Phytochemistry</i> , 2011, <b>72</b> , 2037-2044   |
| <b>1080</b> | 12-epi-montanin B | H           | OH          | $\beta$ OH  | <i>Teucrium maghrebinum</i>                       | <i>J. Nat. Prod.</i> , 2000, <b>63</b> , 1029-1031    |
| <b>1081</b> | teupolin VIII     | OH          | —           | —           | <i>Teucrium polium</i>                            | <i>Phytochemistry</i> , 2011, <b>72</b> , 2037-2044   |
| <b>1082</b> | teupolin VII      | OMe         | —           | —           |                                                   |                                                       |

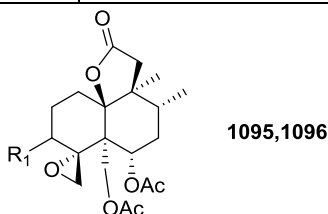

|             |               |              |                             |                                                     |
|-------------|---------------|--------------|-----------------------------|-----------------------------------------------------|
| <b>1095</b> | teucrolin D   | $\alpha$ OAc | <i>Teucrium oliverianum</i> | <i>J. Nat. Prod.</i> , 1993, <b>56</b> , 830-842    |
| <b>1096</b> | teucrolivin F | =O           |                             | <i>Phytochemistry</i> , 1991, <b>30</b> , 1603-1606 |

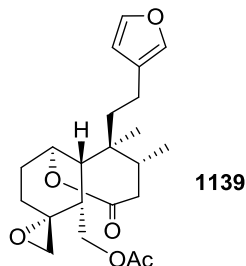

|             |             |                           |                                                     |
|-------------|-------------|---------------------------|-----------------------------------------------------|
| <b>1139</b> | fruticolide | <i>Teucrium fruticans</i> | <i>Phytochemistry</i> , 1992, <b>31</b> , 3531-3534 |
|-------------|-------------|---------------------------|-----------------------------------------------------|

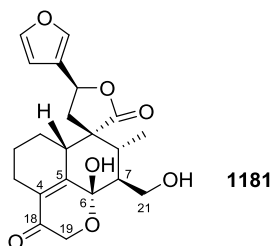

|             |            |                           |                                                  |
|-------------|------------|---------------------------|--------------------------------------------------|
| <b>1181</b> | teubetonin | <i>Teucrium betonicum</i> | <i>Tetrahedron</i> , 1995, <b>51</b> , 2363-2368 |
|-------------|------------|---------------------------|--------------------------------------------------|

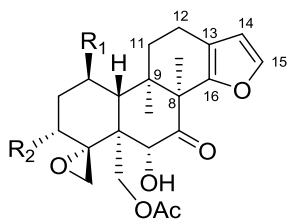

**1201,1202**

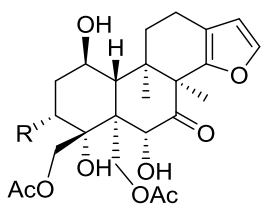

**1203,1204**

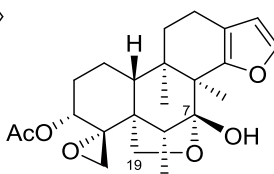

**1205**

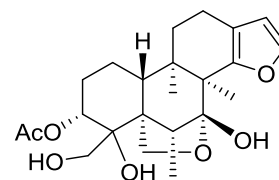

**1206**

|             |                     |     |     |                                                    |                                                    |
|-------------|---------------------|-----|-----|----------------------------------------------------|----------------------------------------------------|
| <b>1201</b> | alysine A           | OH  | OAc | <i>Teucrium alyssifolium</i>                       | <i>Tetrahedron</i> , 1995, <b>51</b> , 11793-11800 |
| <b>1202</b> | alysine C           | H   | OH  |                                                    |                                                    |
| <b>1203</b> | alysine B           | OAc | —   |                                                    |                                                    |
| <b>1204</b> | 3-deacetylalysine B | OH  | —   |                                                    |                                                    |
| <b>1205</b> | alysine D           | —   | —   | <i>J. Nat. Prod.</i> , 1997, <b>60</b> , 1045-1047 |                                                    |
| <b>1206</b> | alysine E           | —   | —   |                                                    |                                                    |

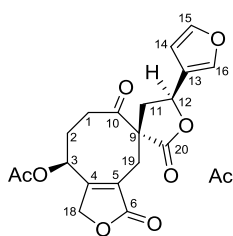

**1217**

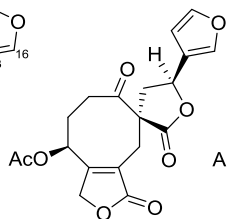

**1218**

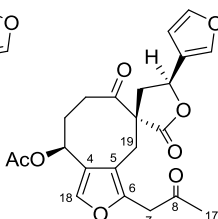

**1219**

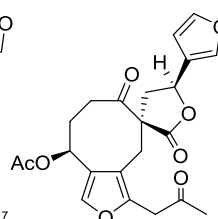

**1220**

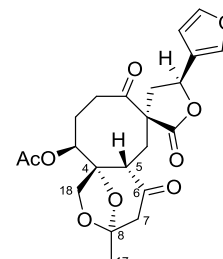

**1221**

|             |             |                             |                                                |
|-------------|-------------|-----------------------------|------------------------------------------------|
| <b>1217</b> | teubrevin E | <i>Teucrium brevifolium</i> | <i>Tetrahedron</i> , 1995, <b>51</b> , 837-848 |
| <b>1218</b> | teubrevin F |                             |                                                |
| <b>1219</b> | teubrevin G |                             |                                                |
| <b>1220</b> | teubrevin H |                             |                                                |
| <b>1221</b> | teubrevin I |                             |                                                |



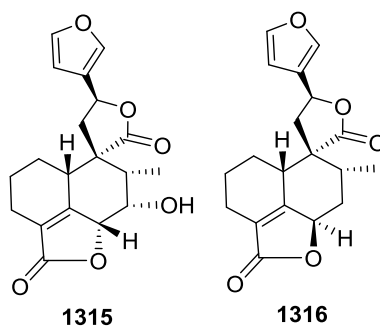

|      |                 |                            |                                                                     |
|------|-----------------|----------------------------|---------------------------------------------------------------------|
| 1315 | teucrin A       | <i>Teucrium chamaedrys</i> | <i>Basic Clin. Pharmacol. Toxicol.</i> , 2011, <b>109</b> , 521-526 |
| 1316 | teuchamaedryn A |                            |                                                                     |

**THYSANANTHUS Genus**

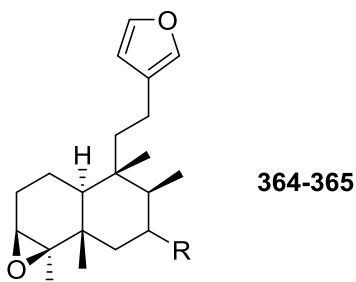

|     |                                                            |    |                                    |                                                         |
|-----|------------------------------------------------------------|----|------------------------------------|---------------------------------------------------------|
| 364 | 3 $\beta$ ,4 $\beta$ :15,16-diepoxy-13(16),14-clerodadiene | H  | <i>Thysananthus spathulistipus</i> | <i>Chem. Pharm. Bull.</i> , 2006, <b>54</b> , 1046-1049 |
| 365 | thysaspathone                                              | =O |                                    |                                                         |

**TINOSPORA Genus**

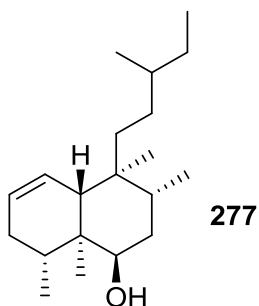

|     |                     |                             |                                                    |
|-----|---------------------|-----------------------------|----------------------------------------------------|
| 277 | tinosporaclerodanol | <i>Tinospora cordifolia</i> | <i>Nat. Prod. Res.</i> , 2010, <b>24</b> , 926-934 |
|-----|---------------------|-----------------------------|----------------------------------------------------|

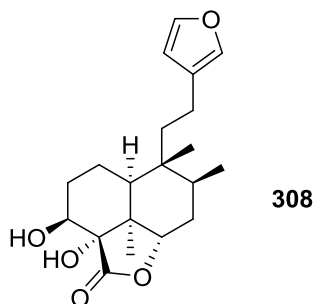

|            |                                                                                                                                                                                        |                          |                                                  |
|------------|----------------------------------------------------------------------------------------------------------------------------------------------------------------------------------------|--------------------------|--------------------------------------------------|
| <b>308</b> | (2a $\beta$ ,3 $\alpha$ ,5a $\beta$ ,6 $\beta$ ,7R,8 $\alpha$ )-6-[2-(3-furanyl)ethyl]-2a,3,4,5,5a,6,7,8,8a,8b-decahydro-2a,3-dihydroxy-6,7,8b-trimethyl-2H-naphtho[1,8-bc]furan-2-one | <i>Tinospora rumphii</i> | <i>J. Nat. Prod.</i> , 2000, <b>63</b> , 509-511 |
|------------|----------------------------------------------------------------------------------------------------------------------------------------------------------------------------------------|--------------------------|--------------------------------------------------|

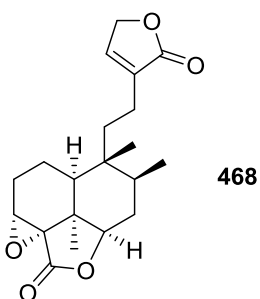

|            |            |                         |                                                         |
|------------|------------|-------------------------|---------------------------------------------------------|
| <b>468</b> | crispene E | <i>Tinospora crispa</i> | <i>Org. Biomol. Chem.</i> , 2015, <b>13</b> , 3882-3886 |
|------------|------------|-------------------------|---------------------------------------------------------|

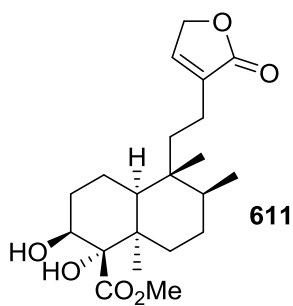

|            |                                                                                                                                                                              |                          |                                                         |
|------------|------------------------------------------------------------------------------------------------------------------------------------------------------------------------------|--------------------------|---------------------------------------------------------|
| <b>611</b> | methyl(1 $\alpha$ ,4 $\alpha$ a,5 $\alpha$ ,6 $\beta$ ,8 $\alpha$ )-5-[2-(3-furan-3-ene-2-one)ethyl]-1,2,3,4,4a,5,6,7,8,8a-decahydro-1,2-dihydroxy-1-naphthalene carboxylate | <i>Tinospora rumphii</i> | <i>Org. Biomol. Chem.</i> , 2015, <b>13</b> , 3882-3886 |
|------------|------------------------------------------------------------------------------------------------------------------------------------------------------------------------------|--------------------------|---------------------------------------------------------|

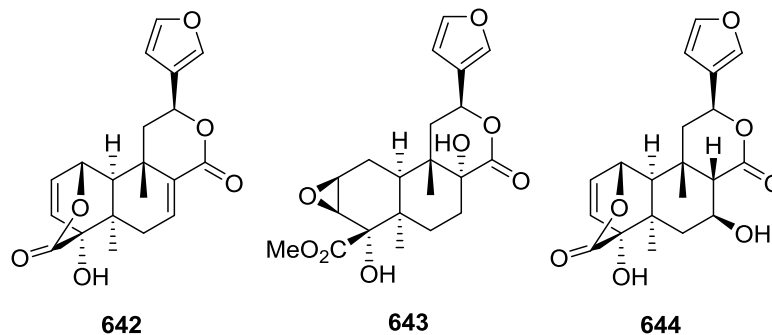

|            |              |                            |                                                         |
|------------|--------------|----------------------------|---------------------------------------------------------|
| <b>642</b> | tinospin E   | <i>Tinospora sagittata</i> | <i>Chem. Pharm. Bull.</i> , 2012, <b>60</b> , 1324-1328 |
| <b>643</b> | tinosporin A |                            | <i>Phytochem. Lett.</i> , 2015, <b>12</b> , 173-176     |
| <b>644</b> | tinosporin B |                            |                                                         |

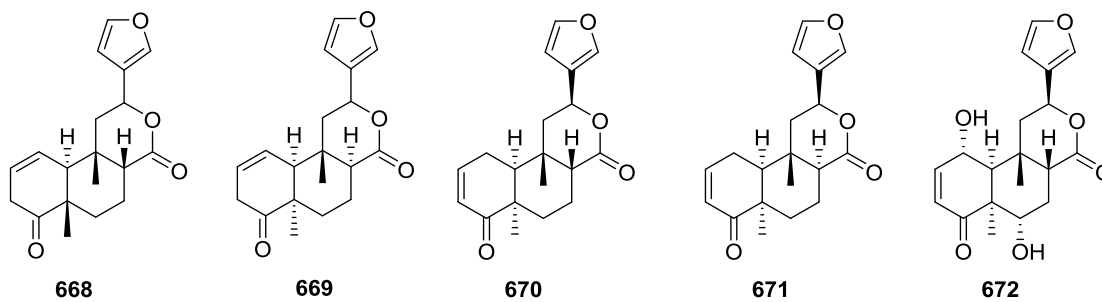

|            |               | R1          | R2         | R3 | R4         |                             |                                                      |
|------------|---------------|-------------|------------|----|------------|-----------------------------|------------------------------------------------------|
| <b>668</b> | tinocallone A | $\beta$ Me  | $\beta$ H  | —  | —          | <i>Tinospora capillipes</i> | <i>Chin. Chem. Lett.</i> , 1992, <b>3</b> , 185-188  |
| <b>669</b> | tinocallone B | $\alpha$ Me | $\alpha$ H | —  | —          |                             |                                                      |
| <b>670</b> | tinocallone C | H           | =O         | H  | $\beta$ H  |                             |                                                      |
| <b>671</b> | tinocallone D | H           | =O         | H  | $\alpha$ H |                             |                                                      |
| <b>672</b> | tincordin     | OH          | =O         | OH | $\beta$ H  | <i>Tinospora cordifolia</i> | <i>Nat. Prod. Res.</i> , 2013, <b>27</b> , 1431-1436 |

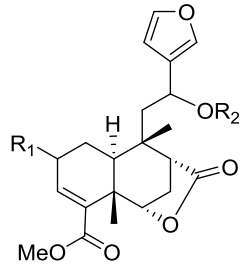

927-929

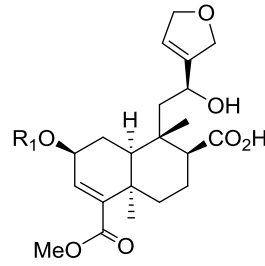

932

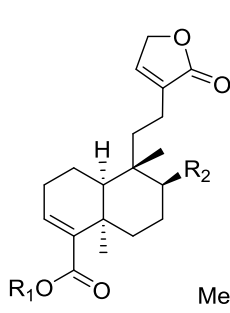

933-935

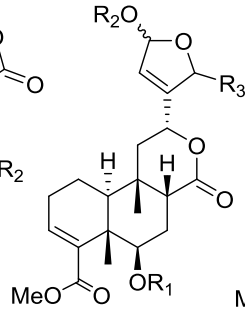

936-938

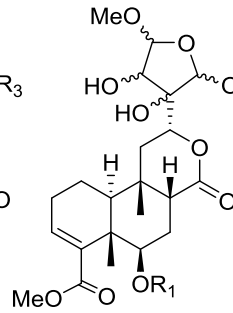

939,940

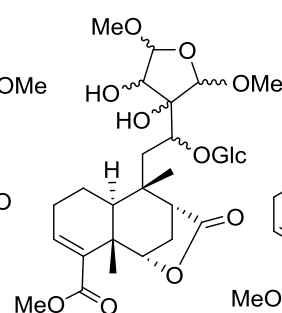

941

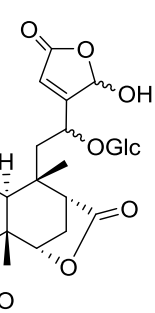

942

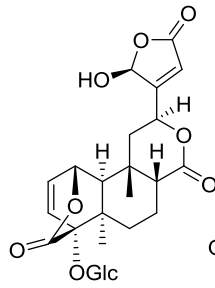

943

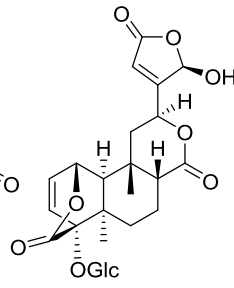

944

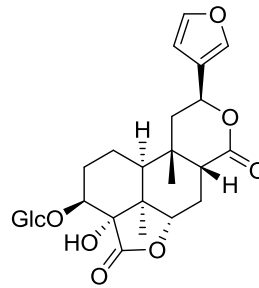

947

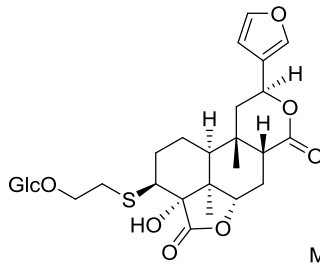

948

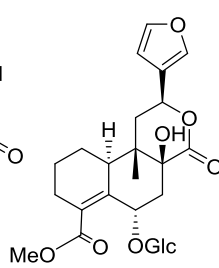

949

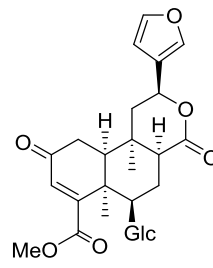

950

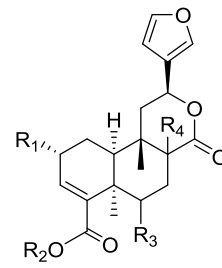

951-961

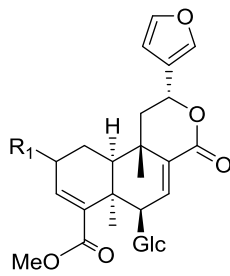

962,963

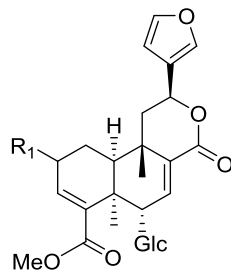

964,965

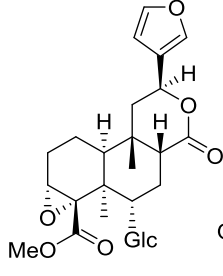

966

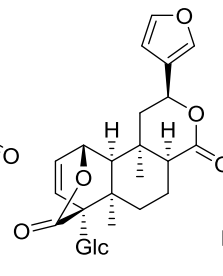

967

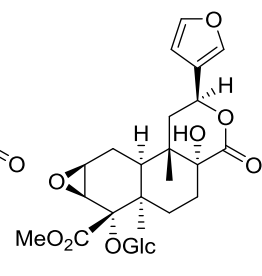

968

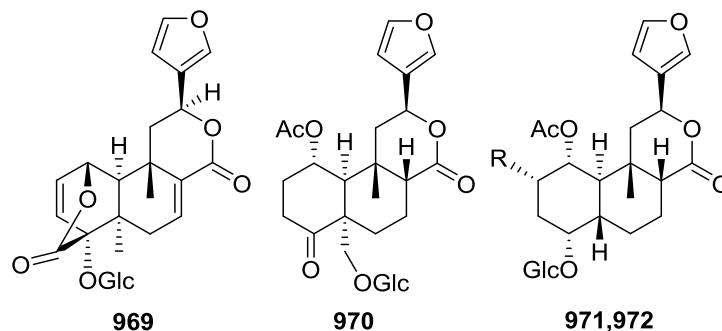

|            |                                                                                                                                                                                               | R1                   | R2                   | R3  | R4 |                                                    |                                                     |
|------------|-----------------------------------------------------------------------------------------------------------------------------------------------------------------------------------------------|----------------------|----------------------|-----|----|----------------------------------------------------|-----------------------------------------------------|
| <b>927</b> | borapetoside D                                                                                                                                                                                | H                    | Glc-(6→1)-Glc        | —   | —  | <i>Tinospora tuberculata</i>                       | <i>Liebig's Ann. Chem.</i> , 1993, 491-495          |
| <b>928</b> | borapetoside E                                                                                                                                                                                | H                    | Glc                  | —   | —  |                                                    |                                                     |
| <b>929</b> | rumphioside I                                                                                                                                                                                 | αOH                  | Glc                  | —   | —  | <i>Tinospora rumphii</i>                           | <i>Phytochemistry</i> , 1996, <b>42</b> , 153-158   |
| <b>932</b> | sagittatayunnanoside B                                                                                                                                                                        | Glc-(6→1)-Glc        |                      |     | —  | <i>Tinospora sagittata</i> var. <i>yunnanensis</i> | <i>Planta Med.</i> , 2014, <b>80</b> , 419-425      |
| <b>933</b> | sagittatayunnanoside A                                                                                                                                                                        | OH                   | CH <sub>2</sub> OGlc |     |    |                                                    |                                                     |
| <b>934</b> | sagittatayunnanoside C                                                                                                                                                                        | OGlc                 | CH <sub>2</sub> OGlc |     |    |                                                    |                                                     |
| <b>935</b> | sagittatayunnanoside D                                                                                                                                                                        | OH                   | CO <sub>2</sub> Glc  | —   | —  |                                                    |                                                     |
| <b>936</b> | rumphioside A                                                                                                                                                                                 | β-D-Glc              | H                    | =O  | —  | <i>Tinospora rumphii</i>                           | <i>Phytochemistry</i> , 1995, <b>40</b> , 1729-1736 |
| <b>937</b> | rumphioside B                                                                                                                                                                                 | β-D-Glc              | Me                   | =O  | —  |                                                    |                                                     |
| <b>938</b> | rumphioside Ac-D                                                                                                                                                                              | Glc(Ac) <sub>4</sub> | Me                   | OMe | —  |                                                    |                                                     |
| <b>939</b> | rumphioside C                                                                                                                                                                                 | β-D-Glc              | —                    | —   | —  |                                                    |                                                     |
| <b>940</b> | rumphioside C-1                                                                                                                                                                               | β-D-Glc              | —                    | —   | —  |                                                    |                                                     |
| <b>941</b> | rumphioside E                                                                                                                                                                                 | —                    | —                    | —   | —  |                                                    |                                                     |
| <b>942</b> | rumphioside F                                                                                                                                                                                 | —                    | —                    | —   | —  |                                                    |                                                     |
| <b>943</b> | cordifolide B                                                                                                                                                                                 | —                    | —                    | —   | —  | <i>Tinospora cordifolia</i>                        | <i>Org. Lett.</i> , 2012, <b>14</b> , 2118-2121     |
| <b>944</b> | cordifolide C                                                                                                                                                                                 | —                    | —                    | —   | —  |                                                    |                                                     |
| <b>947</b> | borapetoside A                                                                                                                                                                                | —                    | —                    | —   | —  | <i>Tinospora crispa</i>                            | <i>J. Nat. Prod.</i> , 2010, <b>73</b> , 541-547    |
| <b>948</b> | cordifolide A                                                                                                                                                                                 | —                    | —                    | —   | —  | <i>Tinospora cordifolia</i>                        | <i>Org. Lett.</i> , 2012, <b>14</b> , 2118-2121     |
| <b>949</b> | cordioside                                                                                                                                                                                    | —                    | —                    | —   | —  |                                                    | <i>Phytochemistry</i> , 1995, <b>38</b> , 447-449   |
| <b>950</b> | (5 <i>R</i> ,6 <i>R</i> ,8 <i>S</i> ,9 <i>R</i> ,10 <i>S</i> ,12 <i>S</i> )-15,16-epoxy-2-oxo-6- <i>O</i> -(β-D-glucopyranosyl)-cleroda-3,13(16),14-trien-17,12-olid-18-oic acid methyl ester | —                    | —                    | —   | —  | <i>Tinospora crispa</i>                            | <i>J. Nat. Prod.</i> , 2010, <b>73</b> , 541-547    |

|     |                                                                                                                                                                                                                                                                      |             |    |                                                                 |             |                              |                                                     |
|-----|----------------------------------------------------------------------------------------------------------------------------------------------------------------------------------------------------------------------------------------------------------------------|-------------|----|-----------------------------------------------------------------|-------------|------------------------------|-----------------------------------------------------|
| 951 | (2 <i>R</i> ,5 <i>R</i> ,6 <i>R</i> ,8 <i>S</i> ,9 <i>S</i> ,10 <i>S</i> ,12 <i>S</i> )-15,16-epoxy-2-hydroxy-6- <i>O</i> -{ $\beta$ -D-glucopyranosyl-(1 $\rightarrow$ 6)- $\alpha$ -D-xylopyranosyl}-cleroda-3,13(16),14-trien-17,12-olid-18-oic acid methyl ester | $\alpha$ OH | Me | $\beta$ -{ $\beta$ -D-Glc-(1 $\rightarrow$ 6)- $\alpha$ -D-Xyl} | $\alpha$ H  |                              |                                                     |
| 952 | (2 <i>R</i> ,5 <i>R</i> ,6 <i>R</i> ,8 <i>R</i> ,9 <i>S</i> ,10 <i>S</i> ,12 <i>S</i> )-15,16-epoxy-2-hydroxy-6- <i>O</i> -( $\beta$ -D-glucopyranosyl)-cleroda-3,13(16),14-trien-17,12-olid-18-oic acid methyl ester                                                | $\alpha$ OH | Me | $\beta$ -( $\beta$ -D-Glc)                                      | $\beta$ H   |                              |                                                     |
| 953 | (5 <i>R</i> ,6 <i>R</i> ,8 <i>S</i> ,9 <i>R</i> ,10 <i>R</i> ,12 <i>S</i> )-15,16-epoxy-2-oxo-6- <i>O</i> -( $\beta$ -D-glucopyranosyl)-cleroda-3,13(16),14-trien-17,12-olid-18-oic acid methyl ester                                                                | =O          | Me | $\beta$ -( $\beta$ -D-Glc)                                      | $\alpha$ H  |                              |                                                     |
| 954 | epi-tinophylloside                                                                                                                                                                                                                                                   | OGlc        | Me | H                                                               | $\alpha$ H  | <i>Tinospora capillipes</i>  | <i>Chin. Chem. Lett.</i> , 1992, <b>3</b> , 185-188 |
| 955 | tinospinoside A                                                                                                                                                                                                                                                      | OGlc        | Me | H                                                               | $\beta$ H   | <i>Tinospora sagittata</i>   | <i>Planta Med.</i> , 2012, <b>78</b> , 82-85        |
| 956 | tinospinoside B                                                                                                                                                                                                                                                      | OGlc        | Me | H                                                               | $\beta$ OH  |                              |                                                     |
| 957 | tinospinoside C                                                                                                                                                                                                                                                      | OGlc        | Me | H                                                               | $\alpha$ OH |                              |                                                     |
| 960 | borapetoside C                                                                                                                                                                                                                                                       | H           | Me | Glc                                                             | H           | <i>Tinospora tuberculata</i> | <i>Liebigs Ann. Chem.</i> , 1993, 491-495           |
| 961 | borapetoside G                                                                                                                                                                                                                                                       | =O          | Me | Glc                                                             | H           |                              |                                                     |
| 962 | borapetoside F                                                                                                                                                                                                                                                       | H           | —  | —                                                               | —           |                              |                                                     |
| 963 | tinoscorside C                                                                                                                                                                                                                                                       | $\alpha$ OH | —  | —                                                               | —           | <i>Tinospora cordifolia</i>  | <i>Fitoterapia</i> , 2010, <b>81</b> , 485-489      |
| 964 | (2 <i>R</i> ,5 <i>R</i> ,6 <i>S</i> ,9 <i>S</i> ,10 <i>S</i> ,12 <i>S</i> )-15,16-epoxy-2-hydroxy-6- <i>O</i> -( $\beta$ -D-glucopyranosyl)-cleroda-3,7,13(16),14-tetraen-17,12-olid-18-oic acid methyl ester                                                        | $\alpha$ OH | —  | —                                                               | —           | <i>Tinospora crispa</i>      | <i>J. Nat. Prod.</i> , 2010, <b>73</b> , 541-547    |
| 965 | (5 <i>R</i> ,6 <i>S</i> ,9 <i>S</i> ,10 <i>S</i> ,12 <i>S</i> )-15,16-epoxy-2-oxo-6- <i>O</i> -( $\beta$ -D-glucopyranosyl)-cleroda-3,7,13(16),14-tetraen-17,12-olid-18-oic acid methyl ester                                                                        | =O          | —  | —                                                               | —           |                              |                                                     |
| 966 | (3 <i>R</i> ,4 <i>R</i> ,5 <i>R</i> ,6 <i>S</i> ,8 <i>R</i> ,9 <i>S</i> ,10 <i>S</i> ,12 <i>S</i> )-15,16-epoxy-3,4-epoxy-6- <i>O</i> -( $\beta$ -D-glucopyranosyl)-cleroda-3,13(16),14-trien-17,12-olid-18-oic acid methyl ester                                    | —           | —  | —                                                               | —           |                              |                                                     |
| 967 | (1 <i>R</i> ,4 <i>S</i> ,5 <i>R</i> ,8 <i>S</i> ,9 <i>R</i> ,10 <i>S</i> ,12 <i>S</i> )-15,16-epoxy-4- <i>O</i> -( $\beta$ -D-glucopyranosyl)-cleroda-2,13(16),14-triene-17(12),18(1)-diolide                                                                        | —           | —  | —                                                               | —           |                              |                                                     |

|     |                    |     |   |   |   |                            |                                                         |
|-----|--------------------|-----|---|---|---|----------------------------|---------------------------------------------------------|
| 968 | tinospinoside D    | —   | — | — | — | <i>Tinospora sagittata</i> | <i>Chem. Pharm. Bull.</i> , 2012, <b>60</b> , 1324-1328 |
| 969 | tinospinoside E    | —   | — | — | — |                            |                                                         |
| 970 | tinosposinenside A | —   | — | — | — | <i>Tinospora sinensis</i>  | <i>J. Nat. Prod.</i> , 2007, <b>70</b> , 1971-1976      |
| 971 | tinosposinenside B | OAc | — | — | — |                            |                                                         |
| 972 | tinosposinenside C | OH  | — | — | — |                            |                                                         |

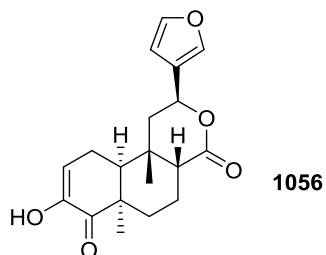

|             |          |                                                  |                                                |
|-------------|----------|--------------------------------------------------|------------------------------------------------|
| <b>1056</b> | sagitone | <i>Tinosporasagittata</i> var. <i>yunnanensi</i> | <i>Molecules</i> , 2010, <b>15</b> , 8360-8365 |
|-------------|----------|--------------------------------------------------|------------------------------------------------|

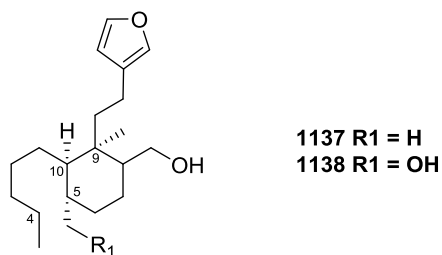

|             |                    |                              |                                                     |
|-------------|--------------------|------------------------------|-----------------------------------------------------|
| <b>1137</b> | tinosporafuranol   | <i>Tinospora cordifolias</i> | <i>Nat. Prod. Res.</i> , 2010, <b>24</b> , 926-9354 |
| <b>1138</b> | tinosporafurandiol |                              |                                                     |

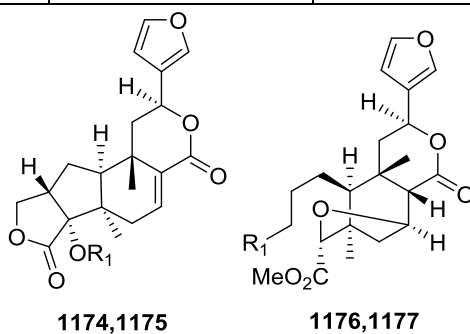

|             |                  |     |                             |                                                       |
|-------------|------------------|-----|-----------------------------|-------------------------------------------------------|
| <b>1174</b> | baenzigeride A   | H   | <i>Tinospora baenzigeri</i> | <i>Phytochemistry</i> , 1999, <b>52</b> , 1335-1340   |
| <b>1175</b> | baenzigeroside A | Glc |                             |                                                       |
| <b>1176</b> | baenzigeride B   | H   |                             | <i>Chem. Pharm. Bull.</i> , 2001, <b>49</b> , 854-857 |
| <b>1177</b> | baenzigeroside B | Glc |                             |                                                       |

**VELLOZIA Genus**

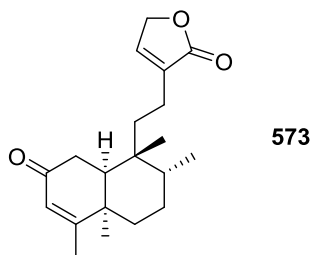

|     |                                                             |                         |                                                     |
|-----|-------------------------------------------------------------|-------------------------|-----------------------------------------------------|
| 573 | 2-oxo-5 $\alpha$ ,8 $\alpha$ -cleroda-3,13-dien-16,15-olide | <i>Vellozia bicolor</i> | <i>Phytochemistry</i> , 1994, <b>37</b> , 1115-1117 |
|-----|-------------------------------------------------------------|-------------------------|-----------------------------------------------------|

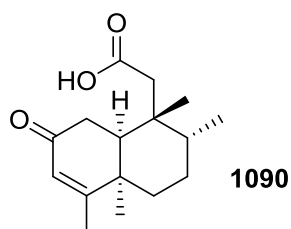

|      |                                                                          |                         |                                                     |
|------|--------------------------------------------------------------------------|-------------------------|-----------------------------------------------------|
| 1090 | 2-oxo-5 $\alpha$ ,8 $\beta$ -13,14,15,16-tetranorclerod-3-en-12-oic acid | <i>Vellozia bicolor</i> | <i>Phytochemistry</i> , 1994, <b>37</b> , 1115-1117 |
|------|--------------------------------------------------------------------------|-------------------------|-----------------------------------------------------|

**ZUELANIA Genus**

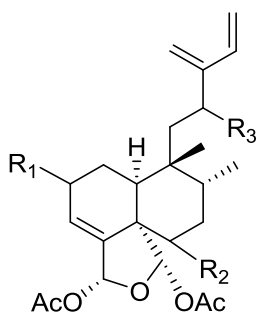

- 17** R<sub>1</sub> =  $\alpha$ -OH, R<sub>2</sub> =  $\alpha$ -OCin, R<sub>3</sub> = H  
**18** R<sub>1</sub> =  $\beta$ -OCin, R<sub>2</sub> =  $\alpha$ -OH, R<sub>3</sub> = H  
**19** R<sub>1</sub> =  $\alpha$ -OH, R<sub>2</sub> =  $\alpha$ -X<sub>13</sub>, R<sub>3</sub> = H  
**20** R<sub>1</sub> =  $\alpha$ -OH, R<sub>2</sub> =  $\alpha$ -X<sub>13</sub>, R<sub>3</sub> =  $\alpha$ -OH

|    |               |                          |                                                  |
|----|---------------|--------------------------|--------------------------------------------------|
| 17 | zuelaguidin A | <i>Zuelania guidonia</i> | <i>J. Nat. Prod.</i> , 2014, <b>77</b> , 455-463 |
| 18 | zuelaguidin B |                          |                                                  |
| 19 | zuelaguidin C |                          |                                                  |
| 20 | zuelaguidin D |                          |                                                  |



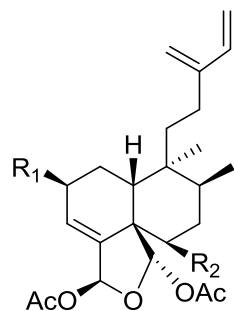

**44** R = OAc, R2 = OCin

**45** R1 = H, R2 = H

**75** R1 = OBz, R2 = OH

|           |                                                                 |                          |                                                     |
|-----------|-----------------------------------------------------------------|--------------------------|-----------------------------------------------------|
| <b>44</b> | <i>rel</i> -2 $\beta$ -acetoxy-isozuelanin-6 $\beta$ -cinnamate | <i>Zuelania guidonia</i> | <i>Phytochemistry</i> , 1990, <b>29</b> , 2939-2942 |
| <b>45</b> | isozuelanin*                                                    |                          |                                                     |
| <b>75</b> | 6 $\beta$ -hydroxyisozuelanin-2 $\beta$ -benzoate               |                          |                                                     |

\* Not an isolated compound

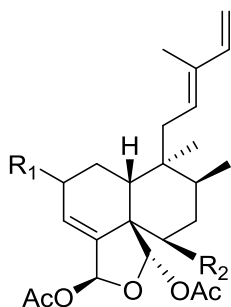

**112** R1 =  $\alpha$ -OH, R2 = OCin

**113** R1 =  $\alpha$ -OCin, R2 = OH

**114** R1 =  $\beta$ -OH, R2 = OCin

**120** R1 =  $\alpha$ -OAc, R2 = OH

**121** R1 =  $\alpha$ -OOct, R2 = OH

**122** R1 =  $\beta$ -OOct, R2 = OH

**123** R1 =  $\beta$ -OBz, R2 = OH

**124** R1 =  $\alpha$ -OH, R2 = OBz

**125** R1 =  $\alpha$ -OH, R2 = X8

**126** R1 =  $\beta$ -OBz, R2 = H

|            |                                                                         |                          |                                                     |
|------------|-------------------------------------------------------------------------|--------------------------|-----------------------------------------------------|
| <b>112</b> | <i>rel</i> -2 $\alpha$ -hydroxyzuelanin-6 $\beta$ -cinnamate            | <i>Zuelania guidonia</i> | <i>Phytochemistry</i> , 1990, <b>29</b> , 1609-1614 |
| <b>113</b> | <i>rel</i> -6 $\beta$ -hydroxyzuelanin-2 $\alpha$ -cinnamate            |                          |                                                     |
| <b>114</b> | <i>rel</i> -2 $\beta$ -hydroxyzuelanin-6 $\beta$ -cinnamate             |                          |                                                     |
| <b>120</b> | 6 $\beta$ -hydroxyzuelanin-2 $\alpha$ -acetate                          | <i>Zuelania guidonia</i> | <i>Phytochemistry</i> , 1990, <b>29</b> , 2939-2942 |
| <b>121</b> | 6 $\beta$ -hydroxyzuelanin-2 $\alpha$ - <i>n</i> -octacetate            |                          |                                                     |
| <b>122</b> | 6 $\beta$ -hydroxyzuelanin-2 $\beta$ - <i>n</i> -octacetate             |                          |                                                     |
| <b>123</b> | 6 $\beta$ -hydroxyzuelanin-2 $\beta$ - <i>n</i> -benzoate               |                          |                                                     |
| <b>124</b> | 2 $\alpha$ -hydroxyzuelanin-6 $\beta$ - <i>n</i> -benzoate              |                          |                                                     |
| <b>125</b> | 2 $\alpha$ -hydroxyzuelanin-6 $\beta$ - <i>n</i> -(3-hydroxy)-octanoate |                          |                                                     |
| <b>126</b> | zuelanin-2 $\beta$ -benzoate                                            |                          |                                                     |

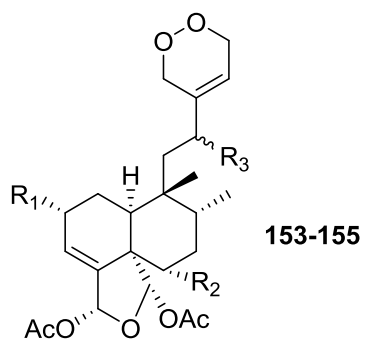

|            |               | R1 | R2   | R3          |                          |                                                  |
|------------|---------------|----|------|-------------|--------------------------|--------------------------------------------------|
| <b>153</b> | zuelaguidin E | OH | OCin | H           | <i>Zuelania guidonia</i> | <i>J. Nat. Prod.</i> , 2014, <b>77</b> , 455-463 |
| <b>154</b> | zuelaguidin G | Dc | OXyl | $\beta$ OH  |                          |                                                  |
| <b>155</b> | zuelaguidin H | Dc | OXyl | $\alpha$ OH |                          |                                                  |

## Abbreviation of Functional Groups

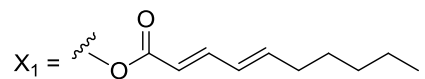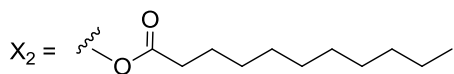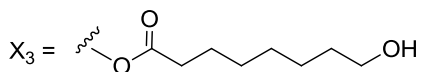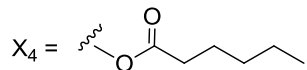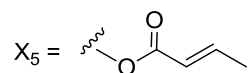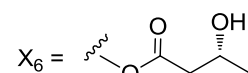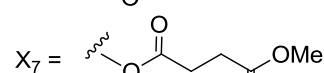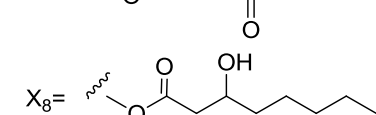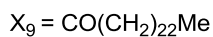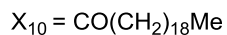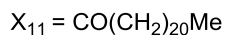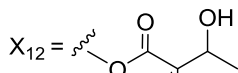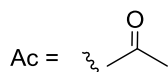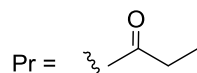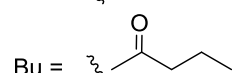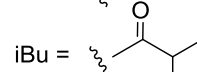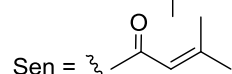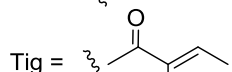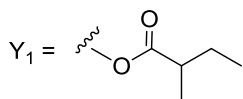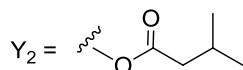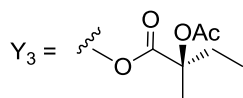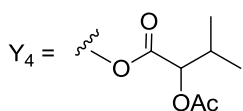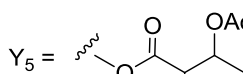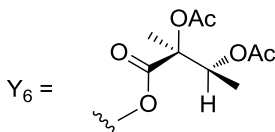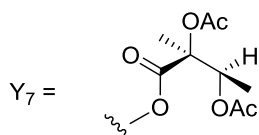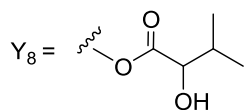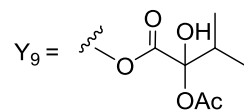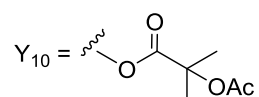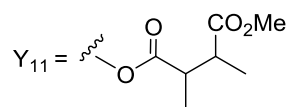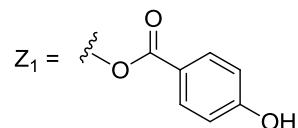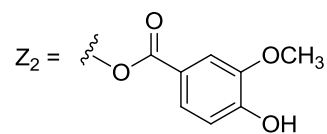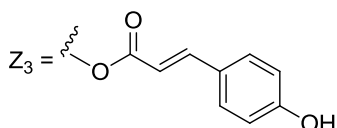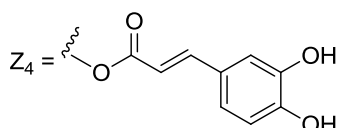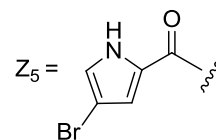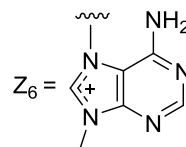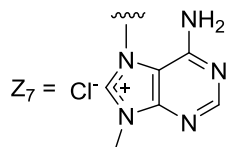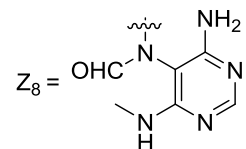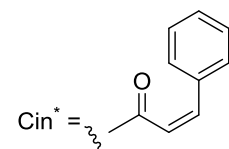

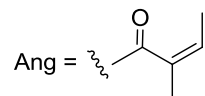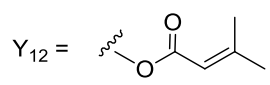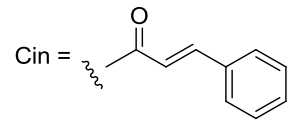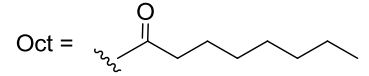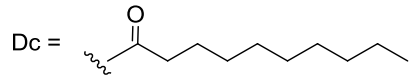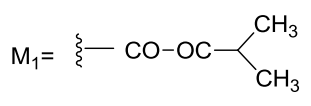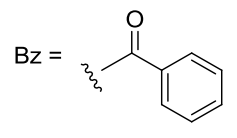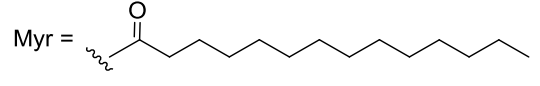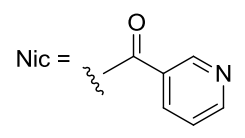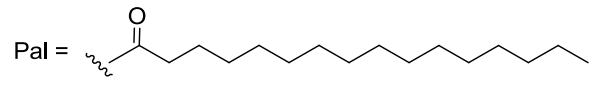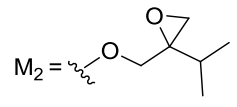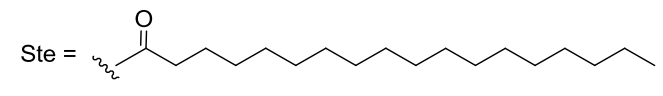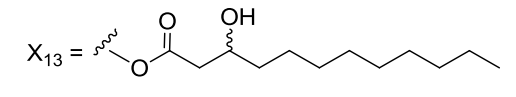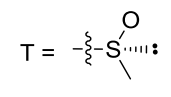

Supplement: NIHMS834275-supplement-Supplementary_Information_1.pdf [file NIHMS834275-supplement-Supplementary_Information_1.pdf]
