# Supplementary material
Source: PubMed Central journal article supplement (PMC5154363)

**SUPPLEMENTARY MATERIAL for**

**Clerodane Diterpenes: Sources, Structures, and Biological Activities**

*Rongtao Li<sup>a,b\*</sup>, Susan L. Morris-Natschke<sup>b</sup>, and Kuo-Hsiung Lee<sup>b,c\*</sup>*

**CONTENT:**

**Tables 2–32: Compound Structures arranged by Chemical Classifications**

**Abbreviations of Functional Groups**

## Structure Classifications and Sources of Clerodane Diterpenes

### 1. Type I with an Acyclic Side Chain at C-9

#### 1.1. Type I Subtype I with an *O*-Containing Five-membered Ring at C-18 and C-19

##### 1.1.1. Type I Subtype Ia with the Isozuelanin Skeleton (Table 2)\*

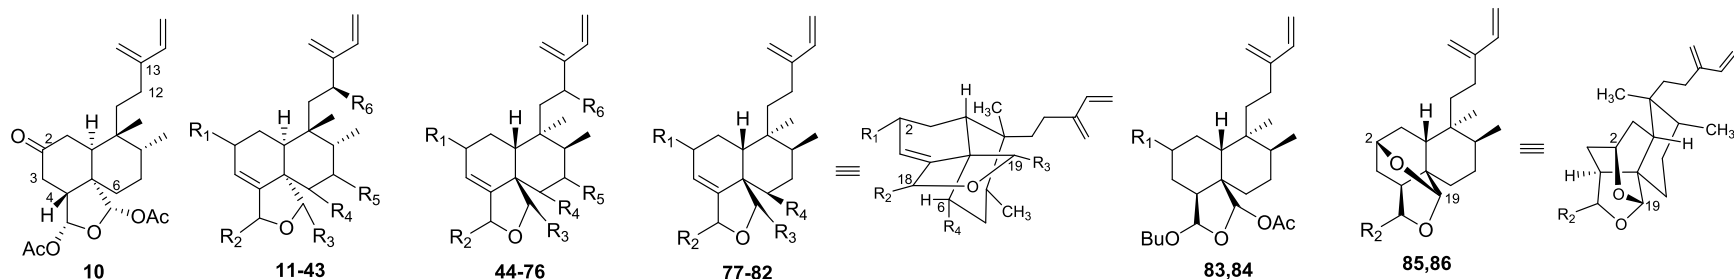

| No. | Compound Name    | R <sub>1</sub>  | R <sub>2</sub> | R <sub>3</sub> | R <sub>4</sub>   | R <sub>5</sub>  | R <sub>6</sub> | Source                        | Ref.                                                     |
|-----|------------------|-----------------|----------------|----------------|------------------|-----------------|----------------|-------------------------------|----------------------------------------------------------|
| 10  | balanspene A     | —               | —              | —              | —                | —               | —              | <i>Casearia<br/>balansae</i>  | <i>J. Nat. Prod.</i> ,<br>2014, <b>77</b> ,<br>2182–2189 |
| 11  | balanspene B     | =O              | αOBu           | αOAc           | H                | H               | H              |                               |                                                          |
| 12  | balanspene C     | αY <sub>1</sub> | αOBu           | αOAc           | H                | H               | H              |                               |                                                          |
| 13  | balanspene D     | αOBu            | αOBu           | αOAc           | αOMe             | H               | H              |                               |                                                          |
| 14  | balanspene E     | αY <sub>1</sub> | αOBu           | αOAc           | αOMe             | H               | H              |                               |                                                          |
| 15  | balanspene F     | αY <sub>1</sub> | αOMe           | αOAc           | αOMe             | H               | H              |                               |                                                          |
| 16  | balanspene G     | βOAc            | αOMe           | αOAc           | αOMe             | H               | H              |                               |                                                          |
| 17  | zuelaguidin A    | αOH             | αOAc           | αOAc           | αOCin            | H               | H              | <i>Zuelania<br/>guidonia</i>  | <i>J. Nat. Prod.</i> ,<br>2014, <b>77</b> , 455-463      |
| 18  | zuelaguidin B    | βOCin           | αOAc           | αOAc           | αOH              | H               | H              |                               |                                                          |
| 19  | zuelaguidin C    | αOH             | αOAc           | αOAc           | αX <sub>13</sub> | H               | H              |                               |                                                          |
| 20  | zuelaguidin D    | αOH             | αOAc           | αOAc           | αX <sub>13</sub> | H               | αOH            |                               |                                                          |
| 21  | casearupestrin A | αOH             | αOAc           | βOAc           | αX <sub>1</sub>  | βOH             | H              | <i>Casearia<br/>rupestrin</i> | <i>J. Nat. Prod.</i> ,<br>2011, <b>74</b> 776–781        |
| 22  | casearupestrin B | αOH             | αOAc           | βOAc           | αOH              | βX <sub>1</sub> | H              |                               |                                                          |
| 23  | casearupestrin C | αOH             | αOMe           | βOAc           | αOH              | βX <sub>1</sub> | H              |                               |                                                          |
| 24  | casearupestrin D | αOH             | αOAc           | βOAc           | αOAc             | βX <sub>1</sub> | H              |                               |                                                          |
| 25  | corymbulosin A   | X <sub>1</sub>  | OAc            | OAc            | OH               | H               | H              | <i>Laetia</i>                 | <i>Phytochemistry</i> ,                                  |

|    |                                                                                                                                                                                                                         |                         |              |              |                |             |     |                            |                                                           |
|----|-------------------------------------------------------------------------------------------------------------------------------------------------------------------------------------------------------------------------|-------------------------|--------------|--------------|----------------|-------------|-----|----------------------------|-----------------------------------------------------------|
| 26 | corymbulosin B                                                                                                                                                                                                          | OH                      | OAc          | OAc          | ODc            | H           | H   | <i>corymbulosa</i>         | 2000, <b>55</b> , 233-236                                 |
| 27 | corymbulosin C                                                                                                                                                                                                          | OH                      | OAc          | OAc          | ODc            | H           | H   |                            |                                                           |
| 28 | <i>ent</i> -6 $\beta$ -hydroxyisozuelanin-2 $\beta$ -(2-methyl)-butanoate                                                                                                                                               | $\alpha$ Y <sub>1</sub> | $\alpha$ OAc | $\beta$ OAc  | $\alpha$ OH    | H           | H   | <i>Casearia corymbosa</i>  | <i>Phytochemistry</i> ,<br>1990, <b>29</b> ,<br>3591-3595 |
| 29 | <i>ent</i> -6 $\beta$ -methoxyisozuelanin-2 $\beta$ -(2-methyl)-butanoate                                                                                                                                               | $\alpha$ Y <sub>1</sub> | $\alpha$ OAc | $\beta$ OAc  | $\alpha$ OMe   | H           | H   |                            |                                                           |
| 30 | <i>ent</i> -2 $\beta$ -(2-methyl)butoxy-3,4-dihydro-4 $\alpha$ -isozuelanin                                                                                                                                             | $\alpha$ Y <sub>1</sub> | $\alpha$ OAc | $\beta$ OAc  | H              | H           | H   |                            |                                                           |
| 31 | <i>ent</i> -6 $\beta$ -hydroxyisozuelanin-2 $\beta$ -(2-methyl)-propanoate                                                                                                                                              | $\alpha$ OiBu           | $\alpha$ OAc | $\beta$ OAc  | $\alpha$ OH    | H           | H   |                            |                                                           |
| 32 | <i>ent</i> -6 $\beta$ -methoxyisozuelanin-2 $\beta$ -(2-methyl)-propanoate                                                                                                                                              | $\alpha$ OiBu           | $\alpha$ OAc | $\beta$ OAc  | $\alpha$ OMe   | H           | H   |                            |                                                           |
| 33 | <i>ent</i> -2 $\beta$ -hydroxy-3,4-dihydro-4 $\alpha$ -isozuelanin                                                                                                                                                      | $\alpha$ OH             | $\alpha$ OAc | $\beta$ OAc  | H              | H           | H   |                            |                                                           |
| 34 | <i>ent</i> -2 $\beta$ -acetoxy-3,4-dihydro-4 $\alpha$ -isozuelanin                                                                                                                                                      | $\alpha$ OAc            | $\alpha$ OAc | $\beta$ OAc  | H              | H           | H   | <i>Licania</i>             | <i>J. Nat. Prod.</i> ,<br>2001, <b>64</b> , 497-501       |
| 35 | intrapetacin A                                                                                                                                                                                                          | $\beta$ Z <sub>1</sub>  | $\alpha$ OMe | $\alpha$ OAc | $\alpha$ OH    | H           | H   |                            |                                                           |
| 36 | intrapetacin B                                                                                                                                                                                                          | $\beta$ Z <sub>1</sub>  | $\alpha$ OAc | $\alpha$ OAc | $\alpha$ OH    | H           | H   | <i>intrapetiolaris</i>     |                                                           |
| 37 | caseanigrescen A                                                                                                                                                                                                        | $\alpha$ OBu            | $\alpha$ OAc | $\alpha$ OAc | $\alpha$ OH    | $\beta$ OAc | H   | <i>Casearia nigrescens</i> | <i>J. Nat. Prod.</i> ,<br>2007, <b>70</b> , 206-209       |
| 38 | caseanigrescen B                                                                                                                                                                                                        | $\alpha$ OBu            | $\alpha$ OAc | $\alpha$ OAc | $\alpha$ OH    | $\beta$ OH  | H   |                            |                                                           |
| 39 | caseanigrescen C                                                                                                                                                                                                        | $\alpha$ OBu            | $\alpha$ OAc | $\alpha$ OAc | $\alpha$ OAc   | $\beta$ OH  | H   |                            |                                                           |
| 40 | caseanigrescen D                                                                                                                                                                                                        | $\alpha$ OBu            | $\alpha$ OAc | $\alpha$ OAc | $\alpha$ OH    | H           | H   |                            |                                                           |
| 41 | argutin F                                                                                                                                                                                                               | $\alpha$ X <sub>1</sub> | $\alpha$ OAc | $\alpha$ OAc | OH             | $\beta$ H   | OOH | <i>Casearia arguta</i>     | <i>J. Nat. Prod.</i> ,<br>2010, <b>73</b> ,<br>2013-2018  |
| 42 | argutin G                                                                                                                                                                                                               | $\alpha$ X <sub>1</sub> | $\alpha$ OAc | $\alpha$ OAc | OH             | $\beta$ OH  | OOH |                            |                                                           |
| 43 | argutin H                                                                                                                                                                                                               | $\alpha$ OH             | $\alpha$ OAc | $\alpha$ OAc | X <sub>1</sub> | $\beta$ OH  | OOH |                            |                                                           |
| 44 | <i>rel</i> -2 $\beta$ -acetoxyisozuelanin-6 $\beta$ -cinnamate                                                                                                                                                          | $\beta$ OAc             | $\beta$ OAc  | $\alpha$ OAc | $\beta$ OCin   | H           | H   | <i>Zuelania guidonia</i>   | <i>Phytochemistry</i> ,<br>1990, <b>29</b> ,<br>2939-2942 |
| 45 | isozuelanin**                                                                                                                                                                                                           | H                       | $\beta$ OAc  | $\alpha$ OAc | H              | H           | H   |                            |                                                           |
| 46 | <i>rel</i> -18( <i>S</i> ),19( <i>R</i> )-diacetoxy-18,19-epoxy-6( <i>R</i> )-methoxy-2( <i>S</i> )-(2 $\zeta$ -methylbutanoyloxy)-5( <i>R</i> ),8( <i>S</i> ),9( <i>S</i> ),10( <i>R</i> )-cleroda-3,13(16),14-triene  | $\beta$ Y <sub>1</sub>  | $\beta$ OAc  | $\beta$ OAc  | $\beta$ OMe    | H           | H   | <i>Casearia tremula</i>    | <i>Phytochemistry</i> ,<br>1996, <b>41</b> , 565-570      |
| 47 | <i>rel</i> -18( <i>S</i> ),19( <i>R</i> )-diacetoxy-18,19-epoxy-2( <i>S</i> )-(2 $\zeta$ -methylbutanoyloxy)-5( <i>R</i> ),8( <i>S</i> ),9( <i>S</i> ),10( <i>R</i> )-cleroda-3,13(16),14-triene                        | $\beta$ Y <sub>1</sub>  | $\beta$ OAc  | $\beta$ OAc  | $\beta$ H      | H           | H   |                            |                                                           |
| 48 | <i>rel</i> -18( <i>S</i> ),19( <i>R</i> )-diacetoxy-18,19-epoxy-6( <i>R</i> )-hydroxy-2( <i>S</i> )-(2 $\zeta$ -methylbutanoyloxy)-5( <i>R</i> ),8( <i>S</i> ),9( <i>S</i> ),10( <i>R</i> )-cleroda-3,13(16),14-triene  | $\beta$ Y <sub>1</sub>  | $\beta$ OAc  | $\beta$ OAc  | $\beta$ OH     | H           | H   |                            |                                                           |
| 49 | <i>rel</i> -18( <i>S</i> ),19( <i>R</i> )-diacetoxy-18,19-epoxy-6( <i>R</i> )-hydroxy-2( <i>S</i> )-undecanoyloxy-5( <i>R</i> ),8( <i>S</i> ),9( <i>S</i> ),10( <i>R</i> )-cleroda-3,13(16),14-triene                   | $\beta$ X <sub>2</sub>  | $\beta$ OAc  | $\beta$ OAc  | $\beta$ OH     | H           | H   |                            |                                                           |
| 50 | <i>rel</i> -18( <i>S</i> ),19( <i>R</i> )-diacetoxy-18,19-epoxy-6( <i>R</i> )-hydroxy-2( <i>S</i> )-octanoyloxy-5( <i>R</i> ),8( <i>S</i> ),9( <i>S</i> ),10( <i>R</i> )-cleroda-3,13(16),14-triene                     | $\beta$ OOct            | $\beta$ OAc  | $\beta$ OAc  | $\beta$ OH     | H           | H   |                            |                                                           |
| 51 | <i>rel</i> -18( <i>S</i> ),19( <i>R</i> )-diacetoxy-18,19-epoxy-6( <i>R</i> )-hydroxy-2( <i>S</i> )-(3 $\zeta$ -hydroxyoctanoyloxy)-5( <i>R</i> ),8( <i>S</i> ),9( <i>S</i> ),10( <i>R</i> )-cleroda-3,13(16),14-triene | $\beta$ X <sub>3</sub>  | $\beta$ OAc  | $\beta$ OAc  | $\beta$ OH     | H           | H   |                            |                                                           |
| 52 | <i>rel</i> -18( <i>S</i> ),19( <i>R</i> )-diacetoxy-18,19-epoxy-2( <i>R</i> )-hexanoyloxy-5( <i>R</i> ),8( <i>S</i> ),9( <i>S</i> ),10( <i>R</i> )-cleroda-3,13(16),14-triene                                           | $\alpha$ X <sub>4</sub> | $\beta$ OAc  | $\beta$ OAc  | H              | H           | H   |                            |                                                           |

|    |                                                                                                                             |                         |             |              |             |             |             |                                                       |                                                    |
|----|-----------------------------------------------------------------------------------------------------------------------------|-------------------------|-------------|--------------|-------------|-------------|-------------|-------------------------------------------------------|----------------------------------------------------|
| 53 | casearlucin B                                                                                                               | $\alpha$ OAc            | $\beta$ OAc | $\beta$ OAc  | $\beta$ OMe | H           | H           | Casearia<br>lucida                                    | J. Nat. Prod.,<br>2002, <b>65</b> , 100-107        |
| 54 | casearlucin D                                                                                                               | $\beta$ Y <sub>1</sub>  | $\beta$ OAc | $\beta$ OAc  | $\beta$ OAc | H           | H           |                                                       |                                                    |
| 55 | casearlucin H                                                                                                               | $\beta$ Y <sub>1</sub>  | $\beta$ OAc | $\beta$ OAc  | $\beta$ OH  | H           | $\alpha$ OH |                                                       |                                                    |
| 56 | casearlucin I                                                                                                               | $\beta$ Y <sub>1</sub>  | $\beta$ OAc | $\beta$ OAc  | $\beta$ OH  | H           | $\beta$ OH  |                                                       |                                                    |
| 57 | casearlucin M                                                                                                               | $\beta$ Y <sub>1</sub>  | $\beta$ OAc | $\beta$ OAc  | $\beta$ OMe | H           | H           |                                                       |                                                    |
| 58 | casearlucin J                                                                                                               | $\alpha$ Y <sub>1</sub> | $\beta$ OAc | $\beta$ OAc  | $\beta$ OH  | H           | $\alpha$ OH |                                                       |                                                    |
| 59 | casearlucin K                                                                                                               | $\alpha$ Y <sub>1</sub> | $\beta$ OAc | $\beta$ OAc  | $\beta$ OH  | H           | $\beta$ OH  | Casearia<br>membranacea                               | J. Nat. Prod.,<br>2004, <b>67</b> , 316-321        |
| 60 | caseamembrin A                                                                                                              | $\beta$ Y <sub>1</sub>  | $\beta$ OBu | $\beta$ OAc  | $\beta$ OH  | H           | H           |                                                       |                                                    |
| 61 | caseamembrin B                                                                                                              | $\beta$ Y <sub>1</sub>  | $\beta$ OMe | $\beta$ OAc  | $\beta$ OH  | H           | H           |                                                       |                                                    |
| 62 | caseamembrin C                                                                                                              | $\beta$ Y <sub>1</sub>  | $\beta$ OBu | $\beta$ OAc  | $\beta$ OH  | $\beta$ OH  | H           |                                                       |                                                    |
| 63 | caseamembrin D                                                                                                              | $\beta$ Y <sub>1</sub>  | $\beta$ OBu | $\beta$ OAc  | $\beta$ OH  | $\beta$ OAc | H           |                                                       |                                                    |
| 64 | caseamembrin E                                                                                                              | $\alpha$ Y <sub>1</sub> | $\beta$ OAc | $\beta$ OAc  | $\beta$ OH  | H           | H           |                                                       |                                                    |
| 65 | caseamembrin M                                                                                                              | $\beta$ Y <sub>1</sub>  | $\beta$ OAc | $\beta$ OAc  | $\beta$ OBu | H           | H           |                                                       |                                                    |
| 66 | caseamembrin N                                                                                                              | $\beta$ Y <sub>1</sub>  | $\beta$ OAc | $\beta$ OAc  | $\beta$ OH  | $\beta$ OAc | H           | J. Nat. Prod.,<br>2005, <b>68</b> ,<br>1665-1668      |                                                    |
| 67 | caseamembrin O                                                                                                              | $\beta$ Y <sub>2</sub>  | $\beta$ OAc | $\beta$ OAc  | $\beta$ OH  | $\beta$ OAc | H           |                                                       |                                                    |
| 68 | caseamembrin B                                                                                                              | $\alpha$ Y <sub>1</sub> | $\beta$ OAc | $\beta$ OAc  | $\beta$ OH  | H           | $\beta$ OH  | Chem. Pharm.<br>Bull., 2004, <b>52</b> ,<br>108-110   |                                                    |
| 69 | rel-2(R),18(S),19(R)-triacetoxy-18,19-epoxy-4(S),5(S),9(S),10(R)-clerodan-13(16),14-dien-6-one                              | $\alpha$ OAc            | $\beta$ OAc | $\beta$ OAc  | =O          | H           | H           | Casearia<br>grayi                                     | Nat. Prod.<br>Commun., 2006,<br><b>1</b> , 441-448 |
| 70 | rel-2(R),18(S),19(R)-tri-acetoxy-18,19-epoxy-4(S),5(R),8(S),9(S),10(R)-clerodan-13(16),14-diene                             | $\alpha$ OAc            | $\beta$ OAc | $\beta$ OAc  | H           | H           | H           |                                                       |                                                    |
| 71 | rel-18(S),19(R)-diacetoxy-18,19-epoxy-2(R)-(2- $\zeta$ -methylbutanoyl)-4(S),-5(S),9(S),10(R)-clerodan-13(16),14-dien-6-one | $\alpha$ Y <sub>1</sub> | $\beta$ OAc | $\beta$ OAc  | =O          | H           | H           |                                                       |                                                    |
| 72 | rel-18(S),19(R)-diacetoxy-18,19-epoxy-2(R)-isobutanoyl-4(S),5(R),9(S),-10(R)-clerodan-13(16),14-diene                       | $\alpha$ OiBu           | $\beta$ OAc | $\beta$ OAc  | H           | H           | H           |                                                       |                                                    |
| 73 | rel-18(S),19(R)-diacetoxy-18,19-epoxy-2(R)-(2- $\zeta$ -methylbutanoyl)-4(S),5(R),9(S),10(R)-clerodan-13(16),14-diene       | $\alpha$ Y <sub>1</sub> | $\beta$ OAc | $\beta$ OAc  | H           | H           | H           | Biochem. Syst.<br>Ecol., 2007, <b>35</b> ,<br>631-633 |                                                    |
| 74 | caseargrewiin A                                                                                                             | $\beta$ Y <sub>2</sub>  | $\beta$ OAc | $\beta$ OAc  | $\beta$ OMe | H           | H           | Casearia<br>grewwifolia                               | J. Nat. Prod.,<br>2005, <b>68</b> , 183-188        |
| 75 | 6 $\beta$ -hydroxyisozuelanin-2 $\beta$ -benzoate                                                                           | $\beta$ OBz             | $\beta$ OAc | $\alpha$ OAc | $\beta$ OH  | H           | H           | Zuelania<br>guidonia                                  | Phytochemistry,<br>1990, <b>29</b> ,<br>2939-2942  |
| 76 | esculentin A                                                                                                                | =O                      | $\beta$ OAc | $\beta$ OAc  | H           | H           | H           | Casearia                                              | Indian J. Chem.,                                   |

|           |                       |                        |             |     |     |   |   |  |                              |                                                          |
|-----------|-----------------------|------------------------|-------------|-----|-----|---|---|--|------------------------------|----------------------------------------------------------|
|           |                       |                        |             |     |     |   |   |  | <i>esculenta</i>             | 2002, <b>41B</b> ,<br>2706-2708                          |
| <b>77</b> | caseabalansin C       | $\alpha$ OAc           | OEt         | OAc | OMe | — | — |  | <i>Casearia<br/>balansae</i> | <i>J. Nat. Prod.</i> ,<br>2013, <b>76</b> ,<br>1573-1579 |
| <b>78</b> | 2-epicaseabalansin C  | $\beta$ OAc            | OEt         | OAc | OMe | — | — |  |                              |                                                          |
| <b>79</b> | caseabalansin D       | $\beta$ Y <sub>1</sub> | OEt         | OAc | OH  | — | — |  |                              |                                                          |
| <b>80</b> | caseabalansin E       | $\beta$ Y <sub>1</sub> | OMe         | OH  | OMe | — | — |  |                              |                                                          |
| <b>81</b> | caseabalansin F       | =O                     | OAc         | OAc | OMe | — | — |  |                              |                                                          |
| <b>82</b> | caseabalansin G       | =O                     | OBu         | OAc | OMe | — | — |  |                              |                                                          |
| <b>83</b> | caseabalansin B       | $\alpha$ OH            | —           | —   | —   | — | — |  |                              |                                                          |
| <b>84</b> | 2-epicaseabalansin B  | $\beta$ OH             | —           | —   | —   | — | — |  |                              |                                                          |
| <b>85</b> | caseabalansin A       | —                      | $\beta$ OH  | —   | —   | — | — |  |                              |                                                          |
| <b>86</b> | 18-epicaseabalansin A | —                      | $\alpha$ OH | —   | —   | — | — |  |                              |                                                          |

\* It should be noted that the absolute stereochemistry has not been determined in all cases. For example, esculentin A (**76**) has been reported in both *ent-neo*<sup>16</sup> and *neo*<sup>32</sup> configurations. In addition, caseargrewiin A (**74**) was shown as a *neo*-clerodane, while the co-isolated caseargrewiins B–D (**1256–1258**) were shown as *ent-neo*-clerodanes, with the absolute configuration of C-2 in **1258** established by a modified Mosher's method, NMR coupling constants, and NOESY correlations.<sup>31</sup> Generally, this review has focused on relative configurations only.

\*\* Not an isolated compound

### 1.1.2. Type I Subtype Ib with the Zuelanin Skeleton (Table 3)

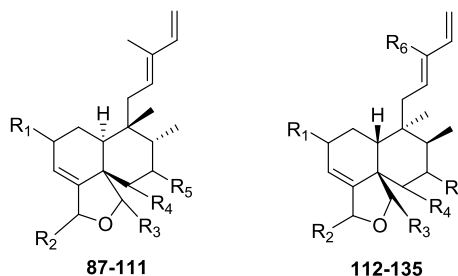

| No. | Compound Name     | R <sub>1</sub>  | R <sub>2</sub> | R <sub>3</sub> | R <sub>4</sub>  | R <sub>5</sub> | R <sub>6</sub> | Source                      | Ref.                                                          |
|-----|-------------------|-----------------|----------------|----------------|-----------------|----------------|----------------|-----------------------------|---------------------------------------------------------------|
| 87  | casearvestrin A   | βOiBu           | αOAc           | αOAc           | αOH             | H              | —              | <i>Casearia sylvestris</i>  | <i>J. Nat. Prod.</i> , 2002, <b>65</b> , 95-99                |
| 88  | casearvestrin B   | βY <sub>1</sub> | αOAc           | αOAc           | αOH             | H              | —              |                             |                                                               |
| 89  | casearvestrin C   | βX <sub>4</sub> | αOAc           | αOAc           | αOH             | H              | —              |                             |                                                               |
| 90  | argutin A         | αX <sub>1</sub> | αOAc           | αOAc           | OH              | H              | —              | <i>Casearia arguta</i>      | <i>J. Nat. Prod.</i> , 2010, <b>73</b> , 2013-2018            |
| 91  | argutin B         | αOH             | αOAc           | αOAc           | X <sub>1</sub>  | H              | —              |                             |                                                               |
| 92  | argutin C         | αX <sub>1</sub> | αOAc           | αOAc           | OH              | OH             | —              |                             |                                                               |
| 93  | argutin D         | αOH             | αOAc           | αOAc           | X <sub>1</sub>  | OH             | —              |                             |                                                               |
| 94  | argutin E         | αX <sub>1</sub> | αOAc           | αOAc           | H               | OH             | —              |                             |                                                               |
| 95  | esculentin B      | αY <sub>2</sub> | βOAc           | βOAc           | βOH             | αOH            | —              | <i>Casearia esculenta</i>   | <i>Indian J. Chem.</i> , 2002, <b>41B</b> , 2706-2708         |
| 96  | casearborin A     | αZ <sub>1</sub> | αOAc           | αOAc           | αH              | H              | —              | <i>Casearia arborea</i>     | <i>J. Nat. Prod.</i> , 2000, <b>63</b> , 657-661              |
| 97  | casearborin B     | αZ <sub>2</sub> | αOAc           | αOAc           | αH              | H              | —              |                             |                                                               |
| 98  | casearborin C     | αOH             | αOAc           | αOAc           | αZ <sub>1</sub> | H              | —              |                             |                                                               |
| 99  | casearborin D     | αZ <sub>1</sub> | αOAc           | αOAc           | αOH             | H              | —              |                             |                                                               |
| 100 | casearborin E     | αOAc            | αOAc           | αOAc           | αZ <sub>1</sub> | H              | —              |                             |                                                               |
| 101 | laetiaprocerine A | αY <sub>1</sub> | βOAc           | βOAc           | αOH             | H              | —              | <i>Laetia procera</i>       | <i>Bioorg. Med. Chem. Lett.</i> , 2005, <b>15</b> , 5065-5070 |
| 102 | laetiaprocerine B | αOiBu           | βOAc           | βOAc           | αOBz            | H              | —              |                             |                                                               |
| 103 | laetiaprocerine C | αY <sub>1</sub> | βOAc           | βOAc           | αOBz            | H              | —              |                             |                                                               |
| 104 | caseargrewiin E   | αOBu            | αOAc           | αOAc           | H               | H              | —              | <i>Casearia grewiifolia</i> | <i>J. Nat. Prod.</i> , 2007, <b>70</b> , 1122-1126            |
| 105 | caseargrewiin F   | αOBu            | αOAc           | αOAc           | αOH             | H              | —              |                             |                                                               |
| 106 | caseargrewiin G   | αOBu            | αOMe           | αOAc           | αOH             | H              | —              |                             |                                                               |
| 107 | caseargrewiin H   | αX <sub>4</sub> | αOAc           | αOAc           | H               | H              | —              |                             |                                                               |
| 108 | caseargrewiin I   | αX <sub>4</sub> | αOAc           | αOAc           | αOH             | H              | —              |                             |                                                               |

|     |                                                                                                                                    |               |              |              |              |               |                    |                             |                                                             |
|-----|------------------------------------------------------------------------------------------------------------------------------------|---------------|--------------|--------------|--------------|---------------|--------------------|-----------------------------|-------------------------------------------------------------|
| 109 | caseargrewiin J                                                                                                                    | $\alpha X_4$  | $\alpha OMe$ | $\alpha OAc$ | $\alpha OH$  | H             | —                  |                             |                                                             |
| 110 | caseargrewiin K                                                                                                                    | $\alpha X_4$  | $\alpha OMe$ | $\alpha OAc$ | $\alpha OH$  | $\beta OH$    | —                  |                             |                                                             |
| 111 | caseargrewiin L                                                                                                                    | $\alpha Y_2$  | $\alpha OAc$ | $\alpha OAc$ | $\alpha OH$  | H             | —                  |                             |                                                             |
| 112 | <i>rel-2<math>\alpha</math>-hydroxyzuelanin-6<math>\beta</math>-cinnamate</i>                                                      | $\alpha OH$   | $\beta OAc$  | $\alpha OAc$ | $\beta OCin$ | H             | Me                 | <i>Zuelania guidonia</i>    | <i>Phytochemistry</i> , 1990, <b>29</b> , 1609-1614         |
| 113 | <i>rel-6<math>\beta</math>-hydroxyzuelanin-2<math>\alpha</math>-cinnamate</i>                                                      | $\alpha OCin$ | $\beta OAc$  | $\alpha OAc$ | $\beta OH$   | H             | Me                 |                             |                                                             |
| 114 | <i>rel-2<math>\beta</math>-hydroxyzuelanin-6<math>\beta</math>-cinnamate</i>                                                       | $\beta OH$    | $\beta OAc$  | $\alpha OAc$ | $\beta OCin$ | H             | Me                 |                             |                                                             |
| 115 | casearlucin A                                                                                                                      | $\beta Y_1$   | $\beta OAc$  | $\beta OAc$  | $\beta OH$   | H             | Me                 | <i>Casearia lucida</i>      | <i>J. Nat. Prod.</i> , 2002, <b>65</b> , 100-107            |
| 116 | casearlucin C                                                                                                                      | $\beta Y_1$   | $\beta OAc$  | $\beta OAc$  | $\beta OAc$  | H             | Me                 |                             |                                                             |
| 117 | casearlucin F                                                                                                                      | $\beta Y_1$   | $\beta OAc$  | $\beta OAc$  | H            | H             | Me                 |                             |                                                             |
| 118 | casearlucin G                                                                                                                      | $\alpha Y_1$  | $\beta OAc$  | $\beta OAc$  | H            | H             | Me                 |                             |                                                             |
| 119 | caseamembrol A                                                                                                                     | $\alpha Y_1$  | $\beta OAc$  | $\beta OAc$  | $\beta OH$   | H             | Me                 | <i>Casearia membranacea</i> | <i>Chem. Pharm. Bull.</i> , 2004, <b>52</b> , 108-110       |
| 120 | <i>6<math>\beta</math>-hydroxyzuelanin-2<math>\alpha</math>-acetate</i>                                                            | $\alpha OAc$  | $\beta OAc$  | $\alpha OAc$ | $\beta OH$   | H             | Me                 | <i>Zuelania guidonia</i>    | <i>Phytochemistry</i> , 1990, <b>29</b> , 2939-2942         |
| 121 | <i>6<math>\beta</math>-hydroxyzuelanin-2<math>\alpha</math>-<i>n</i>-octacetate</i>                                                | $\alpha OOct$ | $\beta OAc$  | $\alpha OAc$ | $\beta OH$   | H             | Me                 |                             |                                                             |
| 122 | <i>6<math>\beta</math>-hydroxyzuelanin-2<math>\beta</math>-<i>n</i>-octacetate</i>                                                 | $\beta OOct$  | $\beta OAc$  | $\alpha OAc$ | $\beta OH$   | H             | Me                 |                             |                                                             |
| 123 | <i>6<math>\beta</math>-hydroxyzuelanin-2<math>\beta</math>-<i>n</i>-benzoate</i>                                                   | $\beta OBz$   | $\beta OAc$  | $\alpha OAc$ | $\beta OH$   | H             | Me                 |                             |                                                             |
| 124 | <i>2<math>\alpha</math>-hydroxyzuelanin-6<math>\beta</math>-<i>n</i>-benzoate</i>                                                  | $\alpha OH$   | $\beta OAc$  | $\alpha OAc$ | $\beta OBz$  | H             | Me                 |                             |                                                             |
| 125 | <i>2<math>\alpha</math>-hydroxyzuelanin-6<math>\beta</math>-<i>n</i>-(3-hydroxy)-octanoate</i>                                     | $\alpha OH$   | $\beta OAc$  | $\alpha OAc$ | $\beta X_8$  | H             | Me                 |                             |                                                             |
| 126 | <i>zuelanin-2<math>\beta</math>-benzoate</i>                                                                                       | $\beta OBz$   | $\beta OAc$  | $\alpha OAc$ | H            | H             | Me                 |                             |                                                             |
| 127 | caseobliquin A                                                                                                                     | $\alpha OAc$  | $\beta OAc$  | $\alpha OAc$ | $\beta Z_1$  | H             | Me                 | <i>Casearia obliqua</i>     | <i>J. Nat. Prod.</i> , 2009, <b>72</b> , 1847-1850          |
| 128 | caseobliquin B                                                                                                                     | $\beta OAc$   | $\beta OAc$  | $\alpha OAc$ | $\beta OCin$ | H             | Me                 |                             |                                                             |
| 129 | <i>rel-18(S),19(R)-diacetoxo-18,19-epoxy-2(R),7(S),16-trihydroxy-6(S)-myristoyloxy-5(R),8(R),9(S),10(R)-cleroda-3,12,14-triene</i> | $\beta OH$    | $\beta OAc$  | $\beta OAc$  | $\beta OMyr$ | $\alpha OH$   | CH <sub>2</sub> OH | <i>Laetia procera</i>       | <i>Phytochemistry</i> , 1996, <b>43</b> , 635-638           |
| 130 | <i>rel-18(S),19(R)-diacetoxo-18,19-epoxy-2(R),7(S),16-trihydroxy-6(S)-palmitoyloxy-5(R),8(R),9(S),10(R)-cleroda-3,12,14-triene</i> | $\beta OH$    | $\beta OAc$  | $\beta OAc$  | $\beta OPal$ | $\alpha OH$   | CH <sub>2</sub> OH |                             |                                                             |
| 131 | <i>rel-18(S),19(R)-diacetoxo-18,19-epoxy-2(R),6(S),16-trihydroxy-7(S)-myristoyloxy-5(R),8(R),9(S),10(R)-cleroda-3,12,14-triene</i> | $\beta OH$    | $\beta OAc$  | $\beta OAc$  | $\beta OH$   | $\alpha OMyr$ | CH <sub>2</sub> OH |                             |                                                             |
| 132 | <i>rel-18(S),19(R)-diacetoxo-18,19-epoxy-2(R),7(S),16-trihydroxy-6(S)-palmitoyloxy-5(R),8(R),9(S),10(R)-cleroda-3,12,14-triene</i> | $\beta OH$    | $\beta OAc$  | $\beta OAc$  | $\beta OH$   | $\alpha OPal$ | CH <sub>2</sub> OH |                             |                                                             |
| 133 | bucidarasin A                                                                                                                      | $\beta OiBu$  | $\beta OAc$  | $\beta OAc$  | $\beta OH$   | H             | Me                 | <i>Bucida buceras</i>       | <i>Bioorg. Med. Chem. Lett.</i> , 2002, <b>12</b> , 345-348 |
| 134 | bucidarasin B                                                                                                                      | $\beta Y_1$   | $\beta OAc$  | $\beta OAc$  | $\beta OH$   | H             | Me                 |                             |                                                             |
| 135 | bucidarasin C                                                                                                                      | $\beta OiBu$  | $\beta OAc$  | $\beta OAc$  | H            | H             | Me                 |                             |                                                             |

### 1.1.3. Type I Subtype Ic with Other Skeletons (Table 4)

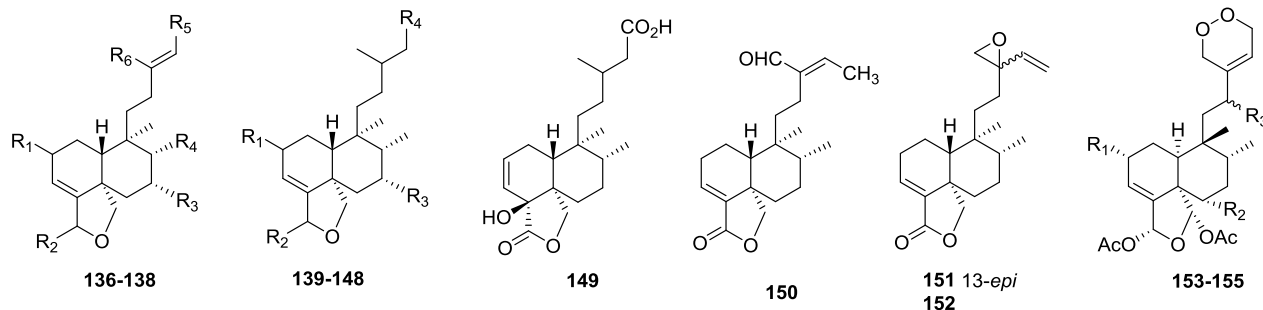

| No. | Compound Name                                                                | R <sub>1</sub> | R <sub>2</sub> | R <sub>3</sub> | R <sub>4</sub>       | R <sub>5</sub>       | R <sub>6</sub> | Source                     | Ref.                                                |
|-----|------------------------------------------------------------------------------|----------------|----------------|----------------|----------------------|----------------------|----------------|----------------------------|-----------------------------------------------------|
| 136 | 15-malonyloxy- <i>ent</i> -cleroda-3,13 <i>E</i> -dien-18,19-olide           | H              | =O             | H              | Me                   | CH <sub>2</sub> OMal | Me             | <i>Olearia teretifolia</i> | <i>Phytochemistry</i> , 1992, <b>31</b> , 1703-1711 |
| 137 | 18,19-epoxy-18β-methoxy- <i>ent</i> -cleroda-3,13 <i>E</i> -dien-15-oic acid | H              | βOMe           | H              | Me                   | CO <sub>2</sub> H    | Me             |                            |                                                     |
| 138 | 18,19-epoxy-18α-methoxy- <i>ent</i> -cleroda-3,13 <i>E</i> -dien-15-oic acid | H              | αOMe           | H              | Me                   | CO <sub>2</sub> H    | Me             |                            |                                                     |
| 139 | <i>ent</i> -clerod-3-en-15-oic acid-18,19-olide                              | H              | =O             | H              | CO <sub>2</sub> H    | —                    | —              |                            |                                                     |
| 140 | 15-malonyloxy- <i>ent</i> -clerod-3-en-18,19-olide                           | H              | =O             | H              | CH <sub>2</sub> OMal | —                    | —              |                            |                                                     |
| 141 | 7α-hydroxy- <i>ent</i> -clerod-3-en-15-oic acid-18, 19-olide                 | H              | =O             | OH             | CO <sub>2</sub> H    | —                    | —              |                            |                                                     |
| 142 | 15-malonyloxy-7α-hydroxy- <i>ent</i> -clerod-3-en-18,19-olide                | H              | =O             | OH             | CH <sub>2</sub> OMal | —                    | —              |                            |                                                     |
| 143 | 2α-hydroxy- <i>ent</i> -cleroda-3-en-15-oic acid-18,19-olide                 | αOH            | =O             | H              | CO <sub>2</sub> H    | —                    | —              |                            |                                                     |
| 144 | 2β-hydroxy- <i>ent</i> -clerod-3-en-15-oic acid-18,19-olide                  | βOH            | =O             | H              | CO <sub>2</sub> H    | —                    | —              |                            |                                                     |
| 145 | 15-hydroxy- <i>ent</i> -clerod-3-en-18,19-olide                              | H              | =O             | H              | CH <sub>2</sub> OH   | —                    | —              |                            |                                                     |
| 146 | 7α,15-dihydroxy- <i>ent</i> -clerod-3-en-18,19-olide                         | H              | =O             | OH             | CH <sub>2</sub> OH   | —                    | —              |                            |                                                     |
| 147 | 18,19-epoxy-18β-methoxy- <i>ent</i> -clerod-3-en-15-oic acid                 | H              | βOMe           | H              | CO <sub>2</sub> H    | —                    | —              |                            |                                                     |
| 148 | 18,19-epoxy-18α-methoxy- <i>ent</i> -clerod-3-en-15-oic acid                 | H              | αOMe           | H              | CO <sub>2</sub> H    | —                    | —              |                            |                                                     |
| 149 | 4β-hydroxy- <i>ent</i> -clerod-2-en-15-oic acid-18,19-olide                  | —              | —              | —              | —                    | —                    | —              |                            |                                                     |
| 150 | baclinal                                                                     | —              | —              | —              | —                    | —                    | —              | <i>Baccharis linearis</i>  | <i>Phytochemistry</i> , 1996, <b>41</b> , 1123-1127 |
| 151 | 13- <i>epi</i> -baclinepoxide                                                | —              | —              | —              | —                    | —                    | —              |                            |                                                     |
| 152 | baclinepoxide                                                                | —              | —              | —              | —                    | —                    | —              | <i>Zuelania guidonia</i>   | <i>J. Nat. Prod.</i> , 2014, <b>77</b> , 455-463    |
| 153 | zuelaguidin E                                                                | OH             | OCin           | H              | —                    | —                    | —              |                            |                                                     |
| 154 | zuelaguidin G                                                                | Dc             | OXYl           | βOH            | —                    | —                    | —              |                            |                                                     |
| 155 | zuelaguidin H                                                                | Dc             | OXYl           | αOH            | —                    | —                    | —              |                            |                                                     |



## 1.2. Type I Subtype II with a Double Bond Between C-3 and C-4 or Another Position

### 1.2.1. Type I Subtype IIa with a Double Bond between C-3 and C-4 (Table 5)

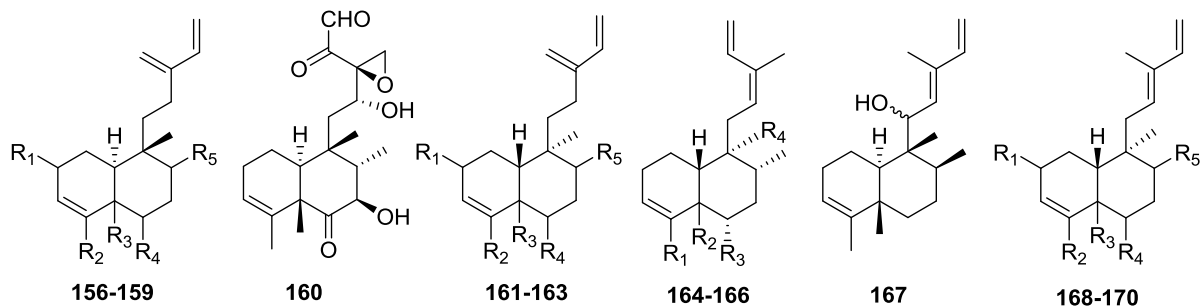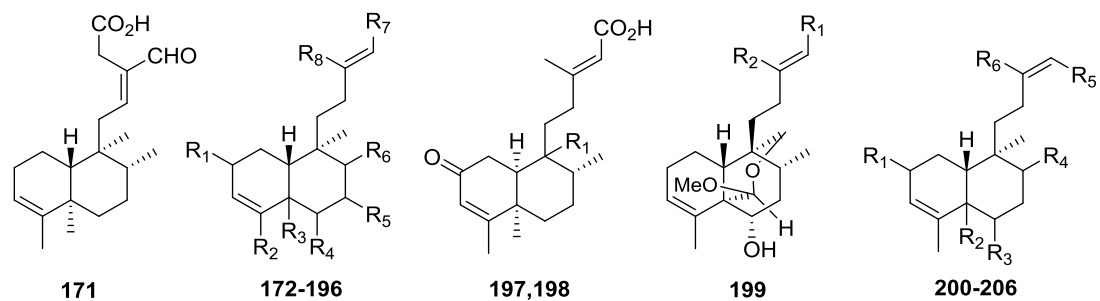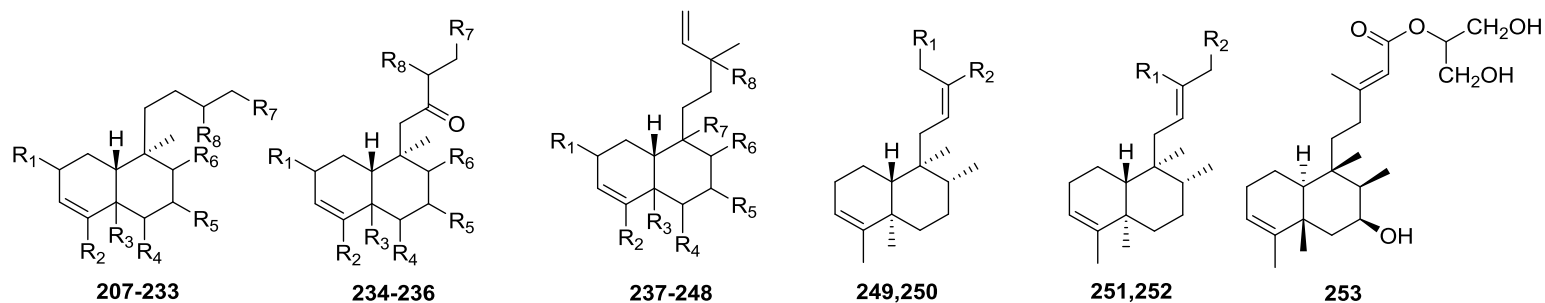

| No. | Compound Name                                                                                      | R <sub>1</sub> | R <sub>2</sub>     | R <sub>3</sub> | R <sub>4</sub> | R <sub>5</sub> | R <sub>6</sub> | R <sub>7</sub> | R <sub>8</sub> | Source                    | Ref.                                                |
|-----|----------------------------------------------------------------------------------------------------|----------------|--------------------|----------------|----------------|----------------|----------------|----------------|----------------|---------------------------|-----------------------------------------------------|
| 156 | 2-oxo-18-hydroxy-10 $\alpha$ ,17 $\alpha$ ,19 $\alpha$ ,20 $\beta$ -(-)-cleroda-3,13(16),14-triene | =O             | CH <sub>2</sub> OH | $\alpha$ Me    | H              | $\alpha$ Me    | —              | —              | —              | <i>Casearia corymbosa</i> | <i>Phytochemistry</i> , 1990, <b>29</b> , 3591-3595 |

|     |                                                                                                         |                         |                     |                              |                   |                             |                             |                    |    |                                           |                                                             |
|-----|---------------------------------------------------------------------------------------------------------|-------------------------|---------------------|------------------------------|-------------------|-----------------------------|-----------------------------|--------------------|----|-------------------------------------------|-------------------------------------------------------------|
| 157 | 2-oxo-18,19-diacetoxy-10 $\alpha$ ,17 $\alpha$ ,19 $\alpha$ ,20 $\beta$ -(-)-cleroda-3,13(16),14-triene | =O                      | CH <sub>2</sub> OAc | $\alpha$ CH <sub>2</sub> OAc | H                 | $\alpha$ Me                 | —                           | —                  | —  |                                           |                                                             |
| 158 | balanspene H                                                                                            | $\alpha$ Y <sub>1</sub> | CHO                 | $\alpha$ CHO                 | $\alpha$ OMe      | $\alpha$ Me                 | —                           | —                  | —  | <i>Casearia balansae</i>                  | <i>J. Nat. Prod.</i> , 2014, <b>77</b> , 2182–2189          |
| 159 | terpentetriene                                                                                          | H                       | Me                  | $\beta$ Me                   | H                 | $\alpha$ Me                 | —                           | —                  | —  | <i>Streptomyces lividans</i> transformant | <i>J. Bacteriol.</i> , 2001, <b>183</b> , 6085-6094         |
| 160 | terpentecin                                                                                             | —                       | —                   | —                            | —                 | —                           | —                           | —                  | —  | <i>Streptomyces griseolosporeus</i>       |                                                             |
| 161 | ent-clerod-3,13(16),14-triene                                                                           | H                       | Me                  | $\alpha$ Me                  | H                 | $\alpha$ Me                 | —                           | —                  | —  | <i>Jungermannia infusca</i>               | <i>Phytochemistry</i> , 1998, <b>49</b> , 601-608           |
| 162 | ent-clerod-3,13(16),14-triene-17-ol                                                                     | H                       | Me                  | $\alpha$ Me                  | H                 | $\alpha$ CH <sub>2</sub> OH | —                           | —                  | —  |                                           |                                                             |
| 163 | caseamembrin F                                                                                          | $\beta$ Y <sub>1</sub>  | CHO                 | $\beta$ CHO                  | $\beta$ OH        | $\beta$ Me                  | —                           | —                  | —  | <i>Casearia membranacea</i>               | <i>J. Nat. Prod.</i> , 2004, <b>67</b> , 316-321            |
| 164 | (-)-3,12Z,14-cis-clerodatrien-18-oic acid                                                               | CO <sub>2</sub> H       | $\beta$ Me          | H                            | Me                | —                           | —                           | —                  | —  | <i>Schistochila acuminata</i>             | <i>J. Chin. Chem. Soc.</i> , 1992, <b>39</b> , 263-266      |
| 165 | heteroscyphic acid A                                                                                    | Me                      | $\alpha$ Me         | H                            | CO <sub>2</sub> H | —                           | —                           | —                  | —  | <i>Heteroscyphus planus</i>               | <i>Phytochemistry</i> , 1994, <b>37</b> , 1263-1268         |
| 166 | heteroscyphic acid B                                                                                    | Me                      | $\alpha$ Me         | OAc                          | CO <sub>2</sub> H | —                           | —                           | —                  | —  |                                           |                                                             |
| 167 | heteroscyphol                                                                                           | —                       | —                   | —                            | —                 | —                           | —                           | —                  | —  |                                           | <i>Phytochemistry</i> , 1995, <b>38</b> , 119-127           |
| 168 | 6 $\alpha$ -hydroxy-3,12E,14-clerodatriene                                                              | H                       | Me                  | $\alpha$ Me                  | $\alpha$ OH       | $\alpha$ Me                 | —                           | —                  | —  | <i>Heteroscyphus billardieri</i>          | <i>Chem. Pharm. Bull.</i> , 2004, <b>52</b> , 556-560       |
| 169 | (-)-3,12E,14-cis-clerodatrien-18-oic acid                                                               | H                       | CO <sub>2</sub> H   | $\beta$ Me                   | H                 | $\alpha$ Me                 | —                           | —                  | —  | <i>Schistochila acuminata</i>             | <i>J. Chin. Chem. Soc.</i> , 1992, <b>39</b> , 263-266      |
| 170 | bucidasin D                                                                                             | =O                      | CH <sub>2</sub> OAc | $\beta$ CH <sub>2</sub> OAc  | H                 | $\beta$ Me                  | —                           | —                  | —  | <i>Bucida buceras</i>                     | <i>Bioorg. Med. Chem. Lett.</i> , 2002, <b>12</b> , 345-348 |
| 171 | 3,12E-kolavadien-15-oic acid-16-al                                                                      | —                       | —                   | —                            | —                 | —                           | —                           | —                  | —  | <i>Polyalthia viridis</i>                 | <i>Phytochemistry</i> , 1993, <b>34</b> , 457-460           |
| 172 | 18,19-dihydroxy-ent-cleroda-3,13E-dien-15-oic acid                                                      | H                       | CH <sub>2</sub> OH  | $\alpha$ CH <sub>2</sub> OH  | H                 | H                           | $\alpha$ Me                 | CO <sub>2</sub> H  | Me | <i>Olearia teretifolia</i>                | <i>Phytochemistry</i> , 1992, <b>31</b> , 1703-1711         |
| 173 | platypodiol                                                                                             | H                       | Me                  | $\alpha$ Me                  | $\beta$ OH        | H                           | $\alpha$ CH <sub>2</sub> OH | CH <sub>2</sub> OH | Me | <i>Baccharis platypoda</i>                | <i>Tetrahedron Lett.</i> , 2014, <b>55</b> , 4898-4900      |
| 174 | 17-hydroxy-3,13E-clerodadien-15-al                                                                      | H                       | Me                  | $\alpha$ Me                  | H                 | H                           | $\alpha$ CH <sub>2</sub> OH | CHO                | Me | <i>Jungermannia infusca</i>               | <i>Chem. Pharm. Bull.</i> , 2000, <b>48</b> , 1818-1821     |
| 175 | 6 $\alpha$ ,7 $\alpha$ -dihydroxykolavenol                                                              | H                       | Me                  | $\alpha$ Me                  | $\alpha$ OH       | $\alpha$ OH                 | $\alpha$ Me                 | CH <sub>2</sub> OH | Me | <i>Ptychopetalum olacoides</i>            | <i>Nat. Prod. Commun.</i> , 2011, <b>6</b> , 327-332        |
| 176 | 2 $\beta$ -acetoxy-19-carboxymethyl-cleroda-3,13-dien-15-oic acid                                       | $\beta$ OAc             | CO <sub>2</sub> Me  | $\alpha$ Me                  | H                 | H                           | $\alpha$ Me                 | CO <sub>2</sub> H  | Me | <i>Scapania bolandeli</i>                 | <i>Phytochemistry</i> , 1999, <b>52</b> , 1551-1553         |
| 177 | deserticolic acid                                                                                       | H                       | Me                  | $\beta$ CH <sub>2</sub> OH   | H                 | H                           | $\alpha$ Me                 | CO <sub>2</sub> H  | Me | <i>Haplopappus deserticola</i>            | <i>Phytochemistry</i> , 1999, <b>52</b> , 1531-1533         |
| 178 | —                                                                                                       | =O                      | Me                  | $\alpha$ Me                  | H                 | $\alpha$ OAc                | $\alpha$ Me                 | CO <sub>2</sub> Me | Me | <i>Solidago altissima</i>                 | <i>Phytochemistry</i> , 1999, <b>52</b> , 487-493           |

|     |                                                                            |                    |                     |                     |                     |                   |                    |                    |                    |                                  |                                                          |
|-----|----------------------------------------------------------------------------|--------------------|---------------------|---------------------|---------------------|-------------------|--------------------|--------------------|--------------------|----------------------------------|----------------------------------------------------------|
| 179 | —                                                                          | βOH                | Me                  | αMe                 | H                   | αOAc              | αMe                | CO <sub>2</sub> Me | Me                 |                                  |                                                          |
| 180 | —                                                                          | αOH                | Me                  | αMe                 | H                   | H                 | αMe                | CO <sub>2</sub> Me | Me                 |                                  |                                                          |
| 181 | —                                                                          | βOH                | Me                  | αMe                 | H                   | H                 | αMe                | CO <sub>2</sub> Me | Me                 |                                  |                                                          |
| 182 | diastereoisomer of kolavenol                                               | H                  | Me                  | αMe                 | H                   | H                 | βMe                | CH <sub>2</sub> OH | Me                 | <i>Entada abyssinica</i>         | <i>J. Ethnopharmacol.</i> , 1998, <b>61</b> , 179-183    |
| 183 | 16-oxo- <i>ent</i> -cleroda-3,13Z-diene-15,17-dioic acid                   | H                  | Me                  | αMe                 | H                   | H                 | αCO <sub>2</sub> H | CO <sub>2</sub> H  | CHO                | <i>Diplostephium floribundum</i> | <i>Phytochemistry</i> , 1992, <b>31</b> , 213-216        |
| 184 | 15-oxo- <i>ent</i> -cleroda-3,13Z-diene-16,17-dioic acid                   | H                  | Me                  | αMe                 | H                   | H                 | αCO <sub>2</sub> H | CHO                | CO <sub>2</sub> H  |                                  |                                                          |
| 185 | 2α-acetoxy-15-oxo- <i>ent</i> -cleroda-3,13Z-diene-16,17-dioic acid        | αOAc               | Me                  | αMe                 | H                   | H                 | αCO <sub>2</sub> H | CHO                | CO <sub>2</sub> H  |                                  |                                                          |
| 186 | 7-oxo- <i>ent</i> -clerodan-3,13E-dien-15-oic acid                         | H                  | Me                  | αMe                 | H                   | =O                | αMe                | CO <sub>2</sub> H  | Me                 | <i>Platychaete aucheri</i>       | <i>Phytochemistry</i> , 1990, <b>29</b> , 985-987        |
| 187 | 6α-hydroxy-7-oxo- <i>ent</i> -clerodane-3,13E-dien-15-oic acid             | H                  | Me                  | αMe                 | αOH                 | =O                | αMe                | CO <sub>2</sub> H  | Me                 |                                  |                                                          |
| 188 | crotonic acid                                                              | H                  | CH <sub>2</sub> OAc | βMe                 | H                   | H                 | αMe                | CO <sub>2</sub> H  | Me                 | <i>Croton chilensis</i>          | <i>Bol. Soc. Chil. Quim.</i> , 1995, <b>40</b> , 157-162 |
| 189 | polyalthialdoic acid                                                       | H                  | Me                  | αMe                 | H                   | H                 | αMe                | CO <sub>2</sub> H  | CHO                | <i>Polyalthia longifolia</i>     | <i>Planta Med.</i> , 1991, <b>57</b> , 380-383           |
| 190 | 18-hydroxy-5,10- <i>trans</i> -cleroda-3,13E-dien-15-oic acid methyl ester | H                  | CH <sub>2</sub> OH  | αMe                 | H                   | H                 | αMe                | CO <sub>2</sub> Me | Me                 | <i>Heteroscyphus planus</i>      | <i>Phytochemistry</i> , 1996, <b>41</b> , 581-587        |
| 191 | pilosanol A                                                                | H                  | Me                  | αCH <sub>2</sub> OH | αOH                 | H                 | αMe                | CH <sub>2</sub> OH | CH <sub>2</sub> OH | <i>Portulaca pilosa</i>          | <i>Phytochemistry</i> , 1991, <b>30</b> , 4075-4077      |
| 192 | pilosanol B                                                                | H                  | CH <sub>2</sub> OH  | αCH <sub>2</sub> OH | αOH                 | H                 | αMe                | CH <sub>2</sub> OH | CH <sub>2</sub> OH |                                  |                                                          |
| 193 | methyl(13E)-2-oxo-neocleroda-3,13-dien-15-oate                             | =O                 | Me                  | αMe                 | H                   | H                 | αMe                | CO <sub>2</sub> Me | Me                 | <i>Amoora yunnanensis</i>        | <i>Helv. Chim. Acta</i> , 2004, <b>87</b> , 1279-1286.   |
| 194 | (13E)-2-oxoneocleroda-3,13-dien-15-ol                                      | =O                 | Me                  | αMe                 | H                   | H                 | αMe                | CH <sub>2</sub> OH | Me                 |                                  |                                                          |
| 195 | (-)-(5R,8S,9S,10R)-cleroda-3,13E-dien-15-oic acid                          | H                  | Me                  | αMe                 | H                   | H                 | βMe                | CO <sub>2</sub> H  | Me                 | <i>Hymenaea courbaril</i>        | <i>Phytochemistry</i> , 2001, <b>58</b> , 1153-1157      |
| 196 | methyl (5S,8S,9S,10R)-cleroda-3,13E-dien-15-oate                           | H                  | Me                  | βMe                 | H                   | H                 | βMe                | CO <sub>2</sub> Me | Me                 |                                  |                                                          |
| 197 | 5α,8α-2-oxokolavenic acid                                                  | βMe                | —                   | —                   | —                   | —                 | —                  | —                  | —                  | <i>Detarium microcarpum</i>      | <i>J. Nat. Prod.</i> , 2006, <b>69</b> , 768-773         |
| 198 | (13E)-2-oxo-5α- <i>cis</i> -17α,20α-cleroda-3,13-diene-15-oic acid         | αMe                | —                   | —                   | —                   | —                 | —                  | —                  | —                  | <i>Eperua purpurea</i>           | <i>Phytochemistry</i> , 1991, <b>30</b> , 3474-3475      |
| 199 | portulene acetal                                                           | CH <sub>2</sub> OH | CH <sub>2</sub> OH  | —                   | —                   | —                 | —                  | —                  | —                  | <i>Portulaca grandiflora</i>     | <i>J. Nat. Prod.</i> , 1997, <b>60</b> , 912-914         |
| 200 | solidagocanin A                                                            | H                  | αMe                 | βOTig               | αMe                 | CO <sub>2</sub> H | Me                 | —                  | —                  | <i>Solidago canadensis</i>       | <i>Helv. Chim. Acta</i> , 2012, <b>95</b> , 1121-1125    |
| 201 | solidagocanin B                                                            | H                  | αMe                 | βOAng               | αMe                 | CO <sub>2</sub> H | Me                 | —                  | —                  |                                  |                                                          |
| 202 | 17-hydroxy-3,13Z-clerodadien-15-al                                         | H                  | αMe                 | H                   | αCH <sub>2</sub> OH | CHO               | Me                 | —                  | —                  | <i>Jungermannia infusca</i>      | <i>Chem. Pharm. Bull.</i> , 2000, <b>48</b> , 1818-1821  |

|     |                                                                                  |              |                             |                               |                             |                   |             |                         |                     |                                 |                                                      |
|-----|----------------------------------------------------------------------------------|--------------|-----------------------------|-------------------------------|-----------------------------|-------------------|-------------|-------------------------|---------------------|---------------------------------|------------------------------------------------------|
| 203 | PMS-1                                                                            | H            | $\alpha$ Me                 | H                             | $\alpha$ CH <sub>2</sub> OH | Me                | Me          | —                       | —                   | <i>Brazilian propolis</i>       | <i>Anticancer Res.</i> , 1996, <b>16</b> , 2669-2672 |
| 204 | 16-oxo-cleroda-3,13(14) <i>E</i> -diene-15-oic acid                              | H            | $\alpha$ Me                 | H                             | $\alpha$ Me                 | CO <sub>2</sub> H | CHO         | —                       | —                   | <i>Polyalthia longifolia</i>    | <i>Fitoterapia</i> , 2005, <b>76</b> , 336-339       |
| 205 | 2 $\alpha$ -hydroxy- <i>cis</i> -cleroda-3,13( <i>Z</i> ),8,17-trien-15-oic acid | $\alpha$ OH  | $\beta$ Me                  | H                             | =CH <sub>2</sub>            | CO <sub>2</sub> H | Me          | —                       | —                   | <i>Haplopappus foliosus</i>     | <i>Planta Med.</i> , 2003, <b>69</b> , 675-677       |
| 206 | 2 $\alpha$ -acetoxy- <i>cis</i> -cleroda-3,13( <i>Z</i> ),8,17-trien-15-oic acid | $\alpha$ OAc | $\beta$ Me                  | H                             | =CH <sub>2</sub>            | CO <sub>2</sub> H | Me          | —                       | —                   |                                 |                                                      |
| 207 | trinerdiol                                                                       | H            | CH <sub>2</sub> OH          | $\alpha$ Me                   | H                           | H                 | $\alpha$ Me | CH <sub>2</sub> OH      | Me                  | <i>Baccharis trinervis</i>      | <i>Phytochemistry</i> , 1993, <b>34</b> , 1377-1384  |
| 208 | 15-acetyl-trinerdiol                                                             | H            | CH <sub>2</sub> OH          | $\alpha$ Me                   | H                           | H                 | $\alpha$ Me | CH <sub>2</sub> OA<br>c | Me                  |                                 |                                                      |
| 209 | 18-acetyl-trinerdiol                                                             | H            | CH <sub>2</sub> OAc         | $\alpha$ Me                   | H                           | H                 | $\alpha$ Me | CH <sub>2</sub> OH      | Me                  |                                 |                                                      |
| 210 | 18-methylmalonyl-trinerdiol                                                      | H            | CH <sub>2</sub> OMe-<br>Mal | $\alpha$ Me                   | H                           | H                 | $\alpha$ Me | CH <sub>2</sub> OH      | Me                  |                                 |                                                      |
| 211 | 15,18-diacetyl-triner-triol                                                      | H            | CH <sub>2</sub> OAc         | $\alpha$ Me                   | H                           | H                 | $\alpha$ Me | CH <sub>2</sub> OA<br>c | CH <sub>2</sub> OH  |                                 |                                                      |
| 212 | 14,15,18-triacetyl-trinertetrol                                                  | H            | CH <sub>2</sub> OAc         | $\alpha$ Me                   | H                           | $\alpha$ OH       | $\alpha$ Me | CH <sub>2</sub> OA<br>c | CH <sub>2</sub> OAc |                                 |                                                      |
| 213 | 15,16-diacetyl-trinertriol                                                       | H            | CH <sub>2</sub> OH          | $\alpha$ Me                   | H                           | H                 | $\alpha$ Me | CH <sub>2</sub> OA<br>c | CH <sub>2</sub> OAc |                                 |                                                      |
| 214 | 15-hydroxy-16-acetoxy- <i>ent</i> -clerod-3- <i>en</i> -18-oic acid              | H            | CO <sub>2</sub> H           | $\alpha$ Me                   | H                           | H                 | $\alpha$ Me | CH <sub>2</sub> OH      | CH <sub>2</sub> OAc | <i>Baccharis gaudichaudiana</i> | <i>Chem Pharm Bull</i> , 2007, <b>55</b> , 1532-1534 |
| 215 | 19-hydroxykovalic acid                                                           | H            | CO <sub>2</sub> H           | $\alpha$ CH <sub>2</sub> OH   | H                           | H                 | $\alpha$ Me | CO <sub>2</sub> H       | Me                  | <i>Olearia teretifolia</i>      | <i>Phytochemistry</i> , 1992, <b>31</b> , 1703-1711  |
| 216 | 18-oxo-19-seneciyl-oxy- <i>ent</i> -clerod-3- <i>en</i> -15-oic acid             | H            | CHO                         | $\alpha$ CH <sub>2</sub> OSen | H                           | H                 | $\alpha$ Me | CO <sub>2</sub> H       | Me                  |                                 |                                                      |
| 217 | 18-oxo- <i>ent</i> -clerod-3- <i>en</i> -15,19-dioic acid                        | H            | CHO                         | $\alpha$ CO <sub>2</sub> H    | H                           | H                 | $\alpha$ Me | CO <sub>2</sub> H       | Me                  |                                 |                                                      |
| 218 | 15,19-dihydroxy- <i>ent</i> -clerod-3- <i>en</i> -18-oic acid                    | H            | CO <sub>2</sub> H           | $\alpha$ CH <sub>2</sub> OH   | H                           | H                 | $\alpha$ Me | CH <sub>2</sub> OH      | Me                  |                                 |                                                      |
| 219 | 15,18,19-trihydroxy- <i>ent</i> -clerod-3- <i>ene</i>                            | H            | CH <sub>2</sub> OH          | $\alpha$ CH <sub>2</sub> OH   | H                           | H                 | $\alpha$ Me | CH <sub>2</sub> OH      | Me                  |                                 |                                                      |
| 220 | 18,19-dihydroxyclerod-3- <i>en</i> -15-oic acid                                  | H            | CH <sub>2</sub> OH          | $\alpha$ CH <sub>2</sub> OH   | H                           | H                 | $\alpha$ Me | CO <sub>2</sub> H       | $\beta$ Me          | <i>Chrysocoma comaurea</i>      | <i>Phytochemistry</i> , 1991, <b>30</b> , 607-609    |
| 221 | 7-oxo-13,14-dihydrokolavenic acid                                                | H            | Me                          | $\alpha$ Me                   | H                           | =O                | $\alpha$ Me | CO <sub>2</sub> H       | Me                  | <i>Pteronia camphorata</i>      | <i>Phytochemistry</i> , 1990, <b>29</b> , 1231-1245  |
| 222 | 6 $\alpha$ -hydroxy-7-oxo-13,14-dihydrokolavenic acid                            | H            | Me                          | $\alpha$ Me                   | $\alpha$ OH                 | =O                | $\alpha$ Me | CO <sub>2</sub> H       | Me                  |                                 |                                                      |
| 223 | 6 $\alpha$ -angloyloxy-7-oxo-13,14-dihydrokolavenic acid                         | H            | Me                          | $\alpha$ Me                   | $\alpha$ OAng               | =O                | $\alpha$ Me | CO <sub>2</sub> H       | Me                  |                                 |                                                      |

|     |                                                                                   |              |                                |             |                                |              |             |                    |                  |                                   |                                                        |
|-----|-----------------------------------------------------------------------------------|--------------|--------------------------------|-------------|--------------------------------|--------------|-------------|--------------------|------------------|-----------------------------------|--------------------------------------------------------|
| 224 | 6 $\alpha$ -isobutyryloxy-7-oxo-13,14-dihydrokolavenic acid                       | H            | Me                             | $\alpha$ Me | $\alpha$ OiBu                  | =O           | $\alpha$ Me | CO <sub>2</sub> H  | Me               |                                   |                                                        |
| 225 | <i>epi</i> -populifolic acid                                                      | H            | Me                             | $\beta$ Me  | H                              | H            | $\alpha$ Me | CO <sub>2</sub> H  | Me               | <i>Aristolochia cymbifera</i>     | <i>Phytochemistry</i> , 1992, <b>31</b> , 3277-3279    |
| 226 | 18-acetoxy- <i>cis</i> -cleroda-3-en-15-oic acid                                  | H            | CH <sub>2</sub> OAc            | $\beta$ Me  | H                              | H            | $\beta$ Me  | CO <sub>2</sub> H  | Me               | <i>Haplopappus uncinatus</i>      | <i>J. Ethnopharmacol.</i> , 2006, <b>103</b> , 297-301 |
| 227 | (13 <i>S</i> )- <i>ent</i> -7 $\beta$ -hydroxy-3-cleroden-15-oic acid             | H            | Me                             | $\alpha$ Me | H                              | $\alpha$ OH  | $\alpha$ Me | CO <sub>2</sub> H  | $\beta$ Me       |                                   |                                                        |
| 228 | <i>ent</i> -7 $\beta$ -hydroxy-2-oxo-3-cleroden-15-oic acid                       | =O           | Me                             | $\alpha$ Me | H                              | $\alpha$ OH  | $\alpha$ Me | CO <sub>2</sub> H  | $\beta$ Me       | <i>Nuxia sphaerocephala</i>       | <i>Phytochemistry</i> , 2006, <b>67</b> , 444-451      |
| 229 | <i>ent</i> -2,7-dioxo-3-clero-den-15-oic acid                                     | =O           | Me                             | $\alpha$ Me | H                              | =O           | $\alpha$ Me | CO <sub>2</sub> H  | $\beta$ Me       |                                   |                                                        |
| 230 | <i>ent</i> -18-( <i>E</i> )-caffeoyloxy-7 $\beta$ -hydroxy-3-cleroden-15-oic acid | H            | CH <sub>2</sub> Z <sub>4</sub> | $\alpha$ Me | H                              | $\alpha$ OH  | $\alpha$ Me | CO <sub>2</sub> H  | $\beta$ Me       |                                   |                                                        |
| 231 | 2 $\beta$ -(formyloxy)clerod-3-en-15-oic acid                                     | $\beta$ OCHO | Me                             | $\alpha$ Me | H                              | H            | $\alpha$ Me | CO <sub>2</sub> H  | Me               | <i>Clausena dunniana</i>          | <i>Helv. Chim. Acta.</i> , 2003, <b>86</b> , 3187-3193 |
| 232 | 2 $\beta$ -(acetyloxy)clerod-3-en-15-oic acid                                     | $\beta$ OAc  | Me                             | $\alpha$ Me | H                              | H            | $\alpha$ Me | CO <sub>2</sub> H  | Me               |                                   |                                                        |
| 233 | ethyl clerod-3-en-15-oate                                                         | H            | Me                             | $\alpha$ Me | H                              | H            | $\alpha$ Me | CO <sub>2</sub> Et | Me               |                                   |                                                        |
| 234 | premnone A                                                                        | H            | Me                             | $\alpha$ Me | $\alpha$ OCin ( <i>trans</i> ) | $\beta$ OH   | $\alpha$ Me | CO <sub>2</sub> Me | =CH <sub>2</sub> | <i>Premna tomentosa</i>           | <i>Phytochemistry</i> , 2006, <b>67</b> , 1243-1248    |
| 235 | premnone B                                                                        | H            | Me                             | $\alpha$ Me | $\alpha$ OCin ( <i>cis</i> )   | $\beta$ OH   | $\alpha$ Me | CO <sub>2</sub> Me | =CH <sub>2</sub> |                                   |                                                        |
| 236 | premnone C                                                                        | H            | Me                             | $\alpha$ Me | $\alpha$ OH                    | $\beta$ OCin | $\alpha$ Me | CO <sub>2</sub> Me | =CH <sub>2</sub> |                                   |                                                        |
| 237 | 7-oxo-kolavelool                                                                  | H            | Me                             | $\alpha$ Me | H                              | =O           | $\alpha$ Me | $\alpha$ Me        | $\alpha$ OH      | <i>Ptychopetalum olacoides</i>    | <i>Nat. Prod. Commun.</i> , 2011, <b>6</b> , 327-332   |
| 238 | 7 $\alpha$ -hydroxykolavelool                                                     | H            | Me                             | $\alpha$ Me | H                              | $\alpha$ OH  | $\alpha$ Me | $\alpha$ Me        | $\alpha$ OH      |                                   |                                                        |
| 239 | (-)-13- <i>epi</i> -2-oxo-kolavelool                                              | =O           | Me                             | $\alpha$ Me | H                              | H            | $\alpha$ Me | $\alpha$ Me        | $\beta$ OH       | <i>Aristolochia chamissonis</i>   | <i>Phytochemistry</i> , 1999, <b>50</b> , 455-461      |
| 240 | (-)-2 $\beta$ -hydroxykolavelool                                                  | $\beta$ OH   | Me                             | $\alpha$ Me | H                              | H            | $\alpha$ Me | $\alpha$ Me        | $\beta$ OH       |                                   |                                                        |
| 241 | (-)-2 $\beta$ -hydroperoxykolavelool                                              | $\beta$ OOH  | Me                             | $\alpha$ Me | H                              | H            | $\alpha$ Me | $\alpha$ Me        | $\beta$ OH       |                                   |                                                        |
| 242 | 13- <i>epi</i> -roseostachenol                                                    | $\alpha$ OH  | Me                             | $\alpha$ Me | H                              | H            | $\alpha$ Me | $\alpha$ Me        | $\beta$ OH       |                                   |                                                        |
| 243 | roseostachenol                                                                    | $\alpha$ OH  | Me                             | $\alpha$ Me | H                              | H            | $\alpha$ Me | $\alpha$ Me        | $\alpha$ OH      | <i>Stachys rosea</i>              | <i>Phytochemistry</i> , 1994, <b>37</b> , 501-503      |
| 244 | roseostachenone                                                                   | =O           | Me                             | $\alpha$ Me | H                              | H            | $\alpha$ Me | $\alpha$ Me        | OH               |                                   | <i>Phytochemistry</i> , 1992, <b>31</b> , 3147-3149    |
| 245 | 13-hydroxy- <i>cis-ent</i> -cleroda-3,14-diene                                    | H            | Me                             | $\beta$ Me  | H                              | H            | $\alpha$ Me | $\alpha$ Me        | OH               | <i>Adelanthus lindenbergianus</i> | <i>Phytochemistry</i> , 2004, <b>65</b> , 127-137      |
| 246 | (-)-2-oxo-13-hydroxy-3,14-clerodan-diene                                          | =O           | Me                             | $\alpha$ Me | H                              | H            | $\alpha$ Me | $\alpha$ Me        | $\beta$ OH       | <i>Guarea trichilioides</i>       | <i>Phytochemistry</i> , 1996, <b>41</b> , 1159-1161    |
| 247 | <i>cis</i> -3,14-clerodadien-13-ol                                                | H            | Me                             | $\beta$ Me  | H                              | H            | $\alpha$ Me | $\alpha$ Me        | OH               | <i>Jungermannia</i>               | <i>J. Nat. Prod.</i> , 2001, <b>64</b> , 1309-1317     |

|     |                                                           |                     |                     |     |   |   |     |     |     |                                   |                                                   |
|-----|-----------------------------------------------------------|---------------------|---------------------|-----|---|---|-----|-----|-----|-----------------------------------|---------------------------------------------------|
| 248 | <i>ent</i> -kolavelool                                    | H                   | Me                  | βMe | H | H | βMe | βMe | αOH | <i>infusca</i>                    |                                                   |
| 249 | 15,16-diacetoxy- <i>ent</i> -cleroda-3,12 <i>E</i> -diene | CH <sub>2</sub> OAc | CH <sub>2</sub> OAc | —   | — | — | —   | —   | —   | <i>Linaria saxatilis</i>          | <i>Phytochemistry</i> , 1993, <b>33</b> , 631-633 |
| 250 | <i>ent</i> -cleroda-3,12 <i>E</i> -diene-15,16-dial       | CHO                 | CHO                 | —   | — | — | —   | —   | —   |                                   |                                                   |
| 251 | 15,16-diacetoxy- <i>ent</i> -cleroda-3,12 <i>Z</i> -diene | CH <sub>2</sub> OAc | CH <sub>2</sub> OAc | —   | — | — | —   | —   | —   |                                   |                                                   |
| 252 | <i>ent</i> -cleroda-3,12 <i>Z</i> -diene-15,16-dial       | CHO                 | CHO                 | —   | — | — | —   | —   | —   |                                   |                                                   |
| 253 | palmadorin C                                              | —                   | —                   | —   | — | — | —   | —   | —   | <i>Austrodoris kerguelenensis</i> | <i>J. Nat. Prod.</i> , 2010, <b>73</b> , 416–421  |

### 1.2.2. Type I Subtype IIb with a Double Bond at Another (or No) Position (Table 6)

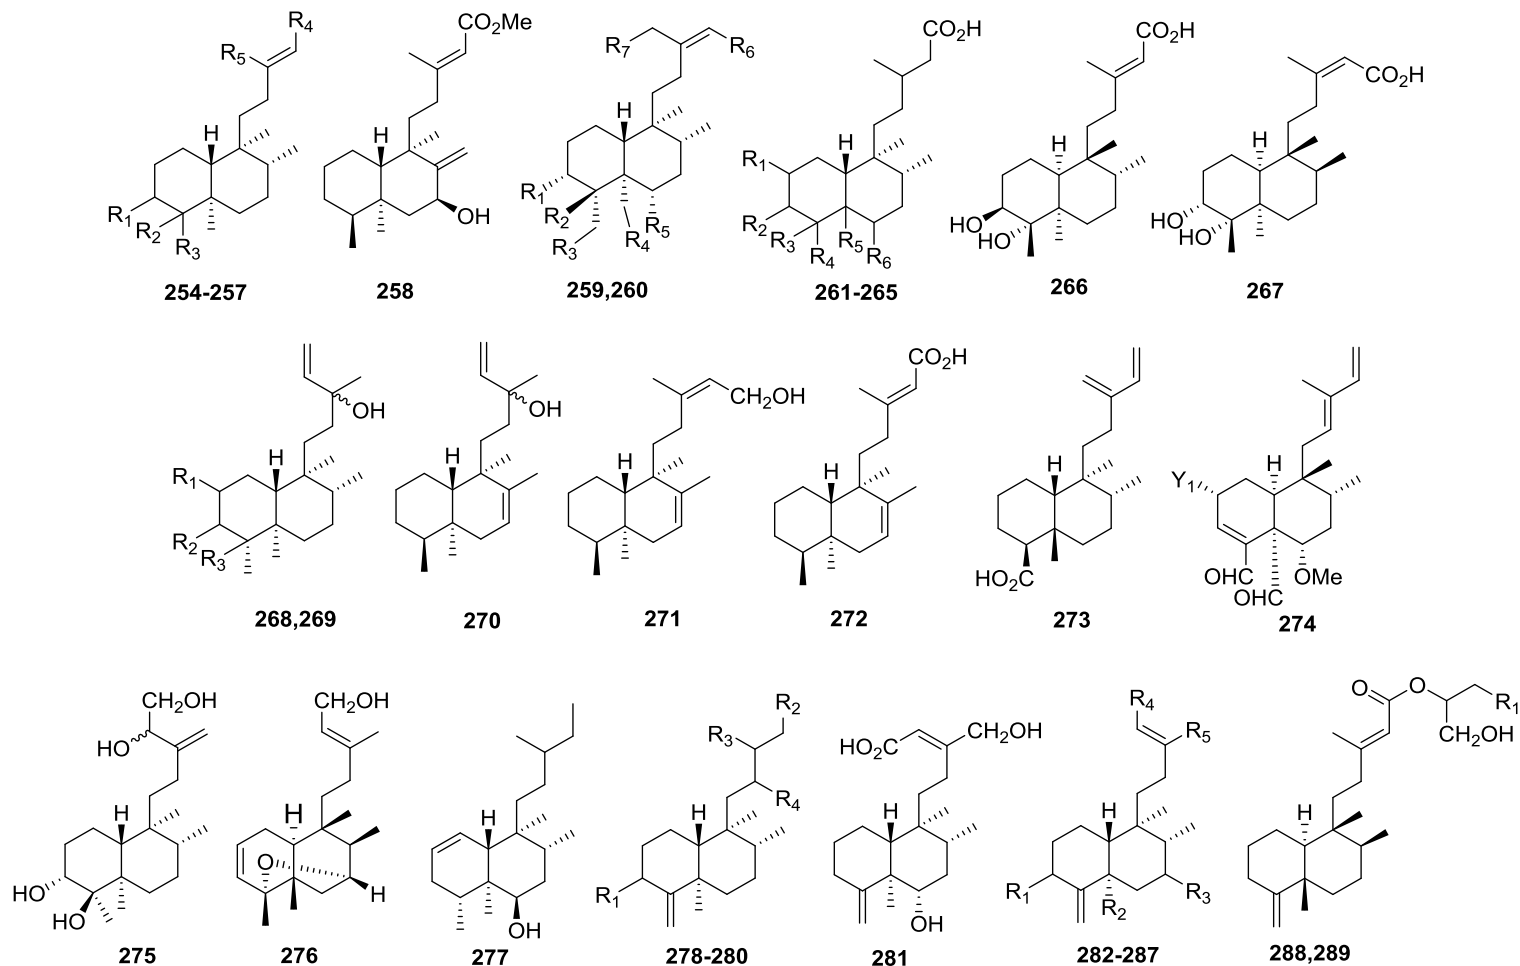

| No. | Compound Name                                                  | R <sub>1</sub> | R <sub>2</sub> | R <sub>3</sub>             | R <sub>4</sub>     | R <sub>5</sub>     | R <sub>6</sub> | R <sub>7</sub> | Source                         | Ref.                                                  |
|-----|----------------------------------------------------------------|----------------|----------------|----------------------------|--------------------|--------------------|----------------|----------------|--------------------------------|-------------------------------------------------------|
| 254 | 3 $\alpha$ ,4 $\beta$ ,13E-neoclerod-13-ene-3,4,15-triol       | $\alpha$ OH    | $\beta$ OH     | $\alpha$ Me                | CH <sub>2</sub> OH | Me                 | —              | —              | <i>Amoora stellatosquamosa</i> | <i>Helv. Chim. Acta</i> , 2004, <b>87</b> , 1279-1286 |
| 255 | 3 $\alpha$ ,4 $\beta$ ,13E-4-ethoxy-neoclerod-13-ene-3,15-diol | $\alpha$ OH    | $\beta$ OEt    | $\alpha$ Me                | CH <sub>2</sub> OH | Me                 | —              | —              |                                |                                                       |
| 256 | crolechinol                                                    | H              | H              | $\beta$ CH <sub>2</sub> OH | CH <sub>2</sub> OH | CH <sub>2</sub> OH | —              | —              | <i>Croton lechleri</i>         | <i>Phytochemistry</i> , 1993, <b>32</b> , 755-760     |
| 257 | 3R,4R-dihydroxyclerod-13E-en-15-al                             | $\alpha$ OH    | $\beta$ OH     | $\alpha$ Me                | CHO                | Me                 | —              | —              | <i>Jungermannia hyalina</i>    | <i>Phytochemistry</i> , 1995, <b>40</b> , 209-212     |

|     |                                                                                |             |                    |                  |                            |                    |                    |    |                                                      |                                                               |
|-----|--------------------------------------------------------------------------------|-------------|--------------------|------------------|----------------------------|--------------------|--------------------|----|------------------------------------------------------|---------------------------------------------------------------|
| 258 | (-)-7 $\beta$ -hydroxy cleroda-8(17),13E-dien-15-oic acid                      | —           | —                  | —                | —                          | —                  | —                  | —  | <i>Eperua leucantha</i>                              | <i>J. Nat. Prod.</i> , 1992, <b>55</b> , 845-850              |
| 259 | 3R,4R-dihydroxyclerod-13Z-en-15-al                                             | OH          | OH                 | H                | H                          | H                  | CHO                | H  | <i>Jungermannia hyalina</i>                          | <i>Phytochemistry</i> , 1995, <b>40</b> , 209-212             |
| 260 | sypirensin B                                                                   | H           | H                  | OH               | OH                         | OH                 | CH <sub>2</sub> OH | OH | <i>Teucrium chamaedrys</i><br>ssp. <i>sypirensis</i> | <i>J. Nat. Prod.</i> , 1996, <b>59</b> , 457-460              |
| 261 | 2 $\beta$ -hydroxy-3-oxo- <i>cis</i> -clerodan-15-oic acid                     | $\beta$ OH  | =O                 | H                | $\beta$ Me                 | $\beta$ Me         | H                  | —  | <i>Chrysocoma coma aurea</i>                         | <i>Phytochemistry</i> , 1991, <b>30</b> , 607-609             |
| 262 | 6 $\alpha$ -angeloyloxy-4 $\alpha$ -hydroxy-3,4,13,14-tetrahydrokolavenic acid | H           | H                  | $\alpha$ OH      | $\beta$ Me                 | $\alpha$ Me        | $\alpha$ OTig      | —  | <i>Pteronia camphorata</i>                           | <i>Phytochemistry</i> , 1990, <b>29</b> , 1231-1245           |
| 263 | 4 $\alpha$ ,18-dihydroxyclerodan-15-oic acid                                   | H           | H                  | $\alpha$ OH      | $\beta$ CH <sub>2</sub> OH | $\alpha$ Me        | H                  | —  | <i>Clausena dunniana</i>                             | <i>Helv. Chim. Acta.</i> , 2003, <b>86</b> , 3187-3193        |
| 264 | 4 $\beta$ -hydroxyclerodan-15-oic acid                                         | H           | H                  | $\beta$ OH       | $\alpha$ Me                | $\alpha$ Me        | H                  | —  |                                                      |                                                               |
| 265 | 3 $\alpha$ ,4 $\alpha$ -dihydroxy clerodan-15-oic acid                         | H           | $\alpha$ OH        | $\alpha$ OH      | $\beta$ Me                 | $\alpha$ Me        | H                  | —  |                                                      |                                                               |
| 266 | 3,4-dihydroxyclerodan-13E-en-15-oic acid                                       | —           | —                  | —                | —                          | —                  | —                  | —  | <i>Detarium microcarpum</i>                          | <i>J. Nat. Prod.</i> , 2006, <b>69</b> , 768-773              |
| 267 | 3,4-dihydroxyclerodan-13Z-en-15-oic acid                                       | —           | —                  | —                | —                          | —                  | —                  | —  |                                                      |                                                               |
| 268 | roseotetrol                                                                    | $\alpha$ OH | $\alpha$ OH        | $\beta$ OH       | —                          | —                  | —                  | —  | <i>Stachys rosea</i>                                 | <i>Phytochemistry</i> , 1994, <b>37</b> , 501-503             |
| 269 | roseostachone                                                                  | H           | =O                 | H                | —                          | —                  | —                  | —  |                                                      | <i>Phytochemistry</i> , 1992, <b>31</b> , 3147-3149           |
| 270 | 13-hydroxycleroda-7,14-diene                                                   | —           | —                  | —                | —                          | —                  | —                  | —  | <i>Carex distachya</i>                               | <i>Nat. Prod. Commun.</i> , 2010, <b>5</b> , 1539-1542        |
| 271 | 15-hydroxycleroda-7,13-diene                                                   | —           | —                  | —                | —                          | —                  | —                  | —  |                                                      |                                                               |
| 272 | (-)-cleroda-7,13E-dien-15-oic acid                                             | —           | —                  | —                | —                          | —                  | —                  | —  | <i>Eperua purpurea</i>                               | <i>J. Nat. Prod.</i> , 1993, <b>56</b> , 1586-1589            |
| 273 | —                                                                              | —           | —                  | —                | —                          | —                  | —                  | —  | <i>Schistochila aligera</i>                          | <i>Phytochemistry</i> , 1991, <b>30</b> , 849-851             |
| 274 | laetiaprocerine D                                                              | —           | —                  | —                | —                          | —                  | —                  | —  | <i>Laetia procera</i>                                | <i>Bioorg. Med. Chem. Lett.</i> , 2005, <b>15</b> , 5065-5070 |
| 275 | (3 $\alpha$ ,4 $\beta$ -14RS)-neo-clerod-13(16)-ene-3,4,14,15-tetrol           | —           | —                  | —                | —                          | —                  | —                  | —  | <i>Amoora stellatosquamosa</i>                       | <i>Helv. Chim. Acta.</i> , 2004, <b>87</b> , 1279-1286        |
| 276 | leojaponin A                                                                   | —           | —                  | —                | —                          | —                  | —                  | —  | <i>Leonurus japonicus</i>                            | <i>Chin. Chem. Lett.</i> , 2014, <b>25</b> , 677-679          |
| 277 | tinosporaclerodanol                                                            | —           | —                  | —                | —                          | —                  | —                  | —  | <i>Tinospora cordifolia</i>                          | <i>Nat. Prod. Res.</i> , 2010, <b>24</b> , 926-934            |
| 278 | pentandranic acid C                                                            | $\alpha$ OH | CO <sub>2</sub> H  | =CH <sub>2</sub> | =O                         | —                  | —                  | —  | <i>Callicarpa pentandra</i>                          | <i>J. Nat. Prod.</i> , 2000, <b>63</b> , 1062-1065            |
| 279 | 3 $\beta$ -hydroxy-clerod-4(18)-en-15-oic acid                                 | $\beta$ OH  | CO <sub>2</sub> H  | Me               | H                          | —                  | —                  | —  | <i>Clausena dunniana</i>                             | <i>Helv. Chim. Acta.</i> , 2003, <b>86</b> , 3187-319         |
| 280 | ethyl-clerod-4(18)-en-15-oate                                                  | H           | CO <sub>2</sub> Et | Me               | H                          | —                  | —                  | —  |                                                      |                                                               |
| 281 | 6 $\alpha$ ,16-dihydroxy cleroda-4(18),13-dien-15-oic acid                     | —           | —                  | —                | —                          | —                  | —                  | —  |                                                      |                                                               |
| 282 | —                                                                              | $\alpha$ OH | Me                 | $\alpha$ OAc     | CO <sub>2</sub> Me         | Me                 | —                  | —  | <i>Solidago altissima</i>                            | <i>Phytochemistry</i> , 1999, <b>52</b> , 487-493             |
| 283 | —                                                                              | $\beta$ OH  | Me                 | $\alpha$ OAc     | CO <sub>2</sub> Me         | Me                 | —                  | —  |                                                      |                                                               |
| 284 | —                                                                              | =O          | Me                 | H                | CO <sub>2</sub> Me         | Me                 | —                  | —  |                                                      |                                                               |
| 285 | cleroda-4(18),13(14)E-dien-15-oic acid                                         | H           | Me                 | H                | CO <sub>2</sub> H          | Me                 | —                  | —  | <i>Polyalthia cheliensis</i>                         | <i>Phytochemistry</i> , 1995, <b>39</b> , 447-448             |
| 286 | 3-hydroxy-cleroda-4(18),13Z-dien-15-oic acid                                   | $\beta$ OH  | Me                 | H                | CO <sub>2</sub> H          | Me                 | —                  | —  | <i>Cyathocalyx zeylanica</i>                         | <i>Phytochemistry</i> , 1995, <b>39</b> , 443-445             |
| 287 | porwenin A                                                                     | H           | CO <sub>2</sub> H  | H                | CH <sub>2</sub> OH         | CH <sub>2</sub> OH | —                  | —  | <i>Portulaca okinawensis</i>                         | <i>J. Nat. Prod.</i> , 2001, <b>64</b> , 804-805              |



|     |              |     |   |   |   |   |   |   |                                       |                                                  |
|-----|--------------|-----|---|---|---|---|---|---|---------------------------------------|--------------------------------------------------|
| 288 | palmadorin A | OH  | — | — | — | — | — | — | <i>Austrodoris<br/>kerguelenensis</i> | <i>J. Nat. Prod.</i> , 2010, <b>73</b> , 416–421 |
| 289 | palmadorin B | OAc | — | — | — | — | — | — |                                       |                                                  |

### 1.3. Type I Subtype III with an Epoxy Ring (Table 7)

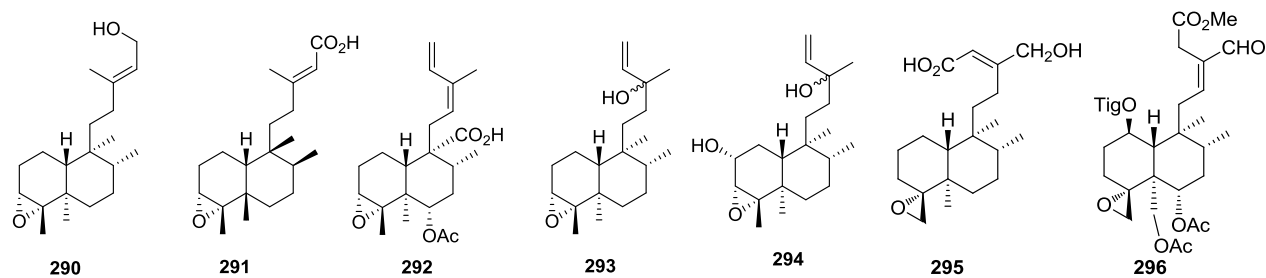

| No. | Compound Name                                                       | Source                       | Ref.                                                |
|-----|---------------------------------------------------------------------|------------------------------|-----------------------------------------------------|
| 290 | <i>ent</i> -3 $\beta$ ,4 $\beta$ -epoxyclerod-13 <i>E</i> -en-15-ol | <i>Jungermannia hyalina</i>  | <i>Phytochemistry</i> , 1995, <b>40</b> , 209-212   |
| 291 | 3,4-epoxyclerodan-13 <i>E</i> -en-15-oic acid                       | <i>Detarium microcarpum</i>  | <i>J. Nat. Prod.</i> , 2006, <b>69</b> , 768-773    |
| 292 | heteroscyphic acid C                                                | <i>Heteroscyphus planus</i>  | <i>Phytochemistry</i> , 1994, <b>37</b> , 1263-1268 |
| 293 | <i>ent</i> -3 $\beta$ ,4 $\beta$ -epoxy-clerod-14-en-13 $\zeta$ -ol | <i>Jungermannia paroica</i>  | <i>Phytochemistry</i> , 1992, <b>31</b> , 1420-1421 |
| 294 | 3 $\alpha$ ,4 $\alpha$ -epoxyroseostachenol                         | <i>Stachys glutinosa</i>     | <i>J. Nat. Prod.</i> , 2015, <b>78</b> , 69-76      |
| 295 | 4 $\alpha$ ,18 $\beta$ -epoxy-16-hydroxyclerod-13-en-15-oic acid    | <i>Polyalthia longifolia</i> | <i>J. Nat. Prod.</i> , 2009, <b>72</b> , 1960-1963  |
| 296 | ajugacumbin J                                                       | <i>Ajuga decumbens</i>       | <i>Nat. Prod. Res.</i> , 2014, <b>28</b> , 196-200  |

## 2. Type II with a 2-Ethylfuran-based Side Chain at C-9

### 2.1. Type II with Various *O*-Containing Rings

#### 2.1.1. Type II Subtype Ia with Various *O*-Containing Rings (Table 8)

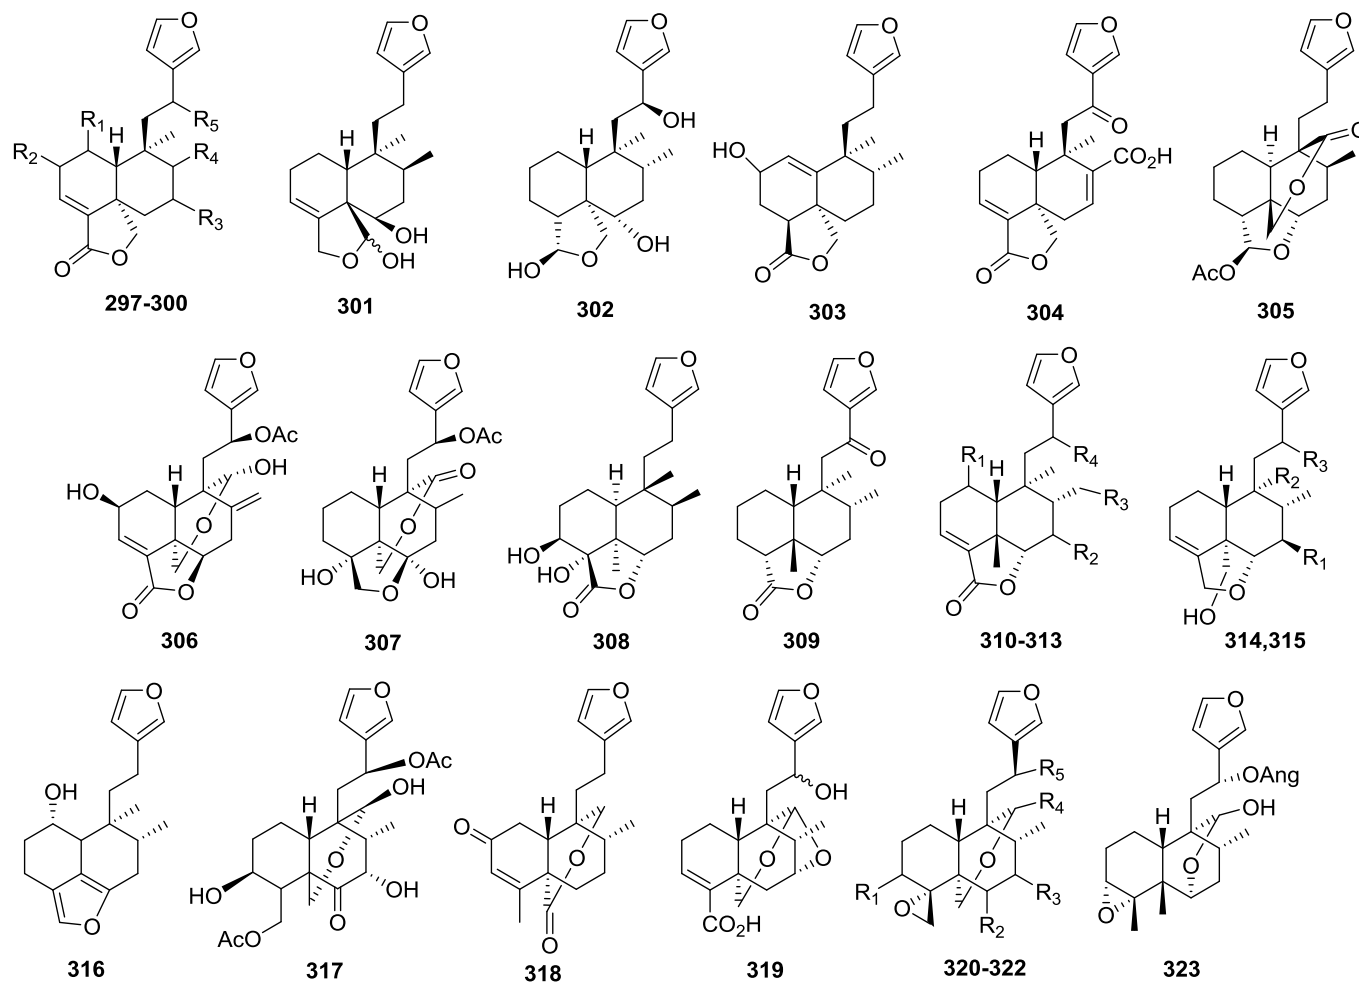

| No. | Compound Name                                                                                                                                 | R <sub>1</sub> | R <sub>2</sub>    | R <sub>3</sub> | R <sub>4</sub>      | R <sub>5</sub> | Source                          | Ref.                                                    |
|-----|-----------------------------------------------------------------------------------------------------------------------------------------------|----------------|-------------------|----------------|---------------------|----------------|---------------------------------|---------------------------------------------------------|
| 297 | nasimalun A                                                                                                                                   | H              | H                 | H              | αCO <sub>2</sub> Me | H              | <i>Barringtonia racemosa</i>    | <i>J. Nat. Prod.</i> , 2000, <b>63</b> , 410-411        |
| 298 | 2α-hydroxy-7α-acetoxy-12-oxo-15:16-epoxy-neoclerodan-3,13(16),14-trien-18:19-olide                                                            | H              | OH                | αOAc           | αMe                 | =O             | <i>Salvia urolepis</i>          | <i>Phytochemistry</i> , 1995, <b>38</b> , 171-174       |
| 299 | —                                                                                                                                             | H              | H                 | βOAc           | αMe                 | OH             | <i>Salvia miniata</i>           | <i>Phytochemistry</i> , 2011, <b>72</b> , 265-275       |
| 300 | ent-(5R,9S,10S)-7S-acetoxy-15,16-epoxy-1S,2S,12ζ-trihydroxycleroda-3,13(16),14-trien-18,19-olide                                              | αOH            | βOH               | αOAc           | βMe                 | OH             | <i>Salvia haenke</i>            | <i>Tetrahedron</i> , 1997, <b>53</b> , 14719-14728      |
| 301 | raspailol                                                                                                                                     | —              | —                 | —              | —                   | —              | <i>Raspailia</i> species        | <i>Aust. J. Chem.</i> , 1998, <b>51</b> , 1097-1101     |
| 302 | teumassilenin B                                                                                                                               | —              | —                 | —              | —                   | —              | <i>Teucrium massiliense</i>     | <i>J. Nat. Prod.</i> , 1998, <b>61</b> , 1242-1247      |
| 303 | gaudichaudone                                                                                                                                 | —              | —                 | —              | —                   | —              | <i>Baccharis gaudichaudiana</i> | <i>J. Nat. Prod.</i> , 1994, <b>57</b> , 801-807        |
| 304 | dugesin G                                                                                                                                     | —              | —                 | —              | —                   | —              | <i>Salvia dugesii</i>           | <i>Nat. Prod. Bioprospect.</i> , 2011, <b>1</b> , 81-86 |
| 305 | teuctomin                                                                                                                                     | —              | —                 | —              | —                   | —              | <i>Teucrium tomentosum</i>      | <i>Nat. Prod. Res.</i> , 2010, <b>24</b> , 7-12         |
| 306 | plaunol E                                                                                                                                     | —              | —                 | —              | —                   | —              | <i>Croton stellatopilosus</i>   | <i>J. Nat. Med.</i> , 2013, <b>67</b> , 174-181         |
| 307 | 12-O-acetylteugnaphalodin                                                                                                                     | —              | —                 | —              | —                   | —              | <i>Teucrium oxylepis</i>        | <i>Phytochemistry</i> , 1991, <b>30</b> , 4079-4082     |
| 308 | (2aβ,3α,5aβ,6β,7R,8αα)-6-[2-(3-furanyl)ethyl]-2a,3,4,5,5a,6,7,8,8a,8b-decahydro-2a,3-dihydroxy-6,7,8b-trimethyl-2H-naphtho[1,8-bc]furan-2-one | —              | —                 | —              | —                   | —              | <i>Tinospora rumphii</i>        | <i>J. Nat. Prod.</i> , 2000, <b>63</b> , 509-511        |
| 309 | dihydrolinguifolide                                                                                                                           | —              | —                 | —              | —                   | —              | <i>Demotarisia linguifolia</i>  | <i>Phytochemistry</i> , 1990, <b>29</b> , 3229-3231     |
| 310 | linguifolide                                                                                                                                  | H              | H                 | H              | =O                  | —              |                                 |                                                         |
| 311 | 1β-acetoxy-12-hydroxy-15,16-epoxy-cis-cleroda-3,13(16),14-triene-18,16-olide                                                                  | βOAc           | H                 | H              | OH                  | —              | <i>Jamesoniella autumnalis</i>  | <i>Phytochemistry</i> , 1995, <b>39</b> , 859-868       |
| 312 | 1β-acetoxy-7,12-dihydroxy-15,16-epoxy-cis-cleroda-3,13(16),14-triene-18,6-olide                                                               | βOAc           | βOH               | H              | OH                  | —              |                                 | <i>Phytochemistry</i> , 1998, <b>48</b> , 681-685       |
| 313 | 17-acetoxy-1β,12-dihydroxy-15,16-epoxy-cis-ent-cleroda-3,13(16),14-triene-6α,18-olide*                                                        | βOH            | H                 | OAc            | OH                  | —              |                                 | <i>J. Nat. Prod.</i> , 1992, <b>55</b> , 111-121        |
| 314 | tepolin A                                                                                                                                     | OH             | CO <sub>2</sub> H | OH             | —                   | —              | <i>Teucrium polium</i>          | <i>Him. Prir. Soedin.</i> , 1992, <b>5</b> , 503-508    |
| 315 | tepolin B                                                                                                                                     | H              | CO <sub>2</sub> H | OH             | —                   | —              |                                 |                                                         |
| 316 | difuranofruticol                                                                                                                              | —              | —                 | —              | —                   | —              | <i>Teucrium fruticans</i>       | <i>Phytochemistry</i> , 2005, <b>66</b> , 2298-2303     |
| 317 | syrapolin II                                                                                                                                  | —              | —                 | —              | —                   | —              | <i>Teucrium polium</i>          | <i>Jordan J. Chem.</i> , 2011, <b>6</b> , 339-345       |
| 318 | sacacarin                                                                                                                                     | —              | —                 | —              | —                   | —              | <i>Croton cajucara</i>          | <i>Phytochemistry</i> , 1998, <b>49</b> , 823-828       |

|     |                                                              |            |             |    |             |            |                          |                                                     |
|-----|--------------------------------------------------------------|------------|-------------|----|-------------|------------|--------------------------|-----------------------------------------------------|
| 319 | —                                                            | —          | —           | —  | —           | —          | <i>Salvia miniata</i>    | <i>Phytochemistry</i> , 2011, <b>72</b> , 265-275   |
| 320 | 6 $\beta$ - <i>O</i> -acetyl-3 $\beta$ -hydroxyteucroxylepin | $\beta$ OH | $\beta$ OAc | H  | =O          | OH         | <i>Teucrium yemense</i>  | <i>Phytochemistry</i> , 1995, <b>40</b> , 1737-1741 |
| 321 | teucroxylepin                                                | H          | $\beta$ OH  | H  | =O          | $\beta$ OH | <i>Teucrium oxylepis</i> | <i>Phytochemistry</i> , 1991, <b>30</b> , 4079-4082 |
| 322 | montanin H                                                   | H          | $\alpha$ OH | =O | $\alpha$ OH | OAc        | <i>Teucrium montanum</i> | <i>Phytochemistry</i> , 1992, <b>31</b> , 4029-4030 |
| 323 | pteroneeniol                                                 | —          | —           | —  | —           | —          | <i>Pteronia eenii</i>    | <i>Phytochemistry</i> , 1990, <b>29</b> , 1231-1245 |

\*Compound's name (6 $\alpha$ ,18-olide) and structure (18,6 $\alpha$ -olide) are shown as given in reference 121.

### 2.1.2. Type II Subtype Ib with Other *O*-Containing Rings (Table 9)

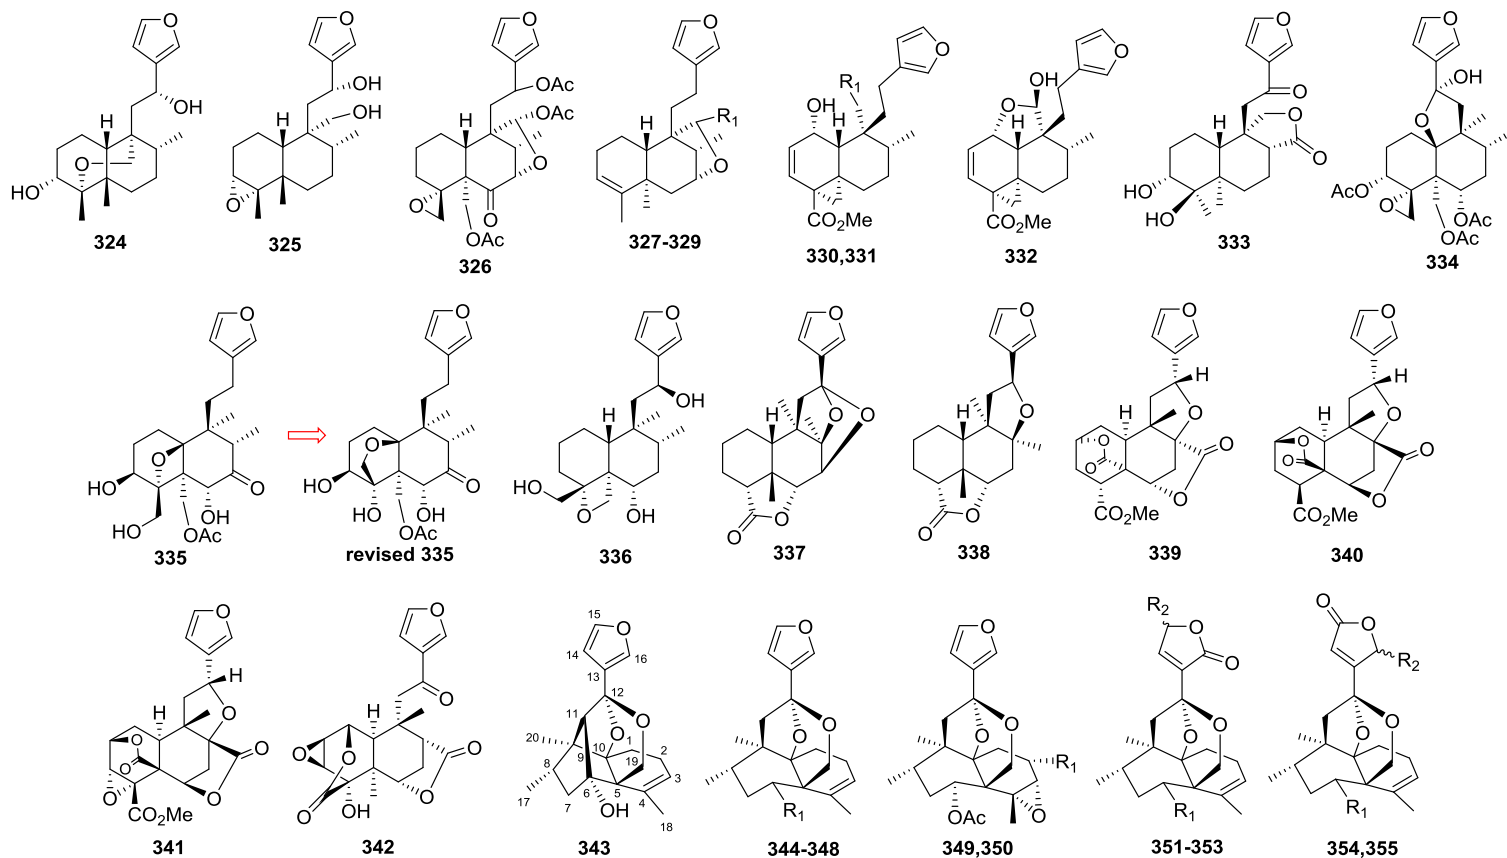

| No. | Compound Name                                                                                              | R <sub>1</sub> | R <sub>2</sub> | Source                         | Ref.                                        |
|-----|------------------------------------------------------------------------------------------------------------|----------------|----------------|--------------------------------|---------------------------------------------|
| 324 | 3 $\alpha$ ,12-dihydroxy-4 $\alpha$ ,20,15,16-bisepoxy-8 $\beta$ ,10 $\beta$ H-ent-cleroda-13(16),14-diene | —              | —              | <i>Microglossa pyrhopappa</i>  | Phytochemistry, 1990, <b>29</b> , 3233-3241 |
| 325 | 12,20-dihydroxy-3 $\alpha$ ,4 $\alpha$ ,15,16-bisepoxy-8 $\beta$ ,10 $\beta$ H-ent-cleroda-13(16),14-diene | —              | —              |                                |                                             |
| 326 | teucosin B                                                                                                 | —              | —              | <i>Teucrium cossonii</i>       | Phytochemistry, 1992, <b>31</b> , 3957-3960 |
| 327 | ptychonolide                                                                                               | =O             | —              | <i>Ptychopetalum olacoides</i> | J. Nat. Prod., 2008, <b>71</b> , 1760-1763  |
| 328 | 20- <i>O</i> -methylptychonolide                                                                           | $\beta$ OMe    | —              |                                |                                             |
| 329 | ptychonolide hemiacetal                                                                                    | $\beta$ OH     | —              |                                |                                             |
| 330 | methyl dodonate A                                                                                          | H              | —              | <i>Dodonaea viscosa</i>        | Tetrahedron, 2001, <b>57</b> , 2981-2989    |

|     |                                                                                                    |              |    |                                   |                                                                   |
|-----|----------------------------------------------------------------------------------------------------|--------------|----|-----------------------------------|-------------------------------------------------------------------|
| 331 | methyl dodonate B                                                                                  | OH           | —  |                                   |                                                                   |
| 332 | methyl dodonate C                                                                                  | —            | —  |                                   |                                                                   |
| 333 | furocrotinsulolide B                                                                               | —            | —  | <i>Croton insularis</i>           | <i>Helv. Chim. Acta.</i> , 2005, <b>88</b> , 2654-2660            |
| 334 | teucrolin A                                                                                        | —            | —  | <i>Teucrium oliverianum</i>       | <i>J. Nat. Prod.</i> , 1993, <b>56</b> , 830-842                  |
| 335 | teucrolin E                                                                                        | —            | —  |                                   | <i>Phytochemistry</i> , 2002, <b>59</b> , 409-414                 |
| 336 | teumassilenin C                                                                                    | —            | —  | <i>Teucrium massiliense</i>       | <i>J. Nat. Prod.</i> , 1998, <b>61</b> , 1242-1247                |
| 337 | anastreptin                                                                                        | —            | —  | <i>Adelanthus lindenbergianus</i> | <i>Phytochemistry</i> , 2004, <b>65</b> , 127-137                 |
| 338 | 8 $\beta$ ,12:15,16-diepoxy- <i>cis-ent</i> -cleroda-13(16),14-dien-18 $\alpha$ ,6 $\alpha$ -olide | —            | —  |                                   |                                                                   |
| 339 | bafoudiosbulbin A                                                                                  | —            | —  | <i>Dioscorea bulbifera</i>        | <i>Phytochemistry</i> , 2006, <b>67</b> , 1957-1963               |
| 340 | bafoudiosbulbin D                                                                                  | —            | —  |                                   | <i>Helv. Chim. Acta</i> , 2007, <b>90</b> , 1599-1605             |
| 341 | bafoudiosbulbin E                                                                                  | —            | —  |                                   |                                                                   |
| 342 | Apiciflorin                                                                                        | —            | —  | <i>Cleidion spiciflorum</i>       | <i>Phytochemistry</i> , 2006, <b>67</b> , 1029-1033               |
| 343 | scaparvin A                                                                                        | —            | —  | <i>Scapania parva</i>             | <i>Org. Lett.</i> , 2010, <b>12</b> , 4404-4407                   |
| 344 | scaparvin B                                                                                        | =O           | —  |                                   |                                                                   |
| 345 | scaparvin C                                                                                        | $\alpha$ OH  | —  |                                   |                                                                   |
| 346 | scaparvin D                                                                                        | $\alpha$ OAc | —  |                                   |                                                                   |
| 347 | parvitexin A                                                                                       | H            | —  | <i>Scapania parvitexta</i>        | <i>Biosci. Biotechnol. Biochem.</i> , 2007, <b>71</b> , 2751-2758 |
| 348 | parvitexin B                                                                                       | $\beta$ OAc  | —  |                                   |                                                                   |
| 349 | parvitexin C                                                                                       | $\beta$ OH   | —  |                                   |                                                                   |
| 350 | scaparvin E                                                                                        | OAc          | —  | <i>Scapania parva</i>             | <i>Org. Lett.</i> , 2010, <b>12</b> , 4404-4407                   |
| 351 | stephanialide A                                                                                    | =O           | OH | <i>Scapania stephanii</i>         | <i>Phytochemistry</i> , 2014, <b>105</b> , 85-91                  |
| 352 | stephanialide B                                                                                    | $\beta$ OH   | OH |                                   |                                                                   |
| 353 | stephanialide C                                                                                    | $\beta$ OAc  | OH |                                   |                                                                   |
| 354 | stephanialide D                                                                                    | =O           | OH |                                   |                                                                   |
| 355 | stephanialide E                                                                                    | $\beta$ OAc  | OH |                                   |                                                                   |

### 2.1.3. Type II Subtype Ic with a Simple Epoxy Ring (Table 10)

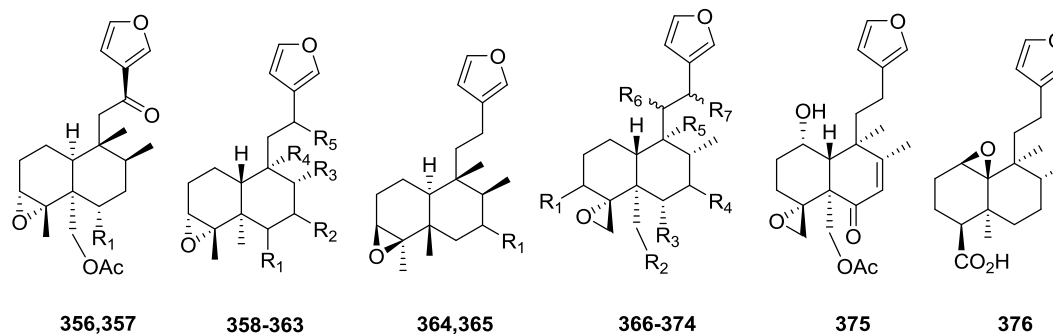

| No. | Compound Name                              | R <sub>1</sub> | R <sub>2</sub> | R <sub>3</sub>     | R <sub>4</sub>      | R <sub>5</sub>      | R <sub>6</sub> | R <sub>7</sub> | Source                             | Ref.                                                              |
|-----|--------------------------------------------|----------------|----------------|--------------------|---------------------|---------------------|----------------|----------------|------------------------------------|-------------------------------------------------------------------|
| 356 | parvitexin D                               | OAc            | —              | —                  | —                   | —                   | —              | —              | <i>Scapania parvixesta</i>         | <i>Biosci. Biotechnol. Biochem.</i> , 2007, <b>71</b> , 2751-2758 |
| 357 | parvitexin E                               | OH             | —              | —                  | —                   | —                   | —              | —              |                                    |                                                                   |
| 358 | epoxychiromodine                           | H              | H              | CO <sub>2</sub> Me | Me                  | =O                  | —              | —              | <i>Croton megalocarpus</i>         | <i>Phytochemistry</i> , 1992, <b>31</b> , 2055-2058               |
| 359 | eluterin C                                 | H              | αOAc           | Me                 | CH <sub>2</sub> OH  | H                   | —              | —              | <i>Croton eluteria</i>             | <i>J. Agric. Food Chem.</i> , 2002, <b>50</b> , 5131-5138         |
| 360 | eluterin D                                 | H              | αOH            | Me                 | CH <sub>2</sub> OAc | H                   | —              | —              |                                    |                                                                   |
| 361 | eluterin E                                 | H              | αOAc           | Me                 | CH <sub>2</sub> OH  | βOH                 | —              | —              |                                    |                                                                   |
| 362 | eluterin F                                 | αOAc           | αOAc           | Me                 | CH <sub>2</sub> OAc | H                   | —              | —              |                                    |                                                                   |
| 363 | eluterin G                                 | αOAc           | αOAc           | Me                 | CHO                 | H                   | —              | —              |                                    |                                                                   |
| 364 | 3β,4β:15,16-diepoxy-13(16),14-clerodadiene | H              | —              | —                  | —                   | —                   | —              | —              | <i>Thysananthus spathulistipus</i> | <i>Chem. Pharm. Bull.</i> , 2006, <b>54</b> , 1046-1049           |
| 365 | thysaspathone                              | =O             | —              | —                  | —                   | —                   | —              | —              |                                    |                                                                   |
| 366 | teucossin A                                | H              | OAc            | OH                 | H                   | CH <sub>2</sub> OAc | H              | OAc            | <i>Teucrium cossonii</i>           | <i>Phytochemistry</i> , 1992, <b>31</b> , 3957-3960               |
| 367 | teugracilin E                              | βOAc           | OAc            | OAc                | H                   | CH <sub>2</sub> OAc | H              | OAc            | <i>Teucrium gracile</i>            | <i>Phytochemistry</i> , 1992, <b>31</b> , 3531-3534               |
| 368 | teugracilin C                              | βOH            | OAc            | OH                 | H                   | Me                  | H              | OAc            |                                    | <i>Phytochemistry</i> , 1991, <b>30</b> , 3693-3697               |
| 369 | teucrolivin D                              | βOAc           | OAc            | OH                 | βOAc                | Me                  | H              | H              | <i>Teucrium oliverianum</i>        | <i>Phytochemistry</i> , 1991, <b>30</b> , 1603-1606               |
| 370 | teucrolivin E                              | βOAc           | OAc            | OH                 | =O                  | Me                  | H              | H              |                                    |                                                                   |
| 371 | 7β-hydroxyfruticolone                      | H              | OAc            | =O                 | βOH                 | Me                  | H              | H              | <i>Teucrium fruticans</i>          | <i>Phytochemistry</i> , 2004, <b>65</b> , 387-392                 |
| 372 | 11-hydroxyfruticolone                      | H              | OAc            | =O                 | H                   | Me                  | OH             | H              |                                    |                                                                   |
| 373 | deacetylfruticolone                        | H              | OH             | =O                 | H                   | Me                  | H              | H              |                                    |                                                                   |
| 374 | deoxyfruticolone                           | H              | OAc            | =O                 | H                   | Me                  | H              | H              |                                    |                                                                   |



|     |                      |   |   |   |   |   |   |   |                          |                                                      |
|-----|----------------------|---|---|---|---|---|---|---|--------------------------|------------------------------------------------------|
| 375 | didehydrofruticolone | — | — | — | — | — | — | — |                          |                                                      |
| 376 | phlomeoic acid       | — | — | — | — | — | — | — | <i>Phlomis bracteosa</i> | <i>Nat. Prod. Commun.</i> , 2011, <b>6</b> , 171-173 |

## 2.2. Type II with or without a C=C Double Bond in the Decalin Moiety

### 2.2.1. Type II Subtype IIa with One or More Decalin C=C Double Bonds (Table 11)

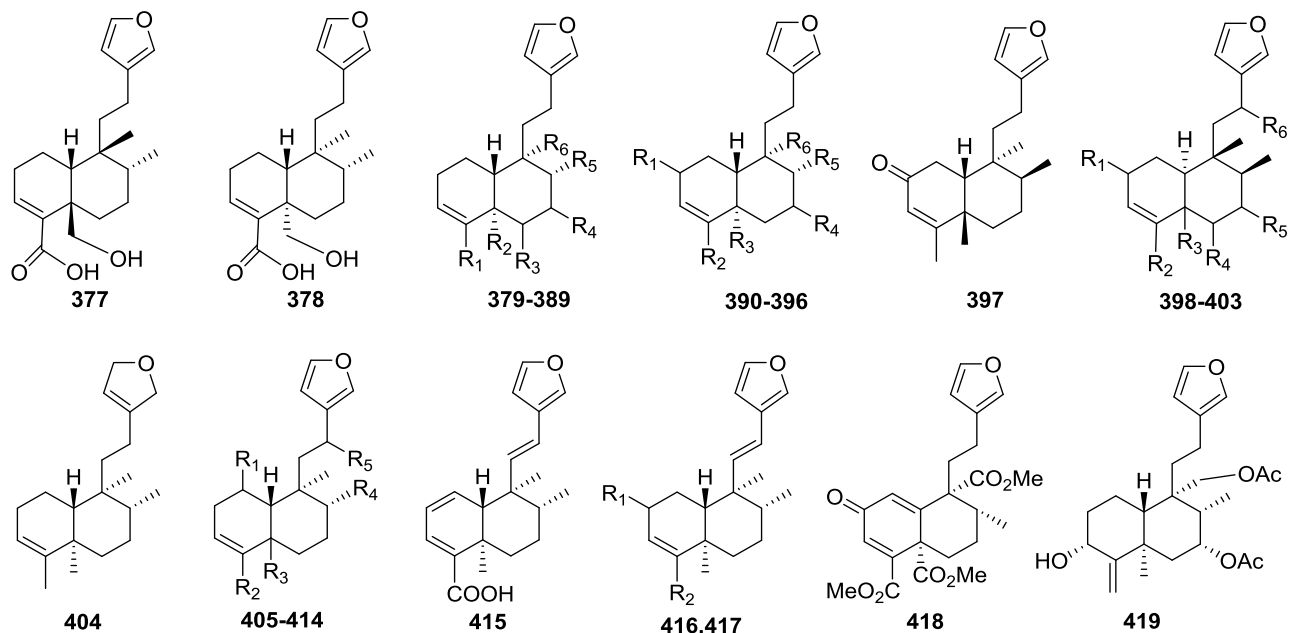

| No. | Compound Name           | R <sub>1</sub>     | R <sub>2</sub> | R <sub>3</sub> | R <sub>4</sub> | R <sub>5</sub>     | R <sub>6</sub>      | Source                         | Ref.                                                      |
|-----|-------------------------|--------------------|----------------|----------------|----------------|--------------------|---------------------|--------------------------------|-----------------------------------------------------------|
| 377 | vishautriwaic acid      | —                  | —              | —              | —              | —                  | —                   | <i>Dodonaea viscosa</i>        | <i>Z. Naturforsch. B</i> , 2010, <b>65</b> , 83-86        |
| 378 | hautriwaic acid         | —                  | —              | —              | —              | —                  | —                   | <i>Eremocarpus setigerus</i>   | <i>Indian J. Chem. B</i> , 1991, <b>30</b> , 1054-1055    |
| 379 | nasimalun B             | CO <sub>2</sub> Me | Me             | H              | H              | CO <sub>2</sub> Me | Me                  | <i>Barringtonia racemosa</i>   | <i>J. Nat. Prod.</i> , 2000, <b>63</b> , 410-411          |
| 380 | ptychonal               | Me                 | Me             | H              | αOH            | Me                 | CHO                 | <i>Ptychopetalum olacoides</i> | <i>J. Nat. Prod.</i> , 2008, <b>71</b> , 1760-1763        |
| 381 | eluterin K              | Me                 | Me             | αOAc           | αOAc           | Me                 | CH <sub>2</sub> OAc | <i>Croton eluteria</i>         | <i>J. Agric. Food Chem.</i> , 2003, <b>51</b> , 6970-6974 |
| 382 | 6α,7α-dihydroxyannonene | Me                 | Me             | αOH            | αOH            | Me                 | Me                  | <i>Ptychopetalum</i>           | <i>Bioorg. Med. Chem. Lett.</i> , 2009, <b>19</b> ,       |

|     |                                                                                                                    |                    |                   |                              |              |                     |                    |                                 |                                                         |
|-----|--------------------------------------------------------------------------------------------------------------------|--------------------|-------------------|------------------------------|--------------|---------------------|--------------------|---------------------------------|---------------------------------------------------------|
| 383 | 7 $\alpha$ ,20-dihydroxyannonene                                                                                   | Me                 | Me                | H                            | $\alpha$ OH  | Me                  | CH <sub>2</sub> OH | <i>olacoides</i>                | 882–886                                                 |
| 384 | 7 $\alpha$ -acetoxybacchotricuneatin D                                                                             | CH <sub>2</sub> OH | Me                | H                            | $\alpha$ OAc | Me                  | Me                 | <i>Copaifera sp.</i>            | <i>Phytochemistry</i> , 1996, <b>42</b> , 1653-1656     |
| 385 | 6 $\alpha$ -hydroxyannonene                                                                                        | Me                 | Me                | $\alpha$ OH                  | H            | Me                  | Me                 | <i>Croton sonderianus</i>       | <i>Phytochemistry</i> , 1994, <b>36</b> , 1457-1463     |
| 386 | 6 $\alpha$ ,7 $\beta$ -dihydroxyannonene                                                                           | Me                 | Me                | $\alpha$ OH                  | $\beta$ OH   | Me                  | Me                 |                                 |                                                         |
| 387 | 6 $\alpha$ ,7 $\beta$ -diacetoxyannonene                                                                           | Me                 | Me                | $\alpha$ OAc                 | $\beta$ OAc  | Me                  | Me                 |                                 |                                                         |
| 388 | 7 $\alpha$ -hydroxyhardwickiic acid                                                                                | CO <sub>2</sub> H  | Me                | H                            | $\alpha$ OH  | Me                  | Me                 | <i>Conyza hypoleuca</i>         | <i>Phytochemistry</i> 1991, <b>30</b> , 575-581         |
| 389 | 15,16-epoxy-8R-(benzoyloxy)methyl-cleroda-3,13(16),14-trien-18-oic acid                                            | CO <sub>2</sub> H  | Me                | H                            | H            | CH <sub>2</sub> OBz | Me                 | <i>Dodonaea polyandra</i>       | <i>J. Nat. Prod.</i> , 2011, <b>74</b> , 650-657        |
| 390 | 15,16-epoxy-8R-(benzoyloxy)methyl-2R-hydroxycleroda-3,13(16),14-trien-18-oic acid                                  | $\alpha$ OH        | CO <sub>2</sub> H | Me                           | H            | CH <sub>2</sub> OBz | Me                 |                                 |                                                         |
| 391 | 15,16-epoxy-2R-benzoyloxycleroda-3,13(16),14-trien-18-oic acid                                                     | $\alpha$ OBz       | CO <sub>2</sub> H | Me                           | H            | Me                  | Me                 |                                 |                                                         |
| 392 | 15,16-epoxy-8R-(benzoyloxy)methyl-2-oxocleroda-3,13(16),14-trien-18-oic acid                                       | =O                 | CO <sub>2</sub> H | Me                           | H            | CH <sub>2</sub> OBz | Me                 |                                 |                                                         |
| 393 | 15,16-epoxy-3,13(16)-clerodatriene-2-one                                                                           | =O                 | Me                | $\alpha$ Me                  | H            | Me                  | Me                 | <i>Croton ururucana</i>         | <i>Phytochemistry</i> , 1998, <b>49</b> , 171-174       |
| 394 | cajucarín A                                                                                                        | =O                 | Me                | CHO                          | H            | Me                  | CO <sub>2</sub> Me | <i>Croton cajucara</i>          | <i>Chem. Pharm. Bull.</i> , 1990, <b>38</b> , 701-705   |
| 395 | chromiargyne                                                                                                       | =O                 | Me                | Me                           | H            | Me                  | CO <sub>2</sub> Me | <i>Croton hemiargyreus</i>      | <i>Nat. Prod. Lett.</i> , 1998, <b>12</b> , 41-46       |
| 396 | 7-acetoxycromiargyne                                                                                               | =O                 | Me                | Me                           | OAc          | Me                  | CO <sub>2</sub> Me |                                 |                                                         |
| 397 | raspailenone                                                                                                       | —                  | —                 | —                            | —            | —                   | —                  | <i>Raspailia</i> species        | <i>Aust. J. Chem.</i> , 1998, <b>51</b> , 1097-1101     |
| 398 | laevigatbenzoate                                                                                                   | $\beta$ OBz        | CO <sub>2</sub> H | $\beta$ Me                   | H            | H                   | H                  | <i>Croton laevigatus</i>        | <i>J. Nat. Med.</i> , 2011, <b>65</b> , 391–394         |
| 399 | 6 $\beta$ -hydroxy-15,16-epoxy-5 $\beta$ ,8 $\beta$ ,9 $\beta$ ,10 $\alpha$ -cleroda-3,13(16),14-trien-18-oic acid | H                  | CO <sub>2</sub> H | $\beta$ Me                   | $\beta$ OH   | H                   | H                  | <i>Duranta repens</i>           | <i>Helv. Chim. Acta</i> , 2001, <b>84</b> , 649-655     |
| 400 | 2 $\beta$ -hydroxy-15,16-epoxy-5 $\beta$ ,8 $\beta$ ,9 $\beta$ ,10 $\alpha$ -cleroda-3,13(16),14-trien-18-oic acid | $\beta$ OH         | CO <sub>2</sub> H | $\beta$ Me                   | H            | H                   | H                  |                                 |                                                         |
| 401 | (5R,8S,9R,10S)-15,16-epoxy- <i>cis</i> -cleroda-3,13(16),14-trien-18-al                                            | H                  | CHO               | $\alpha$ Me                  | H            | H                   | H                  | <i>Gottschelia schizopleura</i> | <i>Planta Med.</i> , 2009, <b>75</b> , 1597-1601        |
| 402 | (+)-7 $\beta$ -acetoxy-15,16-epoxy-3,13(16),14-clerodatrien-18-oic acid                                            | H                  | CO <sub>2</sub> H | $\beta$ Me                   | H            | $\alpha$ OAc        | H                  | <i>Sindora sumatrana</i>        | <i>Chem. Pharm. Bull.</i> , 1994, <b>42</b> , 1202-1207 |
| 403 | scaparvin F                                                                                                        | H                  | Me                | $\alpha$ CH <sub>2</sub> OAc | $\beta$ OH   | H                   | $\beta$ OAc        | <i>Scapania</i>                 | <i>Phytochem. Lett.</i> , 2012, <b>5</b> , 535–540      |

|     |                                                                |             |                    |                           |                     |    |   |                                  |                                                              |
|-----|----------------------------------------------------------------|-------------|--------------------|---------------------------|---------------------|----|---|----------------------------------|--------------------------------------------------------------|
|     |                                                                |             |                    |                           |                     |    |   | <i>parva</i>                     |                                                              |
| 404 | crotonolide G                                                  | —           | —                  | —                         | —                   | —  | — | <i>Croton laui</i>               | <i>J. Nat. Prod.</i> , 2014, <b>77</b> , 1013-1020           |
| 405 | divinatorin A                                                  | $\alpha$ OH | CO <sub>2</sub> H  | $\alpha$ Me               | Me                  | H  | — | <i>Salvia<br/>divinorum</i>      | <i>J. Nat. Prod.</i> , 2003, <b>66</b> , 1242-1244           |
| 406 | divinatorin B                                                  | $\alpha$ OH | CO <sub>2</sub> Me | $\alpha$ Me               | CH <sub>2</sub> OH  | H  | — |                                  |                                                              |
| 407 | divinatorin C                                                  | H           | CO <sub>2</sub> H  | $\alpha$ Me               | CH <sub>2</sub> OAc | H  | — |                                  |                                                              |
| 408 | (-)-hardwickiic acid                                           | H           | CO <sub>2</sub> H  | $\alpha$ Me               | Me                  | H  | — |                                  |                                                              |
| 409 | divinatorin D                                                  | $\alpha$ OH | CO <sub>2</sub> Me | $\alpha$ Me               | CH <sub>2</sub> OAc | H  | — | <i>Salvia<br/>divinorum</i>      | <i>Bioorg. Med. Chem.</i> , 2005, <b>13</b> ,<br>5635-5639   |
| 410 | divinatorin E                                                  | $\alpha$ OH | CO <sub>2</sub> Me | $\alpha$ Me               | CHO                 | H  | — | <i>Conyza<br/>hypoleuca</i>      | <i>Phytochemistry</i> 1991, <b>30</b> , 575-581              |
| 411 | 12-hydroxyhardwickiic acid                                     | H           | CO <sub>2</sub> H  | $\alpha$ Me               | Me                  | OH | — |                                  |                                                              |
| 412 | 12,17-dihydroxyhardwickiic acid methyl ester                   | H           | CO <sub>2</sub> Me | $\alpha$ Me               | CH <sub>2</sub> OH  | OH | — | <i>Chrysocoma<br/>coma aurea</i> | <i>Phytochemistry</i> , 1991, <b>30</b> , 607-609            |
| 413 | 15,16-epoxy- <i>cis</i> -cleroda-3,13(16),14-trien-19-oic acid | H           | Me                 | $\beta$ CO <sub>2</sub> H | Me                  | H  | — |                                  |                                                              |
| 414 | crotomembranafuran                                             | H           | CO <sub>2</sub> Me | $\alpha$ Me               | CO <sub>2</sub> Me  | =O | — | <i>Croton<br/>membranaceus</i>   | <i>Nat. Prod. Commun.</i> , 2008, <b>3</b> ,<br>1875-1878    |
| 415 | 1,2,11,12E-tetrahydrohardwickiic acid                          | —           | —                  | —                         | —                   | —  | — | <i>Conyza<br/>hypoleuca</i>      | <i>Phytochemistry</i> 1991, <b>30</b> , 575-581              |
| 416 | 2 $\alpha$ -hydroxy-11,12E-dehydrohardwickiic acid             | $\alpha$ OH | CO <sub>2</sub> H  | —                         | —                   | —  | — |                                  |                                                              |
| 417 | dehydrohardwickiic acid                                        | H           | CO <sub>2</sub> H  | —                         | —                   | —  | — | <i>Eremocarpus<br/>setigerus</i> | <i>Indian J. Chem. B</i> , 1991, <b>30</b> , 1054-1055       |
| 418 | crotonoligaketone                                              | —           | —                  | —                         | —                   | —  | — | <i>Croton<br/>oligandrum</i>     | <i>Z. Naturforsch. C</i> , 2014, <b>69</b> , 181-185         |
| 419 | eluterin B                                                     | —           | —                  | —                         | —                   | —  | — | <i>Croton<br/>eluteria</i>       | <i>J. Agric. Food Chem.</i> , 2002, <b>50</b> ,<br>5131-5138 |

### 2.2.2. Type II Subtype IIb without a Decalin C=C Double Bond (Table 12)

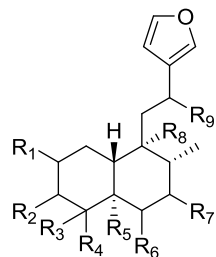

420-427

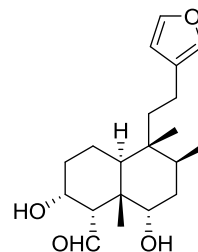

428

| No. | Compound Name                                                                   | R <sub>1</sub> | R <sub>2</sub> | R <sub>3</sub> | R <sub>4</sub>            | R <sub>5</sub>     | R <sub>6</sub> | R <sub>7</sub> | R <sub>8</sub>      | R <sub>9</sub> | Source                      | Ref.                                                      |
|-----|---------------------------------------------------------------------------------|----------------|----------------|----------------|---------------------------|--------------------|----------------|----------------|---------------------|----------------|-----------------------------|-----------------------------------------------------------|
| 420 | crotonolide H                                                                   | H              | $\alpha$ OH    | $\beta$ OH     | Me                        | Me                 | H              | H              | Me                  | $\beta$ OH     | <i>Croton laui</i>          | <i>J. Nat. Prod.</i> , 2014, <b>77</b> , 1013-1020        |
| 421 | 12-deoxycrotonolide H                                                           | H              | $\alpha$ OH    | $\beta$ OH     | Me                        | Me                 | H              | H              | Me                  | H              |                             |                                                           |
| 422 | crolechnic acid                                                                 | H              | H              | H              | $\beta$ CO <sub>2</sub> H | Me                 | H              | H              | Me                  | H              | <i>Croton lechleri</i>      | <i>Phytochemistry</i> , 1993, <b>32</b> , 755-760         |
| 423 | teumassilenin A                                                                 | H              | H              | H              | $\beta$ CHO               | CH <sub>2</sub> OH | $\alpha$ OH    | H              | Me                  | $\beta$ OH     | <i>Teucrium massiliense</i> | <i>J. Nat. Prod.</i> , 1998, <b>61</b> , 1242-1247        |
| 424 | cascarilladione                                                                 | =O             | H              | H              | $\alpha$ Me               | Me                 | H              | H              | Me                  | =O             | <i>Croton eluteria</i>      | <i>J. Agric. Food Chem.</i> , 2003, <b>51</b> , 6970-6974 |
| 425 | eluterin A                                                                      | H              | =O             | H              | $\beta$ Me                | Me                 | H              | $\alpha$ OAc   | CH <sub>2</sub> OAc | H              |                             | <i>J. Agric. Food Chem.</i> , 2002, <b>50</b> , 5131-5138 |
| 426 | 3,12-dioxo-15,16-epoxy-cleroda-13(16),14-dien-9-al                              | H              | =O             | H              | $\beta$ Me                | Me                 | H              | H              | CHO                 | =O             | <i>Croton hovarum</i>       | <i>Phytochemistry</i> , 1997, <b>45</b> , 379-381         |
| 427 | 3 $\alpha$ ,4 $\beta$ -dihydroxy-15,16-epoxy-12-oxo-cleroda-13(16),14-dien-9-al | H              | $\alpha$ OH    | $\beta$ OH     | $\alpha$ Me               | Me                 | H              | H              | CHO                 | =O             |                             | <i>Phytochemistry</i> , 1996, <b>41</b> , 561-563         |
| 428 | nepetalan                                                                       | —              | —              | —              | —                         | —                  | —              | —              | —                   | —              | <i>Nepeta juncea</i>        | <i>Magn. Reson. Chem.</i> , 2009, <b>47</b> , 625-627     |

### 2.3. Type II Subtype III with a Tetrahydrofuran Ring (Table 13)

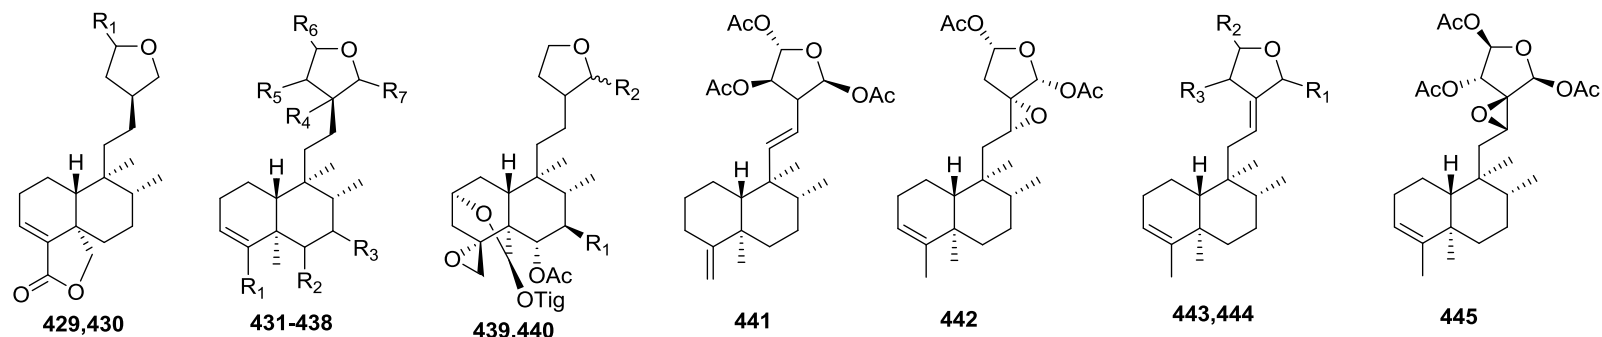

| No. | Compound Name                                                                        | R <sub>1</sub>           | R <sub>2</sub> | R <sub>3</sub> | R <sub>4</sub> | R <sub>5</sub> | R <sub>6</sub> | R <sub>7</sub> | Source                          | Ref.                                                                                                      |
|-----|--------------------------------------------------------------------------------------|--------------------------|----------------|----------------|----------------|----------------|----------------|----------------|---------------------------------|-----------------------------------------------------------------------------------------------------------|
| 429 | trinerolide                                                                          | αOMe                     | —              | —              | —              | —              | —              | —              | <i>Baccharis trinervis</i>      | <i>Phytochemistry</i> , 1993, <b>34</b> , 1377-1384                                                       |
| 430 | 15-epitrinerolide                                                                    | βOMe                     | —              | —              | —              | —              | —              | —              |                                 |                                                                                                           |
| 431 | 18-acetyl-7α-hydroxy-epimethyl-trineracetal                                          | CH <sub>2</sub> OAc      | H              | αOH            | H              | H              | βOMe           | H              |                                 |                                                                                                           |
| 432 | 18-methylmalonyl-7α-hydrox-methyl-trineracetal                                       | CH <sub>2</sub> OMe-malo | H              | αOH            | H              | H              | αOMe           | H              |                                 |                                                                                                           |
| 433 | 18-methylmalonyl-7α-hydroxy-epimethyl-trineracetal                                   | CH <sub>2</sub> OMe-malo | H              | αOH            | H              | H              | βOMe           | H              |                                 |                                                                                                           |
| 434 | 15,16-epoxy-7α,18-dihydroxy-15-methoxy- <i>ent</i> -clerod-3-ene                     | CH <sub>2</sub> OH       | H              | αOH            | H              | H              | OMe            | H              | <i>Baccharis articulata</i>     | <i>Phytochemistry</i> , 1993, <b>34</b> , 1087-1090                                                       |
| 435 | 15,16-epoxy-15α-methoxy- <i>ent</i> -clerod-3-en-18-oic acid                         | COOH                     | H              | H              | H              | H              | αOMe           | H              | <i>Baccharis gaudichaudiana</i> | <i>J. Nat. Prod.</i> , 2006, <b>69</b> , 274-276                                                          |
| 436 | 13- <i>epi</i> -15,16-epoxy-15α-methoxy- <i>ent</i> -clerod-3-en-18-oic acid         | COOH                     | H              | H              | H              | H              | βOMe           | H              |                                 |                                                                                                           |
| 437 | visclerodol acid                                                                     | CO <sub>2</sub> H        | H              | H              | OH             | βOH            | βOAc           | βOAc           | <i>Dodonaea viscosa</i>         | <i>Z. Naturforsch. B</i> , 2010, <b>65</b> , 83-86<br><i>Phytochem. Lett.</i> , 2014, <b>8</b> , 10-15    |
| 438 | 13,14-dihydroxy-15,16-dimethoxy-(-)-6α-hydroxy-5α,8α,9α,10α-cleroda-3-en-18-oic acid | CO <sub>2</sub> H        | αOH            | H              | OH             | βOH            | βOMe           | βOMe           | <i>Scutellaria galericulata</i> | <i>Phytochemistry</i> , 1993, <b>33</b> , 309-315,<br><i>Phytochemistry</i> , 1996, <b>41</b> , 247-253   |
| 439 | scutegalin B                                                                         | OH                       | βOH            | —              | —              | —              | —              | —              |                                 |                                                                                                           |
| 440 | scutegalin C                                                                         | OTig                     | OH             | —              | —              | —              | —              | —              |                                 |                                                                                                           |
| 441 | 14,15,16-triacetoxy-15,16-epoxy- <i>ent</i> -cleroda-4(18),12 <i>E</i> -diene        | —                        | —              | —              | —              | —              | —              | —              |                                 |                                                                                                           |
| 442 | 15,16-diacetoxy-12,13-15,16-diepoxy- <i>ent</i> -cleroda-3-ene                       | —                        | —              | —              | —              | —              | —              | —              |                                 |                                                                                                           |
| 443 | 14,15,16-triacetoxy-15,16-epoxy- <i>ent</i> -cleroda-3,12 <i>Z</i> -diene            | βOAc                     | αOAc           | βOAc           | —              | —              | —              | —              | <i>Linaria saxatilis</i>        | <i>Phytochemistry</i> , 1993, <b>33</b> , 631-633,<br><i>Phytochemistry</i> , 1995, <b>40</b> , 1307-1309 |
| 444 | 15,16-diacetoxy-15,16-epoxy- <i>neo</i> -cleroda-3,13 <i>Z</i> -diene                | OAc                      | OAc            | H              | —              | —              | —              | —              |                                 |                                                                                                           |
| 445 | 15,16-diacetoxy-12,13-15,16-diepoxy-14-hydroxy- <i>neo</i> -cleroda-3-ene            | —                        | —              | —              | —              | —              | —              | —              |                                 |                                                                                                           |

### 3. Type III with a 3-Ethyl-2-butenolide-based Side Chain at C-9

#### 3.1. Type III Subtype I with *O*-Containing Rings

##### 3.1.1. Type III Subtype Ia with Five-Membered Cyclic *O*-Containing Rings (Table 14)

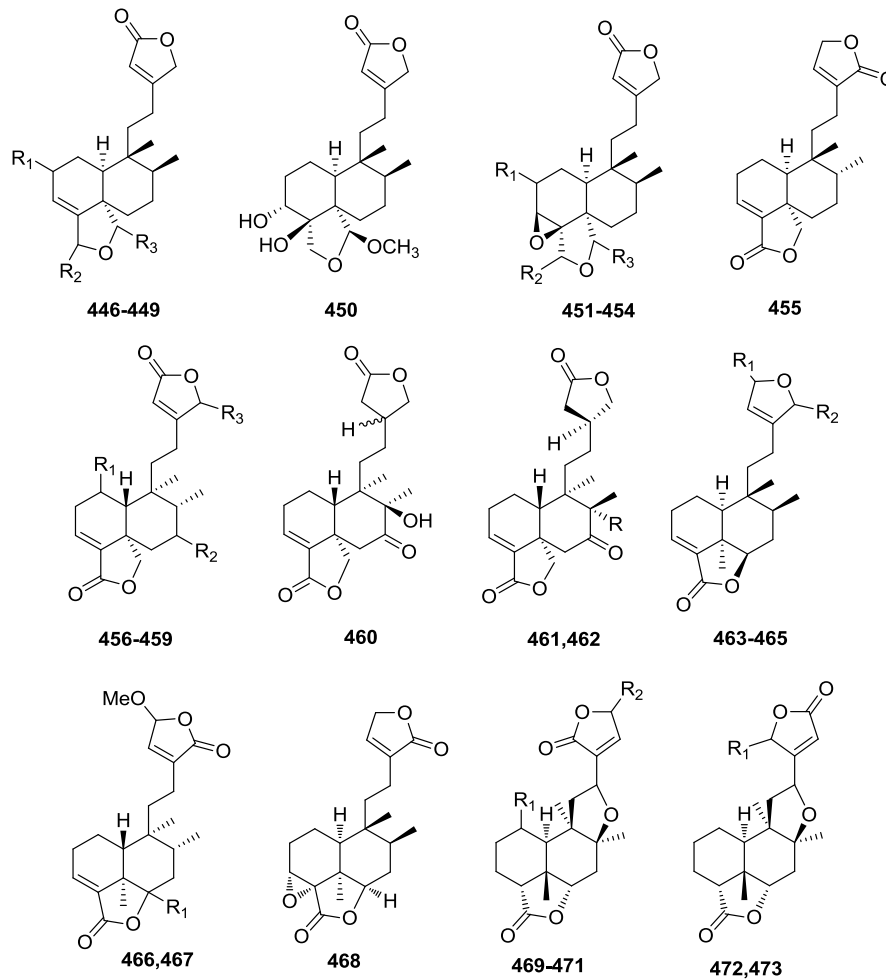

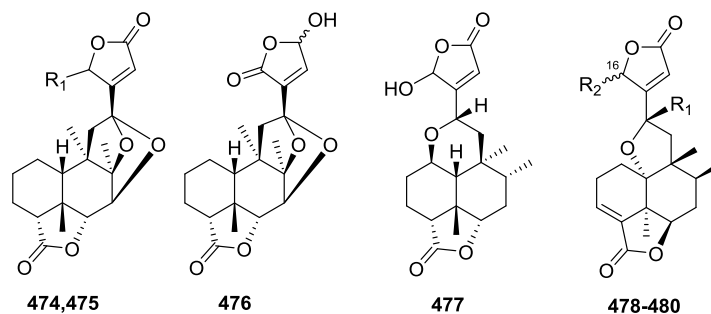

| No. | Compound Name                                                  | R <sub>1</sub> | R <sub>2</sub> | R <sub>3</sub> | Source                             | Ref.                                                                                                                                                      |
|-----|----------------------------------------------------------------|----------------|----------------|----------------|------------------------------------|-----------------------------------------------------------------------------------------------------------------------------------------------------------|
| 446 | amphiacrolide A                                                | H              | H              | =O             | <i>Amphiachyris dracunculoides</i> | <i>J. Nat. Prod.</i> , 1990, <b>53</b> , 1312-1326,<br><i>J. Nat. Prod.</i> , 1996, <b>59</b> , 463-468,<br><i>J. Nat. Prod.</i> , 1996, <b>59</b> , 5-14 |
| 447 | amphiacrolide B                                                | H              | =O             | H              |                                    |                                                                                                                                                           |
| 448 | amphiacrolide C                                                | H              | H              | OH             |                                    |                                                                                                                                                           |
| 449 | amphiacrolide L                                                | βOH            | =O             | H              |                                    |                                                                                                                                                           |
| 450 | amphiacrolide J                                                | —              | —              | —              |                                    |                                                                                                                                                           |
| 451 | amphiacrolide D                                                | H              | H              | OH             |                                    |                                                                                                                                                           |
| 452 | amphiacrolide M                                                | βOH            | H              | βOH            |                                    |                                                                                                                                                           |
| 453 | amphiacrolide E                                                | H              | αOEt           | αOH            |                                    |                                                                                                                                                           |
| 454 | amphiacrolide I                                                | H              | αOMe           | αOH            |                                    |                                                                                                                                                           |
| 455 | cleroda-3,13(14)-dien-16,15:18,19-diolide                      | —              | —              | —              | <i>Solidago virgaurea</i>          | <i>Phytochemistry</i> , 2010, <b>71</b> , 104–109                                                                                                         |
| 456 | Mkapwanin                                                      | H              | H              | H              | <i>Dodonaea angustifolia</i>       | <i>Phytochem. Lett.</i> , 2010, <b>3</b> , 217–220                                                                                                        |
| 457 | 15-methoxymkapwanin                                            | H              | H              | OMe            |                                    |                                                                                                                                                           |
| 458 | 1α,7α-dihydroxyneocleroda-3,13-dien-16,15:18,19-diolide        | αOH            | αOH            | H              | <i>Baccharis crispa</i>            | <i>J. Nat. Prod.</i> , 1997, <b>60</b> , 490-492                                                                                                          |
| 459 | 1α,7α,15-trihydroxyneocleroda-3,13-dien-16,15:18,19-diolide    | αOH            | αOH            | OH             |                                    |                                                                                                                                                           |
| 460 | 8β-hydroxy-7-oxo-ent-cleroda-3-en-15,18-diacid-16,19-dilactone | —              | —              | —              | <i>Baccharis articulate</i>        | <i>Phytochemistry</i> , 1993, <b>34</b> , 1087-1090                                                                                                       |
| 461 | gaudichanolide A                                               | OH             | —              | —              | <i>Baccharis gaudichaudiana</i>    | <i>J. Nat. Prod.</i> , 2005, <b>68</b> , 1121-1124                                                                                                        |
| 462 | gaudichanolide B                                               | H              | —              | —              |                                    |                                                                                                                                                           |
| 463 | cephaloziellin C                                               | =O             | OH             | —              | <i>Cephaloziella kiaeri</i>        | <i>J. Nat. Prod.</i> , 2013, <b>76</b> , 1700-1708                                                                                                        |
| 464 | cephaloziellin D                                               | OH             | =O             | —              |                                    |                                                                                                                                                           |
| 465 | amphiacrolide F                                                | =O             | H              | —              | <i>Amphiachyris dracunculoides</i> | <i>J. Nat. Prod.</i> , 1996, <b>59</b> , 5-14                                                                                                             |
| 466 | ballatenolide A                                                | αH             | —              | —              | <i>Ballota limbata</i>             | <i>Helv. Chim. Acta</i> , 2004, <b>87</b> , 682-689                                                                                                       |



|     |                                                                                                                                |              |             |   |                                   |                                                         |
|-----|--------------------------------------------------------------------------------------------------------------------------------|--------------|-------------|---|-----------------------------------|---------------------------------------------------------|
| 467 | limbatolide A                                                                                                                  | $\beta$ H    | —           | — | <i>Ostegia limbata</i>            | <i>Chem. Pharm. Bull.</i> , 2005, <b>53</b> , 378-381   |
| 468 | crispene E                                                                                                                     | —            | —           | — | <i>Tinospora crispa</i>           | <i>Org. Biomol. Chem.</i> , 2015, <b>13</b> , 3882-3886 |
| 469 | 1 $\alpha$ -acetoxy-8 $\beta$ ,12-epoxy-15-hydroxy- <i>cis-ent</i> -cleroda-13-en-16,15:18 $\alpha$ ,6 $\alpha$ -diolide       | $\alpha$ OAc | OH          | — | <i>Adelanthus lindenbergianus</i> | <i>Phytochemistry</i> , 2004, <b>65</b> , 127–137       |
| 470 | 8 $\beta$ ,12-epoxy-15 $\alpha$ -hydroxy-transcleroda-13-en-16,15:18 $\alpha$ ,6 $\alpha$ -diolide                             | H            | $\alpha$ OH | — |                                   |                                                         |
| 471 | 8 $\beta$ ,12-epoxy-15 $\beta$ -hydroxy-transcleroda-13-en-16,15:18 $\alpha$ ,6 $\alpha$ -diolide                              | H            | $\beta$ OH  | — |                                   |                                                         |
| 472 | 8 $\beta$ ,12-epoxy-16 $\alpha$ -hydroxy-transcleroda-13-en-15,16:18 $\alpha$ ,6 $\alpha$ -diolide                             | $\alpha$ OH  | —           | — |                                   |                                                         |
| 473 | 8 $\beta$ ,12-epoxy-16 $\beta$ -hydroxy-transcleroda-13-en-15,16:18 $\alpha$ ,6 $\alpha$ -diolide                              | $\beta$ OH   | —           | — |                                   |                                                         |
| 474 | 7 $\beta$ ,12:8 $\beta$ ,12-diepoxy-16 $\alpha$ -hydroxy- <i>cis-ent</i> -cleroda-13-en-15,16:18 $\alpha$ ,6 $\alpha$ -diolide | $\alpha$ OH  | —           | — |                                   |                                                         |
| 475 | 7 $\beta$ ,12:8 $\beta$ ,12-diepoxy-16 $\beta$ -hydroxy- <i>cis-ent</i> -cleroda-13-en-15,16:18 $\alpha$ ,6 $\alpha$ -diolide  | $\beta$ OH   | —           | — |                                   |                                                         |
| 476 | 7 $\beta$ ,12:8 $\beta$ ,12-diepoxy-15-hydroxy- <i>cis-ent</i> -cleroda-13-en-16,15:18 $\alpha$ ,6 $\alpha$ -diolide           | —            | —           | — |                                   |                                                         |
| 477 | 1 $\beta$ ,12-epoxy-16-hydroxy- <i>cis-ent</i> -cleroda-13-en-15,16:18 $\alpha$ ,6 $\alpha$ -diolide                           | —            | —           | — |                                   |                                                         |
| 478 | ciliatolide B                                                                                                                  | OEt          | OH          | — | <i>Scapania ciliata</i>           | <i>Chem. Biodivers.</i> , 2013, <b>10</b> , 1606-1612   |
| 479 | ciliatolide C                                                                                                                  | OMe          | OH          | — |                                   |                                                         |
| 480 | ciliatolide D                                                                                                                  | OEt          | OEt         | — |                                   |                                                         |

### 2.3.1.2 Type III Subtype Ib with Other O-Containing Rings (Table 15)

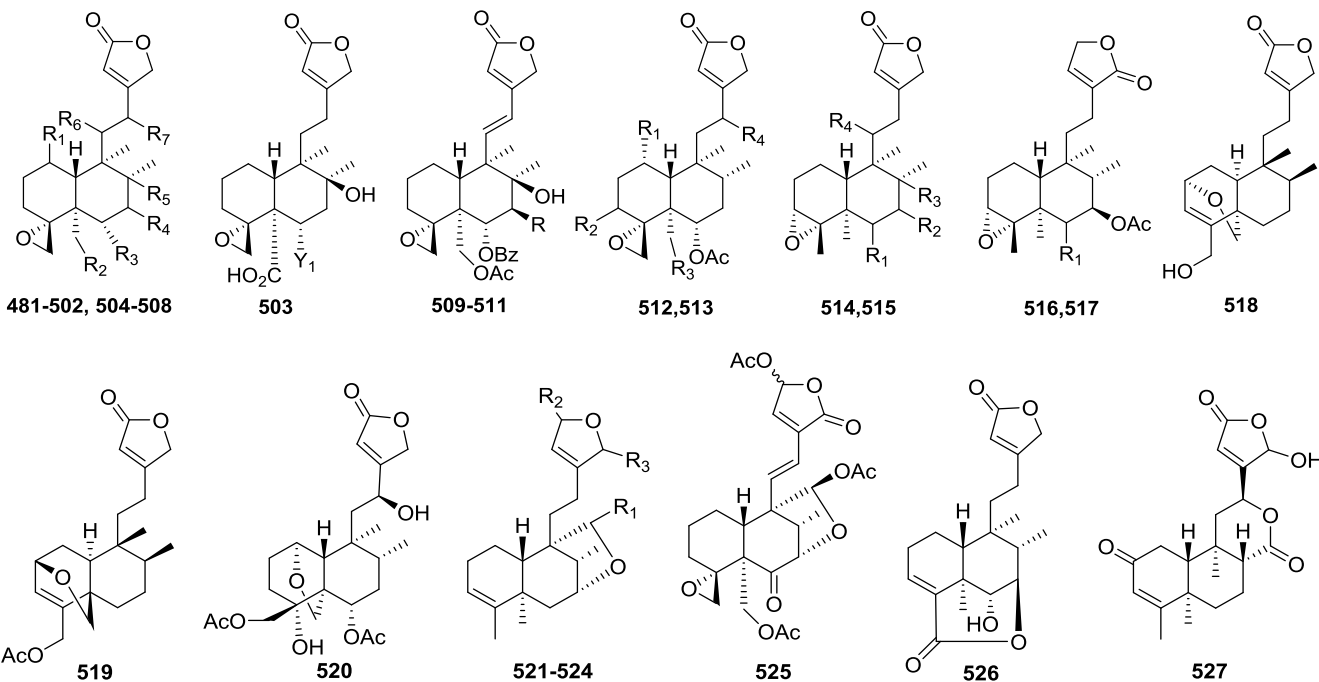

| No. | Compound Name                                                                                                          | R <sub>1</sub>  | R <sub>2</sub> | R <sub>3</sub> | R <sub>4</sub> | R <sub>5</sub> | R <sub>6</sub> | R <sub>7</sub>   | Source                        | Ref.                                                |
|-----|------------------------------------------------------------------------------------------------------------------------|-----------------|----------------|----------------|----------------|----------------|----------------|------------------|-------------------------------|-----------------------------------------------------|
| 481 | scutorientalin C                                                                                                       | H               | OH             | OiBu           | H              | βOH            | βOAc           | H                | <i>Scutellaria orientalis</i> | <i>Phytochemistry</i> , 1996, <b>43</b> , 173-178   |
| 482 | scutalpin H                                                                                                            | H               | OAc            | Y <sub>1</sub> | βH             | βOH            | βOAc           | H                | <i>Scutellaria alpina</i>     | <i>Phytochemistry</i> , 1995, <b>38</b> , 181-187   |
| 483 | scutalpin I                                                                                                            | H               | OAc            | OBz            | βH             | βOH            | βOAc           | H                |                               |                                                     |
| 484 | scutalpin L                                                                                                            | H               | OAc            | OBz            | βOBz           | βOH            | βH             | H                |                               |                                                     |
| 485 | (12 <i>S</i> )-6 <i>α</i> -acetoxy-4 <i>α</i> ,18-epoxy-12-hydroxy-19-tigloyloxy- <i>neo</i> -clerod-13-en-15,16-olide | H               | OTig           | OAc            | H              | H              | H              | βOH              | <i>Ajuga ciliata</i>          | <i>Phytochem. Lett.</i> , 2012, <b>5</b> , 563-566  |
| 486 | scutalpin N                                                                                                            | H               | OAc            | OBz            | βOBz           | βOH            | H              | H                | <i>Scutellaria alpine</i>     | <i>Phytochemistry</i> , 1998, <b>49</b> , 2449-2452 |
| 487 | ajugapantin A                                                                                                          | βOAc            | OAc            | OAc            | H              | H              | H              | αOAc             | <i>Ajuga pantantha</i>        | <i>Phytochemistry</i> , 1993, <b>34</b> , 1091-1094 |
| 488 | ajugamacrin C                                                                                                          | βOiBu           | OAc            | OAc            | H              | H              | H              | αOiBu            |                               |                                                     |
| 489 | ajugamacrin D                                                                                                          | βOiBu           | OAc            | OAc            | H              | H              | H              | αOY <sub>1</sub> |                               |                                                     |
| 490 | ajugamacrin E                                                                                                          | βY <sub>1</sub> | OAc            | OAc            | H              | H              | H              | αOiBu            |                               |                                                     |

|     |                                                                                                                     |                |             |                 |                        |            |             |                        |                                    |                                                                                                             |
|-----|---------------------------------------------------------------------------------------------------------------------|----------------|-------------|-----------------|------------------------|------------|-------------|------------------------|------------------------------------|-------------------------------------------------------------------------------------------------------------|
| 491 | ajugamacrin A                                                                                                       | $\beta$ OAc    | OAc         | OAc             | H                      | H          | H           | $\beta$ iBu            | <i>Ajuga macrosperma</i>           | <i>Phytochemistry</i> , 1993, <b>33</b> , 887-889                                                           |
| 492 | ajugamacrin B                                                                                                       | $\beta$ OAc    | OAc         | OAc             | H                      | H          | H           | $\beta$ Y <sub>1</sub> |                                    |                                                                                                             |
| 493 | ajugatakasin A                                                                                                      | OTig           | OAc         | OAc             | H                      | H          | H           | OTig                   | <i>Ajuga decumbens</i>             | <i>Biosci. Biotechnol. Biochem.</i> , 1997, <b>61</b> , 1518-1522                                           |
| 494 | ajugatakasin B                                                                                                      | Y <sub>1</sub> | OAc         | OAc             | H                      | H          | H           | Y <sub>1</sub>         |                                    |                                                                                                             |
| 495 | ajugamarin L2                                                                                                       | H              | OTig        | OH              | H                      | H          | H           | H                      | <i>Ajuga nipponensis</i>           | <i>Chin. Chem. Lett.</i> , 1995, <b>6</b> , 581-582                                                         |
| 496 | (4S,11S)-11-acetoxy-8 $\beta$ ,19-dihydroxy-6 $\alpha$ -tigloyloxy-4,18-epoxy- <i>neo</i> -clerod-13-en-15,16-olide | H              | OH          | OTig            | H                      | $\beta$ OH | OAc         | H                      | <i>Scutellaria alpina</i>          | <i>Yakugaku Zasshi</i> , 1994, <b>114</b> , 264-271,<br><i>Phytochemistry</i> , 1993, <b>34</b> , 1589-1594 |
| 497 | scutalpin C                                                                                                         | H              | OAc         | OTig            | H                      | OH         | $\beta$ OH  | H                      |                                    |                                                                                                             |
| 498 | scupolin A                                                                                                          | H              | OH          | Y <sub>1</sub>  | H                      | $\beta$ OH | $\beta$ OAc | H                      | <i>Scutellaria polyodon</i>        | <i>J. Nat. Prod.</i> , 1997, <b>60</b> , 1229-1235                                                          |
| 499 | scupolin B                                                                                                          | H              | OAc         | OAc             | H                      | $\beta$ OH | $\beta$ OAc | H                      |                                    |                                                                                                             |
| 500 | scupolin C                                                                                                          | H              | OBz         | OBz             | H                      | $\beta$ OH | $\beta$ OAc | H                      |                                    |                                                                                                             |
| 501 | scupolin D                                                                                                          | H              | OH          | OH              | $\beta$ Y <sub>1</sub> | $\beta$ OH | $\beta$ OAc | H                      |                                    |                                                                                                             |
| 502 | scupolin E                                                                                                          | H              | OH          | Y <sub>1</sub>  | $\beta$ OH             | $\beta$ OH | $\beta$ OAc | H                      |                                    |                                                                                                             |
| 503 | scupolin F                                                                                                          | —              | —           | —               | —                      | —          | —           | —                      |                                    |                                                                                                             |
| 504 | scutorientalin E                                                                                                    | H              | OAc         | OCin            | $\beta$ OAc            | $\beta$ OH | H           | H                      | <i>Scutellaria orientalis</i>      | <i>Phytochemistry</i> 1997, <b>46</b> , 587-589                                                             |
| 505 | hastifolin A                                                                                                        | H              | H           | OCin            | H                      | $\beta$ OH | H           | H                      | <i>Scutellaria hastifolia</i>      | <i>Phytochemistry</i> , 2010, <b>71</b> , 2087-2091                                                         |
| 506 | ajugalide A                                                                                                         | $\beta$ OH     | OAc         | OAc             | H                      | H          | H           | $\alpha$ OAc           | <i>Ajuga taiwanensis</i>           | <i>Chem. Pharm. Bull.</i> , 2005, <b>53</b> , 164-167                                                       |
| 507 | ajugalide B                                                                                                         | $\beta$ OAc    | OAc         | OAc             | H                      | H          | H           | $\alpha$ OH            |                                    |                                                                                                             |
| 508 | ajugalide C                                                                                                         | H              | OAc         | OAc             | H                      | H          | H           | $\alpha$ OH            |                                    |                                                                                                             |
| 509 | (4S)-19-acetoxy-8 $\beta$ -hydroxy-6 $\alpha$ -tigloyloxy-4,18-epoxy- <i>neo</i> -cleroda-11,13-dien-15,16-olide    | $\alpha$ OTig  | H           | —               | —                      | —          | —           | —                      | <i>Scutellaria alpina</i>          | <i>Yakugaku Zasshi</i> , 1994, <b>114</b> , 264-271<br><i>Phytochemistry</i> , 1995, <b>38</b> , 181-187    |
| 510 | scutalpin J                                                                                                         | $\alpha$ OBz   | H           | —               | —                      | —          | —           | —                      |                                    |                                                                                                             |
| 511 | scutalpin K                                                                                                         | $\alpha$ OBz   | $\beta$ OBz | —               | —                      | —          | —           | —                      |                                    |                                                                                                             |
| 512 | ajugacumbin E                                                                                                       | OAc            | $\beta$ OAc | X <sub>12</sub> | H                      | —          | —           | —                      | <i>Ajuga decumbens</i>             | <i>Chem. Pharm. Bull.</i> , 1990, <b>38</b> , 3167-3168                                                     |
| 513 | 3 $\alpha$ -hydroxyajugamarin F4                                                                                    | H              | $\alpha$ OH | OAc             | $\beta$ Y <sub>1</sub> | —          | —           | —                      | <i>Ajuga reptans</i>               | <i>Phytochemistry</i> , 1998, <b>47</b> , 1227-1232                                                         |
| 514 | scuterivulactone A                                                                                                  | $\alpha$ OBz   | H           | $\beta$ OH      | $\beta$ OAc            | —          | —           | —                      | <i>Scutellaria rivularis</i>       | <i>Chem. Pharm. Bull.</i> , 1997, <b>45</b> , 152-160                                                       |
| 515 | seguiniilactone A                                                                                                   | $\alpha$ OAc   | $\beta$ OAc | H               | H                      | —          | —           | —                      | <i>Colquhounia seguinii</i>        | <i>J. Integr. Plant Biol.</i> , 2014, <b>56</b> , 928-940                                                   |
| 516 | seguiniilactone B                                                                                                   | $\alpha$ OAc   | —           | —               | —                      | —          | —           | —                      |                                    |                                                                                                             |
| 517 | seguiniilactone C                                                                                                   | H              | —           | —               | —                      | —          | —           | —                      |                                    |                                                                                                             |
| 518 | amphiacrolide K                                                                                                     | —              | —           | —               | —                      | —          | —           | —                      | <i>Amphiachyris dracunculoides</i> | <i>J. Nat. Prod.</i> , 1996, <b>59</b> , 463-468                                                            |
| 519 | Conyzalactone                                                                                                       | —              | —           | —               | —                      | —          | —           | —                      | <i>Conyza blinii</i>               | <i>Heterocycles</i> , 1999, <b>51</b> , 605-609                                                             |

|     |                                                                                                                             |     |     |    |   |   |   |   |                                |                                                                      |
|-----|-----------------------------------------------------------------------------------------------------------------------------|-----|-----|----|---|---|---|---|--------------------------------|----------------------------------------------------------------------|
| 520 | (12 <i>S</i> )-1 $\alpha$ ,19-epoxy-6 $\alpha$ ,18-diacetoxy-4 $\alpha$ ,12-dihydroxy- <i>neo</i> -clerod-13-en-15,16-olide | —   | —   | —  | — | — | — | — | <i>Ajuga decumbens</i>         | <i>Fitoterapia</i> , 2012, <b>83</b> , 1409-1414                     |
| 521 | ptycholide I                                                                                                                | =O  | OMe | =O | — | — | — | — | <i>Ptychopetalum olacoides</i> | <i>Nat. Prod. Commun.</i> , 2011, <b>6</b> , 327-332                 |
| 522 | ptycholide II                                                                                                               | OMe | OMe | =O | — | — | — | — |                                |                                                                      |
| 523 | ptycholide III                                                                                                              | OMe | H   | =O | — | — | — | — |                                |                                                                      |
| 524 | ptycholide IV                                                                                                               | OMe | =O  | OH | — | — | — | — |                                |                                                                      |
| 525 | Teucrasiolide                                                                                                               | —   | —   | —  | — | — | — | — | <i>Teucrium asiaticum</i>      | <i>Phytochemistry</i> , 1997, <b>45</b> , 383-385                    |
| 526 | 6 $\alpha$ -hydroxycleroda-3,13-dien-15(16), 4(7)-diolide                                                                   | —   | —   | —  | — | — | — | — | <i>Pulicaria wightiana</i>     | <i>Helv. Chim. Acta.</i> , 2008, <b>91</b> , 2081-2088               |
| 527 | microdon B                                                                                                                  | —   | —   | —  | — | — | — | — | <i>Gomphostemma microdon</i>   | <i>Z. Naturforsch., B: J. Chem. Sci.</i> , 2009, <b>64</b> , 443-446 |

### 3.2.1. Type III Subtype IIa with C3/C4 Double Bond (Table 16)

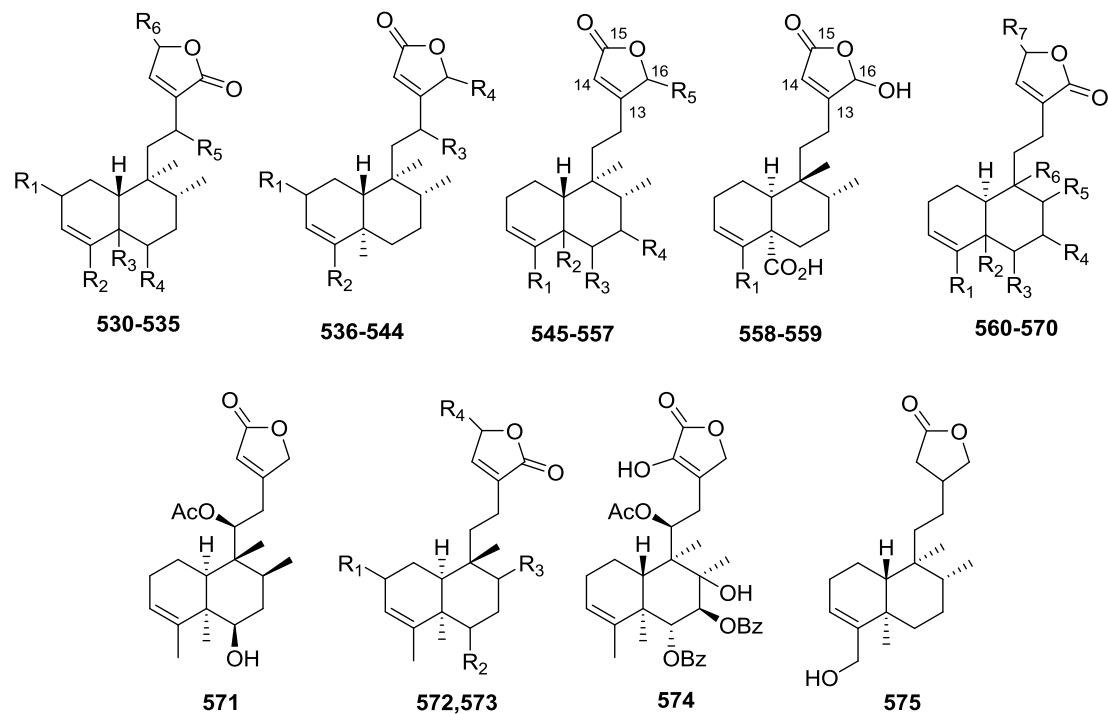

| No. | Compound Name                                                                                                      | R <sub>1</sub> | R <sub>2</sub>     | R <sub>3</sub>              | R <sub>4</sub> | R <sub>5</sub> | R <sub>6</sub> | R <sub>7</sub> | Source                           | Ref.                                                  |
|-----|--------------------------------------------------------------------------------------------------------------------|----------------|--------------------|-----------------------------|----------------|----------------|----------------|----------------|----------------------------------|-------------------------------------------------------|
| 530 | <i>ent</i> -2 $\beta$ ,18,19-trihydroxycleroda-3,13-dien-16,15-olide                                               | $\alpha$ OH    | CH <sub>2</sub> OH | $\alpha$ CH <sub>2</sub> OH | H              | H              | H              | —              | <i>Crassocephalum bauchiense</i> | <i>Nat. Prod. Res.</i> , 2015, <b>29</b> , 1990-1994  |
| 531 | (-)-6 $\alpha$ -hydroxy-5 $\alpha$ ,8 $\alpha$ ,9 $\alpha$ ,10 $\alpha$ -cleroda-3,13-dien-16,15-olid-18-oic acid* | H              | CO <sub>2</sub> H  | $\alpha$ Me                 | $\alpha$ OH    | H              | H              | —              | <i>Dodonaea viscosa</i>          | <i>Phytochem. Lett.</i> , 2014, <b>8</b> , 10-15      |
| 532 | 15-hydroxy-16-oxo-15,16H-hardwickiic acid                                                                          | H              | CO <sub>2</sub> H  | $\alpha$ Me                 | H              | H              | OH             | —              | <i>Grangea maderaspatana</i>     | <i>Phytochemistry</i> , 1999, <b>52</b> , 1341-1343   |
| 533 | limbatolide B                                                                                                      | H              | CO <sub>2</sub> H  | $\beta$ Me                  | H              | H              | OMe            | —              | <i>Otostegia limbata</i>         | <i>Chem. Pharm. Bull.</i> , 2005, <b>53</b> , 378-381 |
| 534 | limbatolide C                                                                                                      | H              | CO <sub>2</sub> H  | $\beta$ Me                  | H              | H              | H              | —              |                                  |                                                       |
| 535 | 12( <i>S</i> )-hydroxycleroda-3,13-dien-16,15-olide                                                                | H              | Me                 | $\alpha$ Me                 | H              | $\beta$ OH     | H              | —              | <i>Callicarpa americana</i>      | <i>J. Nat. Prod.</i> , 2007, <b>70</b> , 372-377      |
| 536 | 12( <i>S</i> ),16 $\zeta$ -dihydroxycleroda-3,13-dien-15,16-olide                                                  | H              | Me                 | $\beta$ OH                  | OH             | —              | —              | —              |                                  |                                                       |
| 537 | 12( <i>S</i> )-hydroxy-16 $\zeta$ -methoxycleroda-3,13-dien-15,16-olide                                            | H              | Me                 | $\beta$ OH                  | OMe            | —              | —              | —              |                                  |                                                       |
| 538 | 12( <i>S</i> )-hydroxycleroda-3,13-dien-15,16-olide                                                                | H              | Me                 | $\beta$ OH                  | H              | —              | —              | —              |                                  |                                                       |

|       |                                                                            |                      |                     |     |      |      |     |     |                                             |                                                        |
|-------|----------------------------------------------------------------------------|----------------------|---------------------|-----|------|------|-----|-----|---------------------------------------------|--------------------------------------------------------|
| 539   | 2β-methoxy-cleroda-3,13-dien-18-carboxy-15,16-olide                        | OMe                  | CO <sub>2</sub> H   | H   | H    | —    | —   | —   | <i>Casearia sylvestris</i>                  | <i>Fitoterapia</i> , 2009, <b>80</b> , 404–407         |
| 540   | 16(R)-3,13Z-kolavadien-16,15-olide-2-one                                   | =O                   | Me                  | H   | αOH  | —    | —   | —   | <i>Polyalthia viridis</i>                   | <i>Phytochemistry</i> , 1990, <b>29</b> , 653-655      |
| 541   | 16(S)-3,13Z-kolavadien-16,15-olide-2-one                                   | =O                   | Me                  | H   | βOH  | —    | —   | —   |                                             |                                                        |
| 542   | polylongifoliaon A                                                         | =O                   | Me                  | H   | αOMe | —    | —   | —   | <i>P. longifolia</i> var.<br><i>pendula</i> | <i>RSC Advances</i> , 2014, <b>4</b> , 23707-23712     |
| 543   | polylongifoliaon B                                                         | =O                   | Me                  | H   | βOMe | —    | —   | —   |                                             |                                                        |
| 544   | 2β-(2-methylbutanoyl)cleroda-3,13-dien-15,16-olid-18-oic acid              | Y <sub>1</sub>       | CO <sub>2</sub> H   | H   | H    | —    | —   | —   | <i>Pulicaria wightiana</i>                  | <i>Helv. Chim. Acta.</i> , 2008, <b>91</b> , 2081-2088 |
| 545   | methyl 6-oxocleroda-3,13-dien-15,16-olid-18-oate                           | CO <sub>2</sub> Me   | αMe                 | =O  | H    | H    | —   | —   |                                             |                                                        |
| 546   | methyl 6α-hydroxycleroda-3,13-dien-15,16-olid-18-oate                      | CO <sub>2</sub> Me   | αMe                 | αOH | H    | H    | —   | —   |                                             |                                                        |
| 547   | methyl 6α,7α-dihydroxycleroda-3,13-dien-15,16-olid-18-oate                 | CO <sub>2</sub> Me   | αMe                 | αOH | αOH  | H    | —   | —   |                                             |                                                        |
| 548   | clerodermic acid                                                           | CO <sub>2</sub> H    | αMe                 | H   | H    | H    | —   | —   | <i>Clerodendrum inerm</i>                   | <i>Phytochemistry</i> , 1990, <b>29</b> , 3671-3673    |
| 549   | (-)-12,16-dihydroxy- <i>cis</i> -cleroda-3,13-dien-15-oic acid-15,16-olide | CO <sub>2</sub> H    | βMe                 | H   | H    | OH   | —   | —   | <i>Croton schiedeanus</i>                   | <i>Phytochemistry</i> , 1999, <b>51</b> , 643-649      |
| 550   | conyhypolide A                                                             | CO <sub>2</sub> H    | αMe                 | H   | αOH  | OH   | —   | —   | <i>Conyza hypoleuca</i>                     | <i>Phytochemistry</i> 1991, <b>30</b> , 575-581        |
| 551   | 16α-hydroxy-cleroda-3,13Z-diene-15,16-olide                                | Me                   | αMe                 | H   | H    | αOH  | —   | —   | <i>Polyalthia longifolia</i>                | <i>Fitoterapia</i> , 2005, <b>76</b> , 336-339         |
| 552   | 16α-methoxycleroda-3,13Z-dien-16,15-olide                                  | Me                   | αMe                 | H   | H    | αOMe | —   | —   |                                             | <i>J. Nat. Prod.</i> , 1992, <b>55</b> , 256-258       |
| 553   | 7-oxo- <i>ent</i> -clerodan-3,13-dien-15,16-olide                          | Me                   | αMe                 | H   | =O   | H    | —   | —   | <i>Platychaete aucheri</i>                  | <i>Phytochemistry</i> , 1990, <b>29</b> , 985-987      |
| 554   | 6-hydroxy-7-oxo- <i>ent</i> -clerodane-3,13-dien-15,16-olide               | Me                   | αMe                 | αOH | =O   | H    | —   | —   |                                             |                                                        |
| 555   | thymonin                                                                   | CH <sub>2</sub> OH   | αCH <sub>2</sub> OH | αOH | H    | H    | —   | —   | <i>Salvia thymoides</i>                     | <i>Phytochemistry</i> , 1997, <b>46</b> , 1249-1254    |
| 556   | 7β-hydroxythymonin                                                         | CH <sub>2</sub> OH   | αCH <sub>2</sub> OH | αOH | βOH  | H    | —   | —   |                                             |                                                        |
| 557   | souldiol                                                                   | CH <sub>2</sub> OH   | αCH <sub>2</sub> OH | H   | H    | H    | —   | —   | <i>Aster souliei</i>                        | <i>Chin. Chem. Lett.</i> , 1996, <b>7</b> , 619-620    |
| 558   | solidagoic acid H                                                          | Me                   | —                   | —   | —    | —    | —   | —   | <i>Solidago virgaurea</i>                   | <i>Phytochemistry</i> , 2010, <b>71</b> , 104–109      |
| 559   | solidagoic acid I                                                          | CH <sub>2</sub> OAng | —                   | —   | —    | —    | —   | —   |                                             |                                                        |
| 560   | solidagoic acid C                                                          | Me                   | αCO <sub>2</sub> H  | H   | H    | αMe  | βMe | H   |                                             |                                                        |
| 561   | solidagoic acid D                                                          | CH <sub>2</sub> OAng | αCO <sub>2</sub> H  | H   | H    | αMe  | βMe | H   |                                             |                                                        |
| 562   | solidagoic acid E                                                          | Me                   | αCO <sub>2</sub> H  | H   | H    | αMe  | βMe | OH  |                                             |                                                        |
| 563   | solidagoic acid F                                                          | CH <sub>2</sub> OAng | αCO <sub>2</sub> H  | H   | H    | αMe  | βMe | OH  |                                             |                                                        |
| 564   | solidagoic acid G                                                          | Me                   | αCO <sub>2</sub> H  | H   | H    | αMe  | βMe | OMe |                                             |                                                        |
| 565** | methyl 6,15-dihydroxycleroda-3,13-dien-16,15-olid-18-oate                  | CO <sub>2</sub> Me   | αMe                 | αOH | H    | αMe  | αMe | OH  | <i>Pulicaria wightiana</i>                  | <i>Helv. Chim. Acta.</i> , 2008, <b>91</b> , 2081-2088 |
| 566   | (-)-6β-hydroxy-5β,8β,9β,10α-cleroda-3,13-dien-16,15-olid-18-oic acid       | CO <sub>2</sub> H    | βMe                 | βOH | H    | βMe  | βMe | H   | <i>Duranta repens</i>                       | <i>Chem. Pharm. Bull.</i> , 2004, <b>52</b> , 785-789  |
| 567   | (+)-3,13-clerodadien-16,15-olid-18-oic acid                                | CO <sub>2</sub> H    | βMe                 | H   | H    | βMe  | βMe | H   |                                             |                                                        |
| 568   | (+)-7β-acetoxy-18-oxo-3,13-clerodadien-16,15-olide                         | CHO                  | βMe                 | H   | βOAc | βMe  | βMe | H   | <i>Sindora sumatrana</i>                    | <i>Chem. Pharm. Bull.</i> , 1994, <b>42</b> ,          |

|     |                                                                           |                   |            |             |             |            |            |    |                            |                                                     |
|-----|---------------------------------------------------------------------------|-------------------|------------|-------------|-------------|------------|------------|----|----------------------------|-----------------------------------------------------|
| 569 | (+)-7 $\beta$ -acetoxy-3,13-clerodadien-16,15-olid-18-oic acid            | CO <sub>2</sub> H | $\beta$ Me | H           | $\beta$ OAc | $\beta$ Me | $\beta$ Me | H  |                            | 1202-1207                                           |
| 570 | (+)-7 $\beta$ -acetoxy-16-hydroxy-3,13-clerodadien-16,15-olid-18-oic acid | CO <sub>2</sub> H | $\beta$ Me | H           | $\beta$ OAc | $\beta$ Me | $\beta$ Me | OH |                            |                                                     |
| 571 | scapanialide A                                                            | —                 | —          | —           | —           | —          | —          | —  | <i>Scapania parva</i>      | <i>Phytochem. Lett.</i> , 2012, <b>5</b> , 535–540  |
| 572 | scapanialide C                                                            | H                 | $\beta$ OH | $\beta$ Me  | OH          | —          | —          | —  |                            |                                                     |
| 573 | 2-oxo-5 $\alpha$ ,8 $\alpha$ -cleroda-3,13-dien-16,15-olide               | =O                | H          | $\alpha$ Me | H           | —          | —          | —  | <i>Vellozia bicolor</i>    | <i>Phytochemistry</i> , 1994, <b>37</b> , 1115-1117 |
| 574 | scutebata A                                                               | —                 | —          | —           | —           | —          | —          | —  | <i>Scutellaria barbata</i> | <i>J. Nat. Prod.</i> , 2010, <b>73</b> , 233-236    |
| 575 | trinerolactone                                                            | —                 | —          | —           | —           | —          | —          | —  | <i>Baccharis trinervis</i> | <i>Phytochemistry</i> , 1993, <b>34</b> , 1377-1384 |

\* Compound's name indicates 10 $\alpha$  H; however, compound's structure was presented as an *ent*-clerodane with a 10 $\beta$  H in *Phytochem. Lett.*, 2014, **8**, 10-15.

\*\* C-10 H should be  $\beta$

### 3.2.2. Type III Subtype IIb with Double Bonds in Other Positions (Tables 17 & 18)

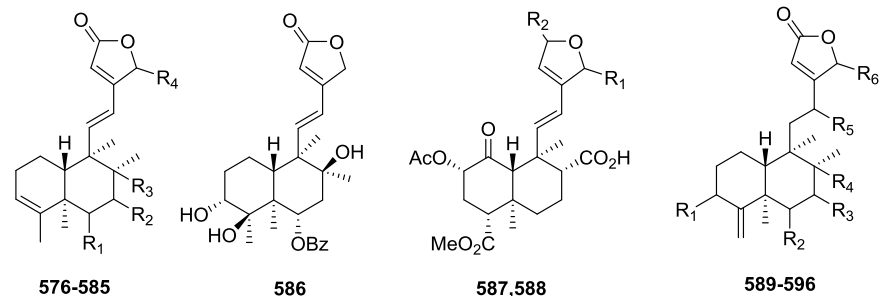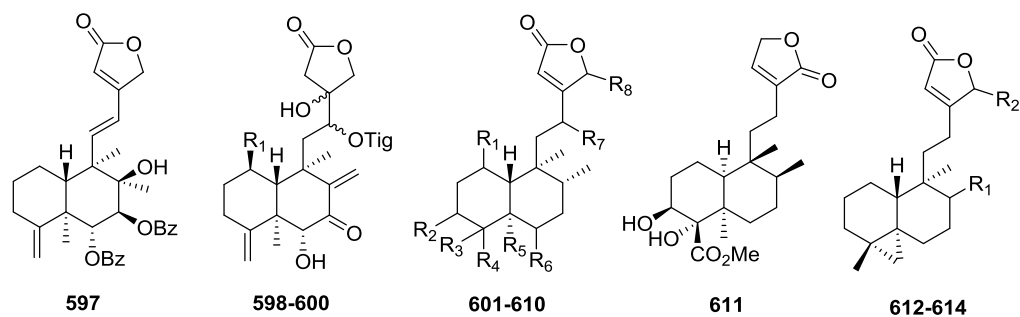

| No. | Compound Name                                                      | R <sub>1</sub>          | R <sub>2</sub> | R <sub>3</sub> | R <sub>4</sub> | R <sub>5</sub> | R <sub>6</sub> | Source                      | Ref.                                                                                                                                                                                                                                                                                                                                              |
|-----|--------------------------------------------------------------------|-------------------------|----------------|----------------|----------------|----------------|----------------|-----------------------------|---------------------------------------------------------------------------------------------------------------------------------------------------------------------------------------------------------------------------------------------------------------------------------------------------------------------------------------------------|
| 576 | 16 $\zeta$ -hydroxycycloroda-3,11( <i>E</i> ),13-trien-15,16-olide | H                       | H              | H              | OH             | –              | –              | <i>Callicarpa americana</i> | <i>J. Nat. Prod.</i> , 2007, <b>70</b> , 372-377                                                                                                                                                                                                                                                                                                  |
| 577 | barbatin C                                                         | $\alpha$ OH             | $\beta$ OH     | $\beta$ OH     | H              |                |                | <i>Scutellaria barbata</i>  | <i>J. Integr. Plant Biol.</i> , 2008, <b>50</b> , 699-702,<br><i>Fitoterapia</i> , 2010, <b>81</b> , 737-741,<br><i>Planta Med.</i> , 2011, <b>77</b> , 1536-1541,<br><i>Phytochemistry</i> , 2006, <b>67</b> , 1326-1330,<br><i>Planta Med.</i> , 2007, <b>73</b> , 1217-1220,<br><i>J. Asian Nat. Prod. Res.</i> , 2010, <b>12</b> ,<br>859-864 |
| 578 | barbatin D                                                         | $\alpha$ OBz            | $\beta$ OBz    | $\beta$ OH     | H              | –              | –              |                             |                                                                                                                                                                                                                                                                                                                                                   |
| 579 | barbatin E                                                         | Y <sub>4</sub>          | M <sub>1</sub> | $\beta$ OH     | H              | –              | –              |                             |                                                                                                                                                                                                                                                                                                                                                   |
| 580 | scutebata I                                                        | $\alpha$ OAc            | $\beta$ OH     | $\beta$ OH     | H              | –              | –              |                             |                                                                                                                                                                                                                                                                                                                                                   |
| 581 | scutebata J                                                        | $\alpha$ OBz            | $\beta$ OH     | $\beta$ OH     | H              | –              | –              |                             |                                                                                                                                                                                                                                                                                                                                                   |
| 582 | scutebata K                                                        | $\alpha$ Y <sub>9</sub> | $\beta$ OH     | $\beta$ OH     | H              | –              | –              |                             |                                                                                                                                                                                                                                                                                                                                                   |
| 583 | 6,7-di- <i>O</i> -acetoxybarbatin A                                | $\alpha$ OAc            | $\beta$ OAc    | $\beta$ OH     | H              | –              | –              |                             |                                                                                                                                                                                                                                                                                                                                                   |
| 584 | 6-(2,3-epoxy-2-isopropyl- <i>n</i> -propoxy)barbatin C             | $\alpha$ M <sub>2</sub> | $\beta$ OH     | $\beta$ OH     | H              | –              | –              |                             |                                                                                                                                                                                                                                                                                                                                                   |
| 585 | 6-acetoxybarbatin C                                                | $\alpha$ OAc            | $\beta$ OH     | $\beta$ OH     | H              | –              | –              |                             |                                                                                                                                                                                                                                                                                                                                                   |



|     |                                                                              |                |              |             |            |            |                             |                                                  |                                                       |
|-----|------------------------------------------------------------------------------|----------------|--------------|-------------|------------|------------|-----------------------------|--------------------------------------------------|-------------------------------------------------------|
| 586 | scuterivulactone D                                                           | H              | –            | –           | –          |            |                             | <i>Scutellaria rivularis</i>                     | <i>Chem. Pharm. Bull.</i> , 1997, <b>45</b> , 152-160 |
| 587 | salvidivin C                                                                 | OH             | =O           | –           | –          |            |                             | <i>Salvia divinorum</i>                          | <i>J. Nat. Prod.</i> , 2006, <b>69</b> , 1782-1786    |
| 588 | salvidivin D                                                                 | =O             | OH           | –           | –          |            |                             |                                                  |                                                       |
| 589 | (-)-3 $\alpha$ ,16 $\alpha$ -dihydroxycleroda-4(18),13(14)Z-dien-15,16-olide | $\alpha$ OH    | H            | H           | H          | H          | $\alpha$ OH                 | <i>Polyalthia longifolia</i>                     | <i>Nat. Prod. Res.</i> , 2010, <b>24</b> , 1687-1694  |
| 590 | 3 $\beta$ ,16 $\alpha$ -dihydroxycleroda-4(18),13(14)Z-dien-15,16-olide      | $\beta$ OH     | H            | H           | H          | H          | $\alpha$ OH                 | <i>Polyalthia barnesii</i>                       | <i>Phytochemistry</i> 1994, <b>37</b> , 1659-1662     |
| 591 | cleroda-4(18),13-dien-16,15-olide*                                           | H              | H            | H           | H          | H          | H                           | <i>Polyalthia longifolia</i>                     | <i>Phytochemistry</i> 1995, <b>38</b> , 189-194.      |
| 592 | 16-hydroxycleroda-4(18),13-dien-16,15-olide*                                 | H              | H            | H           | H          | H          | OH<br>( $\alpha/\beta$ 1:1) |                                                  |                                                       |
| 593 | —                                                                            | H              | H            | H           | H          | H          | $\beta$ OH                  |                                                  |                                                       |
| 594 | 16(R&S)-methoxycleroda-4(18),13-dien-15,16-olide                             | H              | H            | H           | H          | H          | OMe                         | <i>Polyalthia longifolia</i> var. <i>pendula</i> | <i>Molecules</i> , 2014, <b>19</b> , 2049-2060        |
| 595 | 3 $\alpha$ ,12(S)-dihydroxy-cleroda-4(18),13-dien-15,16-olide                | $\beta$ OH     | H            | H           | H          | $\beta$ OH | H                           | <i>Callicarpa americana</i>                      | <i>J. Nat. Prod.</i> , 2007, <b>70</b> , 372-377      |
| 596 | Scutebaicalin                                                                | H              | $\alpha$ OBz | $\beta$ OBz | $\beta$ OH | H          | H                           | <i>Scutellaria baicalensis</i>                   | <i>Phytochemistry</i> , 1996, <b>43</b> , 835-837     |
| 597 | scutebata L                                                                  | –              | –            | –           | –          | –          | –                           | <i>Scutellaria barbata</i>                       | <i>Planta Med.</i> , 2011, <b>77</b> , 1536-1541      |
| 598 | calcicolin A                                                                 | OiBu           | –            | –           | –          | –          | –                           | <i>Glossocarya calcicola</i>                     | <i>Phytochemistry</i> , 2005, <b>66</b> , 2844-2850   |
| 599 | calcicolin B                                                                 | OTig           | –            | –           | –          | –          | –                           |                                                  |                                                       |
| 600 | calcicolin C                                                                 | Y <sub>1</sub> | –            | –           | –          | –          | –                           |                                                  |                                                       |

\*Compounds' names (16,15-olide) and structures (15,16-olide) are shown as given in *Phytochemistry* 1995, **38**, 189-194.

**Table 18. Type III Subtype IIb continued**

| No. | Compound Name                                                                                                           | R <sub>1</sub> | R <sub>2</sub> | R <sub>3</sub>                         | R <sub>4</sub> | R <sub>5</sub>       | R <sub>6</sub> | R <sub>7</sub> | R <sub>8</sub> | Source                 | Ref.                                               |
|-----|-------------------------------------------------------------------------------------------------------------------------|----------------|----------------|----------------------------------------|----------------|----------------------|----------------|----------------|----------------|------------------------|----------------------------------------------------|
| 601 | (12S)-6 $\alpha$ ,18,19-triacetoxy-4 $\alpha$ ,12-dihydroxy-1 $\beta$ -tigloyloxy- <i>neo</i> -clerod-13-en-15,16-olide | $\beta$ OTig   | H              | $\beta$ CH <sub>2</sub> OAc            | $\alpha$ OH    | CH <sub>2</sub> OAc  | $\beta$ OAc    | $\beta$ OH     | H              | <i>Ajuga ciliata</i>   | <i>Fitoterapia</i> , 2011, <b>82</b> , 1123-1127   |
| 602 | ajugaciliatin I                                                                                                         | H              | H              | $\beta$ CH <sub>2</sub> OAc            | $\alpha$ OH    | CH <sub>2</sub> OTig | $\beta$ OH     | H              | H              |                        | <i>J. Nat. Prod.</i> , 2011, <b>74</b> , 1575–1583 |
| 603 | ajugaciliatin J                                                                                                         | H              | H              | $\beta$ CH <sub>2</sub> OTig           | $\alpha$ OH    | CH <sub>2</sub> OH   | $\beta$ OH     | H              | H              |                        |                                                    |
| 604 | (12S)-18,19-diacetoxy-4 $\alpha$ ,6 $\alpha$ ,12-trihydroxy-1 $\beta$ -tigloyloxy- <i>neo</i> -clerod-13-en-15,16-olide | $\beta$ OTig   | H              | $\beta$ CH <sub>2</sub> OAc            | $\alpha$ OH    | CH <sub>2</sub> OAc  | $\beta$ OH     | $\beta$ OH     | H              | <i>Ajuga decumbens</i> | <i>Planta Med.</i> , 2012, <b>78</b> , 1579-1583   |
| 605 | 4 $\alpha$ ,6 $\alpha$ -dihydroxy-18-(4'-methoxy-4'-oxobutyryloxy)-19-tigloyloxy- <i>neo</i> -clerod-13-en-15,16-olide  | H              | H              | $\beta$ CH <sub>2</sub> X <sub>7</sub> | $\alpha$ OH    | CH <sub>2</sub> OTig | $\beta$ OH     | $\beta$ H      | H              |                        |                                                    |

|     |                                                                                                                                                                             |             |    |                             |                             |                      |             |             |             |                                                  |                                                         |
|-----|-----------------------------------------------------------------------------------------------------------------------------------------------------------------------------|-------------|----|-----------------------------|-----------------------------|----------------------|-------------|-------------|-------------|--------------------------------------------------|---------------------------------------------------------|
| 606 | 6 $\alpha$ ,18-diacetoxy-4 $\alpha$ -hydroxy-19-tigloyloxy- <i>neo</i> -clerod-13-en-15,16-olide                                                                            | H           | H  | $\beta$ CH <sub>2</sub> OAc | $\alpha$ OH                 | CH <sub>2</sub> OTig | $\beta$ OAc | H           | H           | <i>Ajuga ciliate</i>                             | <i>Phytochem. Lett.</i> , 2012, <b>5</b> , 563-566      |
| 607 | ajugalide D                                                                                                                                                                 | H           | H  | H                           | $\alpha$ CO <sub>2</sub> Me | Me                   | $\alpha$ OH | $\alpha$ OH | H           | <i>Ajuga taiwanensis</i>                         | <i>Chem. Pharm. Bull.</i> , 2005, <b>53</b> , 164-167   |
| 608 | ajugacumbin F                                                                                                                                                               | H           | H  | $\beta$ CH <sub>2</sub> OH  | $\alpha$ OH                 | CH <sub>2</sub> OTig | $\alpha$ OH | H           | H           | <i>Ajuga decumbens</i>                           | <i>Chem. Pharm. Bull.</i> , 1990, <b>38</b> , 3167-3168 |
| 609 | 4 $\beta$ ,16 $\alpha$ -dihydroxy-cleroda-13(14) <i>Z</i> -en-15,16-olide                                                                                                   | H           | H  | $\beta$ OH                  | $\alpha$ Me                 | Me                   | H           | H           | $\alpha$ OH | <i>Polyalthia barnesii</i>                       | <i>Phytochemistry</i> 1994, <b>37</b> , 1659-1662       |
| 610 | 16-hydroxycleroda-13-ene-15,16-olide-3-one                                                                                                                                  | H           | =O | H                           | $\alpha$ Me                 | Me                   | H           | H           | OH          | <i>Polyalthia longifolia</i> var. <i>pendula</i> | <i>Planta Med.</i> , 2006, <b>72</b> , 1344-1347        |
| 611 | methyl(1 $\alpha$ ,4 $\alpha$ ,5 $\alpha$ ,6 $\beta$ ,8 $\alpha$ )-5-[2-(3-furan-3-ene-2-one)ethyl]-1,2,3,4,4a,5,6,7,8,8a-decahydro-1,2-dihydroxy-1-naphthalene carboxylate | -           | -  | -                           | -                           | -                    | -           | -           | -           | <i>Tinospora rumphii</i>                         | <i>J. Nat. Prod.</i> , 2000, <b>63</b> , 509-511        |
| 612 | dytesinin A                                                                                                                                                                 | $\alpha$ Me | OH | -                           | -                           | -                    | -           | -           | -           | <i>Cystodytes</i> sp                             | <i>Tetrahedron</i> 2000, <b>56</b> , 7923-7926          |
| 613 | dytesinin B                                                                                                                                                                 | $\alpha$ Me | H  | -                           | -                           | -                    | -           | -           | -           |                                                  |                                                         |
| 614 | echinoclerodane A                                                                                                                                                           | $\beta$ Me  | OH | -                           | -                           | -                    | -           | -           | -           | <i>Echinomuricea</i> sp                          | <i>Molecules</i> , 2012, <b>17</b> , 9443-9450          |

#### 4. Type IV with a 5-(3-Furyl)- $\delta$ -valerolactone-based Side Chain at C-9

##### 4.1. Type IV Subtype I with *O*-Containing Rings (Table 19)

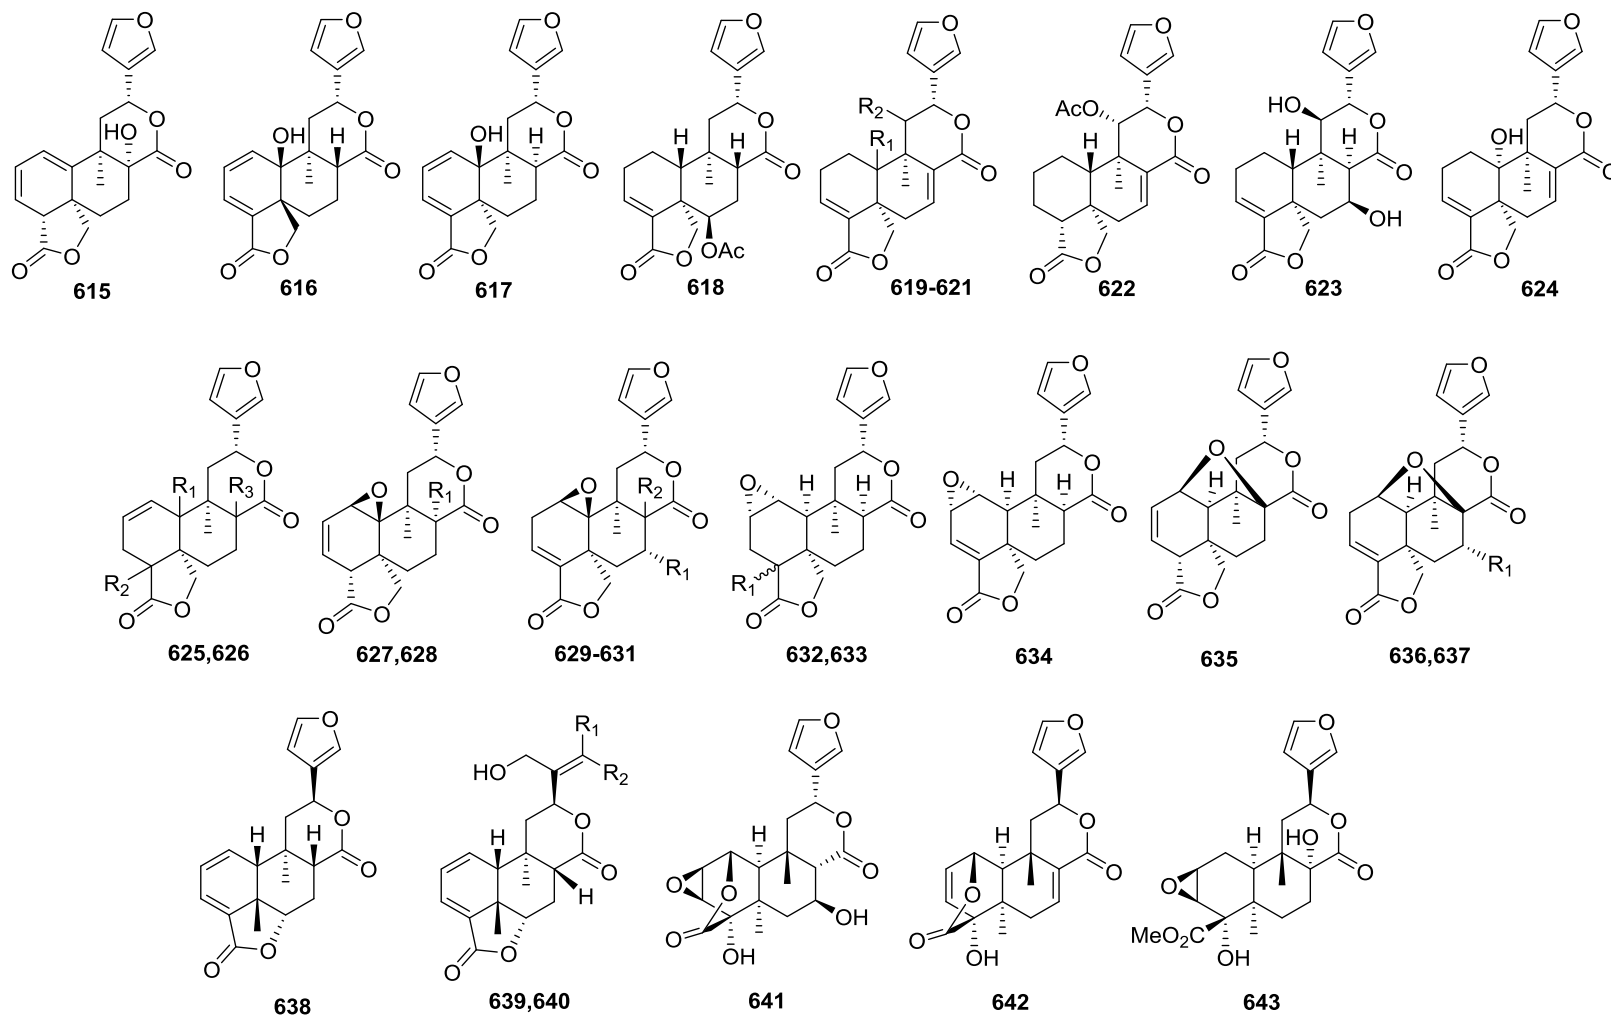

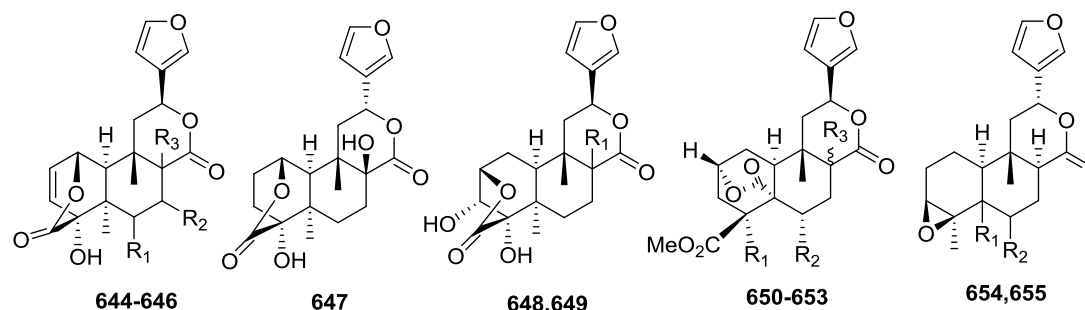

| No. | Compound Name                                                                                                                      | R <sub>1</sub> | R <sub>2</sub> | R <sub>3</sub> | Source                    | Ref.                                                    |
|-----|------------------------------------------------------------------------------------------------------------------------------------|----------------|----------------|----------------|---------------------------|---------------------------------------------------------|
| 615 | tehuanin D                                                                                                                         | —              | —              | —              | <i>Salvia herbacea</i>    | <i>J. Nat. Prod.</i> , 2012, <b>75</b> , 951-958        |
| 616 | salvimicrophyllin C                                                                                                                | —              | —              | —              | <i>Salvia microphylla</i> | <i>J. Nat. Prod.</i> , 2014, <b>77</b> , 1088-1092      |
| 617 | salvimicrophyllin D                                                                                                                | —              | —              | —              |                           |                                                         |
| 618 | dugesin E                                                                                                                          | —              | —              | —              | <i>Salvia dugesii</i>     | <i>Nat. Prod. Bioprospect.</i> , 2011, <b>1</b> , 81-86 |
| 619 | <i>ent</i> -(5 <i>R</i> ,9 <i>R</i> )-15,16-epoxy-10 <i>S</i> -hydroxy-cleroda-3,13(16),14-triene-17,12 <i>S</i> ;18,19-diolide    | αOH            | H              | —              | <i>Salvia haenkei</i>     | <i>Tetrahedron</i> , 1997, <b>53</b> , 14719-14728      |
| 620 | —                                                                                                                                  | βH             | αOH            | —              | <i>Salvia miniata</i>     | <i>Phytochemistry</i> , 2011, <b>72</b> , 265-275       |
| 621 | —                                                                                                                                  | βOH            | H              | —              |                           |                                                         |
| 622 | —                                                                                                                                  | —              | —              | —              |                           |                                                         |
| 623 | —                                                                                                                                  | —              | —              | —              |                           |                                                         |
| 624 | <i>ent</i> -(5 <i>R</i> ,9 <i>R</i> )-15,16-epoxy-10 <i>S</i> -hydroxycleroda-3,7,13(16),14-tetraene-17,12 <i>S</i> ,18,19-diolide | —              | —              | —              | <i>Salvia haenkei</i>     | <i>Tetrahedron</i> , 1997, <b>53</b> , 14719-14728      |
| 625 | <i>ent</i> -(4 <i>S</i> ,5 <i>R</i> ,9 <i>S</i> ,10 <i>R</i> )-15,16-epoxycleroda-1,13(16),14-trien-17,12 <i>S</i> ;18,19-diolide  | αH             | αH             | αH             |                           |                                                         |
| 626 | infuscatin                                                                                                                         | βOH            | βOH            | αOH            | <i>Salvia infuscata</i>   | <i>Phytochem. Anal.</i> , 1994, <b>5</b> , 302-304      |
| 627 | tehuanin E                                                                                                                         | OH             | —              | —              | <i>Salvia herbacea</i>    | <i>J. Nat. Prod.</i> , 2012, <b>75</b> , 951-958        |
| 628 | 1β,10β-epoxysalviarin                                                                                                              | H              | —              | —              |                           |                                                         |
| 629 | tehuanin F                                                                                                                         | OH             | βH             | —              |                           |                                                         |
| 630 | tehuanin G                                                                                                                         | H              | αOH            | —              |                           |                                                         |
| 631 | tehuanin H                                                                                                                         | H              | H              | —              |                           |                                                         |
| 632 | 1α,2α-epoxy-3,4α-dihydrolinearolactone                                                                                             | αH             | —              | —              | <i>Salvia reptans</i>     | <i>Phytochemistry</i> , 1991, <b>30</b> , 2335-2338     |
| 633 | polystachyne D                                                                                                                     | βH             | —              | —              | <i>Salvia polystachya</i> | <i>Phytochemistry</i> , 2000, <b>53</b> , 103-109       |
| 634 | polystachyne E                                                                                                                     | —              | —              | —              |                           |                                                         |
| 635 | tehuanin A                                                                                                                         | —              | —              | —              | <i>Salvia herbacea</i>    | <i>J. Nat. Prod.</i> , 2012, <b>75</b> , 951-958        |

|     |                                                                             |                   |                   |            |                                |                                                         |
|-----|-----------------------------------------------------------------------------|-------------------|-------------------|------------|--------------------------------|---------------------------------------------------------|
| 636 | tehuanin B                                                                  | H                 | —                 | —          |                                |                                                         |
| 637 | tehuanin C                                                                  | OH                | —                 | —          |                                |                                                         |
| 638 | 15,16-epoxy,1,3,13(16),14-clerodatetraene-17,12:18,6-diolide                | —                 | —                 | —          |                                |                                                         |
| 639 | 15-carboxy-8 $\beta$ ,16-dihydroxy-1,3,13E-clerodatriene-17,12:18,6-diolide | CO <sub>2</sub> H | H                 | —          | <i>Jamesoniella autumnalis</i> | <i>Phytochemistry</i> , 1998, <b>48</b> , 681-685       |
| 640 | 15-carboxy-8 $\beta$ ,16-dihydroxy-1,3,13Z-clerodatriene-17,12:18,6-diolide | H                 | CO <sub>2</sub> H | —          |                                |                                                         |
| 641 | fibrauretin A                                                               | —                 | —                 | —          | <i>Fibraurea tinctoria</i>     | <i>J. Nat. Prod.</i> , 2007, <b>70</b> , 1930-1933      |
| 642 | tinospin E                                                                  | —                 | —                 | —          |                                | <i>Chem. Pharm. Bull.</i> , 2012, <b>60</b> , 1324-1328 |
| 643 | tinosporin A                                                                | —                 | —                 | —          | <i>Tinospora sagittata</i>     | <i>Phytochem. Lett.</i> , 2015, <b>12</b> , 173-176     |
| 644 | tinosporin B                                                                | H                 | $\beta$ OH        | $\beta$ H  |                                |                                                         |
| 645 | 6-hydroxycolumbin                                                           | $\alpha$ OH       | H                 | $\beta$ H  | <i>Penianthus zenkeri</i>      | <i>Phytochemistry</i> , 1991, <b>30</b> , 1957-1962     |
| 646 | 6-hydroxyisocolumbin                                                        | $\alpha$ OH       | H                 | $\alpha$ H |                                |                                                         |
| 647 | epi-8-hydroxycolumbin                                                       | —                 | —                 | —          |                                |                                                         |
| 648 | fibrauretin B                                                               | $\alpha$ H        | —                 | —          | <i>Fibraurea tinctoria</i>     | <i>Bioorg. Med. Chem.</i> , 2008, <b>16</b> , 9603-9609 |
| 649 | fibrauretin C                                                               | $\beta$ OH        | —                 | —          |                                |                                                         |
| 650 | antadiosbulbin A                                                            | OH                | H                 | $\alpha$ H | <i>Dioscorea antaly</i>        | <i>Phytochemistry</i> , 2010, <b>71</b> , 1007-1013     |
| 651 | antadiosbulbin B                                                            | OH                | H                 | $\beta$ H  |                                |                                                         |
| 652 | bafoudiosbulbin F                                                           | H                 | H                 | $\beta$ OH | <i>Dioscorea bulbifera</i>     | <i>Phytochemistry</i> , 2008, <b>69</b> , 2374-2379     |
| 653 | bafoudiosbulbin G                                                           | H                 | $\alpha$ OAc      | $\beta$ OH |                                |                                                         |
| 654 | 3,4,15,16-diepoxy-cleroda-13(16),14-diene-12,17-olide                       | $\beta$ Me        | H                 | —          | <i>Croton oblongifolius</i>    | <i>Phytochem. Lett.</i> , 2011, <b>4</b> , 147-150      |
| 655 | ravidin A                                                                   | $\alpha$ Me       | =O                | —          | <i>Nannoglottis ravida</i>     | <i>Phytochemistry</i> , 2004, <b>65</b> , 2533-2537     |

#### 4.2. Type IV Subtype II Other Compounds (Table 20)

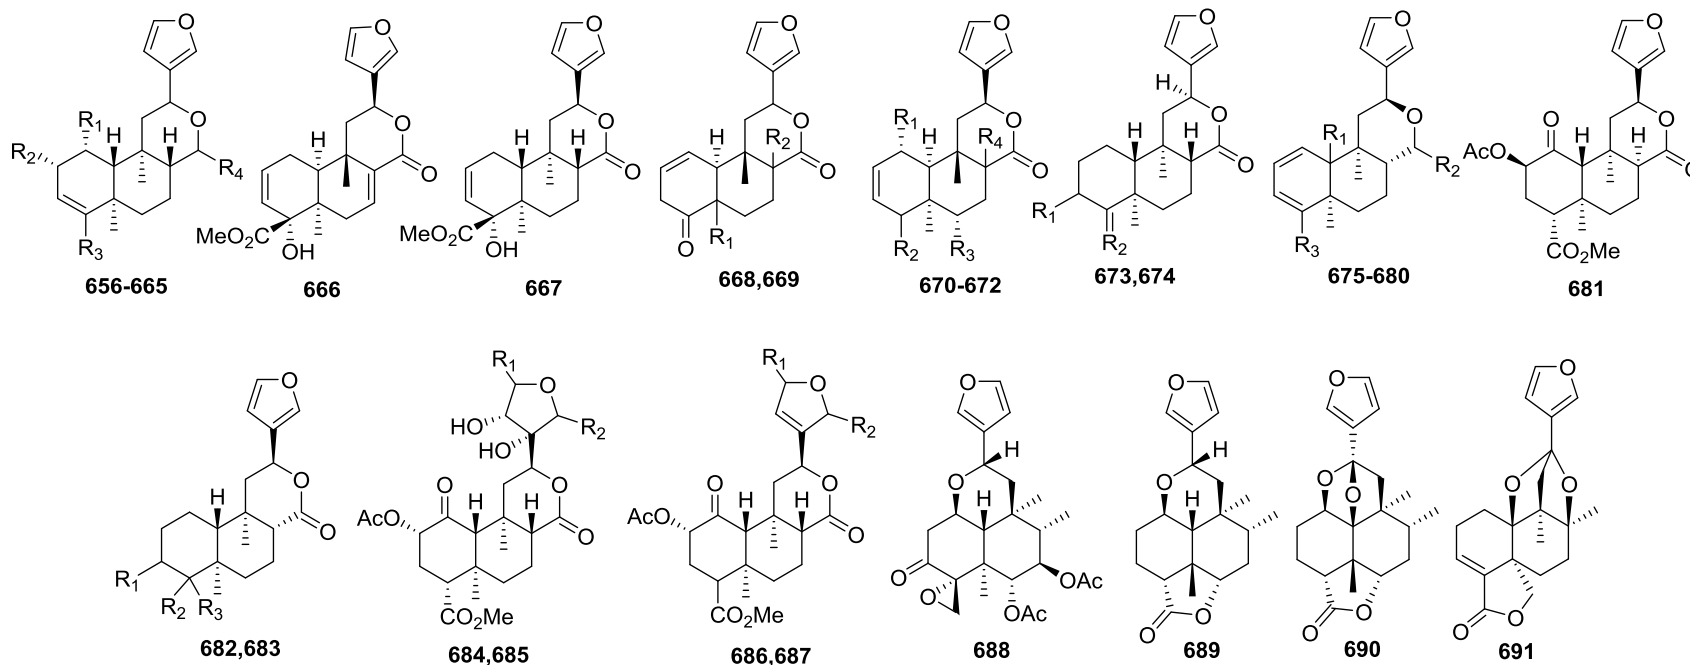

| No. | Compound Name                      | R <sub>1</sub> | R <sub>2</sub> | R <sub>3</sub>     | R <sub>4</sub> | Source                       | Ref.                                                                 |
|-----|------------------------------------|----------------|----------------|--------------------|----------------|------------------------------|----------------------------------------------------------------------|
| 656 | microdon A                         | H              | =O             | Me                 | =O             | <i>Gomphostemma microdon</i> | <i>Z. Naturforsch., B: J. Chem. Sci.</i> , 2009, <b>64</b> , 443-446 |
| 657 | 12-epi-methyl-barbascoate          | H              | H              | CO <sub>2</sub> Me | =O             | <i>Croton ururucana</i>      | <i>Phytochemistry</i> , 1998, <b>49</b> , 171-174                    |
| 658 | 17-oxo-1,2-dihydrowelwitschic acid | H              | H              | CO <sub>2</sub> H  | =O             | <i>Conyza welwitschii</i>    | <i>Phytochemistry</i> , 1990, <b>29</b> , 2247-2252                  |
| 659 | salvinorin C                       | OAc            | OAc            | CO <sub>2</sub> Me | =O             | <i>Salvia divinorum</i>      | <i>Org. Lett.</i> , 2001, <b>3</b> , 3935-3937                       |
| 660 | salvinorin D                       | OAc            | OH             | CO <sub>2</sub> Me | =O             |                              | <i>J. Nat. Prod.</i> , 2003, <b>66</b> , 703-705                     |
| 661 | salvinorin E                       | OH             | OAc            | CO <sub>2</sub> Me | =O             |                              |                                                                      |
| 662 | salvinorin F                       | OH             | H              | CO <sub>2</sub> Me | =O             |                              |                                                                      |
| 663 | salvinorin H                       | OH             | OH             | CO <sub>2</sub> Me | =O             |                              |                                                                      |
| 664 | salvinorin I                       | OH             | OH             | CO <sub>2</sub> Me | βOH            |                              |                                                                      |
| 665 | salvinorin J                       | OH             | OAc            | CO <sub>2</sub> Me | α,β-OH         |                              |                                                                      |
| 666 | penianthic acid methyl ester       | —              | —              | —                  | —              | <i>Penianthus zenkeri</i>    | <i>Phytochemistry</i> , 1991, <b>30</b> , 1957-1962                  |
| 667 | 8-epicordatin                      | —              | —              | —                  | —              | <i>Croton palanostigma</i>   | <i>J. Braz. Chem. Soc.</i> , 2010, <b>21</b> , 731-739               |
| 668 | tinocallone A                      | βMe            | βH             | —                  | —              | <i>Tinospora capillipes</i>  | <i>Chin. Chem. Lett.</i> , 1992, <b>3</b> , 185-188                  |
| 669 | tinocallone B                      | αMe            | αH             | —                  | —              |                              |                                                                      |

|     |                                                                                           |              |                 |                    |            |                                   |                                                               |
|-----|-------------------------------------------------------------------------------------------|--------------|-----------------|--------------------|------------|-----------------------------------|---------------------------------------------------------------|
| 670 | tinocallone C                                                                             | H            | =O              | H                  | $\beta$ H  |                                   |                                                               |
| 671 | tinocallone D                                                                             | H            | =O              | H                  | $\alpha$ H |                                   |                                                               |
| 672 | tincordin                                                                                 | OH           | =O              | OH                 | $\beta$ H  | <i>Tinospora cordifolia</i>       | <i>Nat. Prod. Res.</i> , 2013, <b>27</b> , 1431-1436          |
| 673 | crotonolide E                                                                             | =O           | $\alpha$ Me     | —                  | —          | <i>Croton laui</i>                | <i>J. Nat. Prod.</i> , 2014, <b>77</b> , 1013-1020            |
| 674 | crotonolide F                                                                             | $\alpha$ OH  | CH <sub>2</sub> | —                  | —          |                                   |                                                               |
| 675 | —                                                                                         | $\alpha$ H   | =O              | CO <sub>2</sub> Me | —          | <i>Croton jimenezii</i>           | <i>Ingenieria Y Ciencia Quimica</i> , 2000, <b>19</b> , 68-73 |
| 676 | —                                                                                         | $\beta$ H    | =O              | CO <sub>2</sub> Me | —          |                                   |                                                               |
| 677 | 17-oxo-10-epi-welwitschic acid                                                            | $\alpha$ H   | =O              | CO <sub>2</sub> H  | —          | <i>Conyza welwitschii</i>         | <i>Phytochemistry</i> , 1990, <b>29</b> , 2247-2252           |
| 678 | 17-oxo-welwitschic acid                                                                   | $\beta$ H    | =O              | CO <sub>2</sub> H  | —          |                                   |                                                               |
| 679 | 17 $\alpha$ -hydroxywelwitschic acid                                                      | $\beta$ H    | $\alpha$ OH     | CO <sub>2</sub> H  | —          |                                   |                                                               |
| 680 | 17 $\beta$ -hydroxywelwitschic acid                                                       | $\beta$ H    | $\beta$ OH      | CO <sub>2</sub> H  | —          |                                   |                                                               |
| 681 | 2-epi-8-epi-salvinorin A                                                                  | —            | —               | —                  | —          | the smoke of salvinorin A         | <i>Tetrahedron Lett.</i> , 2010, <b>51</b> , 5207-5209        |
| 682 | methyl 3-oxo-12-epibarbascoate                                                            | =O           | H               | CO <sub>2</sub> Me | —          | <i>Croton urucurana</i>           | <i>J. Braz. Chem. Soc.</i> , 2013, <b>24</b> , 609-614.       |
| 683 | furocrotinsulolide A                                                                      | $\alpha$ OH  | $\beta$ OH      | $\alpha$ Me        | —          | <i>Croton insularis</i>           | <i>Helv. Chim. Acta.</i> , 2005, <b>88</b> , 2654-2660        |
| 684 | salvinicin A                                                                              | $\beta$ OMe  | $\beta$ OMe     | —                  | —          | <i>Salvia divinorum</i>           | <i>Org. Lett.</i> , 2005, <b>7</b> , 3017-3020                |
| 685 | salvinicin B                                                                              | $\alpha$ OMe | $\alpha$ OMe    | —                  | —          |                                   |                                                               |
| 686 | salvidivin A                                                                              | =O           | OH              | —                  | —          |                                   | <i>J. Nat. Prod.</i> , 2006, <b>69</b> , 1782-1786            |
| 687 | salvidivin B                                                                              | OH           | =O              | —                  | —          |                                   |                                                               |
| 688 | cornutin A                                                                                | —            | —               | —                  | —          | <i>Cornutia grandifolia</i>       | <i>J. Org. Chem.</i> , 1992, <b>57</b> , 862-866              |
| 689 | 1 $\beta$ ,12:15,16-diepoxy-cis-ent-cleroda-13(16),14-dien-18 $\alpha$ ,6 $\alpha$ -olide | —            | —               | —                  | —          | <i>Adelanthus lindenbergianus</i> | <i>Phytochemistry</i> , 2004, <b>65</b> , 127-137             |
| 690 | orcadensin                                                                                | —            | —               | —                  | —          |                                   |                                                               |
| 691 | salvianduline D                                                                           | —            | —               | —                  | —          | <i>Salvia miniata</i>             | <i>Phytochemistry</i> , 2011, <b>72</b> , 265-275             |

## 5. Type V with an $\alpha$ -Spiro-attached 4-(3-Furyl)- $\gamma$ -butyrolactone-based Side Chain at C-9

### 5.1. Type V Subtype I with Various O-Containing Rings (Table 21)

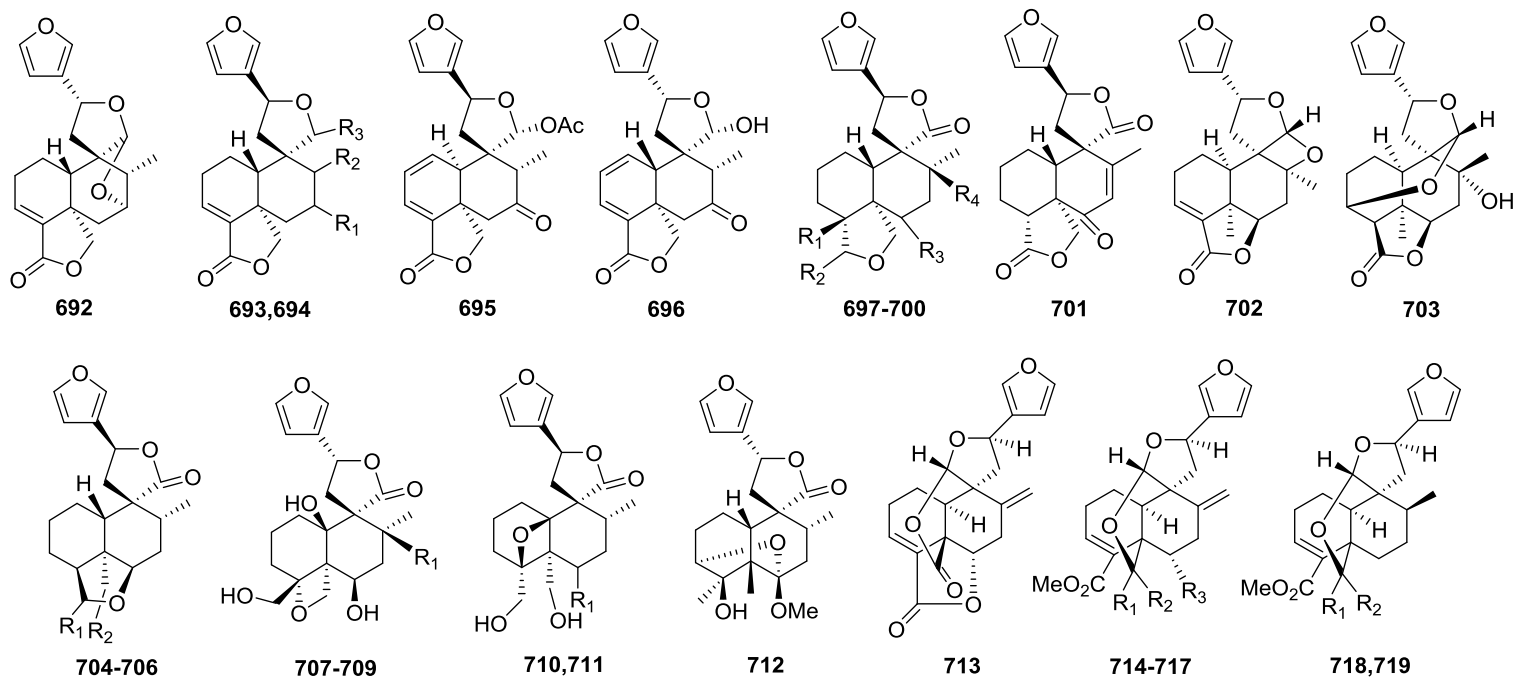

| No. | Compound Name                         | R <sub>1</sub> | R <sub>2</sub> | R <sub>3</sub> | R <sub>4</sub> | Source                    | Ref.                                                    |
|-----|---------------------------------------|----------------|----------------|----------------|----------------|---------------------------|---------------------------------------------------------|
| 692 | <i>trans</i> -1,2-dihydrosalvifaricin | —              | —              | —              | —              | <i>Salvia fulgens</i>     | <i>J. Nat. Med.</i> , 2006, <b>60</b> , 58-63           |
| 693 | —                                     | =O             | $\beta$ Me     | $\alpha$ OAc   | —              | <i>Salvia miniata</i>     | <i>Phytochemistry</i> , 2011, <b>72</b> , 265-275       |
| 694 | —                                     | $\alpha$ OH    | $\alpha$ Me    | $\beta$ OAc    | —              |                           |                                                         |
| 695 | salvifolin                            | —              | —              | —              | —              | <i>Salvia tiliaefolia</i> | <i>J. Org. Chem.</i> , 1990, <b>55</b> , 3522-3525      |
| 696 | dugesin F                             | —              | —              | —              | —              | <i>Salvia dugesii</i>     | <i>Nat. Prod. Bioprospect.</i> , 2011, <b>1</b> , 81-86 |
| 697 | teupolin XII                          | H              | $\beta$ OMe    | $\beta$ OH     | H              | <i>Teucrium polium</i>    | <i>Phytochemistry</i> , 2011, <b>72</b> , 2037-2044     |
| 698 | teucvisin A                           | OH             | =O             | $\alpha$ OH    | H              | <i>Teucrium viscidum</i>  | <i>Chem. Pharm. Bull.</i> , 2014, <b>62</b> , 472-476   |
| 699 | teuperminB                            | H              | =O             | =O             | OH             | <i>Teucrium perny</i>     | <i>Phytochemistry</i> , 1991, <b>30</b> , 1963-1966     |
| 700 | teuperminC                            | H              | =O             | $\beta$ OH     | OH             |                           |                                                         |



|     |                                                                                                                                 |              |     |     |   |                             |                                                       |
|-----|---------------------------------------------------------------------------------------------------------------------------------|--------------|-----|-----|---|-----------------------------|-------------------------------------------------------|
| 701 | teupernin A                                                                                                                     | —            | —   | —   | — |                             |                                                       |
| 702 | cephaloziellin A                                                                                                                | —            | —   | —   | — | <i>Cephaloziella kiaeri</i> | <i>J. Nat. Prod.</i> , 2013, <b>76</b> , 1700-1708    |
| 703 | cephaloziellin B                                                                                                                | —            | —   | —   | — |                             |                                                       |
| 704 | teupolin X                                                                                                                      | $\alpha$ OH  | OH  | —   | — | <i>Teucrium polium</i>      | <i>Phytochemistry</i> , 2011, <b>72</b> , 2037-2044.  |
| 705 | teupolin XI                                                                                                                     | $\alpha$ OMe | OH  | —   | — |                             |                                                       |
| 706 | teucvisin B                                                                                                                     | =O           | OAc | —   | — | <i>Teucrium viscidum</i>    | <i>Chem. Pharm. Bull.</i> , 2014, <b>62</b> , 472-476 |
| 707 | 12- <i>epi</i> -montanin D                                                                                                      | H            | —   | —   | — | <i>Teucrium maghrebinum</i> | <i>J. Nat. Prod.</i> , 2000, <b>63</b> , 1029-1031    |
| 708 | teusandrin C                                                                                                                    | OH           | —   | —   | — | <i>Teucrium sandrasicum</i> | <i>Phytochemistry</i> , 1997, <b>45</b> , 1653-1662   |
| 709 | teusandrin D                                                                                                                    | H            | —   | —   | — |                             |                                                       |
| 710 | teusandrin E                                                                                                                    | =O           | —   | —   | — |                             |                                                       |
| 711 | teusandrin F                                                                                                                    | $\alpha$ OH  | —   | —   | — |                             |                                                       |
| 712 | 4 $\beta$ -hydroxy-3 $\alpha$ ,6 $\alpha$ ,15,16-bis-epoxy-6 $\beta$ -methoxy- <i>cis</i> -clerodane-13(16),14-dien-20,12-olide | —            | —   | —   | — | <i>Pteronia eenii</i>       | <i>Phytochemistry</i> , 1990, <b>29</b> , 1231-1245   |
| 713 | crotonolide A                                                                                                                   | —            | —   | —   | — | <i>Croton laui</i>          | <i>J. Nat. Prod.</i> , 2014, <b>77</b> , 1013-1020    |
| 714 | crotonolide B                                                                                                                   | H            | OH  | H   | — |                             |                                                       |
| 715 | isocrotonolide B                                                                                                                | OH           | H   | H   | — |                             |                                                       |
| 716 | crotonolide C                                                                                                                   | H            | OH  | OAc | — |                             |                                                       |
| 717 | isocrotonolide C                                                                                                                | OH           | H   | OAc | — |                             |                                                       |
| 718 | crotonolide D                                                                                                                   | H            | OH  | —   | — |                             |                                                       |
| 719 | isocrotonolide D                                                                                                                | OH           | H   | —   | — |                             |                                                       |

## 5.2. Type V Subtype II with 4,18-; 3,4-; or 8,17-Oxirane Moieties (Table 22)

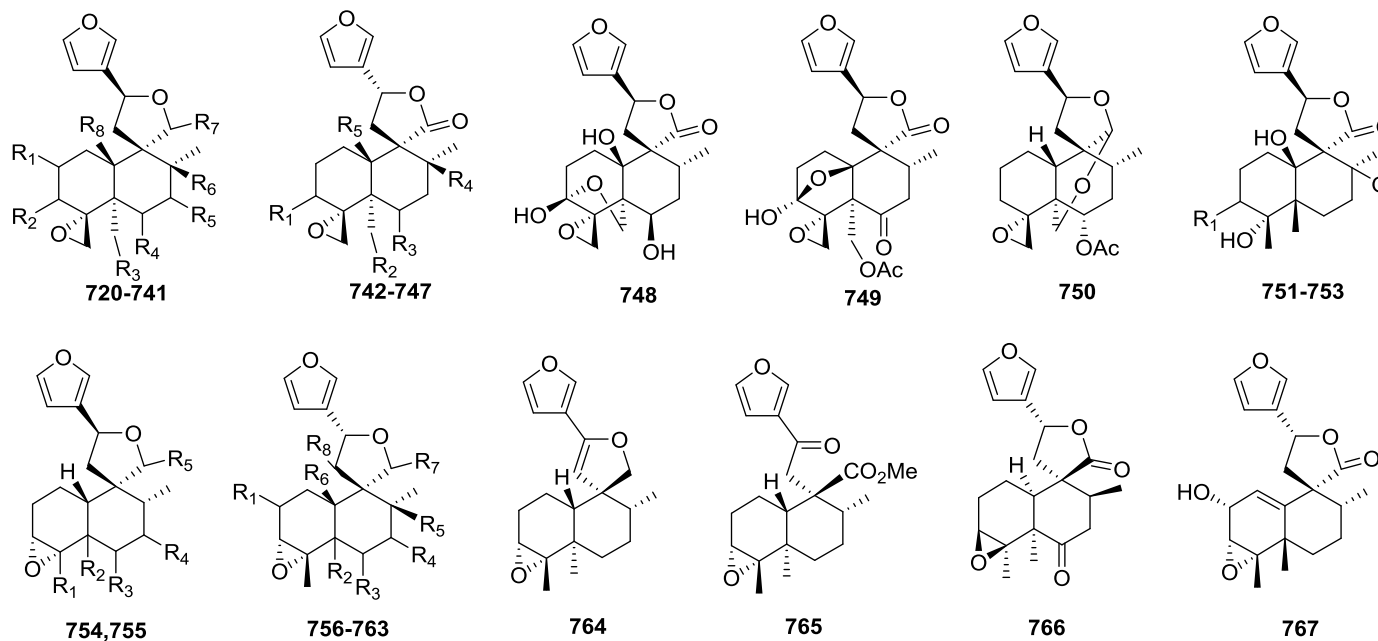

| No. | Compound Name                      | R <sub>1</sub> | R <sub>2</sub> | R <sub>3</sub> | R <sub>4</sub> | R <sub>5</sub> | R <sub>6</sub> | R <sub>7</sub> | R <sub>8</sub> | Source                      | Ref.                                                      |
|-----|------------------------------------|----------------|----------------|----------------|----------------|----------------|----------------|----------------|----------------|-----------------------------|-----------------------------------------------------------|
| 720 | teumassin                          | OH             | H              | OAc            | =O             | H              | H              | =O             | H              | <i>Teucrium massiliense</i> | <i>Phytochemistry</i> ,<br>1992, <b>31</b> ,<br>4366-4367 |
| 721 | 4 $\alpha$ ,18-epoxy-tafricanin A  | H              | =O             | OAc            | =O             | H              | H              | =O             | H              | <i>Teucrium pestalozzae</i> | <i>Phytochemistry</i> ,<br>1990, <b>29</b> ,<br>988-989   |
| 722 | 20-oxo-teuflavin                   | H              | =O             | OAc            | $\beta$ OH     | H              | H              | =O             | H              |                             |                                                           |
| 723 | teutridin                          | H              | =O             | OAc            | =O             | $\beta$ OH     | H              | =O             | H              | <i>Teucrium trifidum</i>    | <i>Phytochemistry</i> ,<br>1994, <b>36</b> ,<br>1549-1550 |
| 724 | 3- <i>O</i> -deacetylteugracilin A | H              | $\beta$ OH     | OAc            | $\beta$ OH     | H              | H              | =O             | H              | <i>Teucrium gracile</i>     | <i>Phytochemistry</i> ,<br>1991, <b>30</b> ,<br>3693-3697 |
| 725 | teugracilin A                      | H              | $\beta$ OAc    | OAc            | $\beta$ OH     | H              | H              | =O             | H              |                             |                                                           |
| 726 | teugracilin B                      | H              | $\beta$ OH     | OAc            | $\alpha$ OH    | H              | H              | =O             | H              |                             |                                                           |

|     |                                    |             |             |              |              |            |    |              |    |                             |                                                           |
|-----|------------------------------------|-------------|-------------|--------------|--------------|------------|----|--------------|----|-----------------------------|-----------------------------------------------------------|
| 727 | teusandrin A                       | H           | H           | OAc          | $\alpha$ OAc | H          | OH | =O           | OH | <i>Teucrium sandrasicum</i> | <i>Phytochemistry</i> ,<br>1997, <b>45</b> ,<br>1653-1662 |
| 728 | teusandrin B                       | H           | H           | OAc          | $\alpha$ OH  | H          | OH | =O           | OH |                             |                                                           |
| 729 | 3-deacetylteucropodine             | H           | $\beta$ OAc | OAc          | $\alpha$ OH  | H          | H  | =O           | H  | <i>Teucrium polium</i>      | <i>Phytochemistry</i> ,<br>1994, <b>37</b> ,<br>1663-1666 |
| 730 | 3,20-bis-diacetylteupyreinidine    | H           | $\beta$ OH  | OAc          | $\alpha$ OAc | H          | H  | $\alpha$ OH  | H  |                             |                                                           |
| 731 | 6,20-bis-deacetylteupyreinidine    | H           | $\beta$ OAc | OAc          | $\alpha$ OH  | H          | H  | $\alpha$ OH  | H  |                             |                                                           |
| 732 | 3,6,20-tri-deacetyl-teupyreinidine | H           | $\beta$ OH  | OAc          | $\alpha$ OH  | H          | H  | $\alpha$ OH  | H  | <i>Teucrium fruticans</i>   | <i>Phytochemistry</i> ,<br>2005, <b>66</b> ,<br>2298-2303 |
| 733 | 10-hydroxyteucjaponin B            | H           | H           | OAc          | $\beta$ OH   | H          | H  | =O           | OH |                             |                                                           |
| 734 | 6-acetyl-10-hydroxyteucjaponin B   | H           | H           | OAc          | $\beta$ OAc  | H          | H  | =O           | OH |                             |                                                           |
| 735 | 6-acetylteucjaponin B              | H           | H           | OAc          | $\beta$ OAc  | H          | H  | =O           | H  | <i>Teucrium nudicaule</i>   | <i>Nat. Prod. Res.</i> ,<br>1996, <b>8</b> ,<br>189-197   |
| 736 | 12- <i>epi</i> -teupyreinin        | H           | $\beta$ OAc | OAc          | $\alpha$ OAc | H          | H  | =O           | H  |                             |                                                           |
| 737 | teubutilin B                       | H           | H           | OAc          | $\alpha$ OAc | H          | H  | $\beta$ OAc  | H  | <i>Teucrium abutiloides</i> | <i>Phytochemistry</i> ,<br>1990, <b>29</b> ,<br>579-584   |
| 738 | teucrasiatin                       | H           | H           | OAc          | =O           | H          | H  | $\alpha$ OH  | H  | <i>Teucrium asiaticum</i>   | <i>Phytochemistry</i> ,<br>1996, <b>43</b> ,<br>435-438   |
| 739 | teugracilin D                      | H           | $\beta$ OH  | OAc          | $\alpha$ OH  | H          | H  | $\alpha$ OAc | H  | <i>Teucrium gracile</i>     | <i>Phytochemistry</i> ,<br>1992, <b>31</b> ,<br>3531-3534 |
| 740 | teucryemin                         | H           | $\beta$ OH  | OH           | $\beta$ OAc  | H          | H  | =O           | H  | <i>Teucrium yemense</i>     | <i>Phytochemistry</i> ,<br>1995, <b>40</b> ,<br>1737-1741 |
| 741 | 19- <i>O</i> -acetylteucryemin     | H           | $\beta$ OH  | OAc          | $\beta$ OAc  | H          | H  | =O           | H  |                             |                                                           |
| 742 | teucryeminone                      | $\beta$ OAc | OAc         | =O           | H            | $\beta$ H  | —  | —            | —  |                             |                                                           |
| 743 | 12- <i>epi</i> -teucjaponin A      | H           | OAc         | $\beta$ OH   | H            | $\beta$ H  | —  | —            | —  | <i>Teucrium maghrebinum</i> | <i>J. Nat. Prod.</i> ,<br>2000, <b>63</b> ,<br>1029-1031  |
| 744 | sandrasin A                        | H           | OAc         | $\alpha$ OAc | OH           | $\beta$ OH | —  | —            | —  | <i>Teucrium</i>             | <i>Phytochemistry</i> ,                                   |

|     |                                                                                                                                          |                            |             |                             |              |            |    |             |    |                                    |                                                                  |
|-----|------------------------------------------------------------------------------------------------------------------------------------------|----------------------------|-------------|-----------------------------|--------------|------------|----|-------------|----|------------------------------------|------------------------------------------------------------------|
| 745 | 6-deacetylsandrasin A                                                                                                                    | H                          | OAc         | $\alpha$ OH                 | OH           | $\beta$ OH | —  | —           | —  | <i>sandrasicum</i>                 | 1996, <b>42</b> ,<br>775-778                                     |
| 746 | teubrevin C                                                                                                                              | $\beta$ OAc                | OAc         | =O                          | H            | H          | —  | —           | —  | <i>Teucrium<br/>brevifolium</i>    | <i>Tetrahedron</i> ,<br>1995, <b>51</b> ,<br>837-848             |
| 747 | teubrevin D                                                                                                                              | $\beta$ OAc                | OAc         | =O                          | OH           | OH         | —  | —           | —  |                                    |                                                                  |
| 748 | teupestalin A                                                                                                                            | —                          | —           | —                           | —            | —          | —  | —           | —  | <i>Teucrium<br/>pestalozzae</i>    | <i>Phytochemistry</i> ,<br>1990, <b>29</b> ,<br>2229-2233        |
| 749 | teupestalin B                                                                                                                            | —                          | —           | —                           | —            | —          | —  | —           | —  |                                    |                                                                  |
| 750 | teubutilin A                                                                                                                             | —                          | —           | —                           | —            | —          | —  | —           | —  | <i>Teucrium<br/>abutiloides</i>    | <i>Phytochemistry</i> ,<br>1990, <b>29</b> ,<br>579-584          |
| 751 | 3 $\alpha$ -angeloyloxy-4 $\beta$ ,10 $\beta$ -dihydroxy-8 $\beta$ ,17,15,16-bis-epoxy- <i>cis</i> -clerodane-13(16),14-dien-20,12-olide | $\alpha$ OAng              | —           | —                           | —            | —          | —  | —           | —  | <i>Pteronia<br/>incana</i>         | <i>Phytochemistry</i> ,<br>1990, <b>29</b> ,<br>1231-1245        |
| 752 | 3 $\alpha$ -acetoxy-4 $\beta$ ,10 $\beta$ -dihydroxy-8 $\beta$ ,17,15,16-bis-epoxy- <i>cis</i> -clerodane-13(16),14-dien-20,12-olide     | $\alpha$ OAc               | —           | —                           | —            | —          | —  | —           | —  |                                    |                                                                  |
| 753 | 3 $\alpha$ ,4 $\beta$ ,10 $\beta$ -trihydroxy-8 $\beta$ ,17,15,16-bis-epoxy- <i>cis</i> -clerodane-13(16),14-dien-20,12-olide            | $\alpha$ OH                | —           | —                           | —            | —          | —  | —           | —  |                                    |                                                                  |
| 754 | korberin A                                                                                                                               | $\beta$ CO <sub>2</sub> Me | $\alpha$ Me | $\alpha$ CO <sub>2</sub> Me | H            | =O         | —  | —           | —  | <i>Croton<br/>lechleri</i>         | <i>Phytochemistry</i> ,<br>1993, <b>34</b> ,<br>265-268          |
| 755 | —                                                                                                                                        | $\beta$ Me                 | $\beta$ Me  | H                           | =O           | =O         | —  | —           | —  | <i>Nardophyllum<br/>lanantum</i>   | <i>Phytochemistry</i> ,<br>1990, <b>29</b> ,<br>1227-1230        |
| 756 | eluterin J                                                                                                                               | H                          | $\alpha$ Me | H                           | $\alpha$ OAc | H          | H  | H           | =O | <i>Croton<br/>eluteria</i>         | <i>J. Agric. Food<br/>Chem.</i> , 2002,<br><b>50</b> , 5131-5138 |
| 757 | eluterin I                                                                                                                               | H                          | $\alpha$ Me | H                           | $\alpha$ OAc | H          | H  | $\beta$ OAc | H  |                                    |                                                                  |
| 758 | 3 $\alpha$ ,4 $\alpha$ -epoxy-6-oxo-15,16-epoxy-8 $\beta$ ,10 $\beta$ H- <i>cis</i> -clerodane-13(16),14-dien-20,12-olide                | H                          | $\beta$ Me  | =O                          | H            | H          | H  | =O          | H  | <i>Pteronia eenii</i>              | <i>Phytochemistry</i> ,<br>1990, <b>29</b> ,<br>1231-1245        |
| 759 | 3 $\alpha$ ,4 $\alpha$ -epoxy-8 $\beta$ -hydroxy-6-oxo-15,16-epoxy- <i>cis</i> -clerodane-13(16),14-dien-20,12-olide                     | H                          | $\beta$ Me  | =O                          | H            | OH         | H  | =O          | H  |                                    |                                                                  |
| 760 | 2 $\alpha$ -hydroxy-3 $\alpha$ ,4 $\alpha$ ,15,16-bis-epoxy-8 $\beta$ ,10 $\beta$ H- <i>ent</i> -cleroda-13(16),14-diene-20,12-olide     | $\alpha$ OH                | $\beta$ Me  | H                           | H            | H          | H  | =O          | H  | <i>Microglossa<br/>pyrrhopappa</i> | <i>Phytochemistry</i> ,<br>1990, <b>29</b> ,<br>3233-3241        |
| 761 | 6 $\beta$ ,10 $\beta$ -dihydroxy-3 $\alpha$ ,4 $\alpha$ ,15,16-bis-epoxy-8 $\beta$ H-cleroda-13(16),14-diene-20,12-olide                 | H                          | $\beta$ Me  | $\beta$ OH                  | H            | H          | OH | =O          | H  |                                    |                                                                  |
| 762 | 6 $\beta$ -angeloyloxy-10 $\beta$ -hydroxy-3 $\alpha$ ,4 $\alpha$ ,15,16-bis-epoxy-8 $\beta$ H-cleroda-13(16),14-diene-20,12-olide       | H                          | $\beta$ Me  | $\beta$ OAng                | H            | H          | OH | =O          | H  |                                    |                                                                  |

|            |                                                                                                                                             |   |            |              |   |   |    |    |   |                                    |                                                           |
|------------|---------------------------------------------------------------------------------------------------------------------------------------------|---|------------|--------------|---|---|----|----|---|------------------------------------|-----------------------------------------------------------|
| <b>763</b> | 6 $\beta$ -[2-methylbutyryloxy]-10 $\beta$ -hydroxy-3 $\alpha$ ,4 $\alpha$ ,15,16-bis-epoxy-8 $\beta$ H-cleroda-13(16),14-diene-20,12-olide | H | $\beta$ Me | $\beta$ MeBu | H | H | OH | =O | H |                                    |                                                           |
| <b>764</b> | crotonpene A                                                                                                                                | — | —          | —            | — | — | —  | —  | — | <i>Croton<br/>yanhuii</i>          | <i>Fitoterapia</i> ,<br>2014, <b>95</b> ,<br>229-233      |
| <b>765</b> | crotonpene B                                                                                                                                | — | —          | —            | — | — | —  | —  | — |                                    |                                                           |
| <b>766</b> | ravidin B                                                                                                                                   | — | —          | —            | — | — | —  | —  | — | <i>Nannoglottis<br/>ravida</i>     | <i>Phytochemistry</i> ,<br>2004, <b>65</b> ,<br>2533-2537 |
| <b>767</b> | 2 $\alpha$ -hydroxy-3 $\alpha$ ,4 $\alpha$ ,15,16-bis-epoxy-8 $\beta$ H- <i>ent</i> -cleroda-1(10),13(16),14-diene-20,12-olide              | — | —          | —            | — | — | —  | —  | — | <i>Microglossa<br/>pyrrhopappa</i> | <i>Phytochemistry</i> ,<br>1990, <b>29</b> ,<br>3233-3241 |

### 5.3. Type V Subtype III with a C-9-Spiro- $\gamma$ -lactol Moiety (Table 23)

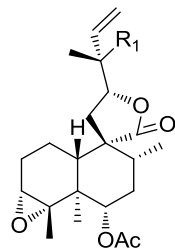

768,769

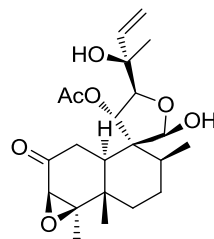

770

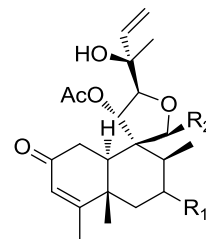

771-773

| No. | Compound Name      | R <sub>1</sub> | R <sub>2</sub> | Source                      | Ref.                                              |
|-----|--------------------|----------------|----------------|-----------------------------|---------------------------------------------------|
| 768 | heteroscypholide A | $\beta$ OAc    | —              | <i>Heteroscyphus planus</i> | <i>Phytochemistry</i> , 1996, <b>41</b> , 581-587 |
| 769 | heteroscypholide B | $\beta$ OH     | —              |                             |                                                   |
| 770 | heteroscyphone A   | —              | —              |                             | <i>Phytochemistry</i> , 1995, <b>38</b> , 119-127 |
| 771 | heteroscyphone B   | H              | $\beta$ OH     |                             |                                                   |
| 772 | heteroscyphone C   | H              | H              |                             |                                                   |
| 773 | heteroscyphone D   | $\beta$ OH     | $\beta$ OH     |                             |                                                   |

### 5.4. Type V Subtype IV Other Compounds (Table 24)

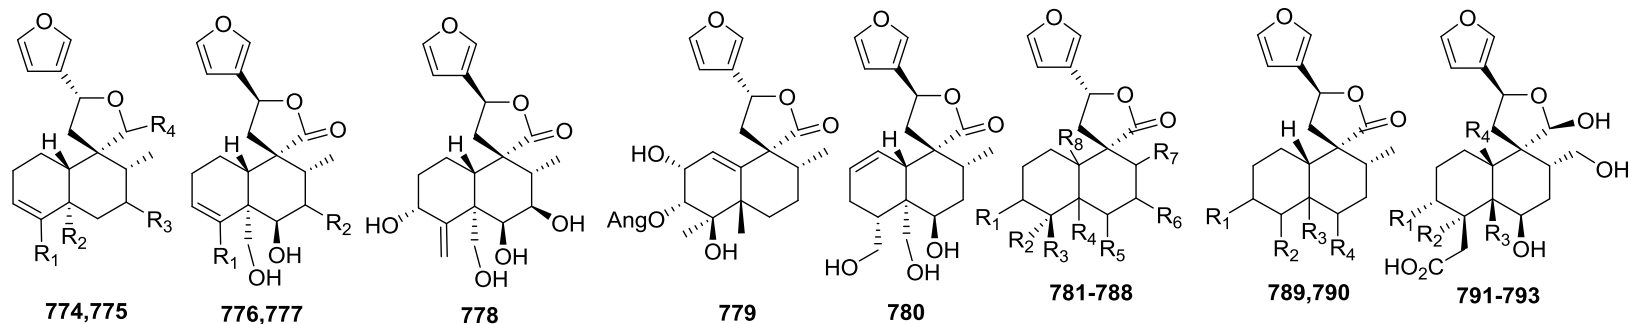

| No.              | Compound Name                                                                                      | R <sub>1</sub>     | R <sub>2</sub>     | R <sub>3</sub>     | R <sub>4</sub>      | R <sub>5</sub> | R <sub>6</sub> | R <sub>7</sub>   | R <sub>8</sub> | Source                      | Ref.                                                      |
|------------------|----------------------------------------------------------------------------------------------------|--------------------|--------------------|--------------------|---------------------|----------------|----------------|------------------|----------------|-----------------------------|-----------------------------------------------------------|
| 774              | eluterin H                                                                                         | Me                 | Me                 | αOAc               | βOAc                | —              | —              | —                | —              | <i>Croton eluteria</i>      | <i>J. Agric. Food Chem.</i> , 2002, <b>50</b> , 5131-5138 |
| 775              | crotocorylifuran                                                                                   | CO <sub>2</sub> Me | CO <sub>2</sub> Me | H                  | =O                  | —              | —              | —                | —              | <i>Croton haumanianus</i>   | <i>Tetrahedron</i> , 1990, <b>46</b> , 5199-5202          |
| 776 <sup>a</sup> | teupernin D                                                                                        | CO <sub>2</sub> Me | H                  | —                  | —                   | —              | —              | —                | —              | <i>Teucrium pernyi</i>      | <i>Phytochemistry</i> , 1993, <b>33</b> , 716-717         |
| 777              | teulolin A                                                                                         | CH <sub>2</sub> OH | βOH                | —                  | —                   | —              | —              | —                | —              | <i>Teucrium polium</i>      | <i>Phytochemistry</i> , 1999, <b>51</b> , 921-925         |
| 778              | teulolin B                                                                                         | —                  | —                  | —                  | —                   | —              | —              | —                | —              |                             |                                                           |
| 779              | 3α-angeloyloxy-2α,4β-dihydroxy-15,16-epoxy- <i>cis</i> -clerodane-1(10),13(16),14-dien-20,12-olide | —                  | —                  | —                  | —                   | —              | —              | —                | —              | <i>Pteronia eenii</i>       | <i>Phytochemistry</i> , 1990, <b>29</b> , 1231-1245       |
| 780              | teupolin VI                                                                                        | —                  | —                  | —                  | —                   | —              | —              | —                | —              | <i>Teucrium polium</i>      | <i>Phytochemistry</i> , 2011, <b>72</b> , 2037-2044       |
| 781              | sandrasin B                                                                                        | H                  | OH                 | CH <sub>2</sub> OH | αCH <sub>2</sub> OH | =O             | H              | αMe              | αOH            | <i>Teucrium sandrasicum</i> | <i>Phytochemistry</i> , 1996, <b>42</b> , 775-778         |
| 782              | 3α,4β,8β,10β-tetrahydroxy-15,16-epoxy- <i>cis</i> -clerodane-13(16),14-dien-20,12-olide            | αOH                | Me                 | OH                 | βMe                 | H              | H              | αMe              | βOH            | <i>Pteronia eenii</i>       | <i>Phytochemistry</i> , 1990, <b>29</b> , 1231-1245       |
| 783              | 3α-acetoxy-4β,8β,10β-trihydroxy-15,16-epoxy- <i>cis</i> -clerodane-13(16),14-dien-20,12-olide      | αOAc               | Me                 | OH                 | βMe                 | H              | H              | αMe              | βOH            |                             |                                                           |
| 784              | 3-oxo-4β,8β,10β-trihydroxy-15,16-epoxy- <i>cis</i> -clerodane-13(16),14-dien-20,12-olide           | =O                 | Me                 | OH                 | βMe                 | H              | H              | αMe              | βOH            |                             |                                                           |
| 785              | 3α,4β,10β-trihydroxy-15,16-epoxy- <i>cis</i> -clerodane-8(17),13(16),14-dien-20,12-olide           | αOH                | Me                 | OH                 | βMe                 | H              | H              | =CH <sub>2</sub> | βOH            |                             |                                                           |

|     |                                                                                                                              |               |                             |                             |                             |   |   |                  |            |                                      |                                                                     |
|-----|------------------------------------------------------------------------------------------------------------------------------|---------------|-----------------------------|-----------------------------|-----------------------------|---|---|------------------|------------|--------------------------------------|---------------------------------------------------------------------|
| 786 | 3-oxo-4 $\beta$ ,10 $\beta$ -dihydroxy-15,16-epoxy- <i>cis</i> -clerodane-8(17),13(16),14-dien-20,12-olide                   | =O            | Me                          | OH                          | $\beta$ Me                  | H | H | =CH <sub>2</sub> | $\beta$ OH |                                      |                                                                     |
| 787 | 3 $\alpha$ ,4 $\beta$ ,10 $\beta$ -trihydroxy-15,16-epoxy- <i>cis</i> -clerodane-13(16),14-dien-20,12-olide                  | $\alpha$ OH   | Me                          | OH                          | $\beta$ Me                  | H | H | $\alpha$ Me      | $\beta$ OH | <i>Pteronia</i><br><i>incana</i>     |                                                                     |
| 788 | 3 $\alpha$ -angeloyloxy-4 $\beta$ ,10 $\beta$ -dihydroxy-15,16-epoxy- <i>cis</i> -clerodane-8(17),13(16),14-dien-20,12-olide | $\alpha$ OAng | Me                          | OH                          | $\beta$ Me                  | H | H | =CH <sub>2</sub> | $\beta$ OH |                                      |                                                                     |
| 789 | korberin B                                                                                                                   | H             | $\beta$ CO <sub>2</sub> Me  | $\alpha$ Me                 | $\alpha$ CO <sub>2</sub> Me | — | — | —                | —          | <i>Croton</i><br><i>lechleri</i>     | <i>Phytochemistry</i> ,<br>1993, <b>34</b> , 265-268                |
| 790 | teuctomentin                                                                                                                 | $\beta$ OAc   | $\alpha$ CH <sub>2</sub> OH | $\alpha$ CH <sub>2</sub> OH | $\beta$ OH                  | — | — | —                | —          | <i>Teucrium</i><br><i>tomentosum</i> | <i>Der Pharmacia</i><br><i>Lettre</i> , 2014, <b>6</b> ,<br>295-298 |
| 791 | musabalbisiane A                                                                                                             | OH            | CO <sub>2</sub> H           | CHO                         | CHO                         | — | — | —                | —          | <i>Musa</i><br><i>balbisiana</i>     | <i>Phytochemistry</i> ,<br>1992, <b>31</b> , 2173-2175              |
| 792 | musabalbisiane B                                                                                                             | OH            | CHO                         | CO <sub>2</sub> H           | CH <sub>2</sub> OH          | — | — | —                | —          |                                      |                                                                     |
| 793 | musabalbisiane C                                                                                                             | OAng          | CH <sub>2</sub> OH          | CH <sub>2</sub> OH          | CH <sub>2</sub> OH          | — | — | —                | —          |                                      |                                                                     |

<sup>a</sup> Compound **1025** in Table 29 was also given the name 'teupernin D'.



## 6. Type VI with a Furofuran-based Side Chain at C-9

### 6.1. Type VI Subtype I with a Hexahydrofurofuran-based Side Chain at C-9 (Table 25)

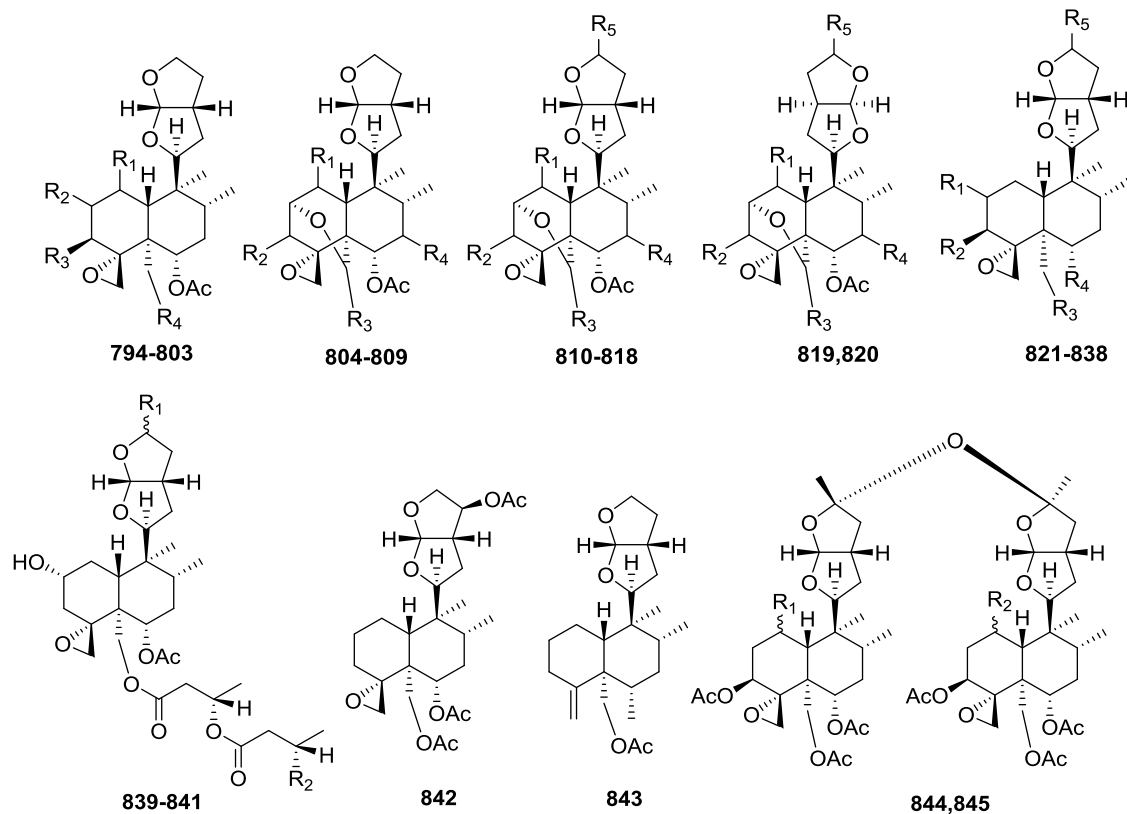

| No. | Compound Name | R <sub>1</sub>          | R <sub>2</sub> | R <sub>3</sub> | R <sub>4</sub> | R <sub>5</sub> | Source                  | Ref.                                                |
|-----|---------------|-------------------------|----------------|----------------|----------------|----------------|-------------------------|-----------------------------------------------------|
| 794 | lupulin F     | H                       | $\alpha$ OH    | OPr            | OAc            | —              | <i>Ajuga lupulina</i>   | <i>Indian J. Chem.</i> , 1999, <b>38B</b> , 743-745 |
| 795 | ajubractin C  | H                       | H              | MeBuO          | OAc            | —              | <i>Ajuga bracteosa</i>  | <i>J. Nat. Prod.</i> , 2011, <b>74</b> , 1036-1041  |
| 796 | ajubractin D  | H                       | $\alpha$ OH    | OiBu           | OAc            | —              |                         |                                                     |
| 797 | ajubractin E  | H                       | H              | OH             | OAc            | —              |                         |                                                     |
| 798 | areptin A     | $\beta$ OH              | $\alpha$ OAc   | Y <sub>1</sub> | OAc            | —              | <i>Ajuga reptans</i>    | <i>Phytochemistry</i> , 1998, <b>49</b> , 2443-2447 |
| 799 | ajugavensin A | $\beta$ OY <sub>1</sub> | H              | H              | OAc            | —              | <i>Ajuga genevensis</i> | <i>Phytochemistry</i> , 1991, <b>30</b> , 4083-4085 |

|     |                                                                                                                                       |               |                |                        |      |              |                                                     |                                                         |
|-----|---------------------------------------------------------------------------------------------------------------------------------------|---------------|----------------|------------------------|------|--------------|-----------------------------------------------------|---------------------------------------------------------|
| 800 | ajugavensin B                                                                                                                         | $\alpha$ OTig | H              | H                      | OAc  | —            |                                                     |                                                         |
| 801 | ajugavensin C                                                                                                                         | $\beta$ OH    | H              | H                      | OTig | —            |                                                     |                                                         |
| 802 | 3 $\beta$ -hydroxyajugavensin B                                                                                                       | $\alpha$ OTig | H              | OH                     | OAc  | —            | <i>Ajuga reptans</i>                                | <i>Phytochemistry</i> , 1998, <b>47</b> , 1227-1232     |
| 803 | ajugorientin                                                                                                                          | $\beta$ OTig  | H              | OH                     | OAc  | —            | <i>Ajuga orientalis</i>                             | <i>Phytochemistry</i> , 1997, <b>45</b> , 121-123       |
| 804 | ajugapyrin A                                                                                                                          | $\beta$ OH    | H              | $\beta$ OTig           | H    | —            | <i>Ajuga pyramidalis</i>                            | <i>Phytochemistry</i> , 1998, <b>47</b> , 303-305       |
| 805 | 14,15-dihydrojodrellin T                                                                                                              | $\beta$ OTig  | H              | OAc                    | H    | —            | <i>Scutellaria</i>                                  | <i>Phytochemistry</i> , 1990, <b>29</b> , 1793-1796     |
| 806 | scutegalin A                                                                                                                          | H             | H              | OTig                   | OTig | —            | <i>galericulata</i>                                 | <i>Phytochemistry</i> , 1993, <b>33</b> , 309-315       |
| 807 | scutecyprin                                                                                                                           | H             | H              | $\beta$ OTig           | H    | —            | <i>Scutellaria cypria</i><br>var. <i>elatior</i>    | <i>Phytochemistry</i> , 1993, <b>33</b> , 931-932       |
| 808 | scutecolumnin B                                                                                                                       | H             | H              | $\beta$ Y <sub>1</sub> | H    | —            | <i>Scutellaria columnae</i>                         | <i>Phytochemistry</i> , 1992, <b>31</b> , 3639-3641     |
| 809 | scutecolumnin C                                                                                                                       | H             | H              | $\beta$ OH             | H    | —            |                                                     |                                                         |
| 810 | scutecyprol B                                                                                                                         | H             | H              | $\beta$ OTig           | H    | OH           | <i>Scutellaria cypria</i><br>var. <i>cypria</i>     | <i>Phytochemistry</i> , 1996, <b>42</b> , 555-557       |
| 811 | scupolin K                                                                                                                            | H             | $\beta$ OH     | OiBu                   | H    | OH           | <i>Scutellaria polyodon</i>                         | <i>J. Nat. Prod.</i> , 2000, <b>63</b> , 1032-1034      |
| 812 | 6 $\alpha$ - <i>O</i> -acetyl-15 $\beta$ ,19 $\beta$ -di- <i>O</i> -ethyl-2,19:4,18:11,16:15,16-tetraepoxyneoclerodane-6,15,19-triol  | H             | H              | OEt                    | H    | $\beta$ OEt  | <i>Scutellaria discolor</i>                         | <i>Chem. Pharm. Bull.</i> , 1996, <b>44</b> , 1540-1545 |
| 813 | 6 $\alpha$ - <i>O</i> -acetyl-15 $\alpha$ ,19 $\beta$ -di- <i>O</i> -ethyl-2,19:4,18:11,16:15,16-tetraepoxyneoclerodane-6,15,19-triol | H             | H              | OEt                    | H    | $\alpha$ OEt |                                                     |                                                         |
| 814 | 6 $\alpha$ - <i>O</i> -acetyl-19 $\beta$ - <i>O</i> -ethyl-2,19:4,18:11,16:15,16-tetraepoxyneoclerodane-6,15,19-triol                 | H             | H              | OEt                    | H    | OH           |                                                     |                                                         |
| 815 | 6 $\alpha$ ,19-di- <i>O</i> -acetyl-2,19:4,18:11,16:15,16-tetraepoxy-neoclerodane-6,15,19-triol                                       | H             | H              | OAc                    | H    | OH           |                                                     |                                                         |
| 816 | scutalbin B                                                                                                                           | H             | H              | $\beta$ Y <sub>1</sub> | H    | OH           | <i>Scutellaria albida</i>                           | <i>Phytochemistry</i> , 1996, <b>42</b> , 1059-1064     |
| 817 | scutalbin C                                                                                                                           | H             | H              | $\beta$ OH             | H    | OH           |                                                     |                                                         |
| 818 | scutalsin                                                                                                                             | H             | H              | $\beta$ OiBu           | H    | OH           |                                                     |                                                         |
| 819 | 11-episcutecyprin                                                                                                                     | H             | H              | $\beta$ OTig           | H    | H            | <i>Scutellaria columnae</i>                         | <i>Phytochemistry</i> , 1997, <b>46</b> , 955-958       |
| 820 | 11-epi-scutecolumnin C                                                                                                                | H             | H              | $\beta$ OH             | H    | H            | <i>Scutellaria columnae</i><br>var. <i>columnae</i> | <i>Phytochemistry</i> , 1998, <b>49</b> , 811-815       |
| 821 | 15-epi-lupulin B                                                                                                                      | $\alpha$ OH   | MeBuO          | OAc                    | OAc  | $\alpha$ OMe | <i>Ajuga bracteosa</i>                              | <i>J. Nat. Prod.</i> , 2011, <b>74</b> , 1036-1041      |
| 822 | lupulin A                                                                                                                             | $\alpha$ OH   | Y <sub>1</sub> | OAc                    | OAc  | $\beta$ OMe  | <i>Ajuga lupulina</i>                               | <i>J. Nat. Prod.</i> , 1996, <b>59</b> , 668-670        |
| 823 | lupulin B                                                                                                                             | H             | Y <sub>1</sub> | OAc                    | OAc  | $\alpha$ OMe |                                                     |                                                         |
| 824 | (15 <i>S</i> )-14,15-dihydro-15-hydroxyajugachin A                                                                                    | $\alpha$ OH   | OiBu           | OAc                    | OAc  | $\beta$ OH   | <i>Ajuga salicifolia</i>                            | <i>Phytochemistry</i> , 1993, <b>34</b> , 1173-1175     |
| 825 | (15 <i>R</i> )-14,15-dihydro-15-hydroxyajugachin A                                                                                    | $\alpha$ OH   | OiBu           | OAc                    | OAc  | $\alpha$ OH  |                                                     |                                                         |
| 826 | 14,15-dihydro-15-oxoajugachin A                                                                                                       | $\alpha$ OH   | OiBu           | OAc                    | OAc  | =O           |                                                     |                                                         |

|     |                                                   |             |                 |      |     |              |                                                 |                                                         |
|-----|---------------------------------------------------|-------------|-----------------|------|-----|--------------|-------------------------------------------------|---------------------------------------------------------|
| 827 | hativene A                                        | $\alpha$ OH | OiBu            | OAc  | OAc | $\beta$ OMe  | <i>Ajuga pseudoiva</i>                          | <i>Fitoterapia</i> , 2000, <b>71</b> , 105-112          |
| 828 | hativene B                                        | $\alpha$ OH | OiBu            | OAc  | OAc | $\alpha$ OMe |                                                 |                                                         |
| 829 | hativene C                                        | $\beta$ OH  | OiBu            | OAc  | OAc | $\alpha$ OMe |                                                 |                                                         |
| 830 | 15-methoxy-14,15-dihydro-3-epicaryoptin           | H           | OAc             | OAc  | OAc | $\beta$ OMe  | <i>Clerodendrum inerme</i>                      | <i>Phytochemistry</i> , 1992, <b>31</b> , 338-340       |
| 831 | 14,15-dihydro-15 $\beta$ -methoxy-3-epicaryoptin  | H           | OAc             | OAc  | OAc | OH           |                                                 | <i>Phytochemistry</i> , 2005, <b>66</b> , 643-648       |
| 832 | 15 $\beta$ -ethoxy-14-hydroclerodin               | H           | H               | OAc  | OAc | $\beta$ OEt  | <i>Scutellaria discolor</i>                     | <i>Chem. Pharm. Bull.</i> , 1996, <b>44</b> , 1540-1545 |
| 833 | 15 $\alpha$ -ethoxy-14-hydroclerodin              | H           | H               | OAc  | OAc | $\alpha$ OEt |                                                 |                                                         |
| 834 | 14-hydro-15-hydroxy-6- <i>O</i> -deacetylclerodin | H           | H               | OAc  | OH  | OH           |                                                 |                                                         |
| 835 | scutelaterin C                                    | Y1          | H               | OAc  | OAc | OH           | <i>Scutellaria lateriflora</i>                  | <i>Phytochemistry</i> , 1998, <b>48</b> , 687-691       |
| 836 | scutellin A                                       | H           | H               | OPr  | OAc | $\beta$ OMe  | <i>Scutellaria barbata</i>                      | <i>Yunnan Zhiwu Yanjiu</i> , 2009, <b>31</b> , 474-476  |
| 837 | scutalpin O                                       | H           | H               | OiBu | OAc | OH           | <i>Scutellaria alpina</i>                       | <i>Phytochemistry</i> , 1998, <b>49</b> , 2449-2452     |
| 838 | scutecyprol A                                     | H           | H               | OAc  | OAc | OH           | <i>Scutellaria cypria</i><br>var. <i>cypria</i> | <i>Phytochemistry</i> , 1996, <b>42</b> , 555-557       |
| 839 | scupontin C                                       | H           | OAc             | —    | —   | —            | <i>Scutellaria pontica</i>                      | <i>J. Nat. Prod.</i> , 1997, <b>60</b> , 348-355        |
| 840 | scupontin D                                       | OH          | OAc             | —    | —   | —            |                                                 |                                                         |
| 841 | scupontin F                                       | OH          | OX <sub>6</sub> | —    | —   | —            |                                                 |                                                         |
| 842 | scutalpin M                                       | —           | —               | —    | —   | —            | <i>Scutellaria alpina</i>                       | <i>Phytochemistry</i> , 1995, <b>38</b> , 181-187       |
| 843 | lupulin C                                         | —           | —               | —    | —   | —            | <i>Ajuga lupulina</i>                           | <i>J. Nat. Prod.</i> , 1996, <b>59</b> , 668-670        |
| 844 | inerme A                                          | H           | H               | —    | —   | —            | <i>Clerodendrum inerme</i>                      | <i>Phytochemistry</i> , 2005, <b>66</b> , 643-648       |
| 845 | inerme B                                          | OMe/H       | H/OMe           | —    | —   | —            |                                                 |                                                         |

## 6.2. Type VI Subtype II with a Tetrahydrofurofuran-based Side Chain at C-9 (Table 26)

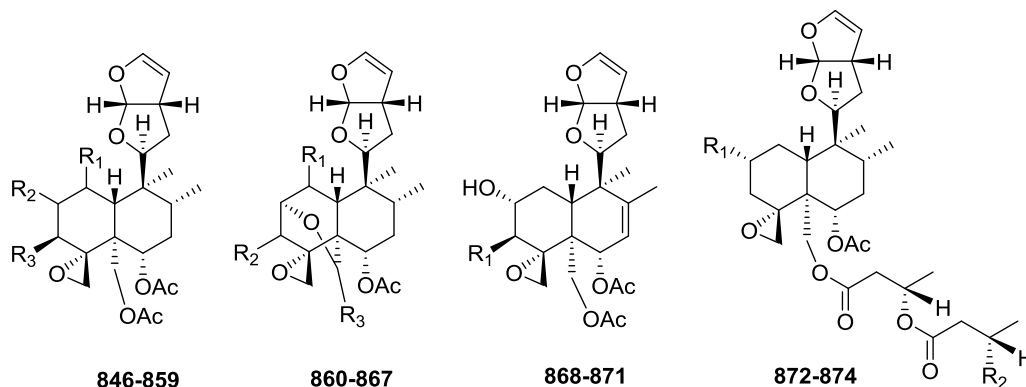

| No. | Compound Name               | R <sub>1</sub>         | R <sub>2</sub>         | R <sub>3</sub>  | Source                          | Ref.                                                    |
|-----|-----------------------------|------------------------|------------------------|-----------------|---------------------------------|---------------------------------------------------------|
| 846 | lupulin E                   | H                      | $\alpha$ OH            | OPr             | <i>Ajuga lupulina</i>           | <i>Indian J. Chem.</i> , 1999, <b>38B</b> , 743-745     |
| 847 | ajugachin A                 | H                      | $\alpha$ OH            | OiBu            | <i>Ajuga chamaepitys</i>        | <i>Phytochemistry</i> , 1990, <b>29</b> , 2931-2933     |
| 848 | ajugachin B                 | H                      | $\alpha$ OH            | Y <sub>11</sub> |                                 |                                                         |
| 849 | clerodendrin B              | H                      | $\alpha$ OH            | Y <sub>3</sub>  | <i>Clerodendrum inerme</i>      | <i>Phytochemistry</i> , 1993, <b>34</b> , 572-574       |
| 850 | clerodendrin C              | H                      | $\alpha$ OH            | Y <sub>10</sub> |                                 |                                                         |
| 851 | clerodendrin H              | H                      | $\alpha$ OH            | Y <sub>7</sub>  | <i>Clerodendrum trichotomum</i> | <i>Phytochemistry</i> , 1998, <b>49</b> , 1975-1980     |
| 852 | galericulinal               | H                      | $\alpha$ OH            | OTig            | <i>Scutellaria galericulata</i> | <i>Phytochemistry</i> , 1990, <b>29</b> , 1793-1796     |
| 853 | scutelaterin A              | H                      | $\beta$ OAc            | H               | <i>Scutellaria lateriflora</i>  | <i>Phytochemistry</i> , 1998, <b>48</b> , 687-691       |
| 854 | scutelaterin B              | H                      | $\beta$ Y <sub>1</sub> | H               |                                 |                                                         |
| 855 | ajubractin A                | H                      | H                      | MeBuO           | <i>Ajuga bracteosa</i>          | <i>J. Nat. Prod.</i> , 2011, <b>74</b> , 1036-1041      |
| 856 | ajubractin B                | H                      | H                      | iBuO            |                                 |                                                         |
| 857 | ajugapitin                  | H                      | $\alpha$ OH            | MeBuO           |                                 |                                                         |
| 858 | areptin B                   | $\beta$ OTig           | H                      | OH              | <i>Ajuga reptans</i>            | <i>Phytochemistry</i> , 1998, <b>49</b> , 2443-2447     |
| 859 | 14,15-dehydroajugareptansin | $\beta$ Y <sub>1</sub> | H                      | OH              |                                 | <i>Phytochemistry</i> , 1998, <b>47</b> , 1227-1232     |
| 860 | jodrellin A                 | H                      | H                      | $\beta$ OAc     | <i>Scutellaria</i> spp.         | <i>Phytochemistry</i> , 1991, <b>30</b> , 1125-1127     |
| 861 | jodrellin B                 | H                      | H                      | $\beta$ OiPr    |                                 |                                                         |
| 862 | scupolin J                  | H                      | $\beta$ OH             | OiBu            | <i>Scutellaria polyodon</i>     | <i>J. Nat. Prod.</i> , 2000, <b>63</b> , 1032-1034      |
| 863 | jodrellin T                 | $\beta$ OTig           | H                      | $\beta$ OAc     | <i>Scutellaria galericulata</i> | <i>Phytochemistry</i> , 1990, <b>29</b> , 1793-1796     |
| 864 | 19-O-deacetyl jodrellin A   | H                      | H                      | OH              | <i>Scutellaria discolor</i>     | <i>Chem. Pharm. Bull.</i> , 1996, <b>44</b> , 1540-1545 |

|            |                 |                 |                |                        |                                 |                                                                   |
|------------|-----------------|-----------------|----------------|------------------------|---------------------------------|-------------------------------------------------------------------|
| <b>865</b> | scutegrossin A  | H               | H              | $\beta$ OTig           | <i>Scutellaria grossa</i>       | <i>Chem. Pharm. Bull.</i> , 1997, <b>45</b> , 1097-1100           |
| <b>866</b> | scutalbin A     | H               | H              | $\beta$ OH             | <i>Scutellaria albida</i>       | <i>Phytochemistry</i> , 1996, <b>42</b> , 1059-1064               |
| <b>867</b> | scutecolumnin A | H               | H              | $\beta$ Y <sub>1</sub> | <i>Scutellaria columnae</i>     | <i>Phytochemistry</i> , 1992, <b>31</b> , 3639-3641               |
| <b>868</b> | clerodendrin I  | Y <sub>6</sub>  |                | —                      | <i>Clerodendrum trichotomum</i> | <i>Biosci. Biotechnol. Biochem.</i> , 1999, <b>63</b> , 1795-1797 |
| <b>869</b> | clerodendrin E  | Y <sub>10</sub> |                | —                      |                                 | <i>Phytochemistry</i> , 1998, <b>49</b> , 1975-1980               |
| <b>870</b> | clerodendrin F  | Y <sub>7</sub>  |                | —                      |                                 |                                                                   |
| <b>871</b> | clerodendrin G  | Y <sub>1</sub>  |                | —                      |                                 |                                                                   |
| <b>872</b> | scupontin A     | OH              | OAc            | —                      | <i>Scutellaria pontica</i>      | <i>J. Nat. Prod.</i> , 1997, <b>60</b> , 348-355                  |
| <b>873</b> | scupontin B     | H               | OAc            | —                      |                                 |                                                                   |
| <b>874</b> | scupontin E     | OH              | X <sub>6</sub> | —                      |                                 |                                                                   |

7 Type VII with a 13-Spiro-15,16- $\gamma$ -lactone Moiety (Table 27)

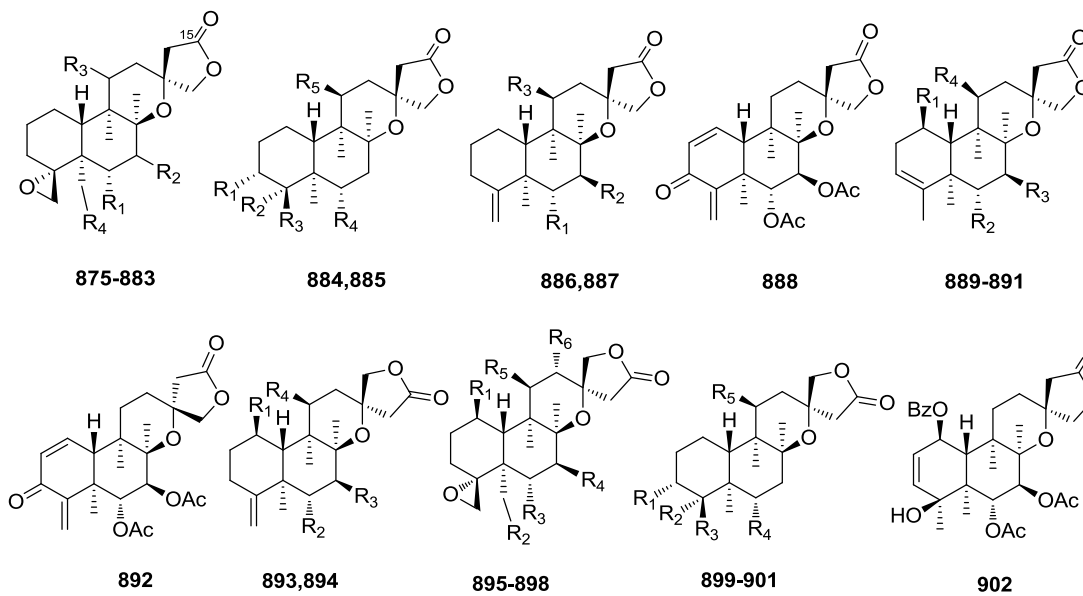

| No. | Compound Name                   | R <sub>1</sub> | R <sub>2</sub> | R <sub>3</sub> | R <sub>4</sub> | R <sub>5</sub> | R <sub>6</sub> | Source                                                  | Ref.                                                  |
|-----|---------------------------------|----------------|----------------|----------------|----------------|----------------|----------------|---------------------------------------------------------|-------------------------------------------------------|
| 875 | scutorientalin A                | OiBu           | H              | H              | OAc            |                |                | <i>Scutellaria orientalis</i> subsp. <i>pinnatifida</i> | <i>Phytochemistry</i> , 1996, <b>43</b> , 173-178     |
| 876 | scutorientalin C                | OiBu           | H              | $\alpha$ OH    | OAc            |                |                |                                                         | <i>Phytochemistry</i> , 1997, <b>44</b> , 121-124     |
| 877 | scutorientalin D                | OiBu           | H              | $\beta$ OAc    | OAc            |                |                |                                                         |                                                       |
| 878 | scutalpin D                     | OTig           | H              | $\beta$ OAc    | OAc            |                |                | <i>Scutellaria alpina</i> subsp. <i>javallambrensis</i> | <i>Phytochemistry</i> , 1993, <b>34</b> , 1589-1594   |
| 879 | 11-deacetylscutalpin D          | OTig           | H              | $\beta$ OH     | OAc            |                |                |                                                         | <i>Phytochemistry</i> , 1997, <b>44</b> , 593-597     |
| 880 | scutalpin A                     | Y <sub>1</sub> | $\beta$ OAc    | H              | OAc            |                |                | <i>Scutellaria alpina</i>                               | <i>Phytochemistry</i> , 1993, <b>34</b> , 453-456     |
| 881 | scutalpin F                     | OAc            | $\beta$ OAc    | H              | OAc            |                |                |                                                         | <i>Phytochemistry</i> , 1994, <b>35</b> , 1285-1288   |
| 882 | scutalpin G                     | OBz            | H              | $\beta$ OAc    | OAc            |                |                |                                                         | <i>Phytochemistry</i> , 1995, <b>38</b> , 181-187     |
| 883 | hastifolin C                    | OCin           | H              | H              | H              |                |                | <i>Scutellaria hastifolia</i>                           | <i>Phytochemistry</i> , 2010, <b>71</b> , 2087-2091   |
| 884 | scuterivulactone C <sub>2</sub> | OH             | Me             | OH             | OBz            | OAc            |                | <i>Scutellaria rivularis</i>                            | <i>Chem. Pharm. Bull.</i> , 1997, <b>45</b> , 152-160 |

|     |                                 |      |      |                    |      |     |      |                                                        |                                                             |
|-----|---------------------------------|------|------|--------------------|------|-----|------|--------------------------------------------------------|-------------------------------------------------------------|
| 885 | hastifolin E                    | H    | OH   | CH <sub>2</sub> OH | OCin | H   |      | <i>Scutellaria hastifolia</i>                          | <i>Phytochemistry</i> , 2010, <b>71</b> , 2087-2091         |
| 886 | hastifolin G                    | OCin | H    | H                  |      |     |      |                                                        |                                                             |
| 887 | barbatin A                      | H    | OBz  | OH                 | OBz  |     |      | <i>Scutellaria barbata</i>                             | <i>Phytochemistry</i> , 2006, <b>67</b> , 1326-1330         |
| 888 | barbatellarine E                |      |      |                    |      |     |      |                                                        | <i>Helv. Chim. Acta.</i> , 2011, <b>94</b> , 643-649        |
| 889 | barbatin B                      | OBz  | OBz  | OH                 |      |     |      |                                                        | <i>Phytochemistry</i> , 2006, <b>67</b> , 1326-1330         |
| 890 | scutebata D                     | OBz  | OAc  | OAc                | H    |     |      |                                                        | <i>J. Nat. Prod.</i> , 2010, <b>73</b> , 233-236            |
| 891 | scutebata E                     | OiBu | OAc  | OAc                | H    |     |      |                                                        | <i>Chem. Nat. Compds.</i> , 2014, <b>50</b> , 256-257       |
| 892 | barbatellarine F                |      |      |                    |      |     |      |                                                        |                                                             |
| 893 | scuteselerin                    | OAc  | OH   | Y <sub>12</sub>    | OAc  |     |      | <i>Scutellaria seleriana</i>                           | <i>Phytochemistry</i> , 1998, <b>47</b> , 135-137           |
| 894 | hastifolin F                    | H    | OCin | H                  | H    |     |      | <i>Scutellaria hastifolia</i>                          | <i>Phytochemistry</i> , 2010, <b>71</b> , 2087-2091         |
| 895 | hastifolin B                    | H    | H    | OCin               | H    | H   | H    |                                                        |                                                             |
| 896 | scutenisin                      | H    | OH   | OiBu               | OiBu | H   | H    | <i>Scutellaria orientalis</i> subsp. <i>sintenisii</i> | <i>Phytochemistry</i> , 1998, <b>49</b> , 1825-1827         |
| 897 | scutalpin E                     | H    | OAc  | OTig               | OAc  | H   | H    | <i>Scutellaria alpina</i>                              | <i>Phytochemistry</i> , 1994, <b>35</b> , 1285-1288         |
| 898 | scuteguatemalin                 | OiBu | H    | OAc                | H    | OAc | OiBu | <i>Scutellaria guatemalensis</i>                       | <i>Heterocycles</i> , 1997, <b>45</b> , 2247-2252           |
| 899 | hastifolin D                    | H    | OH   | CH <sub>2</sub> OH | OCin | H   |      | <i>Scutellaria hastifolia</i>                          | <i>Phytochemistry</i> , 2010, <b>71</b> , 2087-2091         |
| 900 | scuterivulactone C <sub>1</sub> | OH   | Me   | OH                 | OBz  | OAc |      | <i>Scutellaria rivularis</i>                           | <i>Chem. Pharm. Bull.</i> , 1997, <b>45</b> , 152-160       |
| 901 | scuterivulactone B              | =O   | Me   | H                  | OBz  | OAc |      |                                                        |                                                             |
| 902 | barbatellarine A                |      |      |                    |      |     |      | <i>Scutellaria barbata</i>                             | <i>Bioorg. Med. Chem. Lett.</i> , 2010, <b>20</b> , 288-290 |

## 8. Clerodane Diterpene Glycosides (Table 28)

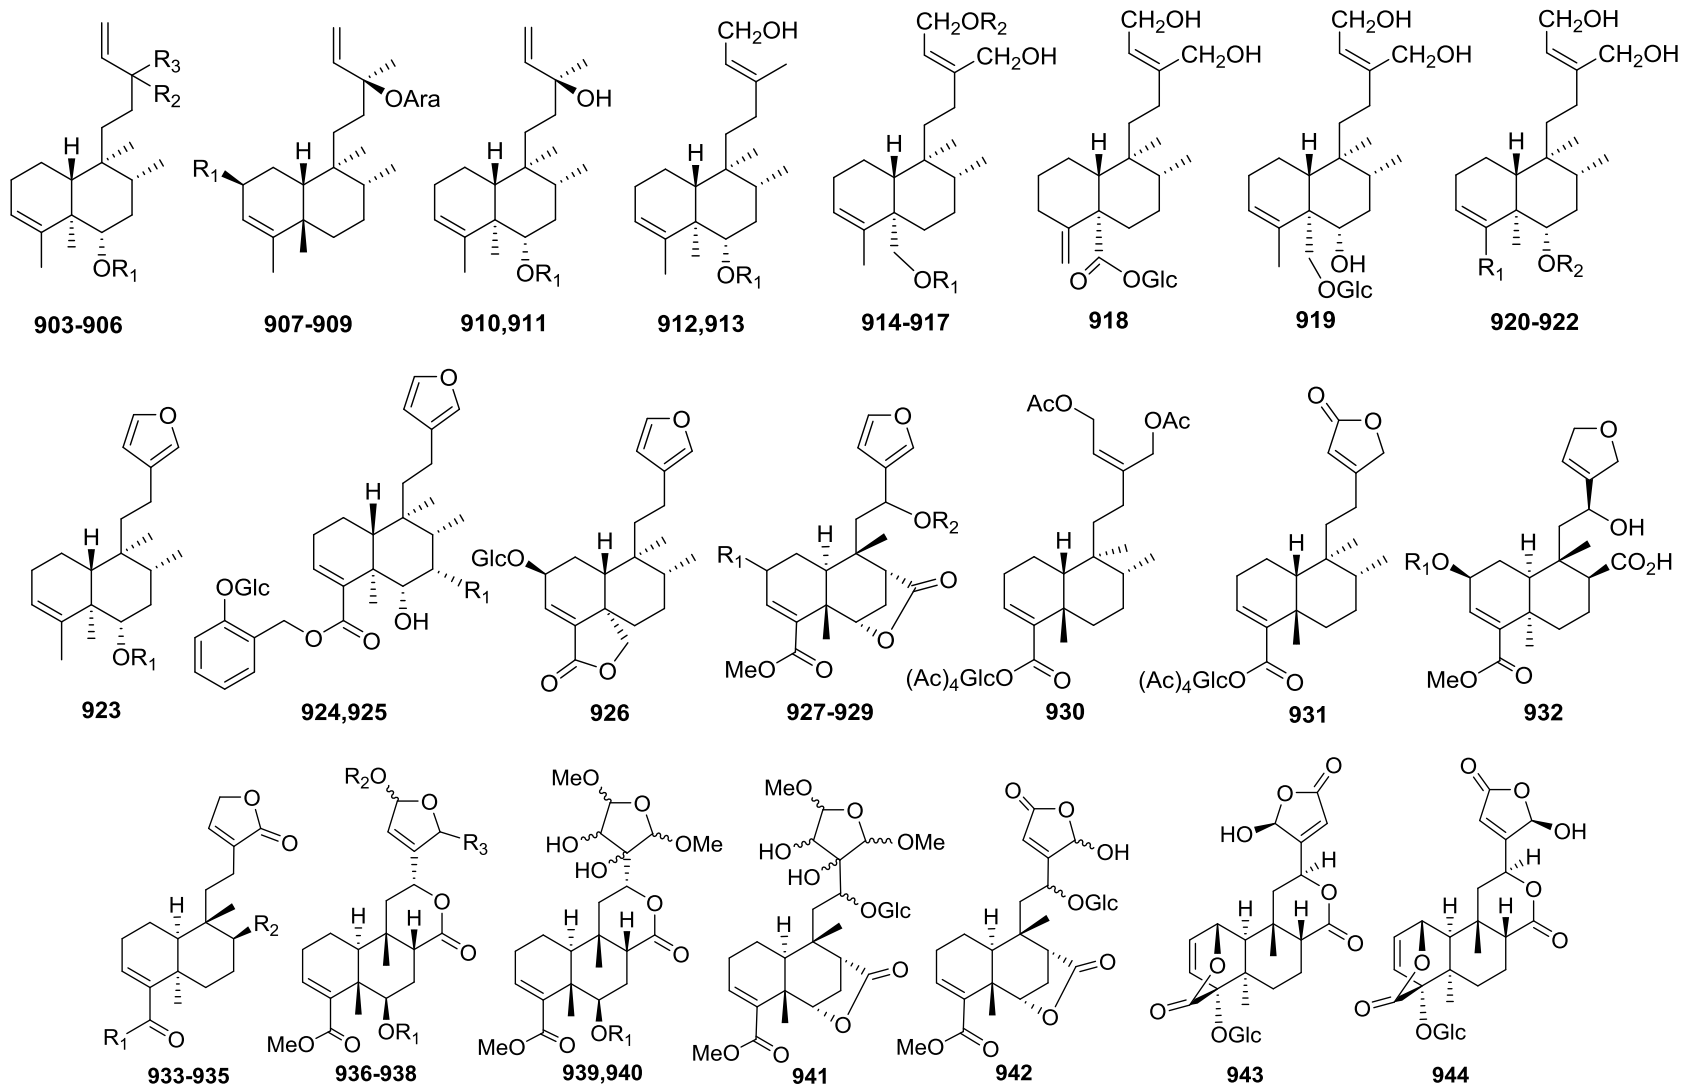



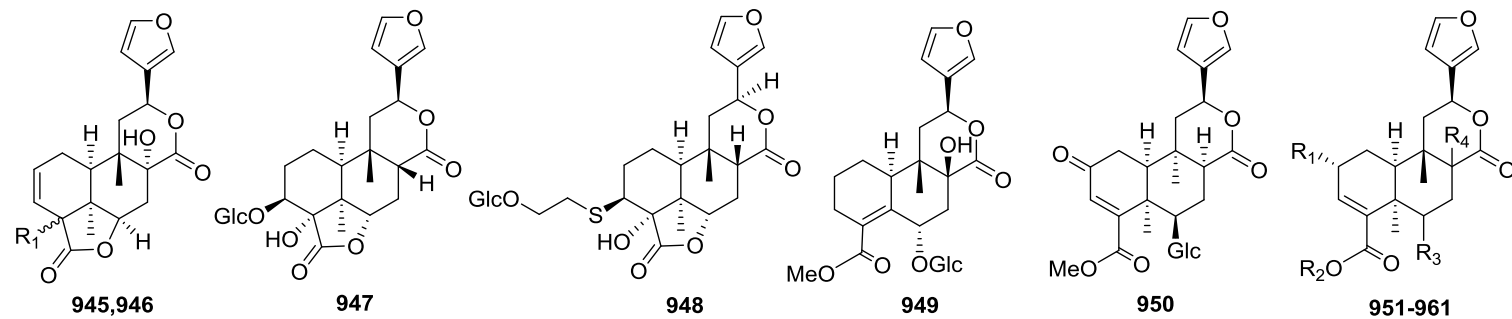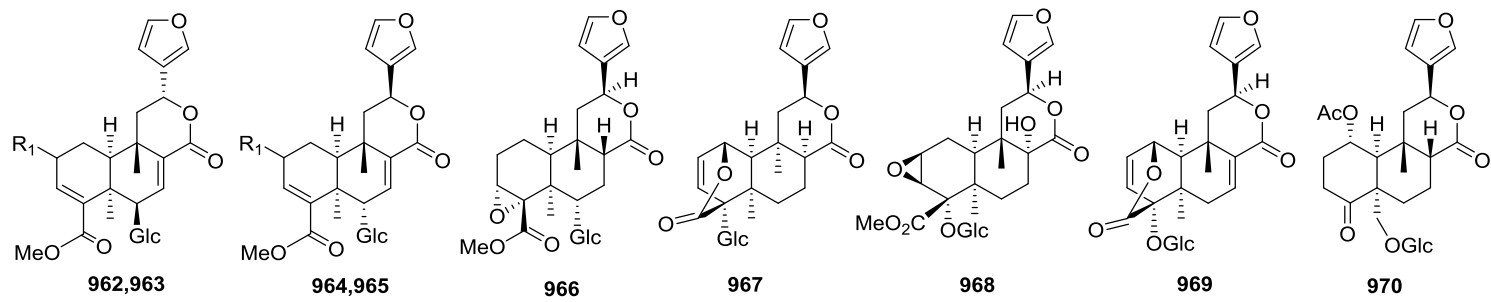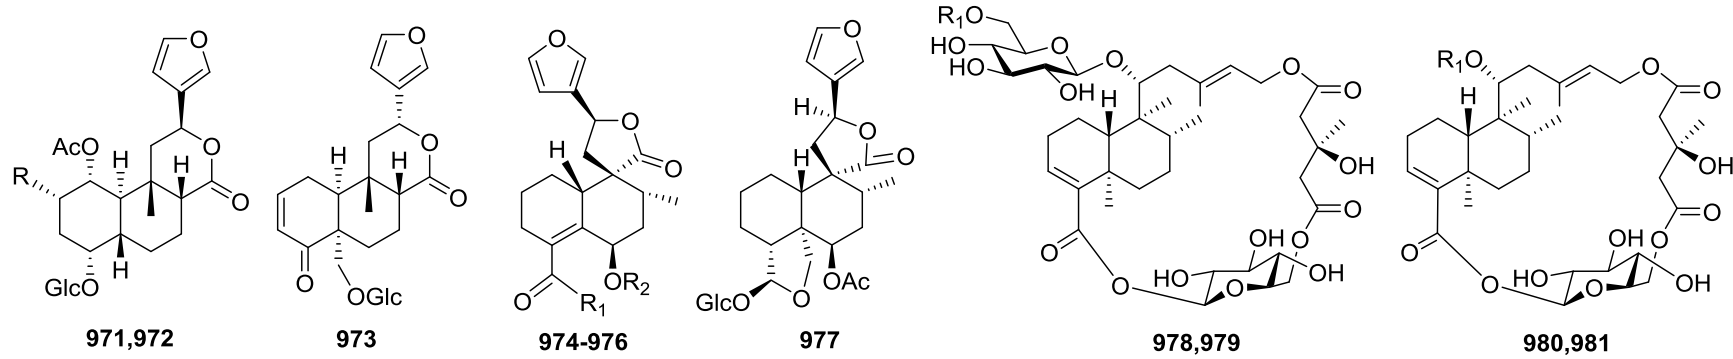

| No. | Compound Name                                                                                                                   | R <sub>1</sub> | R <sub>2</sub> | R <sub>3</sub> | R <sub>4</sub> | Source                     | Ref.                                  |
|-----|---------------------------------------------------------------------------------------------------------------------------------|----------------|----------------|----------------|----------------|----------------------------|---------------------------------------|
| 903 | $\alpha$ -vinyl-1,2,3,4,4a,7,8,8a-octahydro- $\alpha$ ,1,2,4a,5-pentamethyl-1-naphthalenepropanol-4-O- $\beta$ -glucopyranoside | $\beta$ -Glc   | OH             | Me             | —              | <i>Gleichenia japonica</i> | <i>Chem. Lett.</i> , 1991, 4, 701-704 |

|     |                                                                                                                                                                                                                                     |                                                                          |                                                                 |             |   |                                  |                                                   |
|-----|-------------------------------------------------------------------------------------------------------------------------------------------------------------------------------------------------------------------------------------|--------------------------------------------------------------------------|-----------------------------------------------------------------|-------------|---|----------------------------------|---------------------------------------------------|
| 904 | $\alpha$ -vinyl-1,2,3,4,4a,7,8,8a-octahydro- $\alpha$ ,1,2,4a,5-pentamethyl-1-naphthalenepropanol-4- <i>O</i> - $\alpha$ -rhamnopyranosyl-(1 $\rightarrow$ 2)- $\beta$ -glucopyranoside                                             | $\beta$ -Glc-(2 $\rightarrow$ 1)- $\alpha$ -L-Rha                        | OH                                                              | Me          | — |                                  |                                                   |
| 905 | (6 <i>S</i> ,13 <i>S</i> )-6- <i>O</i> -[ $\beta$ -D-glucopyranosyl-(1 $\rightarrow$ 4)- $\alpha$ -L-rhamnopyranosyl]-13- <i>O</i> -[ $\alpha$ -L-rhamnopyranosyl-(1 $\rightarrow$ 4)- $\beta$ -D-fucopyranosyl]-cleroda-3,14-diene | $\alpha$ -L-Rha-(4 $\rightarrow$ 1)- $\beta$ -D-Glc                      | $\beta$ -{ $\beta$ -D-Fuc-(4 $\rightarrow$ 1)- $\alpha$ -L-Rha} | $\alpha$ Me | — | <i>Dicranopteris pedata</i>      | <i>Phytochemistry</i> , 1997, <b>46</b> , 839-844 |
| 906 | (6 <i>S</i> ,13 <i>S</i> )-cleroda-3,14-diene-6,13-diol-6- <i>O</i> - $\beta$ -glucopyranosyl-13- <i>O</i> - $\beta$ -fucopyranosyl-(1 $\rightarrow$ 2)- $\alpha$ -rhamnopyranoside                                                 | $\beta$ -Glc                                                             | $\beta$ -{ $\alpha$ -Rha-(2 $\rightarrow$ 1)- $\beta$ -Fuc}     | $\alpha$ Me | — |                                  |                                                   |
| 907 | (5 <i>S</i> ,8 <i>R</i> ,9 <i>S</i> ,10 <i>R</i> ,13 <i>S</i> )-10 $\beta$ H-13- <i>O</i> - $\alpha$ -L-arabinopyranosyl-2-oxo-17 $\alpha$ ,19 $\beta$ ,20 $\alpha$ -trimethyl-3,14-clerodadiene                                    | =O                                                                       | —                                                               | —           | — |                                  |                                                   |
| 908 | (5 <i>S</i> ,8 <i>R</i> ,9 <i>S</i> ,10 <i>R</i> ,13 <i>S</i> )-10 $\beta$ H-13- <i>O</i> - $\alpha$ -L-arabinopyranosyl-17 $\alpha$ ,19 $\beta$ ,20 $\alpha$ -trimethyl-3,14-clerodadiene                                          | H                                                                        | —                                                               | —           | — | <i>Nannoglottis carpesioides</i> | <i>Fitoterapia</i> , 2014, <b>93</b> , 39-46      |
| 909 | (5 <i>S</i> ,8 <i>R</i> ,9 <i>S</i> ,10 <i>R</i> ,13 <i>S</i> )-10 $\beta$ H-13- <i>O</i> - $\alpha$ -L-arabinopyranosyl-2 $\beta$ -hydroperoxyl-17 $\alpha$ ,19 $\beta$ ,20 $\alpha$ -trimethyl-3,14-clerodadiene                  | OOH                                                                      | —                                                               | —           | — |                                  |                                                   |
| 910 | (6 <i>S</i> ,13 <i>S</i> )-6- <i>O</i> -[6- <i>O</i> -acetyl- $\beta$ -D-glucopyranosyl-(1 $\rightarrow$ 4)- $\alpha$ -L-rhamnopyranosyl]cleroda-3,14-dien-13-ol                                                                    | 6- <i>O</i> -acetyl- $\beta$ -D-Glc-(1 $\rightarrow$ 4)- $\alpha$ -L-Rha | —                                                               | —           | — | <i>Dicranopteris dichotoma</i>   | <i>J. Nat. Prod.</i> , 2007, <b>70</b> , 265-268  |
| 911 | (6 <i>S</i> ,13 <i>S</i> )-6- <i>O</i> -[4- <i>O</i> -acetyl- $\beta$ -D-glucopyranosyl-(1 $\rightarrow$ 4)- $\alpha$ -L-rhamnopyranosyl]cleroda-3,14-dien-13-ol                                                                    | 4- <i>O</i> -acetyl- $\beta$ -D-Glc-(1 $\rightarrow$ 4)- $\alpha$ -L-Rha | —                                                               | —           | — |                                  |                                                   |
| 912 | 6- <i>O</i> -[6- <i>O</i> -acetyl- $\beta$ -D-glucopyranosyl-(1-4)- $\alpha$ -L-rhamnopyranosyl]- (13 <i>E</i> )-cleroda-3,13-dien-15-ol                                                                                            | 6- <i>O</i> -acetyl- $\beta$ -D-Glc-(1 $\rightarrow$ 4)- $\alpha$ -L-Rha | —                                                               | —           | — |                                  |                                                   |

|     |                                                                                                                |                             |                             |   |   |                                                    |                                                     |
|-----|----------------------------------------------------------------------------------------------------------------|-----------------------------|-----------------------------|---|---|----------------------------------------------------|-----------------------------------------------------|
| 913 | 6- <i>O</i> -[β-D-glucopyranosyl]-(1→4)-α-L-rhamnopyranosyl-(13 <i>E</i> )-cleroda-3,13-dien-15-ol             | β-Glc-(1→4)-α-L-Rha         | —                           | — | — |                                                    |                                                     |
| 914 | cussoside A                                                                                                    | Glc                         | H                           | — | — | <i>Cussonia racemosa</i>                           | <i>Phytochemistry</i> , 2002, <b>60</b> , 339-343   |
| 915 | cussoside B                                                                                                    | Glc                         | Glc                         | — | — |                                                    |                                                     |
| 916 | cussoside C                                                                                                    | Glc                         | Api                         | — | — |                                                    |                                                     |
| 917 | cussoside D                                                                                                    | Glc-(6→1)-Api               | H                           | — | — |                                                    |                                                     |
| 918 | porwenin B                                                                                                     | —                           | —                           | — | — | <i>Portulaca okinawensis</i>                       | <i>J. Nat. Prod.</i> , 2001, <b>64</b> , 804-805    |
| 919 | pilosanol C                                                                                                    | —                           | —                           | — | — | <i>Portulaca pilosa</i>                            | <i>Phytochemistry</i> , 1991, <b>30</b> , 4075-4077 |
| 920 | salvigreside A                                                                                                 | Me                          | β-D-Glc                     | — | — | <i>Salvia greggii</i>                              | <i>Phytochemistry</i> , 2004, <b>65</b> , 2577-2581 |
| 921 | salvigreside B                                                                                                 | Me                          | 6- <i>O</i> -acetyl-β-D-Glc | — | — |                                                    |                                                     |
| 922 | salvigreside C                                                                                                 | CH <sub>2</sub> OH          | 6- <i>O</i> -acetyl-β-D-Glc | — | — |                                                    |                                                     |
| 923 | salvigreside D                                                                                                 | 6- <i>O</i> -acetyl-β-D-Glc | —                           | — | — |                                                    |                                                     |
| 924 | 6-hydroxy(-)-hardwickiic acid 2'-β-D-glucopyranosyl benzyl ester                                               | H                           | —                           | — | — | <i>Elsholtzia bodinieri</i>                        | <i>Indian J. Chem.</i> , 2008, <b>47B</b> , 166-170 |
| 925 | 6,7-dihydroxy(-)-hardwickiic acid 2'-β-D-glucopyranosyl benzyl ester                                           | OH                          | —                           | — | — |                                                    |                                                     |
| 926 | amarisolide                                                                                                    | —                           | —                           | — | — | <i>Salvia amarissima</i>                           | <i>Phytochemistry</i> , 1996, <b>42</b> , 1105-1108 |
| 927 | borapetoside D                                                                                                 | H                           | Glc-(6→1)-Glc               | — | — | <i>Tinospora tuberculata</i>                       | <i>Liebigs Ann. Chem.</i> , 1993, 491-495           |
| 928 | borapetoside E                                                                                                 | H                           | Glc                         | — | — |                                                    |                                                     |
| 929 | rumphioside I                                                                                                  | αOH                         | Glc                         | — | — | <i>Tinospora rumphii</i>                           | <i>Phytochemistry</i> , 1996, <b>42</b> , 153-158   |
| 930 | <i>cis</i> -cleroda-15,16-dihydroxy-3,13( <i>Z</i> )-dien-18- <i>O</i> -[β-D-galactopyranosyl]-peracetylesther | —                           | —                           | — | — | <i>Baccharis sagittalis</i>                        | <i>Phytochemistry</i> , 2002, <b>61</b> , 899-905   |
| 931 | <i>cis</i> -cleroda-3,13(14)-dien-15,16-olide-18- <i>O</i> -[β-D-galactopyranosyl]-peracetylesther             | —                           | —                           | — | — |                                                    |                                                     |
| 932 | sagittatayunnanoside B                                                                                         | Glc-(6→1)-Glc               |                             |   | — | <i>Tinospora sagittata</i> var. <i>yunnanensis</i> | <i>Planta Med.</i> , 2014, <b>80</b> , 419-425      |
| 933 | sagittatayunnanoside A                                                                                         | OH                          | CH <sub>2</sub> OGlc        |   |   |                                                    |                                                     |

|     |                                                                                                                                                                                                                                       |                      |                      |                            |    |                             |                                                     |
|-----|---------------------------------------------------------------------------------------------------------------------------------------------------------------------------------------------------------------------------------------|----------------------|----------------------|----------------------------|----|-----------------------------|-----------------------------------------------------|
| 934 | sagittatayunnanoside C                                                                                                                                                                                                                | OGlc                 | CH <sub>2</sub> OGlc |                            |    |                             |                                                     |
| 935 | sagittatayunnanoside D                                                                                                                                                                                                                | OH                   | CO <sub>2</sub> Glc  | —                          | —  |                             |                                                     |
| 936 | rumphioside A                                                                                                                                                                                                                         | β-D-Glc              | H                    | =O                         | —  | <i>Tinospora rumphii</i>    | <i>Phytochemistry</i> , 1995, <b>40</b> , 1729-1736 |
| 937 | rumphioside B                                                                                                                                                                                                                         | β-D-Glc              | Me                   | =O                         | —  |                             |                                                     |
| 938 | rumphioside Ac-D                                                                                                                                                                                                                      | Glc(Ac) <sub>4</sub> | Me                   | OMe                        | —  |                             |                                                     |
| 939 | rumphioside C                                                                                                                                                                                                                         | β-D-Glc              | —                    | —                          | —  |                             |                                                     |
| 940 | rumphioside C-1                                                                                                                                                                                                                       | β-D-Glc              | —                    | —                          | —  |                             |                                                     |
| 941 | rumphioside E                                                                                                                                                                                                                         | —                    | —                    | —                          | —  |                             |                                                     |
| 942 | rumphioside F                                                                                                                                                                                                                         | —                    | —                    | —                          | —  |                             |                                                     |
| 943 | cordifolide B                                                                                                                                                                                                                         | —                    | —                    | —                          | —  | <i>Tinospora cordifolia</i> | <i>Org. Lett.</i> , 2012, <b>14</b> , 2118-2121     |
| 944 | cordifolide C                                                                                                                                                                                                                         | —                    | —                    | —                          | —  |                             |                                                     |
| 945 | fibrauretinioside A                                                                                                                                                                                                                   | αOGlc                | —                    | —                          | —  | <i>Fibraurea tinctoria</i>  | <i>J. Nat. Prod.</i> , 2007, <b>70</b> , 1930-1933  |
| 946 | <i>epi</i> -fibrauretinioside A                                                                                                                                                                                                       | βOGlc                | —                    | —                          | —  |                             |                                                     |
| 947 | borapetoside A                                                                                                                                                                                                                        | —                    | —                    | —                          | —  | <i>Tinospora crispa</i>     | <i>J. Nat. Prod.</i> , 2010, <b>73</b> , 541-547    |
| 948 | cordifolide A                                                                                                                                                                                                                         | —                    | —                    | —                          | —  | <i>Tinospora cordifolia</i> | <i>Org. Lett.</i> , 2012, <b>14</b> , 2118-2121     |
| 949 | cordioside                                                                                                                                                                                                                            | —                    | —                    | —                          | —  |                             | <i>Phytochemistry</i> , 1995, <b>38</b> , 447-449   |
| 950 | (5 <i>R</i> ,6 <i>R</i> ,8 <i>S</i> ,9 <i>R</i> ,10 <i>S</i> ,12 <i>S</i> )-15,16-epoxy-2-oxo-6- <i>O</i> -(β-D-glucopyranosyl)-cleroda-3,13(16),14-trien-17,12-olid-18-oic acid methyl ester                                         | —                    | —                    | —                          | —  |                             |                                                     |
| 951 | (2 <i>R</i> ,5 <i>R</i> ,6 <i>R</i> ,8 <i>S</i> ,9 <i>S</i> ,10 <i>S</i> ,12 <i>S</i> )-15,16-epoxy-2-hydroxy-6- <i>O</i> -{β-D-glucopyranosyl-(1→6)-α-D-xylopyranosyl}-cleroda-3,13(16),14-trien-17,12-olid-18-oic acid methyl ester | αOH                  | Me                   | β- {β-D-Glc-(1→6)-α-D-Xyl} | αH | <i>Tinospora crispa</i>     | <i>J. Nat. Prod.</i> , 2010, <b>73</b> , 541-547    |
| 952 | (2 <i>R</i> ,5 <i>R</i> ,6 <i>R</i> ,8 <i>R</i> ,9 <i>S</i> ,10 <i>S</i> ,12 <i>S</i> )-15,16-epoxy-2-hydroxy-6- <i>O</i> -(β-D-glucopyranosyl)-cleroda-3,13(16),14-trien-17,12-olid-18-oic acid methyl ester                         | αOH                  | Me                   | β-(β-D-Glc)                | βH |                             |                                                     |

|     |                                                                                                                                          |           |                |             |     |                              |                                                         |
|-----|------------------------------------------------------------------------------------------------------------------------------------------|-----------|----------------|-------------|-----|------------------------------|---------------------------------------------------------|
| 953 | (5R,6R,8S,9R,10R,12S)-15,16-epoxy-2-oxo-6-O-(β-D-glucopyranosyl)-cleroda-3,13(16),14-trien-17,12-olid-18-oic acid methyl ester           | =O        | Me             | β-(β-D-Glc) | αH  |                              |                                                         |
| 954 | epi-tinophyllololide                                                                                                                     | OGlc      | Me             | H           | αH  | <i>Tinospora capillipes</i>  | <i>Chin. Chem. Lett.</i> , 1992, <b>3</b> , 185-188     |
| 955 | tinospinoside A                                                                                                                          | OGlc      | Me             | H           | βH  | <i>Tinospora sagittata</i>   | <i>Planta Med.</i> , 2012, <b>78</b> , 82-85            |
| 956 | tinospinoside B                                                                                                                          | OGlc      | Me             | H           | βOH |                              |                                                         |
| 957 | tinospinoside C                                                                                                                          | OGlc      | Me             | H           | αOH |                              |                                                         |
| 958 | floribundic acid glucoside                                                                                                               | H         | Glc            | H           | αH  | <i>Penianthus zenkeri</i>    | <i>Phytochemistry</i> , 1991, <b>30</b> , 1957-1962     |
| 959 | zenkerin                                                                                                                                 | H         | -Xyl-(1→6)-Glc | H           | αH  |                              |                                                         |
| 960 | borapetoside C                                                                                                                           | H         | Me             | Glc         | H   | <i>Tinospora tuberculata</i> | <i>Liebigs Ann. Chem.</i> , 1993, 491-495               |
| 961 | borapetoside G                                                                                                                           | =O        | Me             | Glc         | H   |                              |                                                         |
| 962 | borapetoside F                                                                                                                           | H         | —              | —           | —   |                              |                                                         |
| 963 | tinoscorside C                                                                                                                           | αOH       | —              | —           | —   | <i>Tinospora cordifolia</i>  | <i>Fitoterapia</i> , 2010, <b>81</b> , 485-489          |
| 964 | (2R,5R,6S,9S,10S,12S)-15,16-epoxy-2-hydroxy-6-O-(β-D-glucopyranosyl)-cleroda-3,7,13(16),14-tetraen-17,12-olid-18-oic acid methyl ester   | αOH       | —              | —           | —   | <i>Tinospora crispa</i>      | <i>J. Nat. Prod.</i> , 2010, <b>73</b> , 541-547        |
| 965 | (5R,6S,9S,10S,12S)-15,16-epoxy-2-oxo-6-O-(β-D-glucopyranosyl)-cleroda-3,7,13(16),14-tetraen-17,12-olid-18-oic acid methyl ester          | =O        | —              | —           | —   |                              |                                                         |
| 966 | (3R,4R,5R,6S,8R,9S,10S,12S)-15,16-epoxy-3,4-epoxy-6-O-(β-D-glucopyranosyl)-cleroda-3,13(16),14-trien-17,12-olid-18-oic acid methyl ester | —         | —              | —           | —   |                              |                                                         |
| 967 | (1R,4S,5R,8S,9R,10S,12S)-15,16-epoxy-4-O-(β-D-glucopyranosyl)-cleroda-2,13(16),14-triene-17(12),18(1)-diolide                            | —         | —              | —           | —   |                              |                                                         |
| 968 | tinospinoside D                                                                                                                          | —         | —              | —           | —   | <i>Tinospora sagittata</i>   | <i>Chem. Pharm. Bull.</i> , 2012, <b>60</b> , 1324-1328 |
| 969 | tinospinoside E                                                                                                                          | —         | —              | —           | —   |                              |                                                         |
| 970 | tinospinenside A                                                                                                                         | —         | —              | —           | —   | <i>Tinospora sinensis</i>    | <i>J. Nat. Prod.</i> , 2007, <b>70</b> , 1971-1976      |
| 971 | tinospinenside B                                                                                                                         | OAc       | —              | —           | —   |                              |                                                         |
| 972 | tinospinenside C                                                                                                                         | OH        | —              | —           | —   |                              |                                                         |
| 973 | epi-12-palmatoside G                                                                                                                     | —         | —              | —           | —   | <i>Fibraurea tinctoria</i>   | <i>J. Nat. Prod.</i> , 2007, <b>70</b> , 1930-1933      |
| 974 | chamaedryoside A                                                                                                                         | OH        | Glc            | —           | —   | <i>Teucrium chamaedrys</i>   | <i>Magn. Reson. Chem.</i> , 2009, <b>47</b> , 1007-1012 |
| 975 | chamaedryoside B                                                                                                                         | O-6-α-Glc | H              | —           | —   |                              |                                                         |

|            |                               |                         |   |   |   |                                                               |                                                     |
|------------|-------------------------------|-------------------------|---|---|---|---------------------------------------------------------------|-----------------------------------------------------|
| <b>976</b> | chamaedryoside C              | O-6-β-Glc               | H | — | — |                                                               |                                                     |
| <b>977</b> | teulamioside                  | —                       | — | — | — | <i>Teucrium lamiiifolium</i>                                  | <i>Phytochemistry</i> , 1993, <b>34</b> , 1095-1098 |
| <b>978</b> | syphonoside                   | H                       | — | — | — | <i>Syphonota geographica</i> ,<br><i>Halophila stipulacea</i> | <i>J. Org. Chem.</i> , 2007, <b>72</b> , 5625-5630  |
| <b>979</b> | 6''-acetyl syphonoside        | Ac                      | — | — | — |                                                               | <i>Tetrahedron</i> , 2008, <b>64</b> , 191-196      |
| <b>980</b> | syphonosideol                 | H                       | — | — | — |                                                               |                                                     |
| <b>981</b> | mixture of syphonoside esters | palmitic & stearic acid | — | — | — |                                                               |                                                     |

## 9. Clerodane Derivatives

### 9.1. N (or S or Cl)-Containing Derivatives (Table 29)

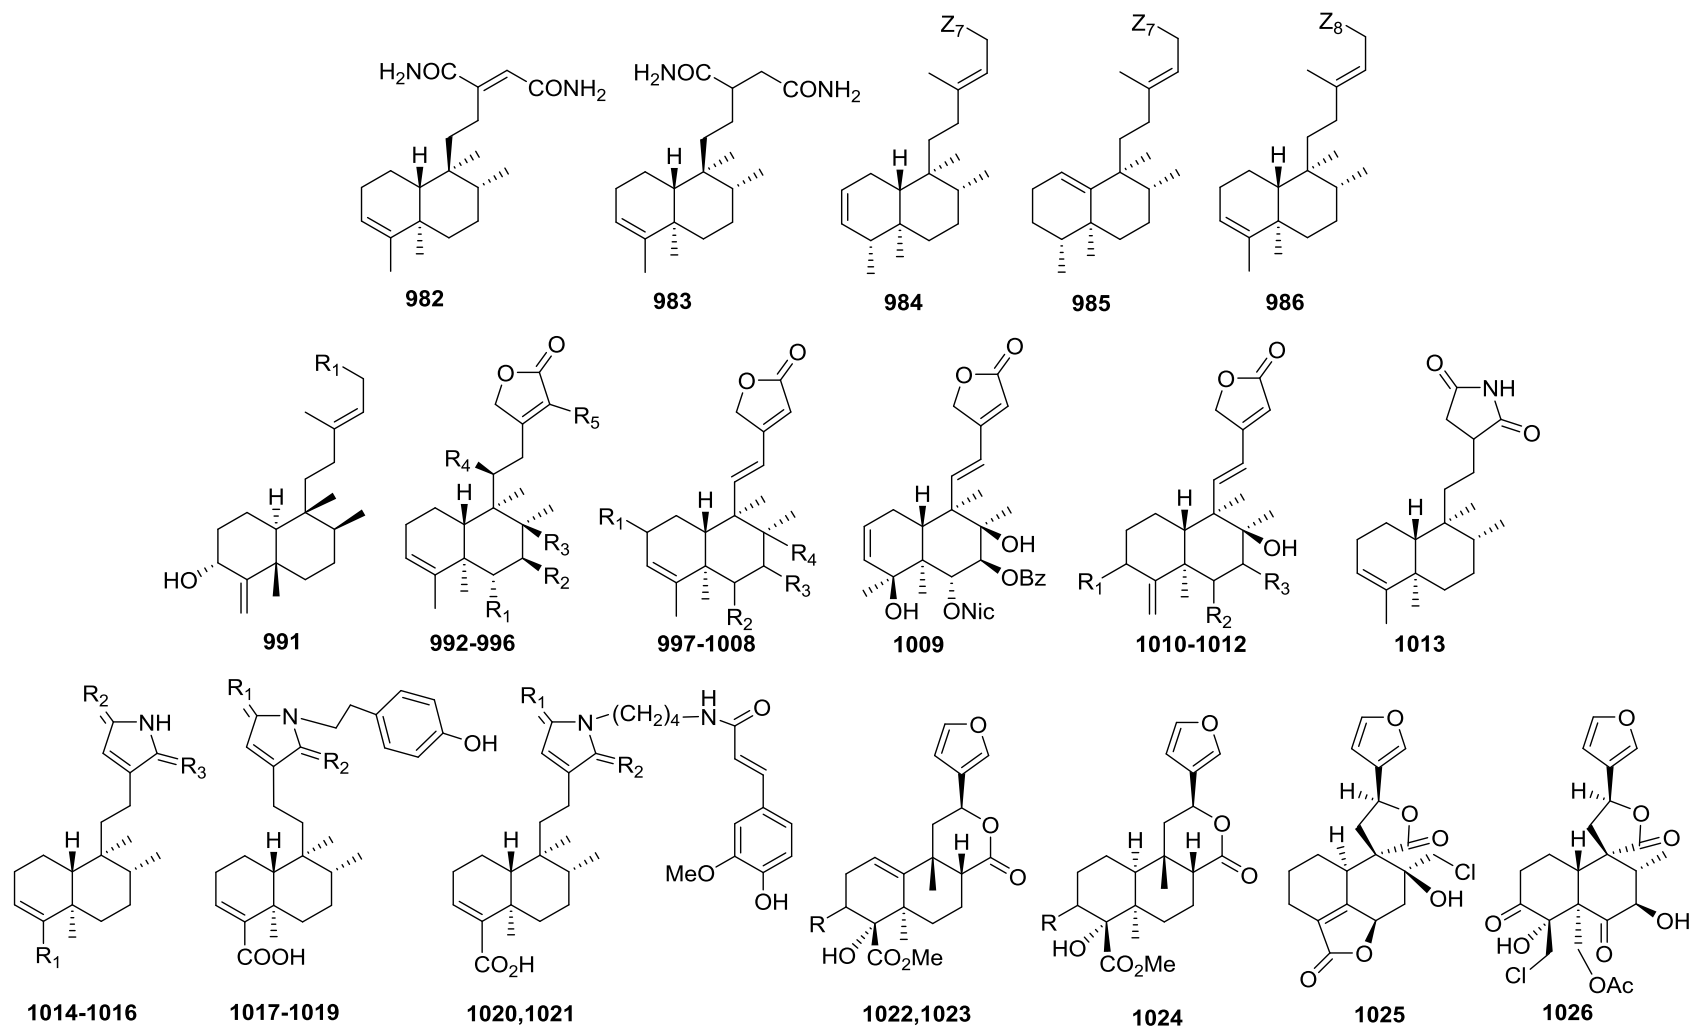

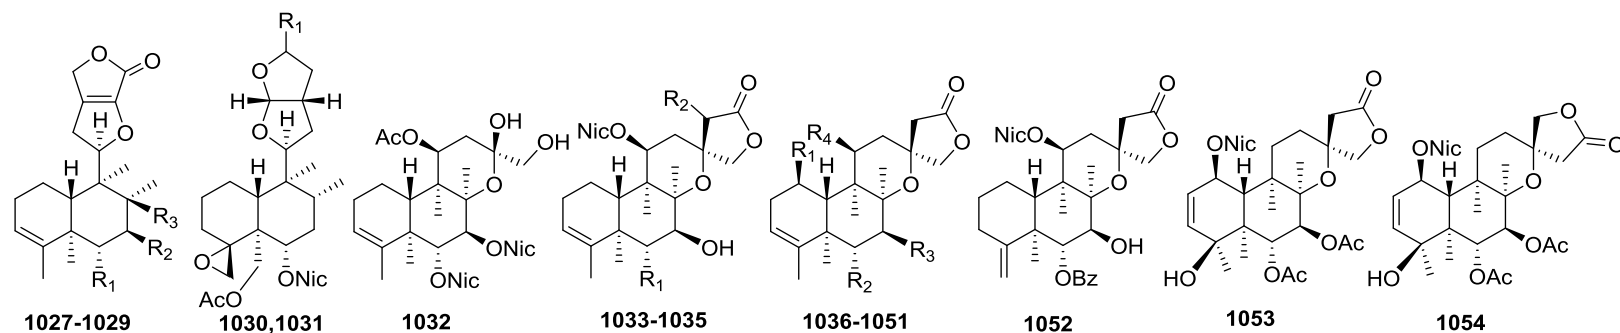

| No.  | Compound Name                                             | R <sub>1</sub> | R <sub>2</sub>                  | R <sub>3</sub>  | R <sub>4</sub> | R <sub>5</sub> | Source                                             | Ref.                                                    |
|------|-----------------------------------------------------------|----------------|---------------------------------|-----------------|----------------|----------------|----------------------------------------------------|---------------------------------------------------------|
| 982  | cleroda-3,13(14) <i>E</i> -diene-15,16-diamide            | —              | —                               | —               | —              | —              | <i>Polyalthia longifolia</i>                       | <i>Phytochem. Lett.</i> , 2015, <b>11</b> , 28-31       |
| 983  | cleroda-3-ene-15,16-diamide                               | —              | —                               | —               | —              | —              |                                                    |                                                         |
| 984  | agelasine K                                               | —              | —                               | —               | —              | —              | <i>Agelas cf. mauritiana</i>                       | <i>J. Nat. Prod.</i> , 2008, <b>71</b> , 1451–1454      |
| 985  | agelasine L                                               | —              | —                               | —               | —              | —              |                                                    |                                                         |
| 986  | axistatin 2                                               | —              | —                               | —               | —              | —              | <i>Agelas axifera</i>                              | <i>J. Nat. Prod.</i> , 2013, <b>76</b> , 420-424        |
| 987  | axistatin 1                                               | H              | Me                              | αMe             | βMe            | Z <sub>8</sub> |                                                    |                                                         |
| 988  | agelasine P                                               | =O             | CH <sub>2</sub> OZ <sub>5</sub> | αMe             | βMe            | Z <sub>6</sub> | <i>Agelas sp.</i>                                  | <i>Tetrahedron</i> , 2012, <b>68</b> , 9738-9744        |
| 989  | agelasine Q                                               | H              | CH <sub>2</sub> OZ <sub>5</sub> | αMe             | αMe            | Z <sub>6</sub> |                                                    |                                                         |
| 990  | agelasine R                                               | H              | CH <sub>2</sub> OZ <sub>5</sub> | βMe             | βMe            | Z <sub>6</sub> |                                                    |                                                         |
| 991  | agelasine U                                               | Z <sub>6</sub> | —                               | —               | —              | —              |                                                    |                                                         |
| 992  | scutebarbatine Z                                          | ONic           | OH                              | H               | H              | H              | <i>Scutellaria barbata</i>                         | <i>Chem. Pharm. Bull.</i> , 2010, <b>58</b> , 1267-1270 |
| 993  | scutebarbatine X                                          | ONic           | ONic                            | OH              | OAc            | OH             |                                                    |                                                         |
| 994  | scutebata B                                               | ONic           | OBz                             | OH              | OAc            | OH             |                                                    |                                                         |
| 995  | scutebata C                                               | ONic           | OH                              | OH              | OAc            | OH             |                                                    |                                                         |
| 996  | barbatellarine B                                          | ONic           | OBz                             | OH              | OAc            | H              |                                                    |                                                         |
| 997  | scutebarbatine Y                                          | H              | αOBz                            | βONic           | βOH            | —              |                                                    |                                                         |
| 998  | scutehenanine A                                           | H              | αOH                             | βONic           | βOH            | —              |                                                    |                                                         |
| 999  | 6- <i>O</i> -acetylscutehenanine A                        | H              | αOAc                            | βONic           | βOH            | —              |                                                    |                                                         |
| 1000 | 6- <i>O</i> -(2-carbonyl-3-methylbutanoyl)scutehenanine A | H              | αOM <sub>1</sub>                | βONic           | βOH            | —              |                                                    |                                                         |
| 1001 | scutebarbatine B                                          | H              | αONic                           | βOBz            | βOH            | —              |                                                    |                                                         |
| 1002 | scutelinquanine C                                         | H              | αONic                           | βY <sub>8</sub> | βOH            | —              | <i>Phytochem. Lett.</i> , 2010, <b>3</b> , 190-193 |                                                         |



|                   |                                      |                   |                |                        |              |   |                                 |                                                             |                                                    |
|-------------------|--------------------------------------|-------------------|----------------|------------------------|--------------|---|---------------------------------|-------------------------------------------------------------|----------------------------------------------------|
| 1003              | scutebarbatine A                     | H                 | $\alpha$ ONic  | $\beta$ ONic           | $\beta$ OH   | — |                                 | <i>Chin. Chem. Lett.</i> , 1996, <b>7</b> , 333-334         |                                                    |
| 1004              | scutebarbatine K                     | H                 | $\alpha$ ONic  | $\beta$ OAc            | $\beta$ OH   | — |                                 | <i>Chem. Pharm. Bull.</i> , 2008, <b>56</b> , 207-209       |                                                    |
| 1005              | scutebarbatine L                     | H                 | $\alpha$ ONic  | $\beta$ Y <sub>4</sub> | $\beta$ OH   | — |                                 | <i>Planta Med.</i> , 2007, <b>73</b> , 1217-1220            |                                                    |
| 1006              | 2-carbonylscutebarbatine A           | =O                | $\alpha$ ONic  | $\beta$ ONic           | $\beta$ OH   | — |                                 |                                                             |                                                    |
| 1007              | 6-O-nicotinoylbarbatin A             | H                 | $\alpha$ ONic  | $\beta$ OH             | $\beta$ OH   | — |                                 |                                                             |                                                    |
| 1008              | 8-O-nicotinoylbarbatin A             | H                 | $\alpha$ OH    | $\beta$ OH             | $\beta$ ONic | — |                                 | <i>Chem. Pharm. Bull.</i> , 2006, <b>54</b> , 869-872       |                                                    |
| 1009              | scutebarbatine C                     | —                 | —              | —                      | —            | — |                                 |                                                             |                                                    |
| 1010              | scutebarbatine D                     | $\beta$ OH        | $\alpha$ ONic  | $\beta$ OBz            | —            | — |                                 |                                                             |                                                    |
| 1011              | scutebarbatine E                     | =O                | $\alpha$ ONic  | $\beta$ OBz            | —            | — |                                 | <i>J. Asian Nat. Prod. Res.</i> , 2009, <b>11</b> , 451-456 |                                                    |
| 1012              | scutebarbatine O                     | $\alpha$ OH       | $\beta$ ONic   | $\alpha$ ONic          | —            | — |                                 |                                                             |                                                    |
| 1013              | cleroda-3-ene yrrolidine-15,16-dione | —                 | —              | —                      | —            | — |                                 | <i>Polyalthia longifolia</i>                                | <i>Phytochem. Lett.</i> , 2015, <b>11</b> , 28-31  |
| 1014              | cleroda-3-ene yrrrole-15,16-dione    | Me                | =O             | =O                     |              |   |                                 |                                                             |                                                    |
| 1015              | echinophyllin C                      | CO <sub>2</sub> H | H <sub>2</sub> | O                      | —            | — | <i>Echinodorus macrophyllus</i> | <i>J. Nat. Prod.</i> , 2000, <b>63</b> , 1576-1579          |                                                    |
| 1016              | echinophyllin F                      | CO <sub>2</sub> H | O              | H <sub>2</sub>         | —            | — |                                 |                                                             |                                                    |
| 1017              | echinophyllin D                      | O                 | H <sub>2</sub> | —                      | —            | — |                                 |                                                             |                                                    |
| 1018              | 15-oxo-echinophyllin A               | O                 | O              | —                      | —            | — | <i>Casearia sylvestris</i>      | <i>Fitoterapia</i> , 2009, <b>80</b> , 404-407              |                                                    |
| 1019              | echinophyllin A                      | H <sub>2</sub>    | O              | —                      | —            | — | <i>Echinodorus macrophyllus</i> | <i>Tetrahedron Lett.</i> , 2000, <b>41</b> , 2939-2943      |                                                    |
| 1020              | echinophyllin B                      | H <sub>2</sub>    | O              | —                      | —            | — |                                 |                                                             |                                                    |
| 1021              | echinophyllin E                      | O                 | H <sub>2</sub> | —                      | —            | — |                                 |                                                             | <i>J. Nat. Prod.</i> , 2000, <b>63</b> , 1576-1579 |
| 1022              | cleidbrevoid A                       | $\beta$ T         | —              | —                      | —            | — | <i>Cleidion brevipetiolatum</i> | <i>Fitoterapia</i> , 2012, <b>83</b> , 1100-1104            |                                                    |
| 1023              | cleidbrevoid B                       | $\alpha$ T        | —              | —                      | —            | — |                                 |                                                             |                                                    |
| 1024              | cleidbrevoid C                       | $\beta$ T         | —              | —                      | —            | — |                                 |                                                             |                                                    |
| 1025 <sup>a</sup> | teupernin D                          | —                 | —              | —                      | —            | — | <i>Teucrium pernyi</i>          | <i>Chem. Pharm. Bull.</i> , 1992, <b>40</b> , 2193-2195     |                                                    |
| 1026              | teuracemin                           | —                 | —              | —                      | —            | — | <i>Teucrium racemosum</i>       | <i>Phytochemistry</i> , 1995, <b>40</b> , 505-507           |                                                    |
| 1027              | scutehenanine D                      | OBz               | ONic           | OH                     | —            | — | <i>Scutellaria barbata</i>      | <i>J. Nat. Prod.</i> , 2009, <b>72</b> , 1793-1797          |                                                    |
| 1028              | scutebarbatine H                     | ONic              | OH             | OH                     | —            | — |                                 | <i>Chem. Pharm. Bull.</i> , 2007, <b>55</b> , 1218-1221     |                                                    |
| 1029              | 7-O-nicotinoylscutebarbatine H       | ONic              | ONic           | OH                     | —            | — |                                 | <i>Chem. Pharm. Bull.</i> , 2008, <b>56</b> , 207-209       |                                                    |
| 1030              | scutebarbatine I                     | $\beta$ OEt       | —              | —                      | —            | — |                                 |                                                             |                                                    |
| 1031              | scutebarbatine J                     | $\alpha$ OEt      | —              | —                      | —            | — |                                 | <i>Phytochem. Lett.</i> , 2010, <b>3</b> , 190-193          |                                                    |
| 1032              | scutelinquanine B                    | —                 | —              | —                      | —            | — |                                 |                                                             |                                                    |
| 1033              | scutelinquanine A                    | OAc               | H              | —                      | —            | — |                                 | <i>Fitoterapia</i> , 2010, <b>81</b> , 737-741              |                                                    |
| 1034              | scutehenanine H                      | OBz               | OH             | —                      | —            | — |                                 |                                                             |                                                    |
| 1035              | scutelinquanine D                    | OH                | OH             | —                      | —            | — |                                 | <i>J. Asian Nat. Prod. Res.</i> , 2010, <b>12</b> , 859-864 |                                                    |

|      |                                                                                   |      |      |      |      |   |  |                                                             |
|------|-----------------------------------------------------------------------------------|------|------|------|------|---|--|-------------------------------------------------------------|
| 1036 | scutehenanine B* → scutebarbatine W (1047)                                        | H    | OBz  | OH   | ONic |   |  | <i>J. Nat. Prod.</i> , 2009, <b>72</b> , 1793-1797          |
| 1037 | scutebarbatine F* → scutebata F (1045) = barbatine C (1048)                       | H    | ONic | OAc  | OAc  |   |  | <i>Chem. Pharm. Bull.</i> , 2006, <b>54</b> , 869-872       |
| 1038 | scutebarbatine G* → 1039                                                          | H    | OH   | OH   | ONic |   |  |                                                             |
| 1039 | —                                                                                 | ONic | OH   | OH   | H    |   |  |                                                             |
| 1040 | 6,7-di- <i>O</i> -nicotinoylscutebarbatine G* → 1041                              | H    | ONic | ONic | ONic |   |  | <i>Chem. Pharm. Bull.</i> , 2007, <b>55</b> , 1218-1221     |
| 1041 |                                                                                   | ONic | ONic | ONic | H    |   |  |                                                             |
| 1042 | 6- <i>O</i> -nicotinoyl-7- <i>O</i> -acetylscutebarbatine G* → barbatine D (1049) | H    | ONic | OAc  | ONic |   |  |                                                             |
| 1043 | 6- <i>O</i> -nicotinoylscutebarbatine G* → 1044                                   | H    | ONic | OH   | ONic |   |  | <i>J. Asian Nat. Prod. Res.</i> , 2009, <b>11</b> , 451-456 |
| 1044 |                                                                                   | ONic | ONic | OH   | H    | — |  |                                                             |
| 1045 | scutebata F = barbatine C (1048)                                                  | ONic | OAc  | OAc  | H    | — |  | <i>J. Nat. Prod.</i> , 2010, <b>73</b> , 233-236            |
| 1046 | scutebata G                                                                       | OBz  | ONic | OBz  | H    | — |  |                                                             |
| 1047 | scutebarbatine W                                                                  | OBz  | ONic | OH   | H    | — |  | <i>Chem. Pharm. Bull.</i> , 2010, <b>58</b> , 1267-1270     |
| 1048 | barbatine C= scutebata F (1045)                                                   | ONic | OAc  | OAc  | H    | — |  |                                                             |
| 1049 | barbatine D                                                                       | ONic | ONic | OAc  | H    | — |  | <i>Eur. J. Org. Chem.</i> , 2009, 5810-5815                 |
| 1050 | barbatine A                                                                       | H    | ONic | OAc  | ONic | — |  |                                                             |
| 1051 | barbatine B                                                                       | H    | ONic | ONic | ONic | — |  |                                                             |
| 1052 | scutehenanine C                                                                   |      |      |      |      |   |  | <i>J. Nat. Prod.</i> , 2009, <b>72</b> , 1793-1797          |
| 1053 | barbatellarine C                                                                  |      |      |      |      |   |  |                                                             |
| 1054 | barbatellarine D                                                                  |      |      |      |      |   |  | <i>Helv. Chim. Acta.</i> , 2011, <b>94</b> , 643-649        |

<sup>a</sup> Compound **776** in Table 24 was also given the name ‘teupernin D’.

\*Original references for isolations listed in table; however, structure revisions (denoted by “→ revised compound name or number”) were described in *Chem. Pharm. Bull.*, 2010, **58**, 1267-1270.

## 9.2. Degraded Derivatives (Table 30)

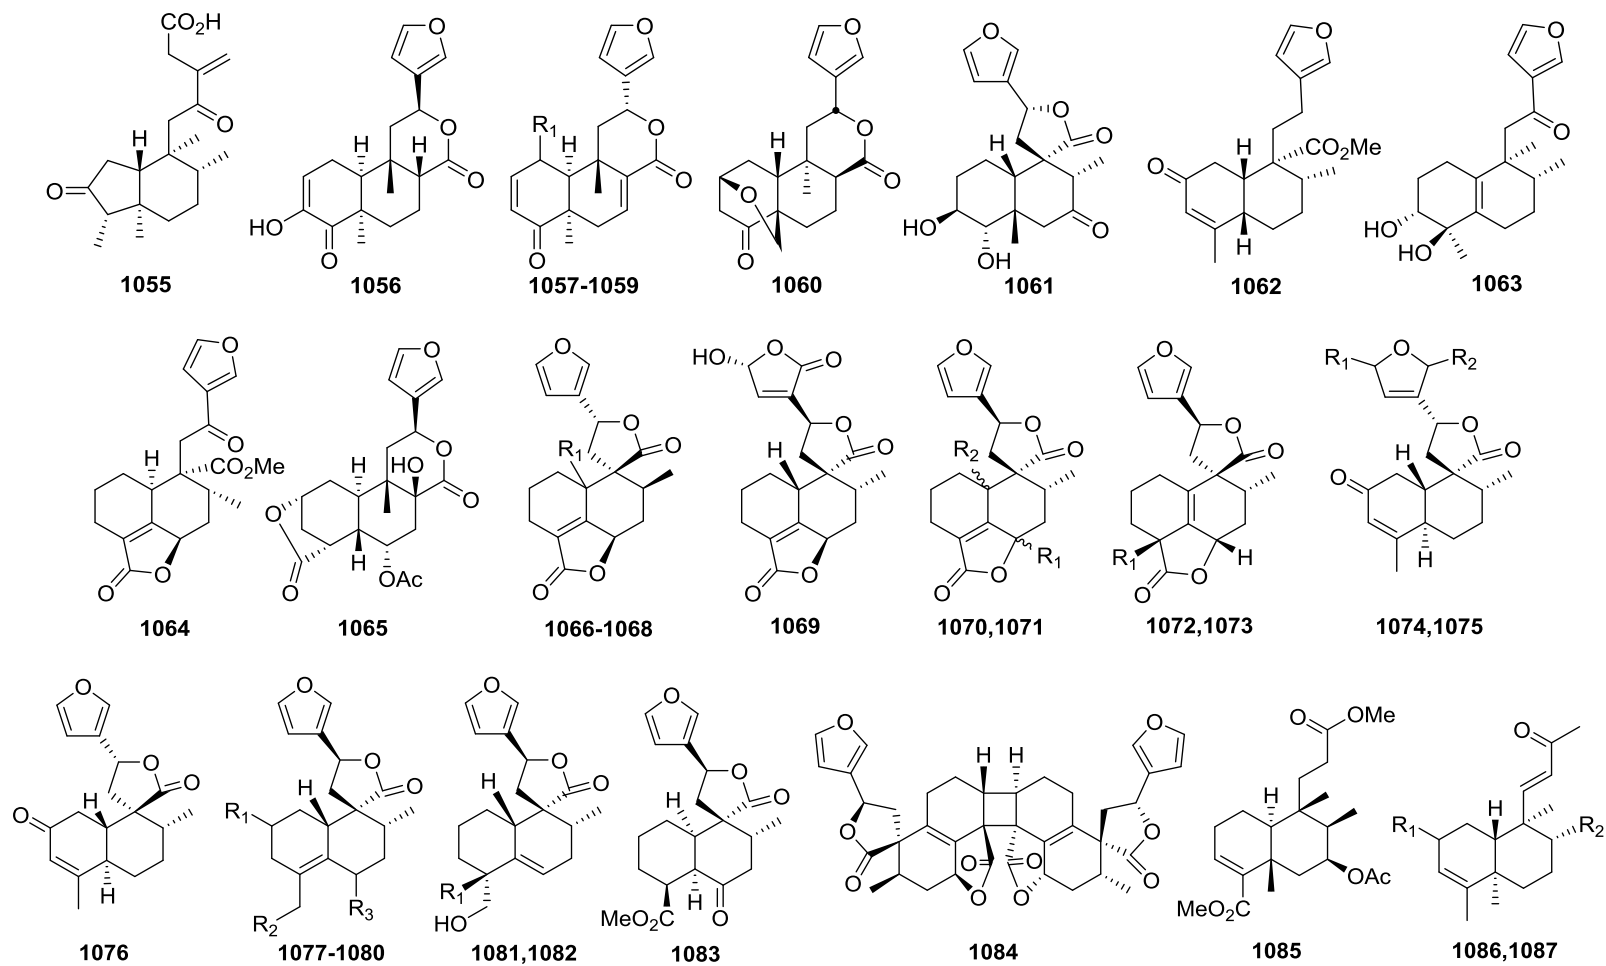

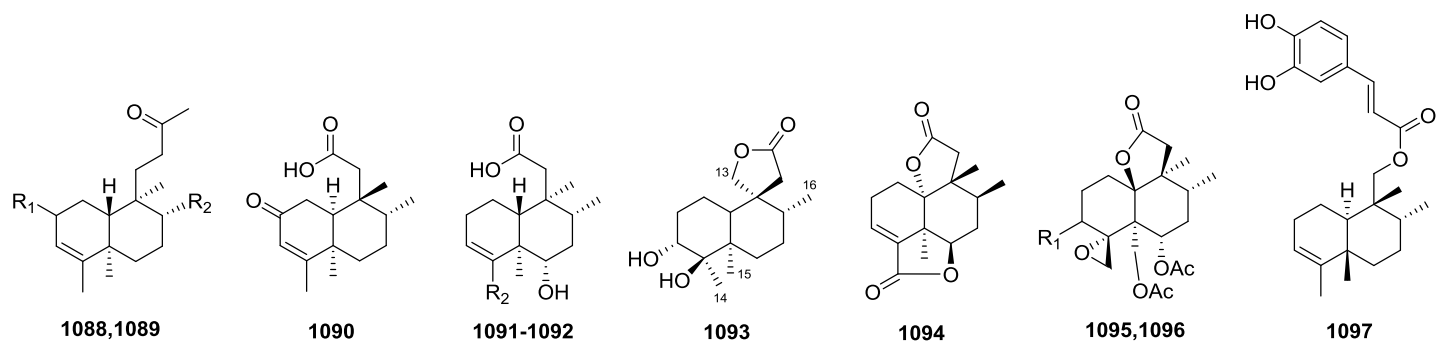

| No.  | Compound Name                                                                      | R <sub>1</sub>      | R <sub>2</sub> | R <sub>3</sub> | R <sub>4</sub> | Source                                           | Ref.                                                          |
|------|------------------------------------------------------------------------------------|---------------------|----------------|----------------|----------------|--------------------------------------------------|---------------------------------------------------------------|
| 1055 | pentandranic acid B                                                                | —                   | —              | —              | —              | <i>Callicarpa pentandra</i>                      | <i>J. Nat. Prod.</i> , 2000, <b>63</b> , 1062-1065            |
| 1056 | sagitone                                                                           | —                   | —              | —              | —              | <i>Tinosporasagittata</i> var. <i>yunnanensi</i> | <i>Molecules</i> , 2010, <b>15</b> , 8360-8365                |
| 1057 | fiaruretin D                                                                       | H                   | —              | —              | —              | <i>Fibraurea tinctoria</i>                       | <i>Bioorg. Med. Chem.</i> , 2008, <b>16</b> , 9603-9609       |
| 1058 | fiaruretin E                                                                       | αOH                 | —              | —              | —              |                                                  |                                                               |
| 1059 | fiaruretin F                                                                       | =O                  | —              | —              | —              |                                                  |                                                               |
| 1060 | peniankerine                                                                       | —                   | —              | —              | —              | <i>Penianthus zenkeri</i>                        | <i>Phytochemistry</i> , 1997, <b>46</b> , 165-167             |
| 1061 | —                                                                                  | —                   | —              | —              | —              | <i>Nardophyllum lanatum</i>                      | <i>Phytochemistry</i> , 1990, <b>29</b> , 1227-1230           |
| 1062 | cajucarin B                                                                        | —                   | —              | —              | —              | <i>Croton cajucara</i>                           | <i>Chem. Pharm. Bull.</i> , 1990, <b>38</b> , 701-705         |
| 1063 | 3α,4β-dihydroxy-15,16-epoxy-19-nor-12-oxo-cleroda-5(10),13(16),14-triene           | —                   | —              | —              | —              | <i>Croton hovarum</i>                            | <i>Phytochemistry</i> , 1997, <b>45</b> , 379-381             |
| 1064 | crotoeurin C                                                                       | CO <sub>2</sub> Me  | —              | —              | —              | <i>Croton euryphyllus</i>                        | <i>Bioorg. Med. Chem. Lett.</i> , 2015, <b>25</b> , 1329-1332 |
| 1065 | 15,16-epoxy-6a-O-acetyl-8β-hydroxy-19-nor-clero-13(16),14-diene-17,12;18,2-diolide | —                   | —              | —              | —              | <i>Dioscorea bulbifera</i>                       | <i>Nat. Prod. Commun.</i> , 2011, <b>6</b> , 1069-1072        |
| 1066 | jatrophoidin                                                                       | αCO <sub>2</sub> Me | —              | —              | —              | <i>Croton jatrophoides</i>                       | <i>Planta Med.</i> , 2009, <b>75</b> , 262-267                |
| 1067 | isoteucvin                                                                         | βH                  | —              | —              | —              |                                                  |                                                               |
| 1068 | crassifolin G                                                                      | αOH                 | —              | —              | —              | <i>Croton crassifolius</i>                       | <i>J. Nat. Prod.</i> , 2012, <b>75</b> , 2188-2192            |
| 1069 | teuponin                                                                           | —                   | —              | —              | —              | <i>Teucrium japonicum</i>                        | <i>Phytochemistry</i> , 1991, <b>30</b> , 4175-4177           |
| 1070 | teucvisin C                                                                        | βOH                 | βH             |                |                | <i>Teucrium viscidum</i>                         | <i>Chem. Pharm. Bull.</i> , 2014, <b>62</b> , 472-476         |
| 1071 | teucvisin D                                                                        | αH                  | αOH            |                |                |                                                  |                                                               |
| 1072 | teucvisin E                                                                        | OH                  | —              | —              | —              |                                                  |                                                               |

|      |                                                                          |              |                    |             |   |                                                       |                                                                  |
|------|--------------------------------------------------------------------------|--------------|--------------------|-------------|---|-------------------------------------------------------|------------------------------------------------------------------|
| 1073 | crassifolin H                                                            | H            | —                  | —           | — | <i>Croton crassifolius</i>                            | <i>Heterocycles</i> , 2014, <b>89</b> , 1585-1593                |
| 1074 | cajucarinolide                                                           | OH           | =O                 | —           | — | <i>Croton cajucara</i>                                | <i>Planta Med.</i> , 1992, <b>58</b> , 549-551                   |
| 1075 | isocajucarinolide                                                        | =O           | OH                 | —           | — |                                                       |                                                                  |
| 1076 | <i>trans</i> -dehydrocrotonin                                            | —            | —                  | —           | — | <i>Croton cajucara</i>                                | <i>J. Braz. Chem. Soc.</i> , 2014, <b>25</b> , 629-638           |
| 1077 | teucorymbin                                                              | H            | OAc                | H           | — | <i>Teucrium corymbosum</i>                            | <i>Phytochemistry</i> , 1995, <b>40</b> , 1481-1483              |
| 1078 | syspirensin A                                                            | $\alpha$ OH  | OH                 | $\alpha$ OH | — | <i>Teucrium chamaedrys</i> ssp.<br><i>syspirensis</i> | <i>J. Nat. Prod.</i> , 1996, <b>59</b> , 457-460                 |
| 1079 | teupolin IX                                                              | H            | OH                 | $\beta$ OMe | — | <i>Teucrium polium</i>                                | <i>Phytochemistry</i> , 2011, <b>72</b> , 2037-2044              |
| 1080 | 12-epi-montanin B                                                        | H            | OH                 | $\beta$ OH  | — | <i>Teucrium maghrebinum</i>                           | <i>J. Nat. Prod.</i> , 2000, <b>63</b> , 1029-1031               |
| 1081 | teupolin VIII                                                            | OH           | —                  | —           | — | <i>Teucrium polium</i>                                | <i>Phytochemistry</i> , 2011, <b>72</b> , 2037-2044              |
| 1082 | teupolin VII                                                             | OMe          | —                  | —           | — |                                                       |                                                                  |
| 1083 | crotoeurin B                                                             | —            | —                  | —           | — | <i>Croton euryphyllus</i>                             | <i>Bioorg. Med. Chem. Lett.</i> , 2015, <b>25</b> ,<br>1329-1332 |
| 1084 | crotoeurin A                                                             | —            | —                  | —           | — |                                                       |                                                                  |
| 1085 | (+)-7 $\beta$ -acetoxy-14,15,16-trinor-3-clerodene-13,18-dioate          | —            | —                  | —           | — | <i>Sindora sumatrana</i>                              | <i>Chem. Pharm. Bull.</i> , 1994, <b>42</b> ,<br>1202-1207       |
| 1086 | 2-oxo-14,15-bisnor-3,11 <i>E</i> -kolavadien-13-one                      | =O           | Me                 | —           | — | <i>Polyalthia simiarum</i>                            | <i>Nat. Prod. Commun.</i> , 2010, <b>5</b> ,<br>1543-1546        |
| 1087 | 14,15-bisnor-3,11 <i>E</i> -kolavadien-13-one                            | H            | Me                 | —           | — | <i>Polyalthia viridis</i>                             | <i>Phytochemistry</i> , 1990, <b>29</b> , 653-655                |
| 1088 | 14,15-dinorclerod-3-ene-2,13-didione                                     | =O           | Me                 | —           | — | <i>Clausena dunniana</i>                              | <i>Helv. Chim. Acta.</i> , 2003, <b>86</b> , 3187-3193           |
| 1089 | bis-norinfuscaic acid                                                    | H            | CO <sub>2</sub> H  | —           | — | <i>Jungermannia infusca</i>                           | <i>Phytochemistry</i> , 1998, <b>49</b> , 601-608                |
| 1090 | 2-oxo-5 $\alpha$ ,8 $\beta$ -13,14,15,16-tetranorclerod-3-en-12-oic acid | —            | —                  | —           | — | <i>Vellozia bicolor</i>                               | <i>Phytochemistry</i> , 1994, <b>37</b> , 1115-1117              |
| 1091 | 18-hydroxyaylthonic acid                                                 | —            | CH <sub>2</sub> OH | —           | — | <i>Dicranopteris dichotoma</i>                        | <i>J. Nat. Prod.</i> , 2007, <b>70</b> , 265-268                 |
| 1092 | 18-oxo-aylthonic acid                                                    | —            | CHO                | —           | — |                                                       |                                                                  |
| 1093 | crotinsulactone                                                          | —            | —                  | —           | — | <i>Croton insularis</i>                               | <i>Helv. Chim. Acta.</i> , 2005, <b>88</b> , 2654-2660           |
| 1094 | ciliatolide A                                                            | —            | —                  | —           | — | <i>Scapania ciliata</i>                               | <i>Chem. Biodivers.</i> , 2013, <b>10</b> , 1606-1612            |
| 1095 | teucrolin D                                                              | $\alpha$ OAc | —                  | —           | — | <i>Teucrium oliverianum</i>                           | <i>J. Nat. Prod.</i> , 1993, <b>56</b> , 830-842                 |
| 1096 | teucrolivin F                                                            | =O           | —                  | —           | — |                                                       | <i>Phytochemistry</i> , 1991, <b>30</b> , 1603-1606              |
| 1097 | —                                                                        | —            | —                  | —           | — | <i>Jamesoniella colorata</i>                          | <i>Nat. Prod. Commun.</i> , 2010, <b>5</b> , 999-1003            |

### 9.3 Ring-*seco* Derivatives (Table 31)

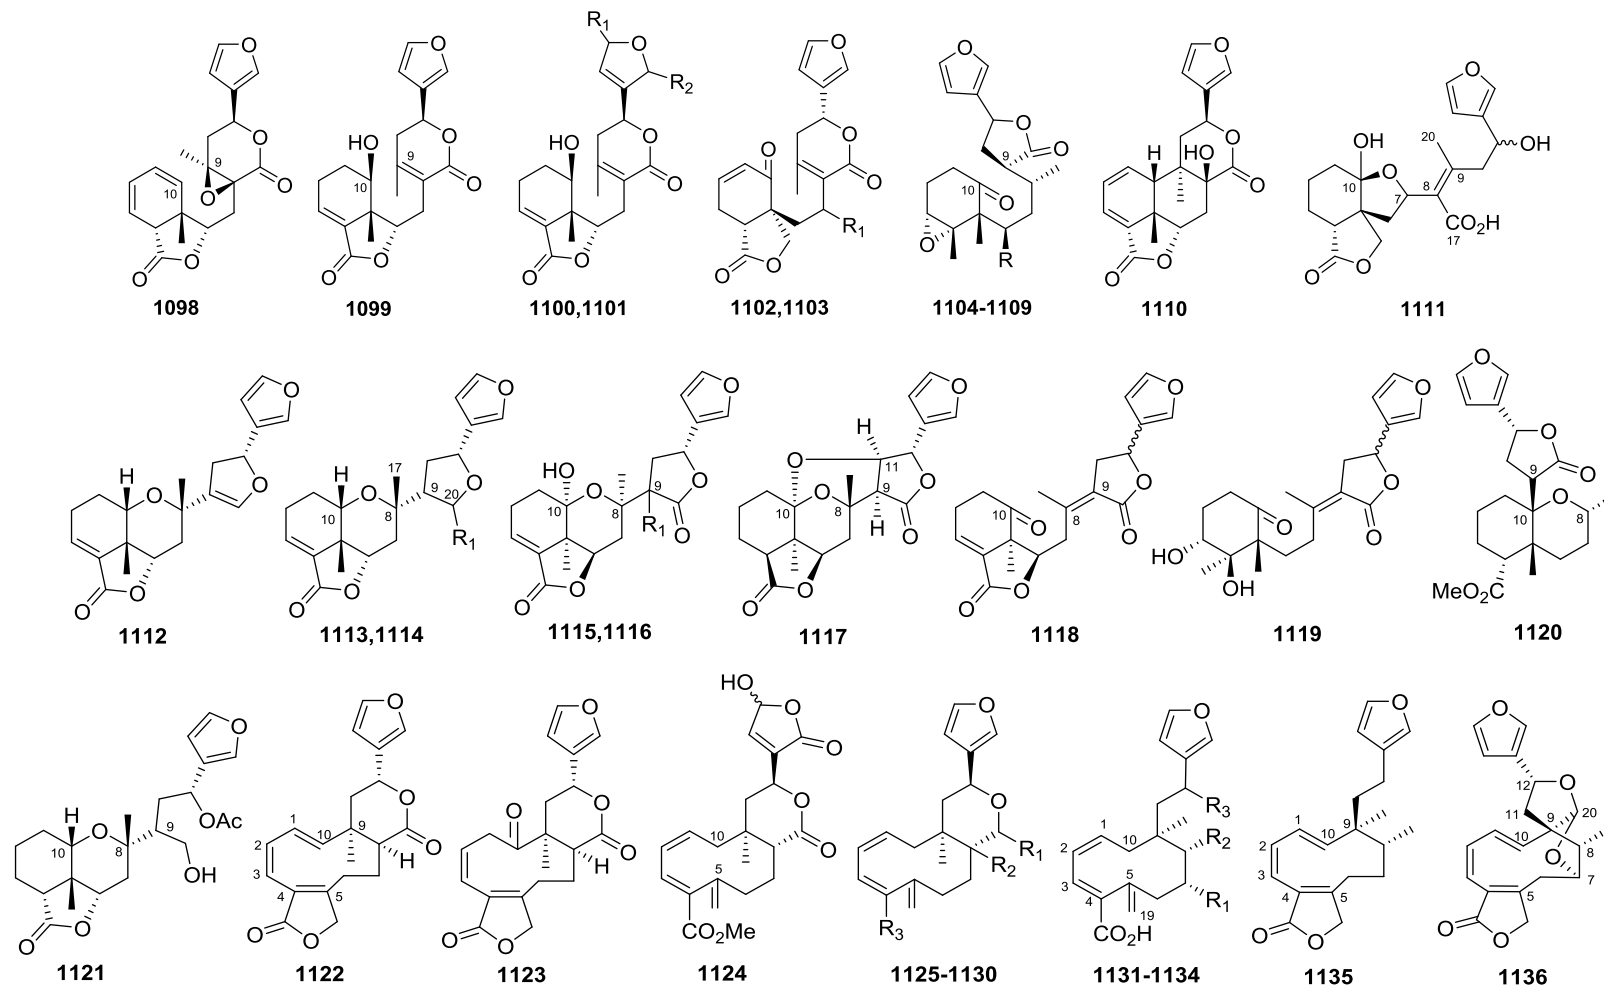

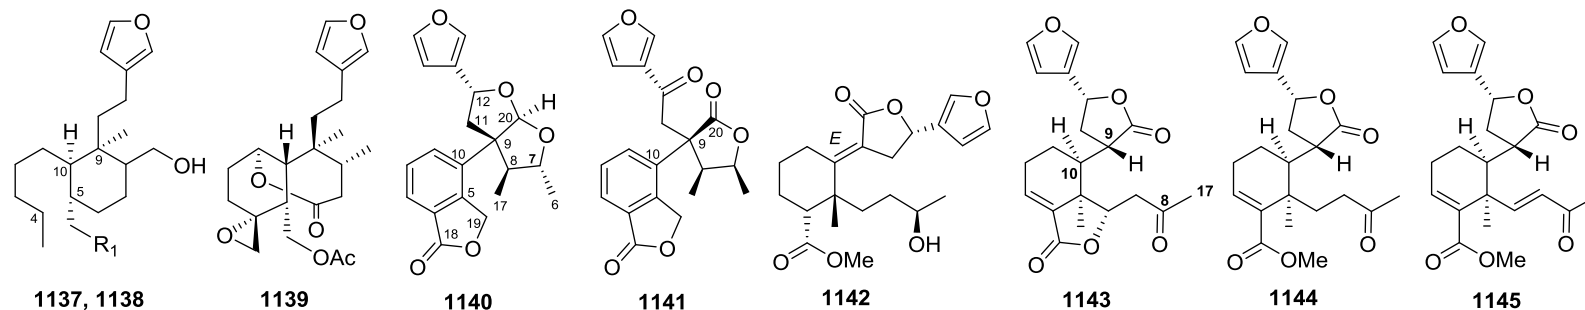

| No.  | Compound Name                                                          | R <sub>1</sub> | R <sub>2</sub> | R <sub>3</sub> | Source                         | Ref.                                                                                                    |
|------|------------------------------------------------------------------------|----------------|----------------|----------------|--------------------------------|---------------------------------------------------------------------------------------------------------|
| 1098 | jamesoniellide F                                                       | —              | —              | —              | <i>Jamesoniella autumnalis</i> | <i>Phytochemistry</i> , 1995, <b>39</b> , 859-868,                                                      |
| 1099 | jamesoniellide I                                                       | —              | —              | —              |                                | <i>Phytochemistry</i> , 1999, <b>51</b> , 743-750                                                       |
| 1100 | jamesoniellide K                                                       | OH             | =O             | —              | <i>Jamesoniella colorata</i>   | <i>Phytochemistry</i> , 2003, <b>63</b> , 227-233                                                       |
| 1101 | jamesoniellide L                                                       | =O             | OH             | —              |                                |                                                                                                         |
| 1102 | salvianduline A                                                        | αOAc           | —              | —              | <i>Salvia lavanduloides</i>    | <i>Phytochemistry</i> , 1991, <b>30</b> , 3357-3360                                                     |
| 1103 | salvianduline B                                                        | βOH            | —              | —              |                                |                                                                                                         |
| 1104 | pyrrhopappolide                                                        | H              | —              | —              | <i>Microglossa pyrrhopappa</i> | <i>Phytochemistry</i> , 1990, <b>29</b> , 3233-3241                                                     |
| 1105 | 6β-hydroxypyrrhopappolide                                              | OH             | —              | —              |                                |                                                                                                         |
| 1106 | 6β-angeloyloxypyrrhopappolide                                          | OAng           | —              | —              |                                |                                                                                                         |
| 1107 | 6β-seneciolyloxypyrrhopappolide                                        | OSen           | —              | —              |                                |                                                                                                         |
| 1108 | 6β-tigloyloxypyrrhopappolide                                           | OTig           | —              | —              |                                |                                                                                                         |
| 1109 | 6β-[2-methylbutyryloxy]pyrrhopappolide                                 | OMeBu          | —              | —              |                                |                                                                                                         |
| 1110 | 15,16-epoxy-8-hydroxy-1,3,13(16),14-clerodatetraene-17,12:18,6-diolide | —              | —              | —              | <i>Jamesoniella autumnalis</i> | <i>Phytochemistry</i> , 1995, <b>39</b> , 859-868                                                       |
| 1111 | —                                                                      | —              | —              | —              | <i>Salvia miniata</i>          | <i>Phytochemistry</i> , 2011, <b>72</b> , 265-275                                                       |
| 1112 | jamesoniellide D                                                       | H              | H              | —              | <i>Jamesoniella autumnalis</i> | <i>Phytochemistry</i> , 1995, <b>39</b> , 859-868,<br><i>Phytochemistry</i> , 1999, <b>51</b> , 743-750 |
| 1113 | jamesoniellide E                                                       | =O             | —              | —              |                                |                                                                                                         |
| 1114 | jamesoniellide H                                                       | αOH            | —              | —              |                                |                                                                                                         |
| 1115 | cephaloziellin H                                                       | αH             | —              | —              | <i>Cephaloziella kiaeri</i>    | <i>J. Nat. Prod.</i> , 2013, <b>76</b> , 1700-1708                                                      |
| 1116 | cephaloziellin I                                                       | βH             | —              | —              |                                |                                                                                                         |
| 1117 | cephaloziellin J                                                       | —              | —              | —              |                                |                                                                                                         |
| 1118 | cephaloziellin K                                                       | —              | —              | —              |                                |                                                                                                         |
| 1119 | seco-eeoniolide                                                        | —              | —              | —              | <i>Pteronia incana</i>         | <i>Phytochemistry</i> , 1990, <b>29</b> , 1231-1245                                                     |
| 1120 | jamesoniellide A                                                       | —              | —              | —              | <i>Jamesoniella autumnalis</i> | <i>J. Nat. Prod.</i> , 1992, <b>55</b> , 111-121                                                        |

|      |                                                        |              |                   |                    |                         |                                                       |
|------|--------------------------------------------------------|--------------|-------------------|--------------------|-------------------------|-------------------------------------------------------|
| 1121 | jamesoniellide B                                       | —            | —                 | —                  |                         |                                                       |
| 1122 | salvimicrophyllin A                                    | —            | —                 | —                  | Salvia microphylla      | J. Nat. Prod., 2014, <b>77</b> , 1088-1092            |
| 1123 | salvimicrophyllin B                                    | —            | —                 | —                  |                         |                                                       |
| 1124 | seco-hypoleucolide                                     | —            | —                 | —                  | Conyza hypoleuca        | Phytochemistry 1991, <b>30</b> , 575-581              |
| 1125 | 17 $\alpha$ -hydroxy-12 $\beta$ ,17-epoxystriatic acid | $\alpha$ OH  | $\beta$ H         | CO <sub>2</sub> H  | Conyza welwitschii      | Phytochemistry, 1990, <b>29</b> , 2247-2252           |
| 1126 | 17 $\beta$ -hydroxy-12 $\beta$ ,17-epoxystriatic acid  | $\beta$ OH   | $\beta$ H         | CO <sub>2</sub> H  |                         |                                                       |
| 1127 | 17 $\alpha$ -O-methyl ether of 1125                    | $\alpha$ OMe | $\beta$ H         | CO <sub>2</sub> H  |                         |                                                       |
| 1128 | 17 $\beta$ -O-methyl ether of 1126                     | $\beta$ OMe  | $\beta$ H         | CO <sub>2</sub> H  |                         |                                                       |
| 1129 | strictic acid 12 $\beta$ ,17-olide                     | =O           | $\beta$ H         | CO <sub>2</sub> H  |                         |                                                       |
| 1130 | —                                                      | =O           | H                 | CO <sub>2</sub> Me | Croton jimenezii        | Ingenieria Y Ciencia Quimica, 2000, <b>19</b> , 68-73 |
| 1131 | 7 $\alpha$ -hydroxystriatic acid                       | OH           | Me                | H                  | Conyza hypoleuca        | Phytochemistry 1991, <b>30</b> , 575-581              |
| 1132 | 11,12E-dehydrostrictic acid                            | H            | Me                | H                  |                         |                                                       |
| 1133 | 12-hydroxystriatic acid                                | H            | Me                | $\beta$ OH         | Conyza welwitschii      | Phytochemistry, 1990, <b>29</b> , 2247-2252           |
| 1134 | 12-oxo-17-oic-strictic diacid                          | H            | CO <sub>2</sub> H | =O                 |                         |                                                       |
| 1135 | dodonolide                                             | —            | —                 | —                  | Dodonaea viscosa.       | Tetrahedron, 2001, <b>57</b> , 2981-2989              |
| 1136 | tonalensin                                             | —            | —                 | —                  | Salvia tonalensis       | J. Chem. Crystallogr., 1996, <b>26</b> , 239-242      |
| 1137 | tinosporafuranol                                       | H            | —                 | —                  | Tinospora cordifolias   | Nat. Prod. Res., 2010, <b>24</b> , 926-9354           |
| 1138 | tinosporafurandiol                                     | OH           | —                 | —                  |                         |                                                       |
| 1139 | fruticolide                                            | —            | —                 | —                  | Teucrium fruticans      | Phytochemistry, 1992, <b>31</b> , 3531-3534           |
| 1140 | rhyacophiline                                          | —            | —                 | —                  | Salvia rhyacophila      | Tetrahedron, 1991, <b>47</b> , 7199-7208              |
| 1141 | salvireptanolide                                       | —            | —                 | —                  | Salvia reptans          | Phytochemistry, 1991, <b>30</b> , 2335-2338           |
| 1142 | jamesoniellide J                                       | —            | —                 | —                  | Jamesoniella autumnalis | Phytochemistry, 1999, <b>51</b> , 743-750             |
| 1143 | cephaloziellin E                                       | —            | —                 | —                  | Cephaloziella kiaeri    | J. Nat. Prod., 2013, <b>76</b> , 1700-1708            |
| 1144 | cephaloziellin F                                       | —            | —                 | —                  |                         |                                                       |
| 1145 | cephaloziellin G                                       | —            | —                 | —                  |                         |                                                       |



### 9.4. Rearranged Derivatives (Table 32)

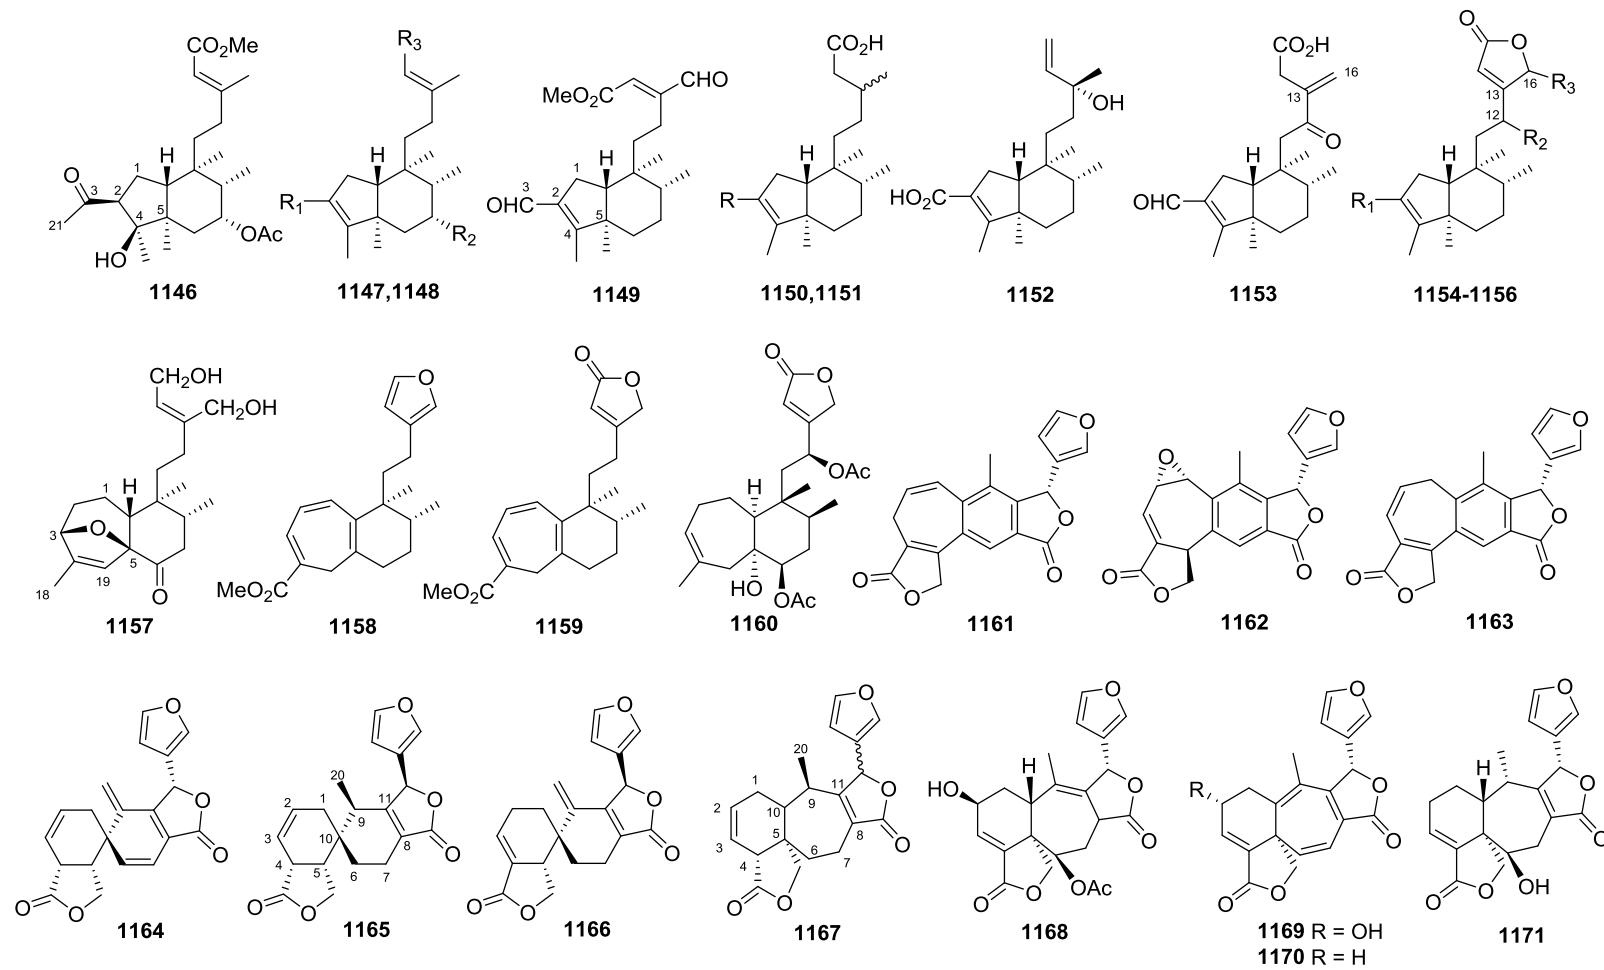

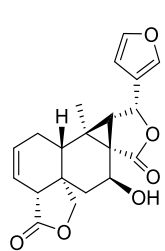

1172

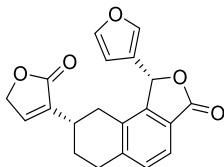

1173

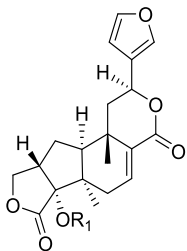

1174,1175

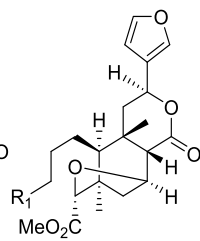

1176,1177

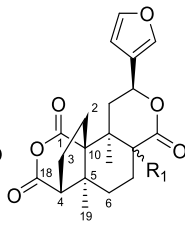

1178,1179

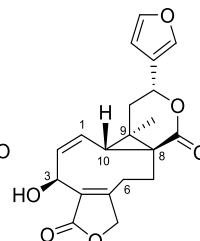

1180

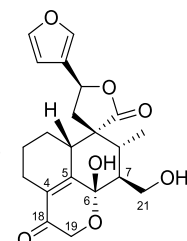

1181

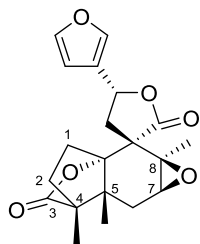

1182

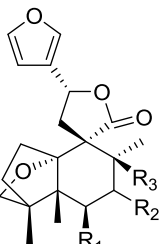

1183-1190

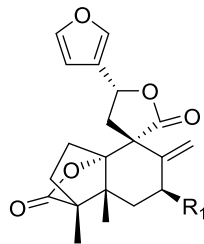

1191,1192

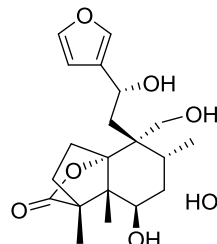

1193

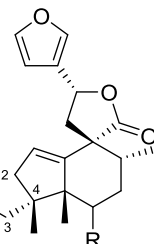

1194,1195

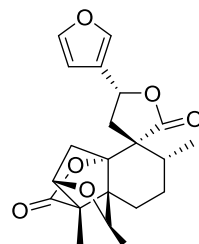

1196-1198

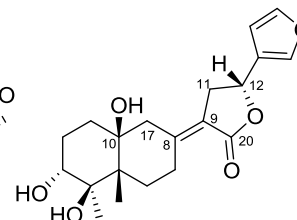

1199

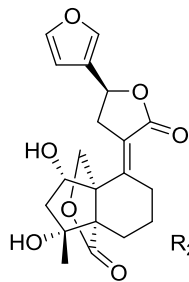

1200

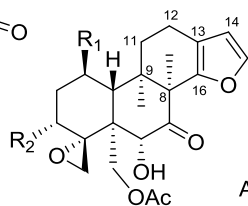

1201,1202

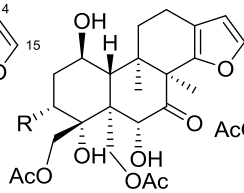

1203,1204

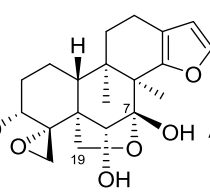

1205

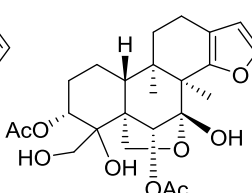

1206

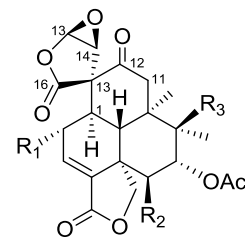

1207-1210

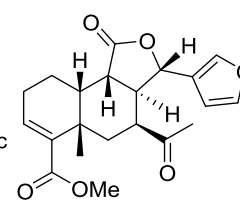

1211

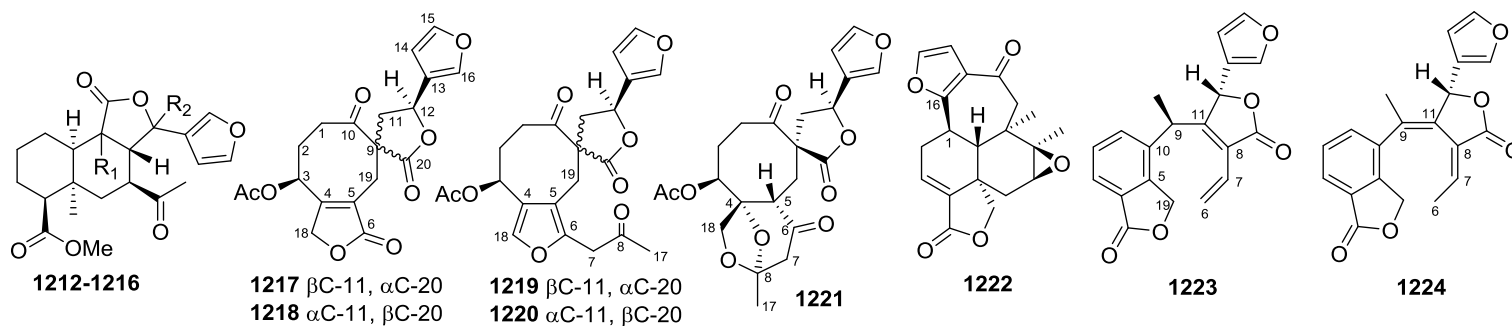

| No.  | Compound Name                                                             | R <sub>1</sub>    | R <sub>2</sub> | R <sub>3</sub>     | R <sub>4</sub> | Source                                           | Ref.                                                      |
|------|---------------------------------------------------------------------------|-------------------|----------------|--------------------|----------------|--------------------------------------------------|-----------------------------------------------------------|
| 1146 | —                                                                         | —                 | —              | —                  | —              | <i>Solidago altissima</i>                        | <i>Phytochemistry</i> , 1999, <b>52</b> , 487-493         |
| 1147 | —                                                                         | CHO               | $\alpha$ OAc   | CO <sub>2</sub> Me | —              |                                                  |                                                           |
| 1148 | (4→2)- <i>abeo</i> -cleroda-2,13 <i>E</i> -dien-2,14-dioic acid           | CO <sub>2</sub> H | H              | CO <sub>2</sub> H  | —              | <i>Polyalthia longifolia</i> var. <i>pendula</i> | <i>Molecules</i> , 2014, <b>19</b> , 2049-2060            |
| 1149 | (4→2)- <i>abeo</i> -2,13-diformyl-cleroda-2,13 <i>E</i> -dien-14-oic acid | —                 | —              | —                  | —              |                                                  |                                                           |
| 1150 | dunniana acid A                                                           | CO <sub>2</sub> H | —              | —                  | —              | <i>Clausena dunniana</i>                         | <i>J. Nat. Prod.</i> , 2002, <b>65</b> , 392-394          |
| 1151 | dunniana acid B                                                           | CHO               | —              | —                  | —              |                                                  |                                                           |
| 1152 | (+)-(4→2)- <i>abeo</i> -kolavelool-3-oic acid                             | —                 | —              | —                  | —              | <i>Aristolochia chamissonis</i>                  | <i>Phytochemistry</i> , 1999, <b>50</b> , 455-461         |
| 1153 | pentandranoic acid A                                                      | —                 | —              | —                  | —              | <i>Callicarpa pentandra</i>                      | <i>J. Nat. Prod.</i> , 2000, <b>63</b> , 1062-1065        |
| 1154 | pentandralactone                                                          | CHO               | $\alpha$ OH    | H                  | —              |                                                  |                                                           |
| 1155 | (4→2)- <i>abeo</i> -16(R&S)-2,13 <i>Z</i> -kolavadien-16,15-olide-3-al    | CHO               | H              | $\beta$ OH         | —              | <i>Polyalthia viridis</i>                        | <i>Phytochemistry</i> , 1990, <b>29</b> , 653-655         |
| 1156 | polylongifoliaic A                                                        | CO <sub>2</sub> H | H              | OH                 | —              | <i>Polyalthia longifolia</i> var. <i>pendula</i> | <i>RSC Advances</i> , 2014, <b>4</b> , 23707-23712        |
| 1157 | pilosanone C                                                              | —                 | —              | —                  | —              | <i>Portulaca pilosa</i>                          | <i>Phytochemistry</i> , 1995, <b>40</b> , 205-207         |
| 1158 | methyl dodovisate A                                                       | —                 | —              | —                  | —              | <i>Dodonaea viscosa</i>                          | <i>J. Asian. Nat. Prod. Res.</i> , 2010, <b>12</b> , 7-14 |
| 1159 | methyl dodovisate B                                                       | —                 | —              | —                  | —              |                                                  |                                                           |
| 1160 | scapanialide B                                                            | —                 | —              | —                  | —              | <i>Scapania parva</i>                            | <i>Phytochem. Lett.</i> , 2012, <b>5</b> , 535-540        |
| 1161 | isosalvipuberulin                                                         | —                 | —              | —                  | —              | <i>Salvia leucantha</i>                          | <i>J. Nat. Med.</i> , 2006, <b>60</b> , 206-209           |
| 1162 | salvileucantholide                                                        | —                 | —              | —                  | —              |                                                  | <i>Tetrahedron</i> , 1994, <b>50</b> , 11593-11600        |
| 1163 | dugesin B                                                                 | —                 | —              | —                  | —              | <i>Salvia dugesii</i>                            | <i>Helv. Chim. Acta</i> , 2004, <b>87</b> , 949-955       |
| 1164 | spiroleucantholide                                                        | —                 | —              | —                  | —              | <i>Salvia leucantha</i>                          | <i>J. Nat. Med.</i> , 2006, <b>60</b> , 206-209           |
| 1165 | salvioccidentalinalin                                                     | —                 | —              | —                  | —              | <i>Salvia occidentalis</i>                       | <i>Molecules</i> , 2011, <b>16</b> , 9109-9115            |
| 1166 | dugesin C                                                                 | —                 | —              | —                  | —              | <i>Salvia dugesii</i>                            | <i>Nat. Prod. Bioprospect.</i> , 2011, <b>1</b> , 81-86   |
| 1167 | blepharolide B                                                            | —                 | —              | —                  | —              | <i>Salvia blepharophylla</i>                     | <i>Phytochemistry</i> , 1999, <b>52</b> , 1535-1540       |
| 1168 | 2 $\beta$ -hydroxysalvigenolide                                           | —                 | —              | —                  | —              | <i>Salvia xalapensis</i>                         | <i>J. Nat. Prod.</i> , 2005, <b>68</b> , 787-790          |

|      |                                                         |             |              |              |             |                                |                                                         |
|------|---------------------------------------------------------|-------------|--------------|--------------|-------------|--------------------------------|---------------------------------------------------------|
| 1169 | salviandulin E                                          | —           | —            | —            | —           | <i>Salvia leucantha</i>        | <i>Tetrahedron</i> , 1994, <b>50</b> , 11593-11600      |
| 1170 | dugesin A                                               | —           | —            | —            | —           | <i>Salvia dugesii</i>          | <i>Helv. Chim. Acta</i> , 2004, <b>87</b> , 949-955     |
| 1171 | dugesin D                                               | —           | —            | —            | —           |                                | <i>Nat. Prod. Bioprospect.</i> , 2011, <b>1</b> , 81-86 |
| 1172 | blepharolide A                                          | —           | —            | —            | —           | <i>Salvia blepharophylla</i>   | <i>Phytochemistry</i> , 1999, <b>52</b> , 1535-1540     |
| 1173 | tilifodiolide                                           | —           | —            | —            | —           | <i>Salvia dugesii</i>          | <i>J. Org. Chem.</i> , 1990, <b>55</b> , 3522-3525      |
| 1174 | baenzigeride A                                          | H           | —            | —            | —           | <i>Tinospora baenzigeri</i>    | <i>Phytochemistry</i> , 1999, <b>52</b> , 1335-1340     |
| 1175 | baenzigeroside A                                        | Glc         | —            | —            | —           |                                |                                                         |
| 1176 | baenzigeride B                                          | H           | —            | —            | —           |                                | <i>Chem. Pharm. Bull.</i> , 2001, <b>49</b> , 854-857   |
| 1177 | baenzigeroside B                                        | Glc         | —            | —            | —           |                                |                                                         |
| 1178 | —                                                       | $\alpha$ H  | —            | —            | —           | the smoke of salvinorin A      | <i>Tetrahedron Lett.</i> , 2010, <b>51</b> , 5207-5209  |
| 1179 | —                                                       | $\beta$ H   |              |              |             |                                |                                                         |
| 1180 | microphyllandiolide                                     | —           | —            | —            | —           | <i>Salvia microphylla</i>      | <i>Org. Lett.</i> , 2013, <b>15</b> , 3210-3213         |
| 1181 | teubetonin                                              |             |              |              |             | <i>Teucrium betonicum</i>      | <i>Tetrahedron</i> , 1995, <b>51</b> , 2363-2368        |
| 1182 | 7 $\beta$ ,8 $\beta$ -epoxyisochiliolide lactone        | —           | —            | —            | —           | <i>Microglossa pyrrhopappa</i> | <i>Phytochemistry</i> , 1990, <b>29</b> , 3233-3241     |
| 1183 | 6 $\beta$ -angeloxyisochiliolide lactone                | OAng        | H            | H            | =O          |                                |                                                         |
| 1184 | 6 $\beta$ -[2-methylbutyryloxy]-isochiliolide lactone   | OMeBu       | H            | H            | =O          |                                |                                                         |
| 1185 | 8 $\beta$ -hydroxyisochiliolide lactone                 | H           | H            | OH           | =O          |                                |                                                         |
| 1186 | isochiliolide lactone                                   | H           | H            | H            | =O          |                                |                                                         |
| 1187 | 7 $\beta$ -angeloxyisochiliolide lactone                | H           | $\beta$ OAng | $\beta$ H    | =O          | <i>Pteronia divaricata</i>     | <i>Phytochemistry</i> , 1990, <b>29</b> , 1231-1245     |
| 1188 | 3 $\alpha$ -hydroxypteronia lactone                     | OAc         | $\beta$ H    | $\beta$ OAng | $\alpha$ OH |                                |                                                         |
| 1189 | 3 $\beta$ -hydroxypteronia lactone                      | OAc         | $\beta$ H    | $\beta$ OAng | $\beta$ OH  |                                |                                                         |
| 1190 | 3-oxo-pteronia lactone                                  | OAc         | $\beta$ H    | $\beta$ OAng | =O          | <i>Microglossa pyrrhopappa</i> | <i>Phytochemistry</i> , 1990, <b>29</b> , 3233-3241     |
| 1191 | 8(17)-dehydroisochiliolide lactone                      | H           | —            | —            | —           |                                |                                                         |
| 1192 | 7 $\beta$ -acetoxy-8(17)-dehydro- isochiliolide lactone | OAc         | —            | —            | —           |                                |                                                         |
| 1193 | 6 $\beta$ -hydroxyisochiliolide                         | —           | —            | —            | —           |                                |                                                         |
| 1194 | 6 $\beta$ -hydroxy-incana-pteroniolide                  | $\beta$ OH  | —            | —            | —           | <i>Pteronia incana</i>         | <i>Phytochemistry</i> , 1990, <b>29</b> , 1231-1245     |
| 1195 | incanapteroniolide                                      | H           | —            | —            | —           |                                |                                                         |
| 1196 | 19 $\alpha$ -hydroxypteronia-dilactone                  | $\alpha$ OH | —            | —            | —           | <i>Pteronia eenii</i>          | <i>Phytochemistry</i> , 1990, <b>29</b> , 1231-1245     |
| 1197 | 19 $\beta$ -hydroxypteronia-dilactone                   | $\beta$ OH  | —            | —            | —           |                                |                                                         |
| 1198 | pteroniatriolactone                                     | =O          | —            | —            | —           |                                |                                                         |
| 1199 | eeniolide                                               | —           | —            | —            | —           |                                |                                                         |
| 1200 | jamesoniellide C                                        | —           | —            | —            | —           | <i>Jamesoniella autumnalis</i> | <i>Phytochemistry</i> , 1994, <b>37</b> , 491-494       |

|      |                     |            |            |            |   |                              |                                                       |                                                    |
|------|---------------------|------------|------------|------------|---|------------------------------|-------------------------------------------------------|----------------------------------------------------|
| 1201 | alysine A           | OH         | OAc        | —          | — | <i>Teucrium alyssifolium</i> | <i>Tetrahedron</i> , 1995, <b>51</b> , 11793-11800.   |                                                    |
| 1202 | alysine C           | H          | OH         | —          | — |                              |                                                       |                                                    |
| 1203 | alysine B           | OAc        | —          | —          | — |                              |                                                       |                                                    |
| 1204 | 3-deacetylalysine B | OH         | —          | —          | — |                              |                                                       |                                                    |
| 1205 | alysine D           | —          | —          | —          | — |                              |                                                       | <i>J. Nat. Prod.</i> , 1997, <b>60</b> , 1045-1047 |
| 1206 | alysine E           | —          | —          | —          | — |                              |                                                       |                                                    |
| 1207 | salvilanguiduline A | H          | H          | H          | — | <i>Salvia languidula</i>     | <i>Tetrahedron Lett.</i> , 1992, <b>33</b> , 581-584  |                                                    |
| 1208 | salvilanguiduline B | OH         | H          | H          | — |                              |                                                       |                                                    |
| 1209 | salvilanguiduline C | H          | OH         | H          | — |                              |                                                       |                                                    |
| 1210 | salvilanguiduline D | H          | H          | OH         | — |                              |                                                       |                                                    |
| 1211 | cephaloziellin Q    | —          | —          | —          | — | <i>Jamesoniella colorata</i> | <i>Nat. Prod. Commun.</i> , 2010, <b>5</b> , 999-1003 |                                                    |
| 1212 | cephaloziellin L    | $\beta$ H  | $\alpha$ H | $\Delta^3$ |   | <i>Cephaloziella kiaeri</i>  | <i>J. Nat. Prod.</i> , 2013, <b>76</b> , 1700-1708    |                                                    |
| 1213 | cephaloziellin M    | $\beta$ H  | $\beta$ H  | $\Delta^3$ |   |                              |                                                       |                                                    |
| 1214 | cephaloziellin N    | $\alpha$ H | $\alpha$ H |            |   |                              |                                                       |                                                    |
| 1215 | cephaloziellin O    | $\beta$ H  | $\alpha$ H |            |   |                              |                                                       |                                                    |
| 1216 | cephaloziellin P    | $\beta$ H  | $\beta$ H  |            |   |                              |                                                       |                                                    |
| 1217 | teubrevin E         | —          | —          | —          | — | <i>Teucrium brevifolium</i>  | <i>Tetrahedron</i> , 1995, <b>51</b> , 837-848        |                                                    |
| 1218 | teubrevin F         | —          | —          | —          | — |                              |                                                       |                                                    |
| 1219 | teubrevin G         | —          | —          | —          | — |                              |                                                       |                                                    |
| 1220 | teubrevin H         | —          | —          | —          | — |                              |                                                       |                                                    |
| 1221 | teubrevin I         | —          | —          | —          | — |                              |                                                       |                                                    |
| 1222 | salvixalapoxide     | —          | —          | —          | — | <i>Salvia xalapensis</i>     | <i>J. Nat. Prod.</i> , 2005, <b>68</b> , 787-790      |                                                    |
| 1223 | salvixalapadiene    | —          | —          | —          | — |                              |                                                       |                                                    |
| 1224 | isosalvixalapadiene | —          | —          | —          | — |                              |                                                       |                                                    |



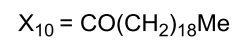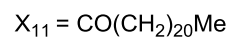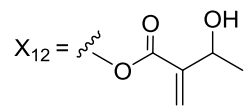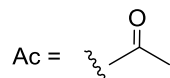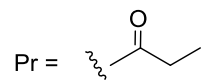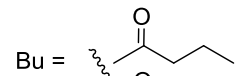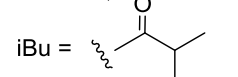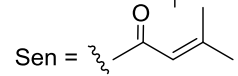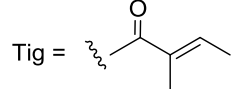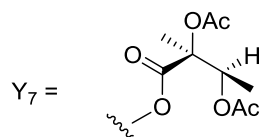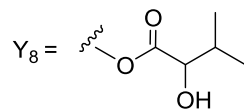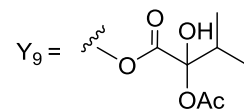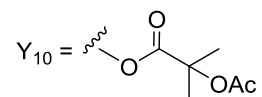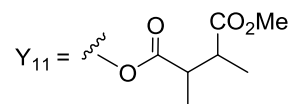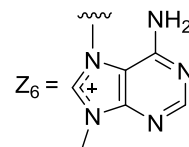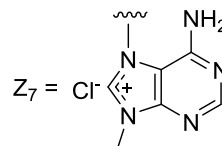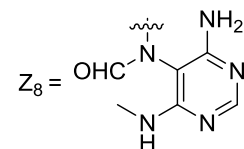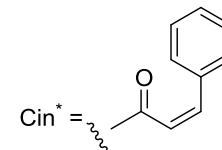

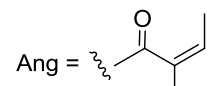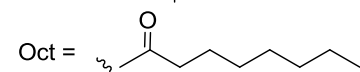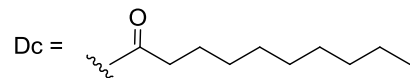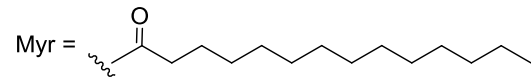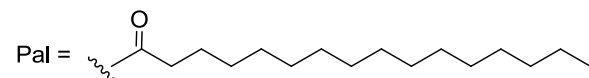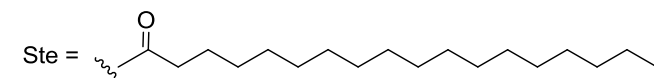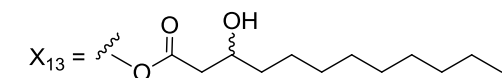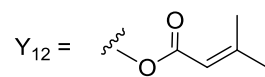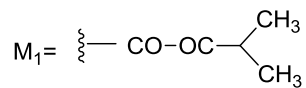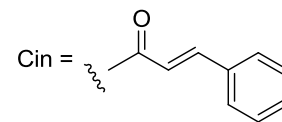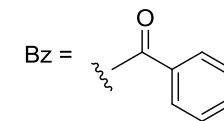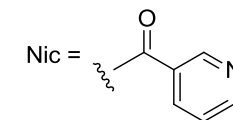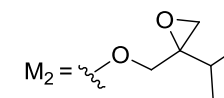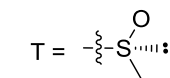

Supplement: NIHMS834275-supplement-Supplementary_Information_2.pdf [file NIHMS834275-supplement-Supplementary_Information_2.pdf]
